# Supplementary material for: Using Elevated Cholesterol Synthesis as a Prognostic Marker in Wilms' Tumor: A Bioinformatic Analysis
Source: Biomed Res Int. 2021 Jan 28;2021:8826286. doi: 10.1155/2021/8826286 (PMC7886595; doi:10.1155/2021/8826286)
Supplement: Supplementary Materials — 1 The gene expression matrix was presented in the supplementary material. 2 All the raw code used in this study were listed as supplementary methods. 3 The baseline characteristics of the patients were summarized in the supplementary. Table 1 The raw data of gender, subtypes, and stage for 130 patients with Wilms tumor was summarized as supplementary Table 2. [file 8826286.f1.zip › supplementary materials.txt]

geneNames	TARGET-50-PAKMUB-01A-02R	TARGET-50-PAJNLT-01A-01R	TARGET-50-PAKYFC-01A-01R	TARGET-50-CAAAAM-01A-01R	TARGET-50-PAJNYT-01A-02R	TARGET-50-PAJNCJ-01A-01R	TARGET-50-PAJMVC-01A-01R	TARGET-50-PAJMEL-01A-01R	TARGET-50-PAJNJJ-01A-01R	TARGET-50-PAJMKJ-01A-01R	TARGET-50-PAKECR-01A-01R	TARGET-50-PAEBXA-01A-01R	TARGET-50-PALGVY-01A-01R	TARGET-50-PAKZFK-01A-01R	TARGET-50-PAKZER-01A-01R	TARGET-50-PALJIP-02A-01R	TARGET-50-PAKZHF-01A-01R	TARGET-50-PAKRZW-01A-01R	TARGET-50-PAJLSP-01A-01R	TARGET-50-PAJMEN-01A-01R	TARGET-50-PAJMKN-01A-01R	TARGET-50-PAJNGH-02A-01R	TARGET-50-PAJNZU-01A-01R	TARGET-50-PAJPAU-01A-01R	TARGET-50-CAAAAS-01A-01R	TARGET-50-PAJPHA-01A-01R	TARGET-50-PAJMFY-01A-01R	TARGET-50-PAECJB-01A-01R	TARGET-50-PAJLTI-01A-01R	TARGET-50-PALGAZ-01A-01R	TARGET-50-PAJMSE-01A-01R	TARGET-50-PAKVET-01A-01R	TARGET-50-PAJNAV-01A-01R	TARGET-50-PAJMIZ-01A-01R	TARGET-50-PAJMMY-01A-01R	TARGET-50-PAJNTJ-01A-01R	TARGET-50-PAKSDG-01A-01R	TARGET-50-PAJNUP-01A-01R	TARGET-50-PAJLNJ-01A-01R	TARGET-50-PAJLKC-01A-01R	TARGET-50-PAJPDN-01A-01R	TARGET-50-PALKRS-01A-01R	TARGET-50-PALGLU-01A-01R	TARGET-50-PAJNNR-01A-01R	TARGET-50-PAJMUF-01A-01R	TARGET-50-PAJMLZ-01A-01R	TARGET-50-PAJMEP-01A-01R	TARGET-50-PAJNCZ-01A-01R	TARGET-50-PAKGED-01A-01R
TSPAN32	0.186	0.1395	0.1616	0.1692	0.1777	0.2112	0.0919	0.1132	0.1442	0.0706	0.0922	0.097	0.1106	0.5223	0.0473	0.0561	0.2835	0.1602	0.0401	0.3862	0.1335	0.1258	0.0896	0.075	0.0429	0.2506	0.1333	0.1524	0.1055	0.1484	0.2771	0.1082	0.0828	0.2495	0.0715	0.2183	0.1063	0.372	0.1107	0.0465	0.1133	0.0568	0.1531	0.0754	0.0444	0.1014	0.1165	0.1327	0
TK2	2.4784	3.6911	2.5412	1.2378	1.9131	2.9338	1.7722	2.1125	2.8886	1.911	1.0828	1.9963	2.3374	2.5234	1.4915	2.457	1.3902	2.6389	1.2981	4.9738	4.0986	2.7449	2.5848	2.3756	1.7919	3.4128	2.6452	3.1723	1.8268	3.1512	1.0602	4.2029	1.7441	2.5884	1.3656	2.714	1.9945	0.8965	2.0834	0.7341	1.311	0.9121	2.0189	1.2346	2.1448	1.3295	1.982	2.4676	0.2232
AC024361.1	0.6332	0.5496	0.4296	0.5216	0.3	0.2612	1.2899	0.4661	0.2198	0.5008	0.1038	0.4047	0.7187	0.7905	0.4055	0.6878	0.9249	0.2989	0.6314	1.8063	0.7885	0.58	0.8033	0.5694	0.2716	0.5777	0.5249	0.9962	0.1983	0.4833	0.0599	0.2664	0.6068	0.8373	0.2445	0.9874	0.1794	0.1503	0.5451	0.4707	0.1522	0.2745	0.6786	0.1733	0.5026	0.4795	0.1992	0.6613	0
STAT5A	3.9191	0.8493	1.4299	3.6761	1.7692	1.2368	0.5226	1.7456	0.7204	1.5366	1.5865	1.0047	1.4105	1.8722	1.8271	2.6888	0.9009	1.6592	0.7221	0.6916	0.8339	1.4905	1.0796	0.6164	0.8829	1.0756	0.3594	1.2099	2.2349	1.2382	0.4589	0.9391	2.5071	0.4041	0.6424	2.3517	0.4269	2.3115	0.5911	1.5644	0.7097	0.9391	0.8216	0.3259	0.4901	1.0088	0.5618	0.6969	0.1772
AC103853.1	0.0184	0	0.0236	0.1505	0.0848	0	0	0.0601	0	0	0	0.0667	0.0485	0.0757	0.0138	0.0252	0.0495	0	0	0.0188	0.0678	0	0.1264	0.0417	0.0179	0	0	0.019	0.1682	0	0.0395	0.0263	0	0	0	0	0	0.0372	0	0	0.1204	0	0	0.0245	0.0432	0	0	0.0242	0
AC061965.1	0	0.0361	0	0.0095	0.0094	0.0509	0	0.0355	0.0361	0	0	0	0	0.0447	0	0	0	0	0.0115	0.0167	0.03	0	0	0.0092	0.0159	0.0079	0.0105	0.0336	0.0124	0.0157	0.0262	0.0467	0	0.008	0.0195	0.0353	0	0	0	0.0172	0	0.0134	0.022	0	0.0192	0.0075	0.0079	0	0.0682
RANBP3	9.2763	10.6961	11.6627	6.0365	8.9469	12.8967	1.6626	9.8509	10.0479	12.3891	8.1713	10.0725	9.7762	11.7316	12.6246	11.6537	9.42	8.869	12.062	10.5921	10.418	12.4076	10.0142	11.2179	12.6703	9.3826	13.4663	11.3713	12.3526	12.8692	12.1989	10.9745	6.6553	8.9763	10.6463	13.1049	15.6194	6.0851	10.2337	12.3718	3.1075	3.5553	6.6472	12.9835	10.5977	12.7581	12.2069	13.4501	1.0422
CYCSP39	0	0	0	0.0452	0.0445	0	0.0705	0.1263	0	0.0578	0.0539	0	0.0339	0.053	0.0581	0	0	0.0518	0	0	0	0.0753	0	0	0.0752	0	0	0.0796	0	0.0372	0	0	0	0.0378	0.0462	0.0837	0	0	0.0453	0.0407	0	0.1901	0.1567	0.0514	0.0908	0.0356	0	0.0509	0
HIST2H2BF	0.303	2.5501	1.4478	0.1615	0.6241	0.7228	2.4001	1.0299	0.8003	1.6375	0.6515	0.5521	0.6693	0.3535	0.972	2.0878	2.0487	0.5304	1.3898	0.5156	0.3925	1.7113	1.8593	2.2154	1.7788	1.3236	1.1599	1.1545	1.6789	3.3042	1.0387	0.6474	0.291	0.2779	1.6566	1.4612	4.5279	0.5735	0.5606	0.9376	0.5625	0.2757	1.8276	1.1336	1.2115	3.1783	1.6517	1.0037	0.3629
RN7SL190P	0	0.0686	0	0	0.0535	0	0	0	0	0	0	0	0	0.0637	0	0	0	0.1244	0	0	0	0	0	0.2107	0	0	0	0.0479	0	0	0	0	0.0489	0	0.0555	0	0	0	0	0.049	0	0	0.4395	0	0.1092	0	0	0	0
BOD1P2	0	0	0	0	0	0	0	0	0	0	0	0	0	0	0	0	0	0	0	0	0	0	0	0	0	0	0	0.0256	0	0	0.0266	0	0	0	0	0	0	0	0	0.0262	0	0	0	0	0	0	0	0	0
POLR3D	8.0465	6.2346	8.009	20.403	7.7425	7.6297	3.8683	11.1532	5.4448	6.6563	10.6194	7.1908	8.3051	7.948	7.9299	11.6795	9.6903	4.7453	4.5512	5.7283	4.8444	5.5292	10.5489	6.2105	4.9581	8.4896	6.4046	10.6908	5.5142	7.307	6.6015	7.1406	2.9629	3.0739	8.6552	9.8677	7.4156	4.3884	7.2172	7.3462	3.9874	2.7425	7.914	3.39	12.364	5.8955	5.6034	8.4243	2.0386
AC132154.1	0	0	0.0072	0	0.0193	0	0	0	0	0.0084	0	0	0	0	0.0042	0	0	0.015	0	0	0.0103	0	0	0.019	0	0	0	0	0	0.0054	0	0.016	0	0	0	0.0182	0	0	0	0	0	0	0.0227	0	0	0	0	0	0
AL121906.1	0	0.0802	0.1393	0.0317	0	0.2117	0	0.1774	0.0401	0.1218	0.1136	0.0492	0.1192	0.1488	0.0816	0.0743	0.0365	0	0.1152	0.2774	0.05	0.2645	0.1598	0.0308	0.2378	0.158	0.1044	0.0839	0	0.235	0.0291	0.0777	0	0.0531	0.0973	0.1176	0.0872	0.0548	0.0318	0.1145	0.0888	0	0.11	0	0.0319	0.075	0.0264	0.1787	0
AC093655.1	0	0	0	0	0.0429	0	0	0	0	0	0.052	0	0.0164	0	0	0	0	0	0	0	0	0	0	0	0	0	0	0	0.0284	0	0	0.0534	0	0	0	0.0202	0	0	0	0	0	0	0.0755	0	0	0	0	0	0
OIT3	5.1113	0.0597	0.0324	0.0413	0.1571	0.1812	0.3594	0.1705	0.1417	0.1284	0.0916	0.1785	0.204	0.1038	0.1594	0.2005	0.0407	0.2772	0.0571	0.2736	0.2047	0.743	0.4113	0.063	0.0934	0.2156	0.0194	0.1404	0.6076	0.0875	0.0379	0.2892	0.0478	0.0296	0.0845	0.1258	0.0406	0.1122	0.3551	0.1224	0.0165	0.2649	0.2183	0.0873	0.0475	0.1302	0.1229	0.7447	0.1099
RPL7L1P8	0	0.0238	0.0207	0.0188	0.0928	0.0251	0	0.0176	0	0	0.1124	0	0.0142	0.0221	0	0	0	0.1079	0.0228	0	0	0	0.0633	0.0183	0.0157	0	0	0.1328	0.0245	0.0155	0	0	0.0339	0	0.0193	0.0349	0.0259	0	0	0	0	0	0.0436	0	0.0189	0.0148	0	0	0
HEATR5B	4.6743	3.5558	4.2627	2.9636	4.6839	4.9264	2.09	4.2269	2.6267	4.4382	2.9658	2.1873	2.7704	4.0759	3.5524	6.6627	3.4088	2.5256	4.1061	3.1641	3.7872	3.524	5.4019	2.7848	4.1312	3.3361	3.6774	4.651	3.879	5.1069	4.3108	4.0886	2.2832	3.4803	4.5373	3.9932	2.9703	2.0117	3.0739	4.8881	2.2335	1.7941	4.6681	3.2552	3.7697	3.6024	3.9122	3.9782	0.4386
SMIM11B	0.0028	0.0041	0.0071	0	0.0032	0.0086	0.0202	0.003	0.0041	0.0041	0	0.005	0.0049	0	0.0042	0	0.0148	0.0111	0.0039	0.0056	0	0.0027	0.0054	0.0031	0.0054	0.0054	0.0035	0.0057	0	0.0053	0.0119	0	0.0087	0.0054	0.0033	0.012	0.0044	0	0	0.0058	0	0.0045	0.0037	0.0037	0.0065	0.0127	0.0081	0.0073	0.0277
AC060814.4	0	0	0	0	0	0	0	0	0	0	0	0	0	0	0	0	0	0	0	0	0	0	0	0	0	0	0	0	0	0	0	0	0	0	0	0	0	0	0	0	0	0	0	0	0	0	0	0	0
AL442224.1	0.1529	0.0451	0.0784	0	0	0	0.0557	0	0.0902	0.0457	0	0	0	0	0.023	0	0	0	0	0	0.0563	0	0.03	0.1039	0	0	0	0.0315	0	0	0	0.0875	0	0.0299	0	0.0993	0	0.0925	0	0	0	0.1502	0.0413	0.0406	0.0359	0	0.0297	0	0
AF254982.1	0	0	0	0	0	0	0	0	0	0	0	0	0	0	0	0	0	0	0	0	0	0	0	0	0	0	0	0	0	0	0	0	0	0	0	0	0	0	0	0	0	0	0	0	0	0	0	0	0
POLR2KP1	0.427	1.1551	1.0032	0.3322	0.6551	0.2218	0.2594	0.3098	1.3649	1.0632	0.7932	0.7733	0.1248	0.7796	1.1222	0.7788	0.2866	0.5711	1.9101	1.9619	0.6551	1.3161	0.8372	0.8864	1.6608	0.6899	0.2735	1.025	0.2165	1.026	0.2289	1.3232	0.5984	0.2087	1.6989	0.539	0.1142	0.2871	0.8332	1.7236	0.5815	0.3496	1.0565	0.5675	0.2505	1.1779	0.4845	1.2168	0.119
HLA-DRB1	59.9854	25.2443	39.4442	115.7513	49.277	37.7301	78.3447	14.7565	22.8198	63.7755	30.199	38.2637	25.387	28.6502	24.8959	19.3899	40.2689	38.6914	32.5615	8.3128	34.6012	57.2569	27.5311	32.0389	30.7937	44.9915	28.1105	22.0245	46.938	22.321	35.1876	74.6302	19.1481	37.2785	13.2642	52.1722	14.3501	72.2947	43.2386	7.6274	74.2487	62.3217	10.4436	32.4392	17.7732	13.4636	24.0752	24.6967	25.0886
AL627389.1	0.3338	0.3283	0.4278	0.0826	0.2444	0.1734	0.1291	0.2862	0.6865	0.1964	0.3382	0.5404	0.2573	0.7202	0.3418	0.2906	0.2715	0.2165	0.5001	0.5267	0.8193	0.1871	0.238	0.0458	0.0197	0.2844	0.3629	0.3434	0.0769	0.3791	0.5964	0.3183	0.202	0.3757	0.169	0.2408	0.1137	0.0714	0.379	0.4687	0.248	0.3147	0.1911	0.2017	0.1187	0.4557	0.3049	0.2395	0.0677
AL078604.1	1.2829	0.7193	1.085	2.3654	1.0627	0.3998	7.9967	0.698	1.5519	1.7632	1.9303	1.1383	1.4401	1.0891	1.3679	0.737	1.2398	1.7158	0.9786	0.9954	0.9919	0.4245	0.4276	0.581	0.1497	1.6415	0.9533	1.3725	1.0539	0.1726	0.4126	0.2569	2.6427	2.9339	0.3981	0.4719	0.8237	0.8798	1.7723	0.5944	1.5934	5.3356	2.1122	1.2276	1.2644	0.8729	0.5489	0.5737	14.2899
TUBBP11	0	0	0	0	0	0	0	0	0	0	0	0	0	0	0	0	0	0	0	0	0	0	0	0	0	0	0	0.0488	0	0	0	0	0	0	0	0	0	0	0	0	0	0	0.1281	0	0	0	0	0	0
GOLGA2P5	0.3961	1.2059	1.0544	0.028	0.2611	0.7566	0.0955	0.228	1.2927	0.6847	0.2326	0.6313	0.4996	0.5977	0.4908	0.5896	0.3984	0.6816	1.247	2.3853	0.9903	1.2426	0.7541	0.7969	0.7905	0.7754	0.6501	0.4838	0.7088	0.6586	0.5053	0.6383	1.476	0.5258	0.5822	0.8229	0.4467	0.1222	0.3539	1.2708	0.5849	0.3752	1.0029	0.5729	0.2932	0.6411	0.9742	0.8309	0.1095
AC022417.1	0.4405	0.1489	0.3528	0.4283	0.5807	0.386	0.2007	0.4194	0.8393	1.1789	0.7798	0.5151	0.3219	0.6408	0.379	0.3138	0.2463	0.7732	0.3111	0.5715	1.1993	0.4376	0.4408	0.4364	0.1249	0.427	0.6348	0.4342	0.2234	0.291	0.7279	0.8137	0.6944	1.0582	0.3176	0.5262	0.1768	0.3979	0.5157	0.6667	0.2999	0.2254	0.2724	0.9634	0.3661	0.4725	0.3926	0.5672	0.1995
PRSS21	0.0061	0.0448	0.1636	0.0213	0.0629	2.936	0.0886	0.0728	0.0807	0.0091	0.0085	0	0.0053	1.5398	0.0046	0.0166	6.1028	0.187	0.3177	3.4691	0.0112	0	0.0775	0.5437	0.0118	0.112	1.1448	0.1501	0.1387	0.9756	0.0065	0.0261	0.0064	2.305	0	0.0132	0.2634	0.3065	0.5551	0.0064	0.2185	0.8062	0.0492	0.4443	0.4208	1.5481	0.1182	0	0.1525
AC004882.1	0.0309	0	0	0.0361	0.0712	0.0723	0	0.0337	0	0	0.0215	0.014	0	0.0212	0.0116	0	0	0	0	0	0	0.0151	0.0152	0	0	0	0	0.0318	0.0235	0	0	0.0221	0	0	0	0	0	0	0.0724	0.0163	0.0253	0	0.0626	0	0	0.0142	0.015	0.0203	0
FAM120A	18.1957	15.1753	31.5602	12.0255	26.0142	33.3073	13.2858	22.9561	32.0019	19.1012	22.307	19.9128	18.3725	28.5411	13.432	16.8883	27.842	25.4281	29.9388	34.9387	45.3913	30.0859	26.3261	37.2356	33.0324	18.1605	39.9239	25.8271	37.0807	26.0636	67.7907	50.463	25.8058	40.8388	24.5524	37.4319	30.5602	14.9524	27.0221	41.3282	16.2688	13.5528	20.3645	28.7416	26.3485	35.1917	28.6909	27.7324	7.3005
LRRC19	0.2021	0.4937	0.7514	0.0387	0.5565	0.1549	0.1328	0.0613	0.1857	1.0393	0.0692	0.5279	0.0901	0.1678	0.1592	0.2538	0.2446	0.771	0.6411	0.3146	0.7318	0.2128	0.1396	0.2176	0.2287	0.2055	0.2377	0.242	0.2167	0.5636	0.1669	0.9097	0.3691	0.1716	0.3322	0.4481	0.0372	0.0668	0.1513	0.164	0.5793	0.5425	0.532	1.2813	0.105	0.2711	0.1256	0.2658	0.8921
LSM14B	6.1428	8.3119	7.0876	5.8559	6.0991	8.1879	9.8358	5.5913	6.297	8.8859	5.4443	6.8585	5.4834	8.9387	10.9111	11.1837	8.1026	8.9063	13.108	7.3943	7.4928	8.3741	8.0218	5.4657	9.6038	8.3883	9.8813	9.0329	5.5682	6.155	7.1079	5.9985	10.2135	9.3455	7.7497	5.6666	7.09	5.4211	8.3879	13.5805	4.4616	4.285	5.7269	9.6443	8.8424	10.3659	6.4482	7.9764	4.6193
RF01210	0	0	0	0	0	0	0	0	0	0	0.1602	0	0	0	0.1727	0	0	0	0.4872	0	0	0	0	0	0	0	0	0	0	0.1105	0	0	0	0	0	0	0	0	0	0.1211	0	0	0.9309	0	0	0	0	0	0
AL356752.1	0.121	0.9222	0.2584	0.0235	0	0.2827	0.1102	0.0219	0.0595	0.1506	0.1405	0.5112	0.2652	0.3865	0.1968	0.1931	0.4601	0.0539	0.4557	0.3705	0.1856	0.1766	0.1779	0.0913	0.1176	0.1954	0.0517	0.1037	0.1227	0.0969	0.0648	0.0577	0.106	0.0591	0.0481	0.1527	0.1295	0.061	0.2597	0.3397	0.0989	0	0.4898	0.1072	0	0.1298	0.098	0.2387	0.1012
AC021220.1	0	0	0	0	0.0218	0	0	0	0	0	0	0	0	0	0	0	0	0	0	0	0	0	0	0	0	0	0	0	0	0	0	0	0	0	0	0	0	0	0	0	0	0	0.0256	0	0.0223	0	0	0.025	0
LRGUK	0.5226	1.2271	0.4669	0.2147	0.5293	0.3555	0.7915	0.2683	0.9827	0.4508	0.2666	0.3532	0.7391	0.5795	0.3426	0.7702	0.3309	0.2313	1.1592	0.8379	1.2668	0.4656	0.5123	0.2625	0.6906	1.459	0.5941	0.212	0.2463	0.7144	0.6193	0.5895	0.2089	0.6366	0.8214	0.9437	0.2363	0.3006	0.3791	0.7091	0.3428	0.1265	0.9287	0.719	0.5959	0.3891	0.4402	0.6921	0.1723
AC018653.3	0.4564	2.4389	1.2606	0.0355	0.4434	0.6478	0.4436	0.6952	0.7181	0.712	0.3108	0.7254	0.9606	0.6943	0.495	1.6924	1.6879	0.2713	2.5929	3.1786	0.504	1.7174	1.1929	0.8727	1.4594	0.521	0.7666	1.0224	1.7588	0.7602	0.924	0.4351	0.1172	0.6839	2.6872	1.3935	1.6441	0.2557	0.6649	2.3279	0.3149	0.2491	1.1907	1.3074	0.3689	1.3241	2.5346	1.5471	0.0848
OR8K3	0	0	0	0	0	0	0	0	0	0	0	0	0	0	0	0	0	0	0	0	0	0	0	0	0	0	0	0	0	0	0	0	0	0	0	0	0	0	0	0	0	0	0	0	0	0	0	0	0
AC107953.2	0	0	0	0	0.0391	0	0	0	0	0	0.0592	0.0154	0	0	0	0	0	0.0114	0.012	0.0087	0.0625	0	0.0416	0.0385	0	0	0.0109	0.0349	0.0258	0	0	0	0.0178	0.0083	0.0101	0.0276	0	0.0086	0	0	0.0416	0.0417	0.0229	0	0.0199	0	0.0083	0	0
AC021549.1	0	0	0.0354	0	0	0.043	0	0.03	1.3036	0.0825	0	0.425	0.0484	0.2269	0.1244	0.1133	0	0	0.078	1.6633	2.0332	0.1344	0.1624	0.1251	0.1342	0	0.1061	0.0284	0.042	0.4511	0.1184	0.5134	1.8283	0.081	0.033	0.4183	0.3989	0.0278	0	0.1745	0.2256	0.3617	0.0745	0.0367	0	0.1016	0.1343	0	0
IGHV3-13	0	0	0.0713	0	0.032	0	0	0	0	0	0	0	0.5121	0.1523	0	0.038	1.3063	0	0	0.0284	0	0.0541	0.0273	0	0	0	0	0.0572	0.5922	0	0.0596	0.0795	0	0	0.0332	0	0	0	0	0	0.0454	0.0455	0.0375	0.1848	0.0326	0.0256	0	0.0366	0
HNRNPA1P13	0.0124	0.0366	0	0.0145	0.0286	0.0193	0.0226	0.0135	0.0183	0.0185	0.0173	0	0.0109	0	0.028	0.034	0.0167	0	0.0175	0	0	0.0242	0	0.0141	0.0121	0.012	0.0636	0.1022	0	0.0358	0.0266	0.0178	0	0.0121	0.0296	0.0403	0.0399	0	0.0436	0.0131	0	0	0.0168	0.0165	0	0.0457	0.0121	0.0163	0
C8orf44	1.599	1.8944	2.2264	2.1556	1.4168	3.1086	2.6533	1.4387	2.7603	2.6097	2.6533	1.7935	3.3154	3.9671	1.8995	3.4603	2.1078	2.4386	3.0812	7.3389	3.8045	3.1729	2.2272	3.5507	2.1581	3.5626	3.0758	2.622	1.5394	2.3899	1.8573	2.2254	4.4044	4.6275	2.7061	3.7699	1.6702	1.5115	2.0899	2.8748	2.6911	2.0164	2.2545	4.3897	2.7554	1.7818	1.8195	2.6616	2.1394
CHMP1B	18.7299	28.5356	15.7382	12.5866	17.3962	19.7639	18.6525	19.03	43.8953	13.3757	13.3853	19.7727	17.2433	21.6196	13.0201	21.469	19.2172	16.4315	34.1772	21.932	23.4583	16.7696	19.5576	33.8853	34.6029	21.9278	31.9001	17.1407	19.4044	19.0801	23.0193	23.4387	19.3719	18.6338	18.3365	17.7526	21.9638	22.5808	18.3704	34.6204	25.6629	21.1869	23.7016	22.3009	22.794	20.6335	26.6281	19.3188	32.1894
AC124276.2	0.0435	0	0	0	0	0	0	0	0	0	0	0	0	0	0	0	0	0	0	0	0	0	0	0.0246	0	0	0	0	0	0	0.1165	0	0	0	0	0	0	0	0.0255	0	0	0	0	0	0	0	0	0	0
RPS27P22	0	0	0	0.1737	0	0	1.2659	0	0.0732	0	0.1382	0	0	0	0.0745	0	0	0.0664	0.1402	0	0.0913	0	0	0	0.0482	0.0481	0	0.1021	0	0.0954	0	0	0.5214	0.3394	0	0.1074	0	0	0.0581	0	0.0811	0.7311	0	0	0	0.0456	0	0.0652	0.9127
AC005832.1	0.0209	0.1542	0.1339	0	0.1203	0.0651	0	0.091	0.1542	0.0312	0	0.1703	0	0.0286	0.1256	0	0.0561	0.2796	0.1476	0.4268	0.077	0.2645	0.1025	0.1893	0.0813	0.0608	0.1607	0.086	0	0.1607	0	0.2093	0.1098	0.3064	0.0249	0.2035	0.1342	0	0.0734	0.088	0.0683	0	0.2539	0.1945	0.1717	0.0384	0.122	0.11	0
AC016956.1	0	0.0159	0	0	0.0124	0	0	0	0	0	0	0	0	0	0	0	0	0	0.0305	0	0	0.042	0.0317	0	0	0.0209	0	0.0111	0	0	0	0	0	0	0	0	0	0	0	0	0	0	0.0146	0.0143	0	0.0198	0	0	0
ZNF417	0.8532	2.0142	2.1576	0.5974	1.0635	2.0872	0.8242	0.9996	2.0224	1.555	0.9629	1.7047	1.1948	2.1769	1.0187	1.1593	1.3094	1.6585	1.8079	2.0239	1.7696	1.7799	2.1551	1.8098	3.0087	1.3068	1.738	1.7057	1.3283	1.4241	1.3323	2.5545	2.0685	1.6872	1.6091	1.2832	0.9587	0.4044	2.0277	2.6564	0.9714	0.7311	1.3856	1.6707	1.3115	1.399	1.5378	2.0236	0.3615
LINC02540	0	0	0	0	0.0483	0	0	0	0	0	0	0	0	0	0	0	0	0	0	0	0	0	0	0.0713	0	0	0	0	0	0	0	0	0	0	0	0	0	0	0	0	0	0	0	0	0.0246	0	0	0	0
RSBN1	5.8811	13.7761	8.4642	4.0514	8.3419	14.5778	7.4686	8.2692	9.9434	5.6002	5.5844	8.9286	9.1082	12.6574	7.3335	9.2195	7.9148	7.1387	13.8901	9.2712	8.8601	14.1781	13.1886	8.1479	9.3053	8.7975	15.199	10.5447	11.2993	11.0612	9.7495	10.0134	9.0206	10.4293	12.2745	8.9847	9.0685	5.3457	10.5882	17.5547	9.843	9.1989	8.4949	11.8824	9.719	11.4288	13.6105	11.9591	10.4722
AL354712.1	0	0	0	0.2048	0.0288	0	0	0.0273	0	0	0.0698	0	0	0	0	0	0	0.3688	0	0.0256	0	0	0	0	0	0	0	0	0.0381	0	0	0.0358	0	0	0	0	0	0.177	0	0	0	0	0	0	0	0	0	0	0
OR11N1P	0.014	0	0.0539	0.0327	0.0161	0	0	0	0.0414	0.0209	0.0586	0	0	0.1152	0.0211	0	0	0.0187	0.0396	0.0286	0.0258	0.0819	0	0	0	0.0543	0	0	0.064	0	0	0	0	0	0.1506	0.0607	0	0.0283	0.0164	0	0	0.023	0.0567	0.0373	0	0.0129	0.0409	0	0
ZNF733P	0	0	0	0	0.0084	0	0	0	0	0	0	0	0	0	0	0	0.0098	0	0	0	0.0268	0	0	0	0	0	0	0.015	0	0	0	0	0	0	0	0	0	0	0	0	0	0	0.0295	0	0	0.0134	0	0	0
MIR103A1	0	0.2051	0	0	0.16	0	0	0	0	0	0	0	0	0.1904	0	0	0.1866	0	0	0.1419	0	0	0	0	0	0	0	0	0	0	0.149	0	0	0	0	0	0	0	0	0	0	0	0	0	0	0	0.2704	0	0
MED13P1	0	0	0	0	0	0	0	0	0	0	0	0	0	0	0	0	0	0	0	0	0	0	0	0	0	0	0	0	0	0	0	0	0	0	0	0	0	0	0	0	0	0	0	0	0	0	0	0	0
AC005288.1	4.7132	8.2257	8.9793	3.3908	6.5264	13.8853	0.4561	8.3358	9.9886	6.3761	3.9127	4.8464	4.9504	9.0805	4.8021	8.6338	4.9452	2.6777	13.6294	6.0894	8.5224	7.8076	10.2488	7.3358	10.3685	5.6737	10.9542	11.6419	8.2698	9.4466	6.9599	11.155	1.8703	3.1659	8.6124	11.5074	6.4272	2.1032	7.4872	11.6384	2.4084	1.9805	5.3848	2.3466	9.1516	7.7594	7.6254	8.8498	0.9069
SMCO1	0.0128	0	0	0.5303	0.0147	0.0199	0.0467	0.0139	0.0094	0	0.0624	0.0058	0.0056	0.0088	0.0192	0	0.0515	0.2483	0.0271	0.0131	0.0236	0.0187	0	0.0072	0.0124	0	0.0082	0.0132	0.0195	0.0185	0.0206	0	0.0336	0.0563	0.0153	0	0	0.0839	0.015	0.0135	0	0.0105	0.1728	0	0.0225	0.0294	0	0.0168	0.1285
METTL7AP1	0	0	0	0	0	0	0	0	0	0	0	0	0	0	0	0	0	0	0	0	0	0	0.0236	0	0	0	0	0	0	0	0	0	0	0	0	0	0	0	0	0	0	0	0	0	0	0	0	0	0
AL356273.3	0.547	0.4169	0.3929	0.2736	0.5049	0.281	0.1315	0.2093	0.6296	0.7094	0.268	0.1361	0.1845	0.3045	0.158	0.0987	0.1856	0.2412	0.3651	0.2516	0.5312	0.8425	0.5362	0.6602	0.9118	0.1865	0.3466	0.3834	0.4115	0.5373	0.4768	0.4127	0.2906	0.3584	0.3946	0.2537	0.2316	0.1698	0.2674	0.8545	0.226	0.3937	0.503	0.1598	0.0423	0.5472	0.38	0.34	0.0402
AC022035.1	0.3563	0.1168	0	0	0.0456	0.1851	0.0722	0	0.2336	0.2366	0	0.5735	0.2778	0.0542	0.0892	0.4874	0.0531	0.053	0.1119	0.0404	0.0729	0.6551	0.0388	0	0.308	0.1151	0.0507	0.0815	0	0.1522	0.1273	0.1132	0.0832	0.1935	0	0.0428	0	0.559	0.1391	0.0834	0.0647	0.0648	0.1603	0	0.0465	0.1456	0.0385	0.1041	1.5892
ZNF738	10.1778	28.4925	14.4821	4.4627	9.6737	17.7086	21.3792	11.268	20.7874	14.0971	17.1059	16.6253	12.731	18.8073	20.901	11.9907	13.0566	17.0195	15.1119	18.7405	10.7315	12.4297	13.4586	11.309	10.5539	24.1388	18.2993	16.8858	15.2176	10.3433	13.5029	8.9289	4.7819	19.6063	14.9472	8.1594	18.0177	12.4783	20.701	8.676	15.6169	18.154	16.7803	19.0728	14.2375	13.2063	15.1916	17.9114	23.9301
NCKIPSD	6.3321	5.3268	7.9757	10.9799	6.4914	9.4586	2.2993	7.9557	4.884	8.4128	6.1612	10.7437	8.9366	11.9148	8.4232	10.1913	15.6041	6.0173	7.1673	7.9412	6.5689	8.5404	7.5291	7.6786	7.5053	8.7255	9.206	5.7645	8.1325	9.5484	10.4784	7.0026	5.318	5.1871	6.8465	13.1438	9.985	5.69	9.2611	11.5992	3.0811	2.3909	6.1279	8.7118	6.1293	8.9044	9.4145	6.4348	1.1773
CD84	0.2571	0.1792	0.3924	0.7674	0.7373	0.2395	0.3791	0.2277	0.2744	0.2702	0.351	0.2281	0.1768	0.1557	0.1154	0.1484	0.1821	0.5028	0.146	0.0514	0.5161	1.3919	0.2064	0.4725	0.1382	0.2016	0.1092	0.3256	0.3439	0.1031	0.2631	0.4527	0.2077	0.2702	0.2313	0.4445	0.0643	0.5485	0.1694	0.0258	0.4117	0.3004	0.3382	0.0807	0.091	0.1865	0.1533	0.4333	0.2593
AC004217.1	0.0318	0.1175	0.204	0.0186	0.0733	0.0496	0.1161	0.0173	0	0.1665	0.0222	0.0144	0.014	0.0218	0.0598	0.0218	0	0	0.0225	0.0975	0.0293	0.0465	0.0468	0.0541	0.0619	0.1235	0.0612	0.0819	0.0242	0.0918	0.0171	0.0228	0.0167	0.0778	0.038	0.0345	0	0.0321	0.0186	0.0168	0.0781	0	0.1504	0.0212	0	0.0439	0.0464	0.0419	0
AC091044.1	0	0.1411	0	0	0.0734	0	0	0	0	0	0	0	0	0	0	0	0	0	0	0	0	0.031	0	0.0361	0	0	0	0.0328	0	0	0	0.0456	0	0	0	0.0345	0	0	0	0	0.1042	0	0.043	0	0	0.0293	0	0	0
LINC01300	0	0.0217	0	0.0344	0	0	0.5368	0	0	0.044	0.041	0	0	0.4032	0.0995	0.0201	0.4941	0.0197	0.0416	0.015	0	0.0143	0.0144	0.2668	0.1002	0.0571	0.0189	0.0151	0.0448	0.0849	0.0316	0	0.0155	0.6476	0.2285	0.0319	0	0.1485	0	0.0465	0	0.0241	0.1391	0.0783	0	0.0271	0.0286	0	0
GAPDHP65	0.2853	0.7891	0.8834	0.7212	0.4376	0.8889	0.3899	0.4268	0.7364	0.4261	0.9604	0.9685	0.8235	0.6835	1.2048	0.6503	0.9412	0.3656	0.5876	0.4732	0.5032	0.4164	0.6175	0.5787	0.5085	0.9217	0.8527	1.6139	0.6871	0.4912	0.4077	0.374	0.3872	0.4298	0.6384	0.6815	0.6105	1.1267	0.807	0.5381	0.3302	0.3308	0.7859	0.4581	0.4184	0.5792	1.1905	0.5002	0.1391
SLC22A9	0.0304	0.0075	0	0.0177	0.0582	0.0079	0	0	0.0149	0	0.0353	0	0	0.0069	0.0038	0.0138	0.0136	0.0203	0.0501	0.0103	0.0186	0.0246	0.005	0.0974	0.0049	0.0098	0.0065	0.0521	0	0.0097	0.0054	0.0796	0	0.0049	0.0121	0.0274	0	0	0.0059	0.0053	0.0083	0	0.6148	0	0.0238	0	0.0049	0	0
RF01946	0	0	0	0	0	0	0	0	0	0	0	0	0	0	0	0	0	0	0	0	0	0	0	0	0	0	0	0	0	0	0	0	0	0	0	0	0	0	0	0	0	0	0	0	0	0	0	0	0
AC021171.1	0	0.2749	0.0434	0	0.0585	0.0792	0	0.0737	0.025	0.0253	0	0.0767	0.0149	0.1159	0.0381	0.3012	0.0455	0.0453	0.0957	0.121	0.0624	0.0824	0.0664	0.0767	0.1976	0	0.0434	0.0871	0.0773	0.1628	0.0726	0.2422	0	0.0166	0.1213	0.1099	0.0544	0	0	0.0892	0.0277	0	0.1371	0	0.0397	0.0467	0.0823	0.0668	0
NMNAT3	2.0269	0.7463	1.2875	2.5471	0.9168	1.5061	0.0063	1.6588	0.0818	1.5993	0.0193	0.2729	0.1307	0.0901	1.5141	3.0141	0.665	0.5375	1.7521	0.2759	0.1913	0.8396	0.9136	0.1059	0.1819	1.911	0.0843	0.6594	1.8184	0.8125	0.0557	0.114	0.1056	0.2269	0.9883	0.8997	0.1112	1.81	0.4543	0.0292	0.419	1.9969	1.9965	0.244	1.0082	1.2679	0.5425	0.5149	0.0464
AL451048.1	0	0	0	0	0.0634	0	0	0	0	0	0	0	0	0	0	0	0	0.1474	0	0.0563	0.1014	0.1073	0	0.0624	0.2143	0	0	0	0	0.053	0	0	0	0.0538	0	0	0	0.0556	0	0.058	0	0.4511	1.7102	0	0	0	0	0	0
PDIA4	73.5721	66.845	54.0727	49.2451	48.4357	45.5643	46.9758	47.349	51.4852	51.6769	37.22	76.6457	59.7102	40.9113	78.1823	44.2532	48.5372	41.6065	52.797	51.4807	54.1344	39.1794	56.7652	61.0478	42.8095	54.7637	56.1725	63.9985	46.8805	57.6019	58.4018	70.4885	16.8189	34.3073	60.7076	62.7911	61.4367	71.077	51.2754	42.7337	62.7043	32.781	106.6274	33.0613	54.6183	59.9928	61.2277	53.3503	40.3728
AC007795.1	0	0	0	0	0	0	0	0	0	0	0	0	0	0	0	0	0	0	0	0	0	0	0	0	0	0	0	0	0	0	0	0	0	0	0	0	0	0	0	0	0	0	0.0369	0	0	0	0	0	0
SVIL	14.6352	8.6972	10.8087	32.8814	19.9434	7.3059	15.2591	21.6531	3.4809	9.39	15.2733	6.6902	8.6088	6.9822	9.3917	8.3494	5.3441	17.1278	6.734	8.2196	16.4724	9.4061	16.9388	10.1281	9.8169	10.1193	8.5092	29.7944	9.718	7.6784	8.4651	16.584	5.2809	5.7339	11.505	15.4971	13.91	15.0763	8.1167	9.5087	12.1326	14.9676	7.0294	3.2654	47.1178	6.6689	7.1927	7.9724	2.9904
RN7SKP101	0	0	0	0	0.086	0.1164	0	0	0	0	0	0	0	0	0	0	0	0	0	0	0.1376	0.0364	0	0	0	0	0	0	0	0	0	0	0	0	0	0	0	0	0	0	0	0	0	0	0	0	0	0	0
AC026422.1	0	0.039	0.2373	0.0926	0.0609	0.2061	0.0482	0.0864	0.5854	0.1976	0.2211	0.3353	0.0928	0.4709	0.1986	0.0724	0	0.2123	0	0.4321	0.0487	0.1802	0.2593	0.1198	0.1286	0.0769	0.3728	0.2449	0	0	0.1418	0.0378	0	0.1551	0.2526	0.0859	0.1274	0.0534	0.3097	0	0.1297	0.0433	0.1071	0.3867	0.2483	0.1459	0.3087	0.2783	0
AL137230.2	0	0	0	0	0	0	0	0	0	0	0	0	0	0	0	0	0	0	0	0	0	0	0	0	0	0	0	0	0	0	0	0	0	0	0	0	0	0	0	0	0	0	0	0	0	0	0	0	0
SLC7A6	1.5348	1.7344	2.1807	1.1695	1.7078	2.0574	1.2321	1.6117	0.9391	0.9934	1.2272	1.5423	1.6542	0.7228	1.4387	1.0626	0.5541	1.8546	0.4919	1.2645	1.0007	1.0536	2.147	1.1811	1.886	3.0991	1.1527	3.1479	0.5178	1.7067	0.956	0.7437	0.4322	0.6437	1.0852	1.444	0.946	0.6897	2.0698	0.7367	1.303	0.4773	2.1435	0.7183	2.1687	0.6259	1.3178	1.5957	0.1529
AC069545.1	0	0	0	0	0	0	0	0	0	0.1497	0.0465	0	0	0	0	0	0.0897	0	0	0.1705	0	0.0325	0.0982	0	0.1299	0.1295	0.0856	0	0.0508	0.0963	0	0	0	0	0	0	0	0	0	0.0352	0	0	0.2254	0.0444	0	0.0307	0.065	0	0
RNU6-893P	0	0	0	0	0	0	0	0	0.1764	0	0.1666	0.2165	0.1049	0	0.0898	0	0	0.1599	0.1689	0	0	0	0.2344	0.1354	0	0	0	0.369	0.1819	0	0	0	0	0	0	0.1294	0	0	0	0.3777	0	0	0.1614	0.1589	0	0.1099	0	0	0
RNA5SP328	0	0	0	0	0	0	0	0	0	0	0	0	0	0	0	0	0	0	0	0	0	0	0	0	0.1067	0	0	0	0	0	0	0	0.2306	0	0	0	0	0	0	0	0	0	0	0	0	0	0	0	0
IGKV1D-39	0.0954	0	0	0	0.1098	0	0	0	0	0	0.1772	0	0.0279	0.2612	0.0239	0	0.939	0	0	0	0	0.2166	0.0312	0	0	0	0.0407	0.0654	0.1451	0	0.0682	0	0	0.0622	0	0	0	0.7055	0	0	0	0.5728	0.0858	0.169	0.0373	0.0292	0	0	0.1064
AKR1B1P1	0.025	0.0369	0.0481	0.0146	0	0.039	0	0	0.0554	0	0	0.0226	0	0.0171	0.0094	0.0684	0.0336	0.0167	0.0883	0.0255	0	0.0243	0.0245	0.0142	0.1094	0.0121	0.0481	0.0515	0.019	0.012	0.0134	0.0715	0	0	0.0149	0.0812	0	0.0252	0	0.0263	0.0204	0	0	0	0.0147	0.092	0.0243	0.0493	0.0418
DLX2	0.0725	0.095	0.0103	0.0423	0.227	0.0251	4.5345	0.0131	10.9397	0.0241	0.1851	0.0182	0.0071	0.011	0.0725	0.0385	0.0324	0.5761	0.0114	0.0123	2.8012	0.0705	0	0.0365	0.0822	3.559	0.0103	0.0621	0.098	0.0426	0.0173	1.3127	0.0127	0.0984	2.1238	0.0174	0.0258	0.5562	0.0094	0.0254	0.4474	0.0659	0.0761	0.0054	0.0614	0.0481	0.0274	0.0053	0.1077
RDM1	0.6659	1.2684	0.993	0.1554	0.4388	0.698	1.2799	0.6588	1.3039	1.5917	2.2942	1.9349	2.3308	1.2351	1.841	1.0434	0.9913	0.8097	1.9925	2.4847	1.003	1.1431	1.0623	1.4121	0.7181	1.4084	1.3573	1.6939	0.7276	0.7971	0.7982	0.8399	0.4199	1.1064	0.8599	1.7161	1.8658	0.6777	1.1907	1.6702	1.207	0.5452	1.4706	0.9494	1.8682	1.4918	1.5778	1.3376	1.0226
TBCD	5.6271	8.6344	7.5478	3.501	7.5455	6.5779	4.3742	6.8856	6.279	6.5098	6.7463	4.8231	5.7354	5.6501	5.625	6.9411	7.1404	3.4448	8.5844	6.5839	5.3781	7.5968	7.4914	8.1703	6.272	4.7478	6.2919	8.1947	6.9879	8.3667	7.9148	5.6984	2.6188	3.1694	5.6164	10.0657	8.7688	3.8189	6.0265	10.9839	3.5024	2.1361	4.8135	3.2248	6.0214	8.4679	6.83	7.4608	0.6333
H3F3C	0.4412	0.968	0.4349	0.2904	0.5596	0.282	1.4432	0.4185	0.4839	0.3718	0.331	0.7989	0.2183	0.666	0.5096	0.9129	0.8047	0.3328	1.0067	0.3927	0.3748	0.3413	0.5655	0.3586	0.308	0.2522	0.8985	1.0706	0.2753	0.4457	0.7518	0.3883	1.0581	0.8513	0.405	0.9301	0.2179	0.5362	0.4635	0.3931	0.8689	0.5001	0.5954	0.4059	0.9291	0.4784	0.605	0.4166	0.5108
AC011447.3	0.1233	1.2833	1.1063	0.1401	0.4966	1.2945	0.2366	0.618	1.0725	0.6206	0.9496	0.6259	0.6034	0.8977	1.0967	0.8257	0.5576	0.4688	0.9765	0.8251	0.8125	0.916	1.9153	0.8526	0.8079	1.0885	1.0811	1.3722	0.9628	0.7891	0.9115	1.3461	0.1399	0.2696	1.6774	0.6812	1.4327	0.4517	0.6801	0.8134	0.4455	0.2657	1.0599	0.8066	0.8644	0.5312	1.3067	1.0415	0.342
KRT1	0.0192	0.0213	0.0062	0	0.0166	0.0075	0	0.0157	0.0142	0.0215	0.0335	0	0	0.0066	0.0072	0.539	0.0129	0	0.0068	0.0049	0	0	0.0047	0	0.0514	0	0	0.3461	0.0585	0.0092	0	0	1.0556	0	0	0.0104	0	0.0242	0.0056	0.0051	0.0157	0.0236	0.013	0	0.0056	0	0	0.0063	0
AL359397.1	0.4773	1.4085	0.5199	0.362	0.1098	0.7065	0.174	0.1558	0.3873	0.2496	0.532	0.2809	0.8791	0.2287	0.3405	0.1959	0.5446	0.1915	0.1011	0.6335	0.615	0.1858	0.4445	0.2162	0.6265	0.1851	0.4892	0.4419	0.1815	0.6651	0.1535	0.3072	0.7776	0.3965	0.0285	0.0775	0.4214	0.1925	0.2235	0.1005	0.195	0.1563	0.5797	0.0317	0.28	0.5486	0.2321	0.1883	0.1197
IGBP1	69.8397	54.3638	43.2416	39.3102	45.0304	56.9685	40.6584	66.8341	78.3145	64.3667	57.7304	60.9427	103.7853	57.3707	42.0111	49.4596	69.4256	61.1238	55.5847	75.8519	70.0009	37.3046	37.5038	58.5224	27.7967	49.6468	55.1763	58.1893	47.1829	47.3523	38.9533	54.304	83.5633	70.5264	30.3739	48.7303	44.6414	54.8649	61.7873	28.9326	53.9079	68.3015	42.7049	67.471	70.711	95.511	41.6827	52.2163	64.148
ZNF341	0.837	1.0636	1.3617	0.6341	1.5428	1.1163	0.3514	1.0538	1.4998	0.9361	0.7357	1.0455	1.0876	1.248	1.1286	0.6444	1.294	1.3304	1.0771	1.369	1.448	1.2432	1.0567	1.5307	1.4402	1.2807	1.3221	1.4921	0.9866	1.1118	1.2049	1.3381	0.5527	0.9658	0.9624	1.5053	0.9355	0.674	1.2184	1.6127	0.5801	0.4556	0.686	1.1502	1.216	1.4646	0.9908	1.1325	0.1136
AC013269.1	0	0	0	0	0	0	0	0	0	0	0	0	0	0	0	0	0	0	0	0	0	0	0	0	0	0	0	0	0	0	0	0	0	0	0	0	0	0	0	0	0	0.0808	0	0	0	0	0	0	0
OFD1P11Y	0	0	0	0	0	0	0	0	0	0	0	0	0	0	0	0	0	0	0	0	0	0	0	0	0	0	0	0	0	0	0	0	0	0	0	0	0	0	0	0	0	0	0	0	0	0	0	0	0
ABHD8	14.7322	6.6095	9.9141	7.2036	9.2126	10.2335	3.047	14.129	8.7636	12.1232	15.5047	15.1707	11.3971	18.542	15.2869	12.3068	11.6624	13.2419	8.2919	14.875	12.4091	7.1665	9.5463	9.1704	6.1442	9.3507	10.4731	9.6895	10.6749	11.1426	10.9843	9.3781	12.0374	13.499	7.6328	16.15	8.997	8.419	10.0075	16.6974	5.1723	7.1047	8.3526	14.1865	11.0329	10.7199	10.1911	11.5268	1.9545
TAF9B	17.4146	32.0968	21.4208	17.0521	28.7011	20.3247	14.0622	17.0427	23.2827	19.5318	19.7974	17.6835	18.3685	17.6385	14.3113	21.4001	14.3177	14.1581	33.2767	23.6095	27.5615	22.4151	18.3811	26.0674	41.6749	18.4586	25.3618	29.0417	20.2618	30.2857	25.9875	29.8566	9.1624	16.7598	28.3939	14.3408	31.3707	21.0838	21.3402	21.7201	34.0181	21.1421	17.0549	26.5659	21.6947	59.3829	26.9877	24.6042	17.8191
AL513327.2	0.122	0.216	0.2502	0.1424	0.1965	0.4562	0.2668	0.2124	0.108	0.1458	0	0.1326	0.428	0.2673	0.1649	0.1001	0.2293	0.1958	0.0689	0.4235	0.0898	0.285	0.4066	0.3868	0.261	0.1892	0.1876	0.1506	0.0742	0.2345	0.1569	0.1047	0.2052	0.0954	0.233	0.1584	0	0.0246	0.4571	0.2826	0.3988	0.04	0	0.1946	0.1145	0.2468	0.2848	0.2567	0.1632
RNU6-1009P	0.1117	0	0.1432	0	0.1286	0	0	0	0	0	0	0	0	0	0	0.4585	0	0	0.1578	0	0	0	0.1095	0	0	0.1083	0	0.115	0	0.2148	0	0	0	0	0.1334	0	0	0	0	0	0	0	0.3016	0	0	0	0	0	0
WWP1	4.597	4.1709	5.9923	7.6083	5.784	8.5855	6.8307	5.5093	4.0868	6.5966	5.9365	5.0541	4.8756	4.6794	3.269	8.7453	7.429	5.9211	13.1549	7.1131	6.9996	4.9075	3.7867	8.6323	7.6	4.4615	6.9192	4.2863	6.5167	7.2272	6.9445	10.7552	5.4144	6.9456	7.4554	7.6279	4.4134	7.8372	4.0009	15.6183	3.9259	5.2096	3.247	5.9163	4.7074	8.5193	4.7934	6.696	4.0935
AC096922.1	0	0	0	0	0.0211	0	0	0	0.0271	0	0	0	0	0	0	0	0	0	0	0	0	0	0	0	0	0.0178	0.0235	0.0378	0	0	0	0.0263	0	0	0	0	0	0	0.0215	0	0	0	0.0248	0	0	0	0.0179	0.0242	0
IGBP1P3	0.012	0	0.0153	0.0279	0.0138	0.0186	0	0	0	0	0	0	0	0.0164	0.018	0.0164	0	0.032	0.0169	0	0	0	0	0.0135	0	0	0	0.0615	0.0364	0	0	0	0.0126	0.0117	0.0143	0.0129	0	0.0121	0	0	0	0	0.0484	0	0.0281	0.033	0	0.0157	0
PF4V1	1.2369	0.3717	0.1468	0.4277	0.5271	0.0714	0.5427	1.4955	0	3.1138	0.6701	1.2443	0.4419	0.7527	1.8231	0.1567	0.1845	0.0613	0.1941	0.0234	3.6261	0.0892	1.2125	0.0259	0.0668	0.7993	0.0587	0.7304	0.453	0.1981	1.154	1.3431	0	0.3358	0.3554	0.4709	0	0.9471	1.5285	0.0482	0.8984	1.7252	0.1855	0.0913	1.6125	0.5476	0.0223	0.1205	0.8811
RF00003	0	0	0	0.1691	0.1667	0.2258	0	0.0789	0	0.3248	0.101	0	0.0636	0	0.1632	6.7402	0	0	0.2047	0	0	1.199	0	0.4102	0.2114	0.1405	0	0.0745	0.1102	0.0696	0	0	0	0	0.346	0	1.1632	0	0	0.6867	0	0.5933	0.1956	0	0	0	0.1409	0	0
PFKFB4	0.6696	1.0861	1.3849	0.2879	1.2074	1.2141	1.3667	1.2719	0.3899	1.0207	0.6492	5.6832	2.3404	4.8468	2.0626	2.0942	7.1032	0.5028	1.3385	1.789	0.4901	1.2157	3.1744	1.1173	0.8757	1.5164	3.7624	1.724	2.1802	1.7405	2.9655	0.6804	1.7264	1.8465	1.2362	1.6353	1.7976	2.3674	2.8307	2.4388	0.8255	0.5963	1.1731	2.1207	0.8706	1.5085	4.7694	1.1947	0.2128
AC020908.3	0.3136	1.07	0.1758	0.0229	0.2481	0.0305	0	0.0213	0.2313	0.5271	0	0.2662	0.1203	0.161	0.1766	0.2145	0.2368	0.2622	0.1384	0.1401	0.3247	0.1335	0.0769	0.1332	0.2287	0.171	0.1004	0.1613	0	0.0188	0.1051	0.0841	0.0618	0.0383	0.0702	0.0848	0.0315	0.1384	0.2983	0.1651	0.1602	0.1926	0.3703	0.1042	0.046	0.036	0.0762	0.2062	0
MGC16275	0.256	0.0909	0.2066	0.2268	0.6436	0.0813	0.0259	0.325	0.042	0.2975	0.1123	0.103	0.0748	0.1623	0.0605	0.1556	0.2609	0.3361	0.2612	0.092	0.6633	0.2492	0.1069	0.2577	0.3596	0.216	0.0668	0.2487	0.3173	0.1276	0.0559	0.5967	0.7424	0.0741	0.0736	0.1231	0.0152	0.1339	0.1221	0.3544	0.1395	0.0388	0.096	0.0315	0.0556	0.1395	0.0599	0.2182	0.0079
RF00019	0.6349	2.8101	0.5424	0.4939	0.8522	1.3189	0.3857	0.4605	2.9658	0.3161	0.5897	1.5328	0.8352	1.5937	0.1589	1.0131	0.9942	1.2737	0.8968	3.2408	1.753	1.1328	1.0372	0.9585	0.4115	1.7436	0.5422	0.6531	0.3219	0.7118	0.2268	1.0593	1.0008	0.8273	0	0.6869	0.5095	1.2805	1.2387	1.1142	0.5188	0.3465	0.5712	0.8437	0.7449	1.362	0.1029	0.6958	0
LINC01616	0	0	0	0.0061	0.1327	0	0	0.0685	0.0077	0.0235	0.0073	0.0047	0	0	0	0	0.0141	0	0	0	0	0.0664	0	0	0.0051	0.0102	0	0.0216	0.008	0.0101	0	0.015	0	0.0154	0	0.0113	0	0.0582	0	0	0	0.0172	0.0071	0.0139	0.0062	0.0145	0.0153	0	0.0088
RF00092	0	0	0	0	0	0	0	0	0	0	0	0	0	0	0	0	0	0	0	0	0	0	0	0	0	0	0	0	0	0	0	0	0	0	0	0	0	0	0	0	0	0	0	0	0	0	0	0	0
HIST3H3	0.0497	0.0367	0.1593	0.058	0.0286	0.1162	0	0.0541	0.0367	0.0371	0	0.1125	0.0218	0.1361	0.0933	0.102	0.0667	0	0.0351	0.1777	0.0915	0.0726	0.1462	0.1689	0.3384	0.1205	0	0.1534	0	0.1672	0.1066	0.1067	0.0261	0	0.0297	0.2421	0	0.0501	0	0.2094	0	0.0407	0.1006	0	0.0292	0.0457	0	0.0327	0
AL353784.1	0.0156	0.092	0.0866	0.0243	0.0299	0.0567	0	0	0.0153	0.1165	0.1086	0.1742	0.1049	0.242	0.0781	0.0711	0.0907	0.1391	0.0955	0.4193	0.2105	0.1113	0.1019	0.0412	0.0152	0.0605	0.0067	0.0963	0.0712	0.045	0.039	0.0074	0	0.254	0.1551	0.045	0.0751	0.0682	0.1765	0.0766	0.1189	0.1192	0.1614	0.0967	0.0793	0.0335	0.0303	0.2393	0.0261
LINC01594	0.2153	2.4253	0.9529	0.0457	0.4503	0.3964	0	0.0426	1.7033	0.7893	0	0.1949	0.738	0.9646	0.4555	0.2409	1.2608	0.9946	1.0504	4.0557	1.2608	1.676	0.633	0.1551	3.0253	0.1518	0.6017	0.3422	0.1191	1.0156	4.0486	1.4833	0.3291	0.7076	1.2379	0.2329	0.6282	0.0987	0.5269	2.5757	0.2239	0.3845	1.3468	6.3718	0.1378	1.8892	3.3303	0.2316	0.5237
MIR4303	0.5435	0	0	0	0	0	0	0	0	0	0	0	0	0	0	0	0	0	0	0	0	0	0	0	0	0	0	0	0	0	0	0	0.1904	0	0	0	0	0	0	0	0	0	0.7334	0	0	0	0	0	0
GCSH	3.8987	6.3996	6.471	8.2528	7.8149	8.0661	11.9161	4.7198	9.3074	4.5984	7.6999	7.9062	10.8542	3.8229	6.1413	7.1596	3.2695	7.2473	3.5127	11.0968	9.5532	3.8439	4.8379	5.2136	4.9223	2.3057	6.6161	7.0462	2.2253	7.7197	3.3815	9.4597	4.7257	4.5063	2.4063	5.8351	9.4022	4.1819	6.5522	3.0671	10.8197	5.1756	7.2868	3.2626	7.6041	3.7659	6.6239	5.3866	6.4459
OR4K14	0	0	0	0	0.0147	0	0.0233	0	0	0	0	0	0	0	0.0096	0	0	0	0	0	0	0	0	0	0	0.0248	0	0.0132	0	0	0	0	0	0	0	0	0	0	0.03	0	0	0	0.0173	0	0	0	0	0	0
LINC01259	0	0	0	0	0	0	0.0288	0	0	0	0.022	0	0	0	0	0	0	0	0.0223	0	0	0.0154	0.031	0	0	0	0	0.0325	0	0.0152	0	0.0226	0.0166	0	0	0	0	0	0.037	0.0166	0	0	0	0	0	0	0	0	0
AC092958.2	0	0	0	0	0.0559	0	0	0	0	0	0	0	0	0	0	0	0	0	0	0	0	0	0	0	0	0	0	0	0	0	0	0	0	0	0	0	0	0	0	0	0	0	0	0	0	0	0	0	0
AC116165.1	0	0	0	0	0	0	0	0	0	0	0	0	0	0	0	0	0	0	0	0	0	0	0	0	0	0	0	0	0	0	0	0	0	0	0	0	0	0	0	0	0	0	0	0	0	0	0	0	0
OTOF	0.3336	0.0157	0.0253	0.2283	0.2355	0.0118	0.0138	0.0429	0.0022	0.034	0.0634	0.022	0.0306	0.0747	0.0307	0.0311	0.0326	0.2048	0.0193	0.0387	0.0167	0.0472	0.0268	0.0223	0.0221	0.047	0.0175	0.0421	0.0554	0.0117	0.0146	0.026	0.0845	0.0104	0.0036	0.0443	0.0097	0.156	0	0.0367	0.0124	0.0596	0.3377	0.0161	0.0107	0.0139	0.0177	0.016	0
AL356458.1	0	0	0.033	0	0.0296	0	0	0	0	0.0768	0	0	0	0	0	0	0	0	0	0	0	0	0	0	0	0	0	0.0265	0	0	0	0	0	0	0	0	0	0	0	0	0	0	0	0	0	0	0	0	0
CSN1S1	0.0486	0	0.0156	0.0992	0.0838	0	0	0.0132	0	0	0	0	0	0	0.0091	0.0332	0	0	0	0	0	0	0.0119	0	0	0.0118	0	0.0375	0	0	0	0	0	0	0	0	0	0.0122	0.0568	0	0.0992	0	0.0491	0	0	0	0	0	0
AP000487.2	0.1214	0.7612	0.2333	0.0354	0.0349	0.0473	0.5531	0	0.3134	0.136	0.2537	0.4396	0.0532	0.1662	0.2279	0.3321	0.1222	0.3247	0.3429	0.2788	0.1676	0.2363	0.238	0.1718	0.118	0.2647	0.0778	0.2185	0.0462	0.1458	0.1627	0.217	0.0638	0.2373	0.1087	0.2955	0	0.0918	0.2842	0.0959	0.0992	0.4472	0.2867	0.121	0.2492	0.2511	0.4427	0.2794	0
AC024651.2	0	0	0.0146	0	0.0262	0.0089	0.0104	0	0	0.0085	0	0	0.01	0.0156	0	0	0.0076	0	0	0.0175	0	0	0	0	0.0111	0	0	0	0.0087	0	0	0	0	0	0.0476	0	0	0	0	0	0	0	0	0.0227	0	0.0157	0.0166	0.0075	0
ATOH7	3.0215	4.4818	8.0025	0.2263	0.4369	6.6587	0.4123	1.2307	0.8462	3.1861	0.7541	16.8165	1.8847	6.2942	1.8077	1.0166	3.1121	5.7051	3.2295	4.8828	0.8923	5.677	1.18	3.5309	3.3856	2.7566	4.3056	0.3241	9.9181	12.4382	0.6755	0.5315	0.5689	16.8096	1.1185	0.6468	0.7392	0.3178	1.135	1.2845	1.3335	9.2201	2.8783	16.9858	0.5972	23.2423	5.1695	4.9193	2.1348
PHLPP2	0.5723	1.7976	1.6238	0.3563	2.3675	1.4494	1.3554	1.2237	1.3088	0.3689	0.456	1.0329	0.6312	0.3695	0.5893	0.9897	0.5215	1.1392	0.6165	1.6025	1.6684	1.726	1.5095	1.3524	1.6834	0.4481	1.4714	1.3114	0.3654	1.5305	0.9336	2.6117	0.4546	0.7932	0.851	0.9237	0.9863	0.2345	0.9289	0.6057	1.1871	0.3181	0.8834	0.5139	0.6951	0.9671	1.5785	1.5897	0.1745
DYRK1B	19.6395	14.9221	33.4756	23.6303	18.3809	29.7065	2.5602	26.7505	28.5252	30.2448	35.2886	27.685	22.8316	38.3079	29.8252	16.7237	29.2312	36.2567	28.6412	29.2978	27.2019	23.4453	26.0522	32.361	24.73	25.5766	35.1375	19.2819	39.9061	26.895	38.4709	27.8951	8.1885	29.4331	20.8701	31.9681	21.1585	28.2306	33.8412	36.7602	4.8115	10.4881	17.1163	41.4091	22.6787	20.7195	21.929	35.7996	2.7377
AP001085.1	0	0.0276	0.024	0	0.0215	0	0.0341	0	0.0552	0.028	0	0	0	0.0512	0	0	0	0	0	0.0573	0.0344	0.0364	0.0183	0	0.0182	0.0181	0.024	0	0	0	0.0201	0.1338	0.0197	0.1097	0.0223	0.0202	0	0	0	0	0.1223	0.0306	0.1768	0.0746	0.0659	0.0172	0	0	0
Z92544.2	0.757	0.4269	1.0649	0.263	0.6542	1.4677	0.0552	0.7175	1.1614	1.0202	0.2719	0.9869	0.8497	1.3773	0.7503	0.9112	1.156	0.504	0.9077	1.0029	1.1767	1.1395	1.0355	0.3924	0.1734	0.4207	1.3792	0.924	0.6397	0.9506	0.898	0.9479	0.4243	0.4702	0.7107	0.6188	0.8154	0.2579	1.0319	0.8892	0.3024	0.1873	0.6084	0.7064	1.0263	1.6085	0.8735	1.2875	0.2813
RF00432	0	0.63	0	0	0.0983	0	0	0	0	0	0	0.0773	0	0	0	0	0	0	0	0.0872	0.1572	0.0831	0	0	0	0	0	0	0	0.0821	0	0	0	0	0	0	0	0	0	0	0	0	0	0	0	0	0	0	0
E2F3P2	0	0.1241	0.0539	0	0.0871	0.0524	0	0.0457	0.0868	0	0	0.0533	0.0295	0	0.0189	0.023	0.0903	0	0.0594	0.0858	0.1857	0.09	0.0659	0.0476	0.1553	0.0245	0.0754	0.0692	0.0512	0.097	0.027	0.0962	0.2651	0	0.0703	0.0546	0.027	0.0254	0.0197	0.0797	0.0137	0	0.1362	0.1006	0.0395	0.0155	0.0736	0.0442	0.0141
NREP	96.7591	193.3808	186.5443	48.9904	177.9609	170.978	30.7545	147.3999	176.9472	149.4767	96.4797	152.5203	174.4956	189.9093	133.969	74.6764	128.4721	106.0223	176.087	120.3938	215.2084	129.7954	186.4607	126.205	107.4062	236.5157	208.9455	169.6066	172.8837	197.9192	162.9676	103.8838	141.3602	137.0193	169.1773	180.2215	148.7312	116.2456	165.8657	68.1642	130.2103	121.0167	116.9227	220.3868	292.9013	173.0016	165.6783	215.1965	71.2743
RASL11A	0.8761	4.7471	1.6133	0.3265	0.8301	3.9576	0.1476	0.1682	21.1907	6.2031	2.072	3.6997	9.5046	2.0968	2.2611	4.1995	3.5477	1.5164	14.6535	2.1347	21.2508	6.4634	1.0032	20.8991	9.1774	2.2766	7.9797	1.4693	1.5792	7.0969	11.0964	9.3293	22.8807	13.4051	2.3902	0.8364	1.0045	1.292	2.6461	2.287	6.1844	4.0988	5.7727	1.9668	0.7602	2.0308	4.0166	2.6918	3.0784
LINC01195	0	0	0	0	0.061	0	0	0	0	0	0	0	0	0	0	0	0	0	0	0	0	0	0	0	0	0.0257	0	0.0273	0	0	0	0	0	0	0	0.0287	0	0	0	0	0	0	0.2504	0	0.0622	0	0	0	0
MAGEB6	0.0061	0	0.0079	0	0	0	0.0224	0	0	0	0.0256	0	0	0	0	0	0	0.0082	0	0	0	0	0.006	0	0	0	0	0.0063	0	0	0	0	0.0064	0	0	0.0066	0	0	0	0	0.0201	0	0	0	0	0.0056	0	0	0
WDR12	3.1988	3.4476	3.9593	3.4859	3.8678	4.6747	5.2816	3.1818	3.7806	1.8572	5.0077	3.4103	4.4754	6.1596	3.3857	4.3305	3.3797	3.4117	4.5315	4.417	3.3917	2.7193	3.5969	3.1561	3.3543	3.3988	4.2058	4.8993	3.4907	4.1149	4.346	3.2742	2.7983	5.013	3.0807	3.1054	4.6873	3.0749	4.288	6.4763	4.8195	3.8863	5.8385	3.5491	4.2822	4.0153	4.0079	3.8958	3.2134
MOB3C	2.6961	0.4383	2.9033	0.9552	1.8603	2.1507	0.7404	3.3648	0.5277	1.3707	0.6251	1.0943	1.3365	1.4833	0.865	0.4783	1.0959	2.5409	0.7565	2.0964	1.8527	1.2707	1.7534	1.5332	0.8136	1.3675	0.7146	1.6882	1.7187	1.7073	0.6174	2.5899	1.5973	0.9481	0.8322	2.436	0.2109	0.748	2.0916	1.079	1.0107	1.327	1.1483	0.6554	0.9154	1.1967	0.9395	1.648	0.2197
AC090651.1	0.0566	0.0557	0.0483	0.066	0.1519	0.0294	0	0.0205	0.0556	0	0.0788	0.0171	0	0	0.0283	0	0.1013	0	0	0.0193	0	0.0184	0	0	0.0367	0.1645	0	0.1552	0.0287	0	0.0202	0.0539	0.0396	0.0369	0.0225	0.0612	0.0605	0.0571	0	0.0397	0.0308	0	0.1018	0	0.0221	0	0.0367	0.0248	0
C1QBPP2	0.1594	0.3635	0.3157	0.0676	0.2334	0.3613	0.1057	0.0789	0.171	0.3248	0.101	0.3281	0.3813	0.4167	0.2612	0.3965	0.1556	0.3877	0.7984	1.2281	0.2935	0.5219	0.2131	0.3118	0.155	0.576	0.2971	0.164	0.022	0.1671	0.0311	0.1658	0.0457	0.5241	0.3806	0.2822	0.1163	0.0731	0.1866	0.1679	0.6395	0.4746	0.3521	0.1541	0.085	0.1599	0.0987	0.5718	0.1454
MLLT3	0.3868	0.638	0.3732	12.7563	10.9542	0.0321	5.2865	5.4001	7.4145	0.8416	4.8976	0.6193	0.0374	0.0705	2.6473	0.3642	0.7206	2.9292	0.6545	0.0586	4.1074	0.4452	1.0742	2.8146	0.4677	6.7253	2.1199	12.2695	2.5061	0.7534	6.7561	5.3369	4.5139	1.0048	4.2046	1.8651	0.0472	6.6604	3.6747	7.0965	7.615	2.6131	1.2763	4.3768	30.5832	0.1447	0.7495	0.2631	1.3309
SLC25A16	2.1022	1.544	1.5665	1.3051	1.9398	1.4112	2.3953	1.0954	2.625	3.0878	1.3684	1.5168	1.3015	1.8686	1.7979	1.218	1.1048	2.1261	1.7397	2.5195	3.0417	2.2247	1.3783	1.197	0.9907	1.7218	1.6132	1.7517	1.3709	1.7247	1.3481	1.919	1.9939	3.4899	1.8919	1.5544	1.4563	1.0662	1.5583	1.4918	2.8379	2.6004	3.3758	2.501	1.1022	2.2662	1.159	1.5795	2.2978
RF00019	0	0	0	0	0	0	0	0	0	0	0	0	0	0	0	0	0	0	0	0	0	0	0	0	0	0	0	0	0	0	0	0	0	0	0	0	0	0	0	0	0	0	0	0	0	0	0	0	0
AC010768.1	0	0	0	0	0	0	0.1204	0.0479	0.065	0	0	0	0	0	0	0	0	0	0	0	0.0405	0	0.0216	0	0.0214	0	0.0282	0	0	0	0	0.0315	0.0231	0	0.0263	0	0	0	0.0516	0	0	0	0	0	0	0	0	0	0
RF00019	0	0	0	0	0	0	0	0	0	0	0	0	0	0.1502	0	0	0	0	0	0	0	0	0.1075	0	0	0	0	0	0	0	0.1176	0	0	0	0	0	0	0	0	0	0	0	0	0	0	0	0	0	0
UPK2	1.1027	0.319	0.1801	1.3246	0.8334	0.3706	0.3744	0.3764	0.4306	0.1615	0.1356	0.2251	0.2844	0.2516	0.414	0.0296	0.1741	0.7374	0.0611	0.6512	0.6567	0.1157	0.0636	0.1714	0.0631	0.4401	0.2216	0.5116	0.1316	0.239	0.0927	0.2474	0.2613	0.1902	0.3613	0.5731	0.2776	0.8831	0.2911	0.0797	0.1767	0.2655	0.3793	0.1437	0.5074	0.2684	0.2733	0.3697	0
MT-ATP6	6337.1789	1485.9036	2568.9737	4131.0063	3921.949	1765.6283	1173.5112	2743.9664	2849.7982	8077.9984	4439.9061	3389.3135	1724.7077	3655.0556	4732.306	2083.7089	2754.7535	7836.8151	2274.5008	4949.1509	3515.6435	3514.1322	2220.465	3895.1555	3784.2428	4286.3308	3868.88	3294.1287	2573.568	2138.6801	3644.4368	2764.7484	5910.5702	4374.4296	3554.5888	2797.3964	1599.0556	2904.5606	3489.87	2516.9442	2551.0646	3076.5912	5003.8587	2512.3232	2189.3757	2916.5498	2599.0667	2689.7801	1044.2611
PHBP16	0.0252	0.0371	0.0161	0	0.029	0.0196	0	0.0137	0.0186	0	0	0	0	0	0	0	0	0	0	0	0.0695	0.0122	0.0123	0.0143	0.0122	0	0	0.0388	0	0	0	0.018	0	0	0	0.0272	0	0	0	0	0	0	0.017	0	0	0.0463	0.0122	0	0
RNU6-199P	0.5587	0	1.4319	0.1304	1.0285	0.6964	0	0	0	1.5024	0	0.3035	0	0.612	0.1678	0	0.15	4.3342	2.9991	1.369	2.057	0.7613	0.2191	0.6326	0.5433	0.9749	0.1432	1.1495	0.34	0.4296	0	0.4794	1.057	0	0.8002	0.7254	0	0	1.9623	0	0.1826	1.8297	0.4524	0.4455	0	0.1027	0.2173	0.7348	0
CLTRN	0.5759	1.744	1.1652	0.2829	1.3338	1.5702	2.7758	0.6266	1.8891	1.6186	0.6228	1.5779	1.5882	1.8363	1.1322	1.2748	0.8238	1.1249	1.4235	2.6843	2.4688	0.7964	2.3843	1.1925	0.803	0.8814	2.1744	1.7538	0.9337	1.4273	0.6904	2.2324	1.4892	1.7698	1.1124	1.7872	1.5811	1.0316	0.9669	1.1808	2.0803	1.464	1.4622	2.1147	0.9957	1.4282	1.4295	1.4549	2.4331
AC135983.1	0	0.4181	0.1397	0.0509	0.0376	0.0679	0	0.0593	0.2251	0.0163	0.0152	0.0197	0.0574	0.0448	0.0491	0.1491	0.0146	0	0.0616	0.1113	0.0803	0.0318	0.0748	0.0247	0.0424	0.0634	0.0419	0.1009	0.0497	0.0943	0.0701	0.0624	0.2062	0.0107	0.026	0.0118	0.07	0.022	0.0383	0.0689	0.1069	0.0178	0.0441	0	0.0128	0.1704	0.0636	0.1003	0.0911
AL138752.1	0.2725	0.7036	0.6111	0.318	0.2352	0.3715	0.0621	0.556	0.603	0.458	0.1898	0.7711	0.2689	0.5597	0.1279	0.5591	0.3658	0.8201	2.1172	1.0086	0.7525	1.4588	0.3673	0.81	1.093	0.5283	0.2618	0.6658	0.7255	0.2946	0.3652	0.9257	0.2506	0.0666	0.6912	0.5528	0.2187	0.2061	0.2393	1.0043	0.9464	0.4462	1.3791	0.3169	0.5596	0.5951	0.5632	0.672	0.4558
ABL1	24.5993	30.7316	43.7852	16.7738	30.1085	46.2468	5.1112	51.876	37.2538	19.0142	25.0242	29.3119	28.5226	45.3451	24.8796	29.1681	40.6275	26.1125	41.6667	31.3794	35.722	55.3313	46.5803	46.8206	42.0772	32.7148	40.7261	34.4142	64.3844	35.6354	37.8525	43.9741	14.4183	22.989	46.5788	65.5518	32.5561	18.3815	32.4006	59.9088	6.6565	10.5594	18.3133	34.0346	34.0983	34.4046	50.9562	43.6142	1.9883
CLCN3	4.3526	8.168	7.6184	4.2341	15.7906	13.4164	5.0275	7.3661	9.7674	6.3482	3.6974	6.3958	6.9503	12.1713	5.135	7.2744	7.0354	7.4416	12.0179	8.7522	12.6076	8.4538	10.6299	7.5716	15.2079	7.7804	8.2917	11.0672	8.7532	9.9433	11.6904	13.5362	4.0516	8.4573	9.531	9.3292	7.9128	2.7789	6.8136	8.2952	7.7121	5.3096	6.5015	3.2767	12.5957	8.4356	8.5513	7.9582	2.3806
AC015911.2	0	0	0	0	0	0	0	0	0	0	0	0	0	0	0	0	0	0	0	0	0	0	0	0	0	0	0	0.0311	0	0	0	0	0	0	0	0.0327	0	0	0.0353	0	0	0	0	0	0	0	0	0	0
TGIF1	9.5442	10.1852	8.3019	6.7506	9.7913	8.1999	13.9865	13.7289	19.8058	6.6171	9.9741	9.0693	8.5067	10.3601	8.1786	5.2334	9.4589	13.4281	10.9015	6.4317	15.5316	6.5601	10.0372	16.1892	10.7108	15.4764	13.0116	8.9668	7.1258	7.034	6.1294	11.6865	12.8505	14.5321	8.1405	11.0295	7.0752	8.8949	11.6484	7.5537	13.2872	15.2465	9.7006	5.2666	20.5524	7.2082	12.3996	12.3569	8.8482
AC091515.1	0	0	0	0	0.0608	0	0	0	0	0	0.0981	0	0	0	0	0	0	0.0236	0	0	0	0	0	0	0	0	0	0.0725	0	0	0	0	0	0.0516	0	0	0	0	0	0	0	0	0.1901	0	0	0	0	0	0
DOCK8	0.7286	0.4774	0.8615	0.3543	0.498	0.5839	0.3447	0.4616	0.5899	0.4108	0.1559	0.3778	0.3918	0.1841	0.1811	0.3192	0.2457	0.6938	0.3651	0.4579	0.5365	2.7168	0.4337	0.4351	0.3972	0.4776	0.4223	1.7998	0.6928	0.4702	0.2641	0.7233	0.2407	0.3459	0.5218	0.9376	0.1295	0.2764	0.3514	0.5097	0.5415	0.3679	0.3699	0.136	0.399	0.5942	0.41	0.4483	0.2814
AC026719.1	0	0	0	0	0	0	0	0	0.0387	0	0.0365	0	0	0	0	0	0	0	0	0	0	0	0	0	0.0255	0	0	0.0539	0	0	0	0.0375	0	0.1025	0	0	0	0	0	0	0	0	0.1062	0	0	0	0	0	0
RF01964	0	0	0.7028	0	0.1262	0	0	0.1194	0.6473	0	0	0.0993	0.0962	0	0.4118	0	0	0	0	0.112	1.0096	0	0	0	0	0	0	0.1128	0	0.1054	0	0.1569	0.6917	0.1072	0	0.1187	0	0.3319	0.1284	0	0	0	0.148	0	0.2574	0.3026	0.2133	0.2885	0
AC010374.2	0	0.033	0	0	0	0	0	0	0	0	0	0	0	0	0	0	0	0	0	0	0	0	0	0	0	0	0	0	0	0	0	0	0	0	0	0.0242	0	0	0	0	0	0	0.0302	0	0	0	0	0	0
MIR3201	0	0	0	0	0	0	0	0	0	0	0	0	0	0	0	0	0	0	0	0	0	0	0	0	0	0	0	0	0	0	0	0	0	0	0	0	0	0	0	0	0	0	0	0	0	0	0	0	0
RN7SL455P	0.0424	0.0626	0.0543	0	0.0488	0	0	0.0461	0	0	0	0.0768	0	0.0581	0.1273	0.058	0.1707	0	0.1198	0.1299	0	0.0413	0.0416	0.288	0.0412	0	0.0543	0.0872	0	0	0	0	0.0446	0	0	0.0459	0	0	0	0	0	0.0694	2.0027	0	0.0497	0.039	0.0412	0.1673	0
RNU6-166P	0	0	0	0	0	0	0	0.1216	0	0	0	0	0	0	0	0	0	0	0	0	0	0	0	0	0	0	0	0.2299	0	0	0	0	0	0	0	0	0	0	0	0.1177	0	0	0.1508	0	0	0	0	0	0
AL353135.1	0.0237	0.07	0.0608	0.2215	0.0819	0.037	0	0	0.07	0.1772	0.0661	0.1504	0.1664	0.1624	0.1781	0	0.0318	0.3808	0	0.1695	0.1747	0.0462	0	0.0806	0	0.046	0.0912	0.0976	0.0722	0.0684	0.0509	0.0339	0.3989	0.1391	0.1133	0.1283	0.0381	0.0957	0.0555	0.05	0.0775	0.2719	0.032	0.0946	0.0557	0.0218	0.0231	0.156	0.0794
AP006285.2	0	0	0.0782	0	0.0234	0	1.0748	0.0221	0.03	0	0	0.0921	0.0178	0	0.0153	0	0	0.0544	0	0	0	0	0	0	0	0.0591	0	0.0209	0	0	0	0	0.0214	0	0	0	0	0	0.0238	0	0.0665	0	0	0.054	0	0.0748	0.0198	0.0267	0
AC012557.1	0.9785	0.9817	1.7554	0.7764	1.0582	1.3111	1.3553	0.9369	2.3673	3.1864	1.8539	1.6655	0.738	0.9914	1.9102	0.8298	0.3415	1.9368	0.8016	1.6782	1.549	1.0285	0.7865	0.9971	1.1797	1.214	1.078	1.0468	0.9526	1.0156	1.2376	1.5673	2.0772	0.8989	0.8408	1.0586	0.5654	0.8092	1.1913	2.5139	1.4071	1.0254	0.8715	1.0923	0.4363	1.4034	1.6366	1.3125	0.8509
AL031587.5	0.3169	0.5057	0.5469	0.566	0.5654	0.6045	0.0707	0.3729	0.7059	0.4057	0.3153	0.7494	0.2495	0.4781	0.2913	0.398	0.5815	0.4584	0.4385	0.8781	0.6666	0.5916	0.729	0.5565	0.7419	0.3698	0.6959	0.459	0.305	0.5345	0.6031	0.9063	0.401	0.2149	0.5248	0.4898	0.5605	0.2087	0.4164	1.2256	0.1479	0.0847	0.3578	0.4813	0.2352	0.6243	0.5471	0.7059	0.0324
AC022113.1	0.0214	0.685	0.119	0.05	0.0247	0.0556	0	0.0544	0.0211	0.0533	0.0398	0.1229	0.1503	0.088	0.0054	0.2247	0.1055	0.1337	0.2321	0.4813	0.0394	0.0278	0.21	0.1132	0.0486	0.0554	0.119	0.169	0.0326	0.0755	0.2067	0.2554	0.1126	0.1885	0.0597	0.0386	0.0344	0.0072	0.0669	0.2632	0.1868	0.0234	0.1542	0.0854	0.0838	0.0525	0.0417	0.1127	0.0478
AL513478.1	0	0	0	0	0	0	0	0	0	0	0	0	0	0	0	0	0	0	0	0	0	0	0	0	0	0	0	0	0	0	0	0	0	0	0	0	0	0	0	0	0	0	0	0	0	0	0	0	0
AC092920.1	0.0353	0.026	0.0226	0.6791	0.0812	0.0275	0	0.0192	0	0.0263	0.0246	0.016	0.0773	0.0241	0.0132	0.0241	0.0237	0.1887	0.0249	0.036	0.0325	0	0.0691	0	0.12	0.0342	0	0.0181	0.0537	0.0508	0.0189	0	0.0185	0.1379	0.021	0	0.1415	0	0.0413	0	0.0576	0	0.0238	0.1875	0	0.0324	0.0686	0.0464	0.0295
CTSB	73.2423	67.7007	47.9311	76.7132	62.4067	46.3551	44.3148	32.9185	127.2368	83.1109	76.2056	74.1959	70.1571	48.1382	61.1401	74.5014	89.0077	72.1626	79.5839	56.6379	124.4848	127.728	43.5787	153.9866	118.6073	65.8112	101.5327	57.6654	60.4255	113.9069	144.5979	137.3203	100.9527	94.3199	51.4013	92.2302	82.2782	60.9509	45.3119	72.1636	80.0379	43.1988	44.1211	41.5406	142.5393	62.2964	46.6194	57.6747	42.1643
LRRC37A4P	0.3095	4.6637	1.5626	0.0645	0.6634	5.8061	0.0772	1.4291	1.2582	1.2906	1.1471	1.8496	0.9031	1.5133	1.5754	4.3085	1.931	1.1308	1.2359	2.6836	2.5194	2.1334	0.0578	1.5371	4.4901	0.866	3.5965	1.8778	2.3259	3.2892	3.0389	3.6435	0.3562	0.6103	3.5947	2.4534	2.3832	0.5313	1.1041	3.757	0.6593	0.5761	1.8321	1.3979	0.6073	2.0002	3.1706	1.6667	0.1232
EDDM3DP	0.0276	0	0	0	0.0317	0	0	0	0	0	0	0	0	0.0377	0.0207	0	0	0	0	0	0	0.0536	0	0	0	0	0	0.0567	0	0	0	0	0	0	0	0	0	0	0	0	0.09	0	0	0	0	0	0	0	0
RNU7-71P	0	1.7641	2.2983	0	1.6049	0	0.7264	0.2168	1.4699	0.5954	0	0.9021	1.2234	0.2729	0.2993	1.0903	0	0	0.2815	1.0173	0	1.1637	0.586	0.6769	0.775	0.5795	0.7659	0.615	1.2126	1.9152	0.2136	0.285	0.2094	0.1948	2.6164	0.4312	1.2795	0.201	1.3998	0	0.3257	0.3263	0.5379	1.5891	0.2338	0.5497	1.1627	1.5725	0
AC010605.1	0.03	0.0221	0	0	0.0173	0	0	0	0.0664	0.0448	0.1045	0.0543	0.0132	0	0.0113	0	0	0	0.0212	0.0459	0.0276	0.0146	0	0.017	0.0146	0.0291	0	0.0154	0	0	0	0	0.0315	0	0	0.0162	0	0.0303	0	0	0.0245	0	0.0607	0	0	0.0138	0	0.0395	0
AFG3L1P	0.9558	2.0821	2.1604	0.325	1.5976	1.1414	1.1271	0.8817	2.4057	1.0138	0.7654	1.1403	0.7107	0.9086	1.5437	0.815	0.6398	1.8924	1.1854	3.208	2.3783	1.9961	1.4792	1.524	1.6136	0.9739	1.3451	1.6542	0.5687	1.3972	0.7651	1.3688	0.9887	0.9378	0.9956	1.5852	1.0752	0.1986	1.5786	0.7423	0.984	0.495	1.6996	0.9902	0.7992	0.94	1.2528	1.9334	0.0755
AC055876.4	0.2687	0.0991	0.0646	0.1176	0.0193	0.0262	0	0.0183	0.1239	0.0502	0.0702	0.1673	0.0884	0.046	0.1387	0.0459	0.1127	0.3144	0.0949	0.12	0.4328	0.3759	0.0165	0.1521	0.098	0.2116	0	0.1727	0.1788	0.1453	0.09	0.2162	1.1119	0.4595	0.1002	0.5632	0.027	0.0169	0.118	0.053	0.4391	0.0825	0.1813	0.3794	0.1182	0.1235	0.0653	0.0663	0
AC090282.1	0.0453	0	0.3482	0	0.0347	0.0235	0.3027	0	0.0223	0.1128	0.2314	0.2324	0.1986	0.1654	0.034	0	0.0811	0.0202	0.4052	0.0462	0.0834	0.4996	0.1184	0.0513	0.0294	0.2927	0	0.0311	0.5512	0.058	0.0485	0.2591	0	0.118	0.3063	0.6044	0.0242	0.1675	0.1767	0.0795	0.222	0.0742	0.0815	0.1806	0	0.0833	0.323	0.1191	1.0605
AC015726.3	0.0858	0.2954	0.11	0	0.0329	0	0	0.1245	0.1266	0.0855	0.1196	0.2072	0.1003	0.0783	0.043	0.0783	0.2688	0.2678	0.3636	0.4381	0.5265	0.0835	0	0.1296	0.1113	0.2773	0.0733	0.412	0.0435	0.0825	0.0307	0.0818	0.0902	0	0.0683	0.0619	0.0459	0.0288	0.2009	0.0602	0	0.2342	0.6176	0.038	0.0336	0.1052	0.0835	0.0752	0
CYP4F22	0	0.0067	1.5588	0.0369	0.1093	2.459	0.0082	0.0098	0.0067	2.8576	0.0315	4.3319	0.5037	0.2972	0.0475	0.334	2.6828	0.0786	0.1405	0.4109	0.0166	0.3301	0.0133	0.553	0.3957	0.0132	5.6371	0.0279	1.1282	1.8123	0.0291	0.0259	0.0143	0.1149	0.0054	0.1566	1.4227	0.1779	0.0265	0.2	0.0222	0.074	0.3234	0.1683	0.0106	1.2224	0.9895	0.1249	0.1286
KRTAP6-2	0	0	0	0	0.0879	0	0	0.0416	0	0	0	0	0	0.1046	0	0.0523	0.0513	0	0.054	0	0	0	0.0749	0	0	0	0.0489	0.1179	0	0	0	0	0	0.0373	0	0	0.0613	0	0	0	0	0	0	0	0	0	0	0	0
AC007731.5	0	0	0	0	0	0	0	0	0	0	0	0	0	0	0	0	0	0	0	0	0	0	0	0	0	0	0	0	0	0	0	0	0	0	0	0	0	0	0	0	0	0	0	0.0247	0	0	0	0	0
AC006386.2	0.2356	0.2607	0.1887	0.2406	0.1355	0.0918	1.1809	0.032	0.1303	0.176	0.1641	0.2666	0.4391	0.3629	0.5749	0.3223	0.3953	2.2845	0.2496	0.2105	0.1626	0.258	0.1155	0.1667	0.0286	0.3997	0.1886	0.3332	0.1792	0.1415	0.1263	0.1264	1.2071	0.7483	0.1055	0.0637	0.1891	0.4455	0.2413	0.124	0.2888	2.9897	0.5167	0.2348	0.311	0.1895	0.1146	0.0387	1.7732
COQ8B	3.8454	3.6806	5.0058	3.8924	3.8502	3.717	2.0172	4.5992	4.6155	5.087	4.9142	3.7598	5.1895	8.314	9.1432	4.2884	5.8427	2.8411	3.8623	4.6488	4.3835	3.7256	4.7733	3.1847	2.6437	4.8637	5.133	4.2493	5.1539	4.9331	5.6471	3.8108	1.5227	5.0974	3.7914	5.5277	4.1511	3.6869	4.331	4.2165	3.3291	2.3295	3.6899	6.1559	4.3918	2.7343	3.7628	5.1633	1.002
AL031773.1	0	0	0	0	0.0248	0	0	0	0	0	0	0	0	0	0	0	0	0	0	0	0	0	0	0	0	0	0	0.0222	0	0	0	0.0309	0	0	0	0	0	0	0	0	0.0353	0	0	0	0.0506	0	0	0	0
RTTN	3.0401	6.6081	4.6294	1.3626	2.804	4.2051	2.4222	6.1628	3.9406	2.1868	1.671	2.3921	2.2011	2.9459	3.4573	3.5379	2.3056	1.7155	5.0097	2.8918	2.0325	4.0244	5.4002	5.4365	9.85	3.3045	5.3923	5.0127	4.2466	4.6475	3.3708	2.5021	1.8484	2.6894	4.4256	3.2248	4.6272	1.7137	2.7061	3.8527	1.9622	2.0743	4.7219	3.7222	2.9821	4.3721	6.1262	3.8956	1.8201
AL445435.1	0.0899	0.8489	0.2765	0.042	0.1034	0.056	0	0.0196	0.0265	0.188	0	0.2442	0.0473	0.2708	0.135	0.2705	0.4585	0.024	0.4318	0.3671	0.1655	0.0875	0.1234	0.1221	0.4021	0.2091	0.0691	0.148	0.0821	0.2419	0.1349	0.0771	0.0756	0.0351	0.2361	0.1362	0.0866	0.0363	0.0842	0.1893	0.0294	0.0883	0.1213	0.0478	0.0211	0.0827	0.0525	0.1892	0
RPLP1P13	0.1999	2.006	0.4099	0.2333	0.184	0.2492	0.0729	0.1741	0.118	0.239	0.5014	0.2172	0.4559	0.1643	0.4504	0.4376	0.6441	0.5348	0.5084	0.7757	0.2944	0.1557	0.4704	0.4981	0.4666	0.1938	0.1537	0.3291	0.1217	0.2306	0.2143	0.1716	0	0.0782	0.1432	0.0865	0.2568	0.2016	0.515	0.7158	0.3268	0.1964	2.2126	0.0531	0.0938	0.1471	0.0778	0.3155	0.4013
AC074029.2	0	0	0	0	0	0	0	0	0	0	0	0	0	0	0	0	0.0506	0.0252	0	0	0	0	0	0.0214	0	0	0	0	0	0	0	0	0	0	0	0	0	0	0	0	0	0	0.0509	0	0	0	0	0	0
PRAMEF10	0	0	0	0	0	0	0	0	0	0	0	0	0	0	0	0	0	0	0	0	0	0	0	0	0	0	0	0	0	0	0	0	0	0	0	0	0	0	0	0	0.0256	0	0	0	0	0.0072	0	0	0
ROPN1B	0.0207	0.1046	0.0379	0.0138	0.0204	0.0736	0.0162	0.0643	0.0741	0.0706	0.0123	0.0428	0.0311	0.0526	0.0621	0.0121	0.0396	0.0277	0.0751	0.1478	0.0598	0.0316	0.0927	0.1338	0.0574	0.0916	0.2006	0.1337	0.0404	0.0965	0.057	0.0972	0.1273	0.2367	0.067	0.0703	0.0427	0.0179	0.0346	0.0311	0.0483	0.0435	0.0399	0.5692	0.1005	0.0869	0.1321	0.1865	0
AC126177.1	0	0	0	0	0	0	0	0	0	0	0	0	0	0.0074	0	0	0	0	0	0	0	0	0	0	0	0.0052	0.0069	0.0111	0	0	0	0	0	0	0	0	0	0	0	0	0	0	0.0073	0	0	0	0	0	0
RN7SL564P	0	0	0	0	0	0	0	0	0	0	0	0	0	0	0	0	0	0	0	0	0	0	0	0	0	0	0	0	0	0	0	0	0	0	0	0	0	0	0	0	0	0	0	0	0	0	0	0	0
DEUP1	0.017	0.3923	0.1196	0.0033	0.1822	0.758	0.0722	0.0923	0.2003	0.0803	0.0039	0.1998	0.0248	0.2672	0.0658	0.1818	0.1822	0.1173	0.2517	0.3177	0.302	0.5561	0.122	0.253	0.165	0.1261	0.4167	0.7798	0.6799	0.6144	0.0455	0.4248	0.2051	0.2184	0.2262	0.0735	0.1362	0.0599	0.2947	0.1608	0.4992	0.0973	0.0763	0.7594	0.2522	0.2731	0.5502	0.1786	0.1419
IL31RA	0.0993	0.081	0.0167	0.0549	0.0451	0.0204	0.0286	0.1223	0.0116	0.0117	0.0073	0.0118	0.0023	0.0072	0.0098	0	0.0351	0.0594	0.0221	0.0027	0	0.0407	0	0.0385	0.1448	0.0127	0.01	0.0726	0.0238	0.0176	0.0084	0.0075	0	0.0102	0.0031	0.0198	0.0084	0.0343	0.0092	0.0083	0.0598	0.0556	0.1234	0.0139	0.7634	0.0673	0.0102	0.0069	0.0175
AL023803.3	0	0.1014	0.0587	0.0802	0.0527	0.0357	0.668	0.0249	0.0676	0.0684	0.0319	0.1037	0.2812	0	0.0344	0.2506	0.1845	0.2757	0.0971	0.5379	0	0.0446	0.1347	0.0778	0.0891	0.0222	0	0.2121	0.0697	0.022	0.0737	0.0328	0.1926	0.0224	0	0.0496	0.0735	0.1386	0.1609	0.0965	0.2246	0.15	0.3091	0.0304	0.0269	0.1264	0.0891	0.0904	1.111
BNIP3P15	0	0.293	0.5599	0.0464	0	0.9284	0.0724	0.4755	0.7032	1.4242	0.7194	0.4676	0.3832	0.979	0.7457	0.489	0.16	0.3719	0.8417	1.2978	0.585	0.3866	0.3505	1.2144	0	0.8856	0.2545	0.7764	0.5439	0.1909	0.0852	0.7954	0.167	0.3494	0.7586	0.9455	0.3826	0.2003	0.5581	0.6692	0.0649	0.1951	0.6433	0.7391	0.4661	0.6209	0.7726	1.4105	0.1993
AC079598.3	0	0.1997	0	0.1053	0	0.0703	0.0822	0	0	0.0674	0	0	0	0.0618	0.0678	0	0	0.0603	0.0637	0	0	0.0439	0	0	0	0	0.0578	0.1857	0	0	0	0	0.0474	0	0	0	0.0724	0	0.1056	0	0	0	0.1218	0.06	0.0529	0.0415	0.0439	0	0
RNU6-400P	0	0	0	0	0	0	0	0	0	0	0	0	0	0	0	0	0	0	0	0	0	0	0	0	0	0	0	0	0	0	0	0	0	0	0	0	0	0	0	0	0	0	0	0	0	0	0	0	0
RNU6-632P	0	0	0	0	0	0	0	0	0	0	0	0	0	0	0	0	0	0	0	0	0	0	0	0	0	0	0	0	0	0	0	0	0.3927	0	0	0	0	0	0	0	0	0	0	0	0	0	0	0	0
AC091390.1	0.8308	3.1445	0.7406	0.5901	0.374	1.0131	0.5267	0.6289	0.4263	0.9174	0.2516	1.0139	0.4435	0.4946	0.9222	0.7906	0.5333	0.6281	1.3267	1.1801	1.0639	0.7735	0.9561	0.8998	0.2459	0.8404	0.3702	0.5202	0.4396	0.4166	0.3485	0.8266	0.3796	0.2471	1.3366	0.3517	0.116	0.1457	1.1841	1.027	1.3578	0.5915	3.9486	0.096	0.5086	0.4982	0.3162	0.5701	0.1812
AC245047.5	0	0	0	0	0.0247	0	0	0	0	0	0.03	0	0	0	0	0	0	0.0288	0.0304	0	0	0	0	0	0	0	0	0.0442	0.0327	0	0	0	0	0	0	0.0233	0	0	0	0	0	0.0352	0.0871	0	0	0	0.0209	0	0
RXFP2	0.0072	0	0.0092	0.0084	0.1078	0	0	0	0	0.0108	0.0151	0	0.0063	0.0049	0.0081	0	0.0048	0.8095	0.056	0	0	0.0035	0.3814	0.0326	0.0175	0.0035	0	0.0296	0	0.0035	0	0.0155	0	0.0141	0	0	0.0289	0	0	0	0.0412	0.0236	0.0486	0.0048	0.0169	0	0.0175	0.0805	0
OR7H1P	0	0	0	0.0757	0	0	0	0.0423	0.0191	0	0	0	0	0	0.0292	0	0	0.0694	0	0.0132	0.0239	0	0.0127	0	0	0	0	0.04	0	0	0	0.0185	0	0	0	0	0	0.0654	0	0	0	0	0.07	0.0172	0	0	0	0	0
MAGOH3P	0.107	0.0395	0	0.0624	0	0	0.1463	0.0291	0.1184	0.04	0.0745	0.0242	0	0	0.1205	0	0	0.0358	0.1511	0.0546	0.0492	0.0781	0.0787	0.1211	0.026	0.1037	0.0685	0.0275	0.2035	0.0771	0.0573	0	0.0562	0.0523	0.0639	0.0868	0	0.027	0.0939	0.0282	0.0437	0	1.0107	0.1066	0.0314	0.0492	0.078	0	0.1342
RPS3AP1	0	0	0	0	0.043	0	0	0	0	0	0	0	0	0	0	0	0	0.05	0	0	0	0	0	0	0	0	0	0	0	0	0	0	0.0393	0	0	0	0	0	0	0	0	0	0	0	0	0	0	0	0
AL132796.1	0	0	0	0	0.0287	0	0	0	0	0	0	0	0	0	0	0	0	0	0.0353	0	0	0	0	0.0283	0	0	0	0	0	0	0	0	0	0	0	0	0	0	0	0	0	0	0	0	0	0	0	0	0
AC006455.7	0	0	0	0	0.0351	0	0	0	0	0	0	0	0	0	0	0	0	0	0	0	0	0	0	0	0	0	0	0	0	0	0	0	0	0.0596	0	0	0	0	0	0	0	0	0	0	0	0	0	0	0
RNA5SP31	0	0	0	0	0	0	0	0	0	0	0	0	0	0	0	0	0	0	0	0	0	0	0	0	0	0	0	0	0	0	0	0	0	0	0	0.1019	0	0	0	0	0	0	0	0	0	0	0	0	0
AC092296.3	0	0.1417	0.0615	0	0.0552	0	0	0	0.7084	0.2152	0.1338	0.1304	0.0842	0.6575	0.4687	0.5911	0.0645	0.2569	0.1357	0.3432	0.2652	0.1869	0.1883	0.2719	0.0934	0.0465	0.2461	0.247	0.073	0.0923	0.0515	0.5494	1.3121	0.0469	0.4585	0.052	0.1542	0.0969	0.1686	0.2528	0.0785	0	0.3888	0.3191	0.2817	0.0442	0.7471	0.0632	0.3212
AL158212.2	0.182	0.5369	0.4996	0.2123	0.2392	0.567	0.8054	0.2263	0.3451	0.3495	0.3621	0.7296	0.6839	0.6406	0.8588	0.96	0.5233	0.591	0.3672	2.1761	0.9091	0.7083	0.586	0.2354	0.1516	0.1008	0.6993	0.4011	0.3559	0.1998	0.3901	0.7435	0.7649	0.9399	0.8066	0.3937	0.6258	0.1573	0.6086	0.4653	0.977	0.2554	0.8068	1.14	0.3355	0.6214	0.4297	0.6495	0.2608
MIR6512	0	0	0	0.3624	0.536	0.2419	0	0.169	0	0	0.4327	0.1406	0.1362	0.4252	0	0	0.2084	0.2077	0	0.6341	0	0.3023	0	0	0	0.301	0	0	0	0.1492	0.1665	0.4442	0.9792	0.1518	0.1853	0.336	0	0.1566	0	0.1635	0	0	0.4191	0.4127	0	0	0.151	0	0
AC022517.1	0.0346	0.051	0.0443	0.3226	0.1193	0.1077	0	0.0376	0.102	0	0.337	0	0	0.2839	0.1557	0.3309	0.0928	0.0462	0.0488	0.0353	0.3817	0	0	0.2348	0.1008	0.268	0	0.1777	0	0	0.037	0	0	0.304	0	0.2243	0	0.0349	0	0.0364	0	0	0.1399	0	0.0405	0.0635	0	0.1363	0
RPA2P1	0	0	0	0	0.0191	0	0	0	0	0	0	0.03	0	0.0227	0.0125	0	0.0223	0	0	0.0169	0	0	0.0163	0.0188	0.0161	0	0	0.0171	0	0.0159	0	0.0237	0	0	0	0	0	0	0	0	0	0	0.0224	0	0	0	0	0	0.0277
RF02110	0	0	0	0	0	0	0	0	0	0	0	0	0	0	0	0	0	0	0	0	0	0	0	0	0	0	0	0	0	0	0	0	0	0	0	0	0	0	0	0	0	0	0	0	0	0	0	0	0
AC098614.1	0.8667	1.3024	0.8432	0.1873	0.517	1.3253	0.2925	0.7509	0.4499	0.4316	0.2236	0.6103	0.4504	0.4615	0.2651	1.0318	0.3662	0.4508	0.5441	0.7373	0.2363	0.7654	1.0541	0.6178	1.5917	0.4978	0.514	1.9812	1.0499	1.3573	0.4989	0.4591	0.0506	0.2039	0.6321	0.4688	0.3607	0.5503	0.5449	0.7943	0.3147	0.1577	0.4548	0.5119	0.8097	1.5937	0.8896	0.6121	0.0537
IGKV2-40	0	0	0	0	0	0	0	0	0	0	0	0	0	0	0	0	0	0	0	0	0	0	0	0	0	0	0	0	0	0	0	0	0	0	0	0	0	0	0	0	0	0	0	0	0	0	0	0	0
FKBP14	6.5396	4.6703	5.1236	4.4614	6.2403	5.7224	7.3322	9.0775	3.7258	4.239	3.3091	5.0755	4.1759	4.7737	6.1915	4.0626	5.1466	4.1645	2.3847	4.38	3.1076	3.9504	6.514	3.1748	5.7233	6.2781	3.2874	8.7525	6.7723	4.9623	3.8143	4.5689	1.5195	2.3169	6.7979	5.4626	3.6792	5.2934	4.644	2.0542	5.0959	3.7898	8.2042	3.7146	8.5634	4.4317	5.4208	4.8657	2.4593
IGLVI-38	0	0	0	0	0	0	0	0	0	0	0	0.1125	0	0.0425	0	0	0	0	0	0	0	0	0	0	0	0	0	0	0	0.0298	0	0	0	0	0	0	0	0	0	0	0	0	0	0	0	0	0	0	0
SOCS2P2	0	0	0	0	0	0.0325	0.4936	0	0	0	0	0	0.0365	0	0	0	0.028	0	0	0.0213	0.115	0.0608	0	0.0236	0.1215	0	0	0	0.0317	0.0601	0.0223	0.0298	0.0438	0	0	0	0	0.021	0	0	0	0	0.0562	0	0	0	0.0405	0	0
OR1F1	0.0508	0.0187	0	0.0296	0.0292	0	0.0231	0	0.0187	0.019	0	0	0	0	0.0191	0.0694	0	0.017	0	0.0259	0	0	0	0	0	0.0123	0	0.0131	0	0	0	0	0.04	0.0372	0.0151	0.0275	0	0	0	0.1871	0	0	0.0343	0.0506	0.0149	0	0	0	0
RN7SKP293	0	0	0	0	0	0	0	0	0	0	0	0	0	0	0	0	0	0	0	0	0	0	0	0	0	0	0	0	0	0	0	0	0	0	0	0.0437	0.0648	0	0	0	0	0	0	0	0	0	0	0	0
RPL10P14	0.1605	0.1184	0.2057	0.1873	0.0462	0	0.3656	0.3056	0.0592	0.2398	0.1677	0.1453	0.2463	0	0.1205	0	0	0.322	0.1134	0.1229	0.0739	0.1562	0.0393	0.1817	0	0.1167	0.1028	0.0413	0.061	0.0386	0.086	0	0.1265	0.2745	0.0479	0.0868	0	0.2023	0.1409	0.0422	0	0.1971	0.7581	0.2133	0.2825	0.1845	0.078	0	0.3355
IFIT5	5.2919	4.2444	5.0945	4.6671	9.9192	6.6676	9.4333	6.0791	4.0989	8.1589	7.6341	7.6441	7.4278	8.0369	5.4158	4.3789	4.7606	5.5323	7.3195	2.9218	9.6645	25.1	8.0191	24.3586	3.0287	5.7792	7.8441	6.2004	5.5225	6.2477	3.7605	28.5828	3.4428	12.2937	6.071	4.6107	5.1865	5.5021	8.5939	5.5252	16.3181	8.4504	7.7162	3.7678	8.6027	7.6092	6.0121	5.4166	6.3204
SETX	5.0299	8.0839	11.4535	3.2606	7.3508	13.062	3.1234	7.9735	5.5663	4.433	4.7586	6.0799	4.3283	6.9869	4.4268	5.4507	5.576	5.6537	9.4116	8.7119	5.4734	16.7509	11.8984	9.4109	11.4351	4.9539	10.4791	8.165	10.0416	10.1412	11.681	9.4207	3.9086	8.0383	15.9368	10.1616	7.6517	3.7566	5.0549	17.3719	3.533	3.1383	5.5837	6.6141	5.4256	8.7088	13.8141	8.0865	1.6736
AC012558.1	0.2883	0.0284	0.2463	0.4262	0.1106	0.0899	0.1401	0.1046	0.1702	0.1723	0.0268	0.0174	0.0337	0.0526	0.0433	0	0.129	0.0257	0.0543	0.0981	0.2831	0.0374	0.0188	0	0.0187	0.0373	0.0985	0.1384	0.2047	0.0739	0.0824	0.0825	1.4748	0	0	0	0	0.0194	0.1125	0.0202	0.1571	0.1259	1.1414	0.2299	0.0226	0.0707	0.0748	0	0.225
AL445528.1	0	0	0	0	0	0	0.0519	0.031	0	0	0	0	0	0.039	0	0	0	0	0.0402	0	0	0	0	0.0645	0	0	0.0365	0	0	0	0.0305	0.0407	0	0	0	0	0	0.1436	0	0.03	0.0465	0.0466	0	0	0	0.0262	0	0	0.0952
MT1G	0.9247	0.8938	0.6333	0.3163	28.9439	0.1987	6.0727	0.4163	0.2117	1.6909	3.8869	4.8066	2.2231	0.6549	2.1786	2.0716	3.6377	4.0939	0.0676	0.0326	0.9097	5.2754	0.7032	2.7979	0.0775	1.0508	1.6135	8.8066	0.5821	0.7814	0.1367	1.1856	42.6079	1.153	1.1988	1.8456	0.9468	10.5953	1.1945	0.1175	6.4873	0.3393	2.3881	1.0382	22.4467	0.7036	0.5736	0.4403	1.1465
AC245060.3	0	0.0142	0	0	0.0665	0	0	0	0	0	0.0268	0	0	0	0	0	0	0	0	0	0	0	0	0.0109	0	0	0	0.0297	0	0	0	0	0	0	0	0	0	0	0	0	0	0	0	0	0	0.0089	0	0	0
RF00402	0	0	0	0	0	0	0	0	0	0	0	0	0	0	0.1403	0	0	0	0.5278	0	0	0.0909	0	0	0	0.0905	0.1197	0.0961	0	0	0	0	0	0	0.1115	0	0	0	0	0	0	0	0	0	0	0	0.0908	0	0
MIR16-2	0	0.4356	0	0	0	0	0.8071	0	0	0	0	0	0	0	0	0.4038	0	0	0	0	0	0	0	0	0	0.2862	0	0	0	0.4256	0	0	0	0	0.3524	0	0	0	0	0	0	0	0	0	0	0	0	0	0
SNORD28	0	0	0	0	0	0	0	0	0	0	0	0	0	0	0	0	0	0	0	0	0	0	0	0	0	0	0	0	0	0	0	0	0	0	0	0	0	0	0	0	0	0	0	0	0	0	0	0	0
RF00425	0.0906	0	0	0.1057	0.1042	0	0	0.2957	0	0	0	0.164	0	0.124	0	0	0.1216	0.6057	0.128	0.3699	0	0.529	0	0.6154	0.3523	0.1756	0	0.3727	0	0.0871	0.0971	0	0.6664	0.1771	0	0.392	0	0	0.4242	0	0	1.1865	1.2224	0.1204	0.2126	0	0	0.1191	0.303
ZNF346	4.6209	5.9444	6.6963	2.516	5.0641	7.0923	3.5437	7.0883	5.5559	6.0949	6.5658	5.7086	6.1404	6.4354	5.9067	4.5197	5.6372	4.6685	6.1849	6.8304	5.5846	5.0313	5.8879	4.5618	4.5798	6.8635	5.142	7.3205	7.3906	5.9392	5.7876	5.1746	3.1778	3.6906	5.9752	7.705	5.6643	4.9381	6.7002	3.2805	4.5451	4.4119	5.048	7.1586	8.4157	6.1161	5.4068	6.8121	2.1721
AC007595.1	0	0.073	0.0317	0.0578	0	0	0	0	0	0	0	0	0.0217	0.0339	0.0558	0.0677	0	0.1324	0	0.0758	0	0	0.0485	0	0	0.048	0	0	0	0	0	0	0.052	0.0242	0	0	0	0.025	0	0	0	0	0	0.0658	0.029	0	0	0	0
ACSL4	8.8627	5.1205	8.1732	9.4199	13.4521	8.2939	9.6986	6.7841	4.9164	8.2945	6.2789	7.5957	9.9597	6.8395	5.0775	8.5917	8.4833	11.6616	9.0174	7.2558	11.3051	8.0888	14.1069	5.5968	18.0918	7.4581	4.6826	8.072	10.3267	8.8363	6.7871	14.1227	2.2272	4.4319	5.6128	9.8934	9.6874	8.2068	9.2868	4.5709	15.6198	20.7589	4.7061	4.0674	9.0692	11.2214	7.7667	6.0178	10.7577
AC015853.2	0.1455	0.0716	0.0622	0.0849	0.0279	0.1134	0	0.0264	0.2862	0.2536	0.1014	0.8344	0	0.2657	0.0546	0.1327	0.0326	0.1622	0.1713	0.1238	0.2679	0.2833	0.0951	0.4394	0.2594	0.2351	0.1243	0.0748	0.0369	0.0233	0	0.1734	1.147	0.0474	0.0579	0.105	0.0389	0.1468	0.2555	0.0511	0	0	0.6219	0.0645	0	0.1115	0.3538	0.0957	0
RF00019	0.6965	2.3978	1.9338	0.9482	1.0685	0.1809	0.4231	0.3789	0.1713	0.1734	0.9704	1.4715	0.4072	2.2253	0.8716	1.4291	0.9349	2.4841	0.164	1.8963	4.4874	1.1298	1.2517	1.0515	1.5802	1.2378	1.4872	0.7165	0.3532	1.1156	0.6222	2.6564	0.854	0.9076	3.1867	0.1256	0.559	0.1171	0.8154	1.1001	1.8971	1.7107	1.7232	0.4628	0.2724	0.7471	0.4516	1.2213	0
RNU6-982P	0	0.173	0	0	0	0	0	0	0	0	0	0	0	0	0	0	0	0	0	0	0	0	0	0	0	0	0	0.1206	0	0	0	0	0	0	0	0	0	0	0	0	0	0	0	0	0	0	0	0	0
WDR11-AS1	0.2704	0.6864	0.3465	0.112	0.4316	0.7475	0.1166	0.4018	0.163	0.6168	0.1823	0.3633	0.408	0.4021	0.3166	0.6284	0.2615	0.1439	0.5093	1.2617	0.3104	0.2236	0.1767	0.3095	0.1866	0.5496	0.3949	0.688	0.2566	0.503	0.3803	0.2537	0.2842	0.6479	0.6386	0.5977	0.3874	0.1114	0.2996	0.4133	0.8221	0.1524	0.2865	0.2976	0.6448	0.5855	0.5853	0.6425	0.7781
AC091588.2	0	0.0482	0	0.0381	0.0752	0	0	0	0	0	0	0	0	0	0	0	0	0	0	0	0	0.0318	0	0.111	0	0.0317	0	0	0	0	0.035	0	0	0	0	0	0	0.1318	0	0	0	0	0.7936	0.0434	0.0383	0	0	0	0
AC024901.1	0.05	0.0246	0.064	0	0.0575	0.0519	0.2428	0	0.1474	0.0746	0.0232	0.0151	0.0876	0	0.05	0.0228	0	0.0223	0.1647	0	0.2759	0.1297	0.0816	0.0566	0.1781	0.0969	0	0.0685	0.1773	0.096	0.0536	1.5957	0.0525	0	0.0199	0.036	0.0535	0	0	0.0351	0.0816	0	0.3371	0.0221	0	0.0153	0.1457	0.0657	0
AC010451.3	0	0	0	0	0	0	0	0	0	0	0	0	0	0	0	0	0.0361	0	0	0	0	0	0	0	0	0	0	0	0	0	0	0	0	0	0	0	0	0	0	0	0	0	0	0	0	0	0	0	0
HERC2P7	0.0158	0	0	0	0.0544	0	0	0	0.0465	0	0	0.0285	0	0.0431	0.0118	0.0215	0	0.0211	0.0445	0.1126	0	0.0153	0.0309	0.0178	0.0613	0	0	0.0324	0	0	0.0169	0.0451	0.0166	0	0.0188	0.017	0	0	0	0.0332	0	0	0.0213	0.0419	0.0185	0.0145	0	0.0207	0
ZNF252P	1.7449	3.7141	3.0265	2.4098	2.8316	6.8261	2.2631	2.8615	6.2627	3.2197	3.4398	2.9774	2.931	4.9	2.5968	4.0047	2.5017	3.5119	3.543	5.6192	3.8303	5.0591	3.7758	4.749	5.349	2.9089	4.8375	4.1869	2.897	3.2634	5.006	5.8883	2.7583	3.8066	4.1372	4.429	5.2911	2.0036	2.8553	6.4835	2.6358	2.2386	3.1996	1.5998	2.7819	6.6672	3.5805	4.0739	1.9892
PFKFB1	0.3079	0.1114	0.2159	0.5763	0.234	0.2173	0.1165	0.1897	0.2228	0.2257	0.3157	0.1105	0.0968	0.2705	0.157	0.0954	0.117	0.2098	0.0985	0.2076	0.2567	0.1414	0.4044	0.0724	0.1186	0.1126	0.2754	0.245	0.1679	0.1452	0.2803	0.1579	0.1832	0.2044	0.2219	0.4337	0.1212	0.2871	0.204	0.208	0.076	0.1903	0.2274	0.1313	0.2454	0.5876	0.2486	0.3438	0.0194
BMS1P17	0.0212	0	0	0.0123	0.0122	0	0.0386	0	0.2029	0.2055	0.0147	0	0	0	0.1827	0.1737	0	0.0283	0	0	0	0.0103	0.1141	0	0	0.1231	0	0	0	0	0.0113	0	0.0222	0.0207	0	0	0	0.032	0	0	0	0	0	0.0422	0.0124	0.0097	0	0	0
NSD1	4.6299	11.5602	16.5462	2.9504	12.0923	19.0987	1.4741	13.4663	11.465	9.0269	6.5957	8.7674	6.6438	11.4296	6.4899	8.4617	9.3383	5.803	9.6459	9.7452	11.08	15.6819	19.7373	12.9493	17.1082	8.4321	17.0808	12.8146	13.8049	14.5729	17.6395	17.7701	3.2294	6.0543	17.77	11.6981	14.7034	4.0379	8.4031	11.0561	2.5447	2.0616	6.9658	10.6403	10.5205	15.3953	16.9506	16.2324	0.9696
MIR128-1	0	0	0.138	0	0	0	0	0	0.1589	0	0	0	0	0.295	0	0	0	0	0.1522	0.2199	0.1983	0	0.1056	0.122	0	0	0	0	0	0	0	0	0.2264	0	0	0	0	0	0	0	0	0	0	0	0	0.099	0.1048	0	0
CDC42P6	0.4152	0.7351	0.8246	0.5329	0.406	0.7115	3.5942	0.7002	0.0919	0.2171	0.4916	0.5638	0.5097	0.5685	0.2338	0.937	0.5294	0.2221	0.5864	0.4027	0.1911	0.8687	1.0378	0.4231	0.8477	0.3219	0.9042	1.4093	0.4737	0.5785	0.7343	0.5047	0.1963	0.3246	0.6194	0.5615	0.6664	0.649	0.5346	0.5464	0.6445	0.4758	0.3642	0.2759	0.4871	1.4314	1.1708	0.819	1.9789
ZNF385C	1.6648	2.7556	10.4277	5.5152	4.8529	9.1585	0.3017	5.3331	4.1105	27.1301	7.6501	7.866	17.1708	19.9568	10.0494	10.4067	11.6921	3.7515	8.3822	2.2829	12.7646	7.432	6.8798	3.5033	8.2704	5.4854	8.0085	4.7539	2.6851	16.2818	13.7517	7.7331	0.6592	5.0702	13.375	10.3254	4.6746	7.045	7.4739	7.8786	4.7135	1.7218	6.0666	2.8757	3.7781	9.6729	11.0492	15.8782	1.3259
TTTY21B	0	0	0	0	0	0	0	0	0	0	0	0	0	0	0	0	0	0	0	0	0	0	0	0	0	0	0	0	0	0	0	0	0	0	0	0	0	0	0	0	0	0	0	0	0	0	0	0	0
RN7SL381P	0.2006	0.296	0.2571	0.1873	0.0923	0.5001	0.0731	0.6112	0.1776	0.1798	0.1118	0.3996	0.0352	0.0549	0.241	0.5488	0.1616	0.2147	0.2834	0.6554	0.2216	0.5467	0.59	0.2272	0.3121	0.1556	0.2056	0.454	0.1831	0.5784	0.2581	0.1722	0.0422	0.0784	0.2873	0.1736	0.3864	0	0.1409	0.0845	0.0656	0	0.4873	0.2666	0.0942	0.1845	0.3902	0.5804	0
LINC00899	1.3124	1.9364	1.4495	0.3667	0.6618	3.9126	2.8325	1.0941	1.1945	0.6138	0.4849	1.7091	1.6216	0.8273	1.3012	0.6876	0.9311	1.959	0.3755	4.0246	2.4826	1.0186	3.4686	1.4997	0.2632	1.8602	4.8738	2.0487	0.6839	1.2195	1.2773	1.9392	4.1354	1.037	1.9645	1.8305	1.4044	0.2998	1.6355	0.4174	1.3193	0.9221	0.9459	1.2945	1.7724	0.8067	3.0156	2.9784	0.2708
RUNDC3A-AS1	0.1372	0.0686	0.2269	0.0258	0.275	1.0413	0.0605	0.1035	0.6007	0.4727	0.1603	0.4488	0.6696	0.5697	0.1961	0.2603	0.1307	0.1154	0.1	1.4505	0.1018	0.2434	0.0542	0.1077	0.4239	0.0408	0.3147	0.0296	0.0606	0.2084	0.0925	0.0506	0.214	0.1384	0.0872	0.249	0.0284	0.0647	0.0622	0.4567	0.1049	0.0362	0.23	0.2676	0.0493	0.2584	0.1894	0.2008	0.0407
AC017053.1	0	0	0	0	0.0238	0	0	0	0	0	0.0288	0	0	0	0.031	0	0	0	0	0.0211	0	0	0.0202	0.0234	0	0	0	0.0425	0	0	0	0	0	0.0202	0	0.0223	0	0	0	0	0	0	0.0279	0	0	0	0	0	0
TRMT112P6	0.1929	0.3794	0.5766	0.225	0.2589	0.3506	1.0545	0.4896	0.8061	0.5282	0.6717	0.5529	0.5356	0.8362	0.4586	0.3517	0.5177	0.6878	0.8626	0.4594	0.71	0.2815	0.1575	0.3639	0.2188	0.5297	0.3294	1.2234	0.1467	0.6178	0.3101	0.4137	0.2702	1.0994	0.0767	0.5564	0.4643	0.6159	0.6021	0.1354	0.7354	1.1578	0.4771	0.598	0.5657	0.6502	0.2188	0.465	1.2364
ZNF725P	0	0.0108	0	0.0171	0	0	0	0	0	0	0	0	0	0.01	0.0165	0.0301	0	0	0.0517	0	0.0539	0.0071	0	0.0083	0	0	0	0.0452	0	0.007	0	0.0524	0	0.0072	0.0087	0	0	0	0	0	0	0	0	0	0	0	0	0	0
AC233279.1	0.0848	0.1668	0.2173	0.3298	0.1951	0.044	3.5032	0.0923	0.5004	0.2534	0.2363	0.3327	0.2231	0.3096	0.2335	0.0773	0.3415	2.0415	0.1597	0.3463	0.5203	0.055	0.1385	0.16	0.055	0.4658	0.4346	0.4362	0	0.2173	0.1212	0.2021	1.3962	2.3205	0.0337	0.1835	0.1815	0.1425	1.0589	0.2976	1.0625	1.9902	0.3433	0.0751	0.3317	0.3119	0.055	0.1487	0.9928
AC021224.1	1.4789	3.6229	2.3421	0.7001	1.4126	3.1955	0.4577	4.4633	2.9021	1.2714	2.488	2.2612	2.6429	1.4518	2.7866	3.187	2.1535	0.4105	1.8328	1.9372	0.8732	2.933	2.1472	2.259	2.7131	1.8393	2.7169	5.2242	2.8653	3.0839	1.69	0.4589	0.3372	0.45	1.7818	2.0378	2.665	2.0684	2.695	1.6013	0.4788	0.8224	3.3326	2.2251	1.948	5.8239	6.2682	2.4954	0.3033
RBM33	3.8132	10.0511	4.3053	3.23	3.811	4.9865	2.6684	3.8907	2.9954	3.7731	2.7958	3.4781	3.0727	3.9695	4.2005	12.6285	5.4077	2.2115	8.1798	5.6908	4.4013	4.857	6.5788	3.499	6.6716	4.2699	4.0476	4.5866	4.3728	4.7602	5.4159	4.585	3.577	3.6875	5.2305	4.2832	5.7685	2.4838	3.1679	5.7485	1.8614	1.2806	5.0022	2.8836	5.0756	4.7667	4.2757	5.0867	0.6868
TRIP4	8.7759	6.3024	6.7347	8.06	6.6787	6.4296	4.136	5.586	7.2525	5.2758	3.5707	6.195	6.0374	7.969	5.6273	4.2882	5.0423	6.1416	7.7417	8.5002	9.0917	5.5902	5.6491	5.506	5.7553	8.4143	8.7364	7.5172	6.3706	6.5867	7.6043	8.4547	3.9162	9.5272	5.713	7.8031	5.8649	2.9079	7.3583	5.8191	6.0209	6.782	6.4543	8.475	5.2537	6.3611	6.0121	7.268	2.6854
ADGRL2	9.8303	13.8122	30.7048	7.0897	31.5228	41.0451	21.972	29.5378	7.3204	8.6244	11.2958	25.0483	50.1558	41.7311	2.8715	23.5999	32.2398	16.5237	22.1519	14.1592	1.3057	90.1964	26.9966	16.5028	8.3167	10.043	35.6223	8.2643	41.197	15.4388	14.817	2.3553	0.4408	27.4427	34.1593	11.9254	0.6287	14.1733	19.9515	68.3471	20.2909	18.7825	19.2363	56.4901	7.684	19.8575	21.6474	64.4224	14.2075
AL591212.1	0.0194	0.2868	0.0249	0	0.0895	0.0606	0.1063	0.0635	0	0.0871	0.1083	0.1232	0.0341	0.0799	0.0876	0.133	0.1827	0.312	0.1648	0.3176	0.1074	0.1514	0.0762	0.044	0.0567	0.0377	0.0249	0.14	0.0296	0.0934	0.0417	0.0556	0.0817	0.057	0.0696	0.0841	0.0312	0.0196	0.0683	0.0614	0	0.2228	0.0787	0.0775	0.0228	0.1788	0.1134	0.0767	0
GLYATL2	0.0716	2.5147	0.9503	0.372	0.8083	0.5169	0.1186	0.361	1.8522	1.895	0.3716	1.1839	0.7702	0.8729	2.7354	0.3826	0.9168	0.0783	2.4535	1.4678	1.449	1.4689	0.9183	0.9207	0.5187	3.0646	0.6251	2.041	0.574	1.688	0.4114	0.6047	0.9708	2.3841	1.1802	1.3514	1.7647	0.8988	1.15	0.685	1.5947	0.5539	0.755	1.8934	1.0075	2.0097	1.436	0.5133	1.6211
AC063976.4	0	0	0	0	0.0844	0	0.5348	0	0	0	0	0	0	0	0	0	0	0	0	0	0	0	0	0	0	0	0	0.1509	0	0	0	0	0	0	0	0.0794	0	0	0	0	0	0	0	0	0	0	0	0	0.1227
MYBPHL	0.0267	0.0394	0.0514	1.5442	0.1461	0.0104	0.2436	0.0291	0.0493	0.0399	0.1955	0	0.0234	0.0275	0.0502	0.0091	0.0359	0.4022	0.0283	0.0341	0.1107	0.013	0.0131	0.0454	0.0065	0.0259	0.0171	0.0138	0.0508	0.0128	0.0143	0.0287	0.3091	0.0849	0.0638	0.0795	0	0.1483	0.0391	0.007	0.0328	0.0109	0.0722	0.0888	0.0078	0.0123	0.026	0.0439	0
ZNF589	1.4012	3.649	2.9472	0.9275	2.0855	4.3191	0.6315	2.6087	3.2236	3.8046	2.3504	3.0726	2.8224	2.8734	1.8831	3.0571	4.1887	2.0276	4.2736	4.5415	4.154	3.383	3.5219	3.7297	3.4513	2.5527	3.7206	4.4044	2.7477	3.8421	3.6935	4.2774	2.424	2.7494	3.2337	3.2007	3.3546	1.0811	3.1388	5.3064	1.1856	1.312	2.3702	2.0061	5.0135	4.7311	3.1064	3.2241	0.4926
AC017078.1	0	0.0959	0.0416	0.0379	0	0.0506	0	0.0354	0	0.0485	0.0453	0	0.057	0	0.0244	0	0.0436	0.0435	0	0.0663	0	0	0	0	0.1264	0	0	0.0334	0	0.0937	0	0	0	0	0	0	0	0.0328	0.1141	0	0	0	0.0438	0.0432	0.1144	0	0	0.0427	0.0543
NUFIP1	4.6361	6.81	4.7431	7.5117	5.5507	8.5785	4.9363	5.1118	7.2839	7.2224	9.6838	5.7477	7.315	8.0217	8.0961	7.5638	3.8007	4.9596	11.6611	4.8905	6.1138	6.0051	5.7865	8.1027	5.4133	6.9069	8.3346	7.8652	5.7871	7.5816	5.7772	5.7784	4.455	5.6084	6.028	5.0975	7.9584	4.8344	7.059	8.6493	4.7115	4.9001	9.2461	5.9021	5.9379	7.4581	7.5419	6.6466	3.5333
AC099550.1	0.0275	0.1823	0.0528	0.0641	0.0632	0.2567	0.025	0.0597	0.0405	0.1641	0.0191	0.1243	0.1204	0.1692	0.0309	0.1502	0.1474	0.0367	0.5623	0.1822	0.278	0.2405	0.0269	0.2331	0.0934	0.0665	0.0879	0.0282	0.1253	0.2243	0.103	0.0589	0.1876	0.2281	0.1638	0.0297	0.0661	0.0554	0	0.2891	0	0.0225	0.0741	0.1277	0	0.3913	0.2002	0.2528	0.1148
AL138900.2	0	0	0	0	0	0	0	0	0	0	0	0	0	0	0.0576	0	0	0	0	0	0	0	0	0	0	0	0	0	0	0	0	0.1096	0	0	0	0.1659	0	0	0	0	0	0	0	0	0	0	0	0	0
AP001858.1	0	0	0	0	0.0103	0.0139	0	0	0	0	0	0	0	0	0	0	0	0	0	0	0	0	0	0	0	0	0	0	0	0	0	0	0	0	0	0.0193	0	0	0	0	0	0	0	0	0	0	0	0	0
AC141586.2	1.3587	0.3393	1.2857	0.3171	0.8418	0.3257	0.0381	0.6369	0.8018	0.8119	0.0582	0.5489	0.22	1.4597	0.3767	0.1716	1.5151	0.5871	0.0591	0.5122	1.6161	1.6276	1.1885	1.7514	0.5284	1.8033	2.0085	1.3117	0.5088	0.8638	0.0896	0.0299	0.8568	0.0817	1.497	0.8368	0.6711	0	1.8843	0.9244	0.1366	0.0685	0.6488	0.0833	0.5641	1.4799	2.0734	1.0721	0.0699
AC023078.3	0	0	0	0	0	0	0	0	0	0	0	0	0	0	0	0	0.0168	0	0	0	0	0	0	0	0	0	0	0	0	0	0	0	0	0	0	0	0	0	0	0	0	0	0	0	0	0	0	0	0
RNU6-165P	0	0	0	0	0.2779	0	0	0	0	0	0	0	0	0	0	0	0	0	0	0	0	0	0	0	0	0	0	0	0	0	0	0	0	0	0	0	0	0	0	0	0	0	0	0	0	0	0	0	0
WBP1LP2	0.4045	0.1865	0.4859	0.295	0.2327	0.3939	0.0921	0.2201	0.3356	0.2643	0.3698	0.1831	0.1552	0.45	0.1708	0.0864	0.2714	0.2029	0.4999	0.1419	0.3257	0.3444	0.3841	0.4007	0.5161	0.245	0.3886	0.234	0.5576	0.5102	0.3252	0.2169	0.9431	0.6423	0.3017	0.3692	0.1826	0.2677	0.2959	0.4525	0.1033	0.3518	0.2729	0.5375	0.2669	0.2324	0.5777	0.266	0.0634
ALG1L13P	0.0331	0.1829	0.1694	0	0.038	0.3219	0.0301	0.1079	0.1829	0.037	0.1842	0.0374	0.0652	0.1697	0.0372	0.1695	0.2107	0.1216	0.0584	0.7846	0.4107	0.2091	0.1134	0.131	0.2812	0.2403	0.1588	0.1615	0.1257	0.1985	0.0443	0.1654	0.1997	0.1777	0.2071	0.2503	0.0398	0	0.029	0.2001	0.081	0.0271	0.1227	0.0769	0.1357	0.2127	0.1045	0.0326	0
DDX18P5	0	0.2161	0.1173	0.0214	0.0737	0	0.0167	0.0498	0.108	0.0274	0.051	0.0995	0.0803	0.0501	0.0137	0	0.1352	0.0367	0.0905	0.0935	0.1685	0.0802	0.0538	0.0933	0.0623	0.0266	0.0352	0.1224	0.0418	0.0352	0.0098	0.1571	0.0096	0.0179	0.0328	0.0297	0.0441	0	0.0214	0.0482	0.015	0.045	0.1236	0.0852	0.0107	0.1431	0.0445	0.0602	0
MIR6775	0	0	0	0	0	0	0	0	0	0	0	0	0	0	0	0	0	0	0	0	0	0	0	0	0	0	0	0	0	0	0	0	0	0	0	0	0	0	0	0	0	0	0	0	0	0	0	0	0
NXPE4	0	0.0245	0.0354	0	0.0254	0.0172	0	0.0301	0.0082	0.0083	0	0	0	0.0151	0	0	0	0.0222	0.039	0.0056	0.0102	0.0269	0.0542	0.0188	0	0.0054	0.0071	0.0171	0	0	0	0.0079	0	0.0108	0	0.0179	0.0089	0	0.0259	0	0	0.0091	0.0149	0	0.0065	0	0.0054	0.0509	0
IGFL3	0	0	0	0	0	0	0.0329	0	0	0	0	0	0.0317	0.1731	0.0407	0	0.0485	0.0242	0	0	0.2327	0	0	0	0	0.0175	0	0	0	0	0.0194	0	0.0949	0.0177	0	0.0391	0	0	0	0	0	0	0.0487	0.072	0	0.0166	0	0	0
PCDH15	0.1682	2.5985	2.4603	0.2707	1.2622	5.0925	0.0724	0.2508	0.2171	1.7981	1.9785	1.9026	2.6056	4.5094	1.4937	0.9947	6.4917	0.9965	1.4935	7.7939	2.1541	3.0583	6.5537	0.8428	1.2287	0.84	2.6173	2.2578	4.0354	1.4613	1.9955	1.2728	0.0025	5.8514	8.1285	1.1322	4.2966	1.0922	3.955	1.6306	3.1084	1.5655	2.5343	3.156	5.1085	2.0681	1.6165	6.0987	0.4284
AL606534.2	0.0245	0.0723	0.0314	0	0	0	0	0.0267	0.0361	0.0732	0.0341	0	0.0215	0	0.0184	0.0335	0.0658	0	0.0346	0.2001	0.0451	0.0238	0.024	0.111	0.1191	0.095	0	0.0504	0	0	0	0	0	0	0.0877	0.0795	0.0787	0	0.0287	0.0516	0	0	0.0661	0	0.0575	0	0.0477	0.0322	0.082
MEX3A	14.7429	39.275	30.7111	7.7783	25.5409	40.2003	6.6722	29.1992	35.6985	40.5938	19.5685	20.3911	25.7906	37.8545	28.6916	34.4054	34.9586	17.0231	64.698	25.3989	29.8986	73.2367	44.479	45.2702	70.7866	40.7942	40.859	61.6012	42.3577	40.6742	27.9319	28.5573	4.4056	26.2692	66.5992	30.5835	54.1799	10.1031	38.8048	70.7786	9.3647	13.5549	40.0283	20.6079	48.4424	40.3262	55.9348	45.9292	4.2809
AC016266.1	0	0	0	0	0.0566	0	0	0	0	0	0	0	0	0	0	0	0	0	0	0	0	0	0	0	0	0	0	0.0337	0	0	0	0	0	0.016	0	0	0	0	0	0	0	0	0.0221	0	0.0577	0	0	0	0
RNA5SP304	0	0	0.2946	0	0.2646	0.7165	0	0	0	0.5152	0	0	0.605	0.3148	0	0	1.3888	0	0.1624	0.1174	0	0	0.4508	0	0.2236	0	0.1473	0	0	0.3315	0	0	0	0	0	0	0	0.4638	0	0	0	0.3765	0.3103	0.1528	0	0.1057	0	0.6048	0
UBL7-AS1	0.7272	2.4966	1.8547	1.0526	1.1826	1.9392	0.9558	1.9021	2.0115	1.2117	1.695	1.1839	1.7967	1.1106	1.3756	1.645	0.8728	0.3647	1.0766	1.7918	1.4673	1.4087	2.1796	0.8946	0.6527	1.5657	1.6303	1.6328	1.3722	1.4044	1.514	1.21	0.3748	0.3553	1.9946	1.566	3.1314	1.2622	1.3097	1.0676	2.2168	1.225	1.557	1.4218	1.9362	1.9865	2.1623	2.2254	1.6723
AL158209.1	0.0272	0	0	0	0.0627	0	0	0	0.0804	0	0.0379	0.3699	0.0239	0	0	0	0.0731	0	0.0385	0	0.0501	0.106	0.0267	0	0.053	0.1584	0	0	0.0829	0.0785	0	0.039	0	0	0	0	0	0	0.0319	0.0574	0	0	0.0368	0	0	0	0	0.0716	0.0911
AC010245.1	0	0	0	0	0	0	0	0	0	0	0	0	0	0	0	0	0	0	0	0	0	0	0	0	0	0	0	0	0	0	0	0	0	0	0	0	0	0	0	0	0	0	0	0	0	0	0	0	0
RN7SL188P	0	0	0.0538	0	0.1448	0	0.0765	0.0457	0.2476	0	0	0.076	0.0368	0	0	0	0	0.0561	0	0.1285	0.0772	0.0408	0	0	0	0	0.1612	0	0.0638	0.1613	0.045	0	0	0.041	0.2003	0	0	0.0846	0	0.0442	0	0	0	0	0	0	0.0816	0.2759	0
FOXO4	2.8791	5.0257	2.787	4.2987	3.073	3.0535	0.7586	5.7069	2.3744	5.6999	3.1122	2.3209	2.8109	4.9395	1.6669	2.8468	3.7852	3.7161	4.9439	3.6016	4.757	3.7743	2.7032	4.823	3.4705	2.6664	3.8528	3.3898	3.3825	3.5336	3.6291	6.7816	3.7112	2.8849	4.4755	5.2241	3.7193	3.3618	2.4203	3.9666	0.6406	0.6986	1.2171	3.4114	4.2124	5.6036	3.7814	4.2106	0.2495
AC037459.3	0.487	1.5909	1.8442	0.5733	0.7904	1.6123	0.0079	1.495	1.7126	1.955	0.9086	0.5551	0.7664	2.036	1.1884	0.9099	0.782	0.8897	1.2406	1.7401	1.1685	1.4007	1.4406	1.2061	1.1499	1.218	1.6098	1.7085	0.7342	0.8691	1.1978	1.71	1.3434	0.5651	1.8371	1.5994	0.9492	0.0921	0.9366	1.8542	0.3553	0.2492	1.0033	0.5489	1.2193	1.687	1.4164	1.9384	0.1163
ZIC1	0.0422	0.0233	0	0.5617	9.7525	0	26.4477	0.0019	0	0	1.4538	0.0175	0.0015	0	0.0026	0.012	0	0.289	0	0	0.0097	0	0.0017	0.0099	0.1981	0.0085	0	0.009	0.0107	0	0	0.005	0	0	0.0566	0	0	0.528	0.0021	0.0055	4.9926	0	0.0853	0	0.0041	0	0.0034	0	0.0029
ITM2C	144.6349	187.7293	156.2868	59.7757	168.3039	260.5538	140.7266	235.1351	318.1166	160.5348	256.1286	234.1444	318.8558	415.4202	208.5521	345.8806	361.014	178.8356	282.1276	355.3715	149.9461	267.7711	204.3068	279.1528	237.9718	223.5625	349.6813	132.4661	418.0698	314.9026	332.7204	217.1888	114.9248	299.559	272.5552	263.7866	202.4132	249.1154	209.8597	422.1191	146.3586	166.5726	265.6484	564.5389	110.7934	341.32	280.2254	440.362	154.4865
AC244230.1	0	0	0	0	0	0	0	0	0	0	0	0	0	0	0	0	0	0	0	0	0	0	0	0	0	0	0	0	0	0	0	0	0	0	0	0	0	0	0	0	0	0	0	0	0	0	0	0	0
AC010655.3	0	0	0	0	0	0	0	0	0	0	0	0	0	0	0	0	0	0	0	0	0	0	0	0	0	0	0	0	0	0	0	0	0	0	0	0	0	0	0	0	0	0	0	0	0	0	0	0	0
AP001636.1	0	0	0	0	0	0.0498	0	0	0	0.0159	0.0297	0	0	0.0584	0.008	0.0437	0	0.0285	0.0151	0.0109	0.0785	0.0311	0	0	0.0104	0.0103	0	0.011	0.0486	0.0512	0.0114	0.0305	0.0336	0.0104	0	0.0692	0	0.0322	0	0	0	0	0.0288	0	0	0.0196	0.0207	0.014	0
AC106047.1	0.2639	0.8985	0.2081	0.4264	0.327	0.1581	1.073	0.243	0.9583	0.9401	0.2828	0.8455	0.9258	0.6949	0.4116	1.0274	0.327	1.7376	0.4301	0.2487	0.7474	0.0988	0.3383	0.3907	0.3158	0.4723	0.7282	0.6474	0.3706	0.1951	0.1306	0.3774	2.0481	0.8333	0.0485	0.8785	0.4236	0.1433	0.9506	0.4061	1.7914	0.9639	0.9862	0.2428	0.8575	0.4106	0.2961	0.1869	1.6297
AC041039.1	0	0	0	0.0781	0.0257	0	0	0	0	0	0	0	0	0	0	0	0	0	0	0	0	0	0	0.0253	0	0	0	0.0688	0	0	0	0	0	0	0	0.0241	0	0	0	0	0	0	0.0903	0	0	0	0	0	0
ZBED6CL	2.8903	10.6641	3.6567	1.8267	3.5036	4.8145	2.5039	2.7769	4.1496	2.235	1.6982	1.0556	2.4919	3.6561	5.9659	4.868	2.993	2.0065	3.9618	2.5347	3.2343	4.6738	9.1672	1.3986	1.1495	3.1771	6.8574	4.3194	4.4466	4.7876	3.1988	3.3932	0.5998	2.7729	6.9774	3.3212	5.0124	0.3823	2.4769	6.4946	0.9194	2.7768	5.2374	5.7429	1.9563	4.3667	7.231	3.8977	1.3363
AC074212.1	0.9473	2.7615	1.2316	0.2898	0.6614	2.128	2.1289	0.9958	1.7503	2.3632	0.5126	1.4781	2.3473	1.9835	1.1878	3.9566	2.6727	1.8329	2.2281	5.8688	1.8539	2.3811	1.0008	6.5244	2.6068	1.2482	2.6335	1.107	1.0424	2.444	1.0155	1.5259	0.4253	5.3708	1.1362	0.9055	1.9045	0.2087	1.4967	2.2953	1.4204	0.9864	1.1419	2.4753	1.4083	1.3023	1.9275	1.3185	0.3999
ECE2	0.6551	0.2504	0.4022	0.4344	0.5333	2.7751	0.4058	0.6295	0.9503	0.6297	0.8644	0.7336	1.37	0.7896	0.7208	0.4144	0.8303	0.803	0.1882	0.7229	0.6651	0.373	0.5599	0.2913	0.1473	0.4546	0.4559	0.6946	0.2832	0.4893	0.3639	0.5768	0.163	0.799	0.3572	0.3139	0.8114	0.6865	0.7242	0.4035	1.1363	0.5618	0.5812	0.5481	0.6338	0.4514	0.5484	0.636	2.344
AP001124.1	0	0	0	0	0.0357	0	0	0	0	0	0	0	0	0	0	0	0	0	0	0	0	0	0	0	0	0	0	0	0	0	0	0	0	0	0	0	0	0	0	0	0	0	0	0	0	0	0	0	0
CDRT15P2	0	0	0	0	0	0	0	0	0	0	0	0	0	0.0394	0	0	0	0	0	0.0293	0	0	0	0	0	0	0	0.0296	0	0	0	0	0	0.0281	0	0	0	0	0	0.0303	0	0	0.0388	0	0	0	0	0	0
AC093297.1	0.0405	0.0298	0	0.0236	0.0466	0.063	0.0369	0.022	0	0	0	0.055	0.0532	0.0277	0.0304	0.0553	0.1358	0	0.1143	0.0207	0.0745	0.0591	0	0.0458	0.0197	0.0196	0.0778	0	0.0308	0.0778	0	0.0579	0.0213	0.0198	0.0724	0	0	0	0.0474	0	0	0	0.0273	0.1613	0	0.0372	0.059	0	0
AC084851.2	0	0	0	0.0383	0	0.0512	0	0	0.0485	0	0	0	0	0	0	0	0.0882	0.0439	0	0	0	0	0	0	0	0	0	0	0	0	0	0	0	0.1284	0	0.0355	0	0	0.2692	0.0346	0.6979	0	0	0	0	0	0	0	0
NRG3	0.0967	0.0904	0.0665	0.2613	2.441	6.9713	0.0945	0.0847	21.2697	1.2959	1.629	1.938	0.1261	2.0852	0.1434	3.5728	2.1769	0.5959	3.4798	1.1552	3.4065	2.588	0.104	1.711	1.5059	0.1508	3.458	0.0752	2.0442	2.6099	2.2061	3.2198	1.2636	3.1771	5.6865	0.9718	1.0822	0.5563	0.0138	2.4823	4.1915	0.8376	0.7508	6.2284	0.1964	0.997	0.2682	0.0434	1.8018
PRICKLE2-AS1	0.0018	0	0.0071	0.0021	0.019	0.0057	0	0.004	0.0027	0	0	0	0.0048	0.0025	0	0	0.0148	0	0.0052	0.0056	0.0068	0.0018	0	0.0021	0.0107	0.0036	0.0024	0.017	0	0.0018	0	0.0237	0.0077	0.0018	0.0066	0.002	0	0	0	0.0019	0	0.009	0	0	0	0	0.0018	0	0
LIPT1P1	0	0	0	0	0	0	0	0	0	0.0602	0	0	0	0	0.0076	0	0	0	0	0.0412	0	0	0.0099	0	0.0098	0	0	0	0	0	0	0	0	0	0	0	0.0162	0	0	0	0	0	0	0	0	0	0	0	0
AL138921.2	0.2896	1.8007	0.8748	0.1448	0.7616	0.3223	0.1885	0.3376	0.9155	0.309	0.317	0.7305	0.1089	0.2266	0.8077	0.0849	0.5275	0.664	0.5552	0.7392	0.7997	0.9865	1.1761	0.609	0.8649	0.782	0.4505	0.8938	0.5665	0.4573	0.377	0.5325	0.2609	0.2628	0.8148	0.7386	0.2988	0.1252	1.0656	0.3703	0.5747	0.779	3.8804	0.4949	0.3398	0.8369	0.684	0.4081	0.0692
NDUFV2	4.2208	6.5984	3.4532	8.703	5.1505	2.9549	14.8791	4.588	8.1135	3.1098	4.9034	4.8878	4.7035	4.4869	3.7521	5.0675	3.8715	7.869	6.2424	4.881	5.5857	3.2194	2.8145	7.4557	5.562	4.6899	5.3	4.0016	3.7841	3.9292	3.7255	3.8288	8.2554	8.4181	2.9058	3.7125	4.9981	4.3634	5.8346	4.0868	14.754	10.3125	6.196	5.4747	6.51	3.8645	4.615	3.37	14.8486
AL136126.1	2.6769	1.7992	3.1253	5.8657	2.9087	1.3902	12.0345	1.8448	2.5449	3.9544	3.1078	5.9245	2.9476	3.258	3.149	2.1562	2.8744	3.978	2.0167	3.3099	2.7375	1.1	1.1662	4.0749	0.5495	3.2002	3.9629	3.5492	1.5837	2.1438	1.7854	0.9784	8.9089	6.1334	1.4555	2.8962	2.4349	2.5197	4.3525	3.7582	3.8399	5.5519	5.8201	4.3086	3.5247	2.8441	2.9213	1.8776	18.1567
FUT9	0.0087	0	0.0391	0.0041	3.7773	0.0584	0	0.0019	0	0.4882	0	0.0245	0.0008	0.0024	0.0124	0.0048	0.1451	0.0012	0.261	0	0.0016	0.0008	0.0299	0.0553	0.1703	0.0034	0	0.7674	0.0133	0.5344	0.0243	0.0012	0	0.0009	0.0083	0.0311	0	0.1028	0	0.1395	1.1309	0	0.0071	0.0336	0.0286	0.0016	0.0042	0.0138	0.5816
AC007496.2	0.2186	0.2258	0.4202	0.153	0.3772	0.0341	0.5578	0.0951	0.2257	0.1306	0.2436	0.2771	0.0575	0.2095	0.2462	0.1196	0	0.2046	0.0926	0.3571	0.5231	0.2127	0.1928	0.198	0.2338	0.5721	0.028	0.2473	0.0998	0.1891	0.0703	0.2814	0.1378	0.0427	0.0261	0.2365	0.0702	0.0661	0.128	0.046	0.4287	0.1074	1.0029	0.0291	0.0513	0.0804	0.085	0.2587	0.0731
AC093392.2	0	0	0	0	0.0408	0	0	0	0	0	0	0	0	0	0	0	0.0476	0	0	0	0	0	0	0	0	0	0	0.0365	0	0	0	0.0507	0	0	0	0	0	0	0	0	0	0	0.814	0.0472	0	0	0	0	0
AC003684.1	0.007	0	0	0.0244	0.016	0	0	0	0.0103	0.0104	0	0.0063	0.0061	0.0191	0	0	0	0.028	0	0	0	0.0068	0	0	0	0	0	0.0072	0.0106	0	0	0	0	0.0545	0	0	0	0	0	0	0.0114	0	0.047	0	0.0082	0	0	0	0
EIF3J	19.7894	24.3002	19.6857	32.2112	23.6467	26.4134	34.5605	18.6056	25.7491	14.7197	25.5475	23.5184	22.4557	22.1515	19.7627	18.8784	17.9522	28.7199	23.1854	22.0721	27.1695	19.3258	19.7913	19.1102	21.7158	24.8778	23.6267	26.5205	19.2597	25.111	17.7191	21.7032	21.4825	27.2988	21.6099	21.836	24.3764	28.4834	28.2366	16.629	29.4047	24.5535	22.8324	27.3895	28.6555	22.5891	22.5343	24.0474	18.057
LCE3E	0	0	0	0	0	0	0	0	0	0	0	0	0	0	0	0	0	0	0	0	0	0	0	0	0	0	0	0.0201	0	0	0	0	0	0	0	0	0	0	0	0	0	0	0	0.026	0	0	0	0	0
KPNA5	3.4992	7.4743	5.5264	8.92	9.5202	7.2827	8.3427	4.297	5.4955	4.3336	3.2051	5.3953	5.8829	8.3213	4.7879	10.0613	6.5858	5.3651	14.2387	6.5056	8.2239	9.8546	3.0842	6.2988	9.3825	8.6174	4.8827	5.3905	6.1482	6.5976	5.9471	7.042	5.9574	9.1405	11.4816	5.5997	3.4716	5.836	6.228	8.9054	16.6983	9.6585	4.9923	7.9253	4.5451	5.6689	9.43	5.1907	6.9069
PRKAG1	9.3586	10.8302	11.6864	10.1582	7.6241	8.4355	8.6719	8.2044	16.3033	8.0212	9.2431	8.8535	9.3307	11.8223	15.3646	7.7502	7.7143	8.8101	13.0082	8.6704	10.6329	9.0751	9.0684	9.9456	9.2372	11.0584	9.7133	9.3814	12.6679	7.0141	8.7125	9.1619	7.9159	8.0459	10.1708	14.3022	8.4588	11.7064	9.9945	9.0694	10.2632	9.6084	10.8905	9.2358	8.9853	9.898	9.5296	9.8505	12.5356
OTX2-AS1	0.1112	0.0905	0.0147	0	0.0574	0	0.2097	0.0083	0.0792	0.1088	0.0214	0	0.0034	0.3045	0.0777	0.0052	0.0154	0.0462	0.0271	0.1723	0.1835	0.0933	0.8195	0.0174	0.0037	0.052	0.0246	0.0276	0.07	0.0074	0.0288	0.1481	0.0887	0.0187	0.0732	0.0581	0	0.0155	0	0.0404	0.1128	0.044	0.1604	0.0255	0.0045	0.0776	0.0112	0.0454	0.0192
AP001011.1	0.0114	0.1009	0.0584	0	0.0918	0.0355	0	0.0248	0.0504	0.0341	0.0476	0.031	0.02	0.0312	0.0086	0.078	0.0306	0.061	0.0161	0.0698	0.0629	0.0333	0.067	0.0645	0	0	0.0146	0.0469	0.0173	0.011	0.0122	0.0489	0.024	0.0111	0.0272	0.0123	0	0.023	0	0.012	0	0	0.2615	0.0151	0.0802	0.0314	0.0222	0.045	0
EDARADD	2.2784	2.9023	2.2946	0.1386	0.5243	3.3649	0.0526	1.0056	2.3623	0.4171	0.8629	2.2401	2.0657	0.3076	0.9084	1.5494	0.6418	2.0429	3.6218	3.8102	4.6902	2.2643	1.7207	6.6419	8.7395	1.6206	3.0463	2.4494	1.733	3.2999	1.4895	5.8607	0.5295	1.5336	2.2445	3.4164	5.769	0.3495	1.5516	4.5751	0.8968	1.4607	1.4767	1.1046	2.7335	2.6967	4.6591	1.8527	0.5313
AC078899.3	0.0564	0.0832	0	0	0.1298	0	0	0	0.1664	0	0	0	0	0.0772	0	0	0	0	0.239	0	0	0	0	0.2554	0	0	0	0.058	0.0858	0	0	0	0	0.2756	0.0673	0	0	0.1138	0	0	0	0	0.7611	0	0.1985	0	0	0.1483	0
NOL10	7.8513	7.7226	9.5841	6.3925	7.6374	8.657	4.9807	9.0502	9.9265	9.1596	10.0802	8.1051	9.6607	11.7478	11.9244	8.4853	7.4535	8.8991	9.6593	7.987	8.9904	9.0503	8.4534	9.8987	10.3488	10.1868	10.2628	11.4667	7.6724	11.1964	8.329	9.3104	5.1034	9.2407	9.0351	9.3369	10.2788	8.678	11.3915	10.7858	4.6653	4.9559	12.4351	5.826	10.2614	11.1315	9.0338	11.0493	1.2498
RNU6-1177P	0	0.6785	0.7366	0	0.1323	0	0	0.2502	0.1696	0	0	0.3123	0	0	0.0863	0	0.1543	0.3075	0.1624	0.2348	0.6349	0.1119	0	0.1302	0.1118	0.1114	0.1473	0	0	0	0	0.3289	0	0.1124	0	0	0	0	0	0.2421	0	0	0.3103	0.1528	0	0	0.2236	0	0
RPS29P32	0	0	0	0	0.3527	0	0	0	0	0.229	0	0	0	0	0	0	0	0	0	0.1565	0	0	0	0.5207	0	0	0	0	0	0	0	0	0	0.1498	0	0.1659	0	0	0	0	0	0	1.4481	0	0	0	0	0	0
LCP2	1.9807	1.0886	1.8824	1.4523	1.1907	1.2498	0.6017	0.8711	0.599	1.0948	0.5588	1.1926	0.6051	0.5921	0.7114	1.2621	0.8419	1.9493	0.851	0.2882	2.0326	3.2145	0.9481	1.9306	0.544	1.0096	1.0213	1.3498	1.3258	1.4514	1.3004	1.9546	0.8535	1.4212	1.7455	1.2697	0.3391	1.6529	1.6637	0.3615	1.5645	1.0946	0.7351	0.3576	0.7146	1.2004	0.7351	1.0398	0.6073
RF00108	0	0	0	0	0	0	0	0	0	0	0	0	0	0	0	0	0	0	0	0	0	0	0	0	0	0	0	0	0	0	0	0	0	0	0	0	0	0	0	0	0	0	0	0	0	0	0	0	0
AL162384.1	0	0.0354	0	0	0	0	0	0	0	0	0	0	0	0.0328	0.036	0	0	0	0.0338	0	0	0.0466	0	0.0271	0	0	0	0.0493	0.0365	0	0	0	0.0252	0.0234	0	0.0259	0	0	0.0281	0	0	0	0.4204	0	0	0	0	0	0
AC022098.2	0.1154	0.1362	0.2366	0	0.0266	0.1079	0	0.1758	0.2043	0	0.0965	0.4389	0.2024	1.3906	0.2426	0.5367	0.4957	0.2161	0	1.0369	0.085	0	0.0226	0.0784	0	0.0671	0.3253	0.0712	0.0702	0.2884	0.1732	0	0.0485	0.4737	0.0551	0.0499	0.2223	0.2328	0.1892	0.0486	0	0.0756	0.1246	0.3068	0	0.2547	0.5387	0.3036	0.0772
MIR8056	0	0	0	0	0	0	0	0	0	0	0	0	0	0	0	0	0	0.7801	0	0	0	0	0	0	0	0	0	0	0	0	0	0	0	0	0	0	0	0	0	0	0	0	0	0	0	0	0	0	0
SYNGAP1-AS1	0.3684	0.4529	0.236	1.003	0.1413	0.1913	0.0839	0.0334	0.1585	0.3898	0.1925	0.2779	0.3634	0.1891	0.2881	0.3569	0.2678	0.39	0.2168	0.5328	0.4803	0.254	0.2257	0.7473	0.3731	0.6546	0.118	0.2368	0.0233	0.1623	0.181	0.1756	0.2097	0.12	0.3847	1.096	0.0985	0.0619	0.2875	0.404	0.2007	0.2011	0.3107	0.1428	0.7564	0.0282	0.3582	0.2422	0.2567
AC108868.2	0.0234	0.069	0.06	0	0	0.0365	0.0426	0.0255	0	0.1398	0.652	0	0	0	0.3338	0.032	0.0314	0.1252	0	0.0956	0	0	0	0.053	0.091	0.0227	0.03	0.0963	0	0.0899	0	0	0	0.0229	0	0.0759	0	0.0472	0	0.0246	0.0765	0.0383	0.0947	0.0311	0.0824	0.0215	0	0	0
PDE6C	0.177	0.1972	0.2037	0.2108	0.2452	0.1238	0.4806	0.1258	0.2078	0.3777	0.1661	0.2224	0.0824	0.2572	0.3553	0.0988	0.1406	0.4155	0.3317	0.354	0.266	0.102	0.1133	0.1513	0.1229	0.3922	0.125	0.1932	0.1374	0.1909	0.1123	0.1757	0.4821	0.413	0.138	0.2306	0.0986	0.1166	0.2114	0.2244	0.2302	0.2602	0.7605	0.2064	0.1229	0.1661	0.0773	0.1615	0.0846
CHAF1A	5.9436	10.5585	10.7919	1.8694	9.9359	10.1662	2.5447	8.9944	13.0969	15.8548	10.4582	9.0277	5.8175	11.6341	18.8789	7.2739	7.6379	6.5507	9.311	7.4907	5.944	12.311	10.8892	9.0947	7.0717	13.1726	10.5541	11.3127	12.1305	12.8087	13.4073	5.6285	3.6772	4.822	12.1366	7.9141	19.0808	3.3659	10.5203	14.5111	4.018	2.6505	7.8595	10.3017	7.509	13.5149	12.0413	12.4804	1.0466
AP003500.1	0	0	0	0	0	0	0	0	0	0	0	0	0	0	0.017	0	0	0	0	0	0	0	0	0	0	0	0	0	0	0	0	0.0324	0	0	0.0542	0	0	0	0	0	0	0	0	0	0	0	0	0	0
DUX4L10	0	0	0	0	0	0	0	0	0	0	0	0	0	0	0	0	0	0	0	0	0	0	0	0	0	0	0	0	0	0	0	0	0	0	0	0	0	0	0	0	0	0	0	0	0	0	0	0	0
SNORD107	0	0	0	0	0	0	0	0	0	0	0	0	0	0	0	0	0	0	0	0	0	0	0	0	0	0	0	0	0	0	0	0	0	0	0	0	0	0	0	0	0	0	0	0	0	0	0	0	0
AL139193.1	0	0.0982	0.1137	0.0518	0.0255	0	0	0.0966	0.0655	0	0	0.0402	0.0389	0.0304	0	0	0	0.0297	0	0.1132	0.0408	0.0648	0.0652	0	0.0431	0.0215	0	0.0685	0	0.064	0.1189	0.0952	0.0233	0	0	0.048	0	0	0	0.0234	0	0	0.0299	0.0295	0.0521	0.102	0.0431	0.0583	0
LIMD2	7.925	4.4131	9.3061	1.9231	10.2515	8.3587	4.1609	6.8247	11.4049	6.5423	12.1468	7.2666	9.1712	9.4813	8.9912	4.9702	6.5885	8.3783	2.4275	9.4956	6.1414	4.0294	10.3078	6.7876	2.0777	9.57	12.3868	11.2836	3.3695	7.5266	9.5756	3.8237	2.8337	19.0143	6.4633	8.9641	9.2625	4.061	12.9328	6.9358	6.2676	4.9759	4.4139	6.8887	10.7532	4.9812	7.5768	12.6495	0.7754
SNORD21	0	0	0	0	0	0	0	0	0	0	0	0	0	0	0	0	0	0	0	0	0	0	0	0	0	0	0	0	0	0	0	0	0	0	0	0	0	0	0	0	0	0	0	0	0	0	0	0	0
AC006058.3	1.0626	0.0495	0.5876	0.0783	0.4761	0.0349	0.1223	0.9615	0.0825	0.2005	0.4831	0.1114	2.5995	0.2297	0.6131	0.1071	0.045	0.5385	0.0158	0	0	0.0327	2.9274	0.0127	0.0435	0.271	0.043	0.046	0.1191	0.0645	0.024	0.048	0.2704	0.0109	0.4806	0.0484	0.0359	0.2707	0.7988	0.0353	0.8591	0.0549	0.6641	0.1635	0.0262	0.0411	0.0544	0.7502	0.0374
PPIAP77	0	0.0354	0	0.1398	0.1378	0.0747	0	0.0261	0.0707	0	0.0334	0	0	0.0328	0.036	0	0	0	0.0338	0	0	0.0233	0.047	0.0543	0.1165	0.0232	0	0.1479	0	0	0.1027	0.0685	0	0.0468	0.0286	0.0518	0	0.0242	0.0561	0	0.1175	0	0.1617	0.0318	0	0.022	0.0466	0	0.0801
AC134698.3	0	0	0	0	0	0	0	0	0	0	0	0	0	0	0	0	0	0	0	0	0	0	0	0	0	0	0	0	0	0	0	0	0	0	0	0	0	0	0	0	0	0.0915	0	0	0	0	0	0	0
TBX1	1.0808	1.2464	0.0701	20.5498	2.5853	0.016	32.4077	0.5806	4.3542	0.0613	14.5615	0.2787	0.039	0.1639	0.1387	0.0094	0.0918	15.3284	0.1304	0.192	0.2266	0.0333	1.341	0.3292	0.1031	0.4409	0.2059	2.8779	0.0572	0.0657	0.1027	0.1614	0.6182	0.8089	0.1878	0.2257	0.3788	2.3075	0.0841	0.0288	1.0284	0.2296	0.0969	0.3	5.0603	0.022	0.1397	0.1979	0.0286
IGHV5-51	1.0499	0.043	0.5979	0.3403	1.4428	0.0454	0	0	0.1291	0	0.9345	0.0792	2.4041	0.559	0.0876	0.3191	22.1156	0	0.0412	0	0.4295	2.8383	0.2287	0	0	0.0283	0.3736	0.63	3.4604	0.028	4.1264	0.2502	0	0.057	0.174	0	0	1.2647	0	0	0.143	0.3343	0.3936	0.8914	0.1369	0.0268	0.0567	0.652	0.2926
AC022001.3	0.0201	0.0888	0.1542	0	0.2077	0.0313	0.0731	0.0873	0.2072	0.03	0.1677	0.0908	0	0.0275	0	0.0823	0	0.0537	0.1134	0.041	0.1108	0.0195	0.0983	0.0681	0	0.0583	0.0771	0.0206	0	0.135	0.0215	0.0574	0.0211	0.0196	0.0958	0.0868	0	0.0202	0	0.1267	0	0.1314	0	0.0267	0.0471	0.0922	0.1171	0.1055	0
RF00096	0.3651	0.6733	0.7018	0.213	0.315	0.5688	0	0.4966	0.2693	0.409	0	0.3306	0.4002	0.2499	0.0685	0.4994	0.1225	0.7324	0.5157	2.05	0.6721	0.7995	0.4474	0.4134	0.71	0.7078	0.4677	0.2817	0.1389	0.7895	0.0978	0.9138	0.1919	0.0892	0.4358	0.395	0	0	0.1069	0.865	0.7458	0.1494	0.1232	0.3639	0.1071	0.6714	0.4438	0.4801	0
LINC01047	0	0	0	0.118	0.0291	0	0	0	0	0	0.0176	0	0	0	0	0	0.017	0.0169	0	0	0	0	0	0.0429	0	0	0	0.026	0	0	0	0	0.0133	0.0124	0	0	0	0	0	0.0133	0	0.0207	0.3411	0	0	0	0	0	0.0211
ADAMTS6	0.3908	0.4963	0.3005	0.2459	1.1321	0.0805	1.0887	1.1208	0.8606	0.6359	0.1886	0.1984	0.1616	0.686	0.3186	0.1661	0.2548	0.3472	1.033	0.2479	0.5703	0.7267	0.3174	0.354	0.1479	1.5382	0.6955	0.2168	0.9193	0.2159	2.1514	0.7864	0.2948	1.3449	0.8479	1.8981	0.2106	0.2294	0.2075	1.352	0.5406	0.4113	0.3579	2.7192	0.0868	0.1861	0.2972	0.4791	0.1844
IPMKP1	0	0	0	0	0	0	0	0.0152	0	0.0418	0	0	0.0123	0	0	0	0	0	0.079	0.0143	0	0.0136	0.0137	0.0317	0.0408	0	0.0358	0	0	0	0	0	0	0	0.0501	0.0151	0	0.0141	0	0.0589	0	0	0.0189	0	0	0.0643	0.0544	0	0
AL662899.2	0.0261	0.2955	0.1283	0.0813	0.1002	0.0678	0.0238	0.1232	0.1092	0.0911	0.1517	0.1774	0.0993	0.0894	0.1046	0.0715	0.0292	0.0349	0.0431	0.0845	0.0962	0.0763	0.0896	0.0986	0.0466	0.3461	0.1171	0.1702	0.106	0.0879	0.042	0.0436	0.0183	0.0426	0.1767	0.2827	0.1398	0.0615	0.1937	0.0963	0.0712	0	0.1234	0.1447	0.1379	0.0761	0.1355	0.1203	0
RN7SL748P	0.1153	0.4538	0.2463	0	0.0442	0.0599	0	0.2092	0.0567	0.0574	0	0.1044	0.0337	0	0.0577	0.2629	0.1032	0.0514	0.2715	0.2355	0	0.0748	0.1131	0.0871	0.1121	0.1118	0.0985	0.1582	0.1755	0.0369	0.1236	0.11	0	0.0751	0.2753	0.208	0.0617	0	0.045	0.081	0	0.063	0.7264	0	0	0.0353	0.1122	0.1011	0
OR9I3P	0	0	0	0.0148	0	0	0	0	0	0	0	0	0	0	0	0	0	0	0	0	0	0	0	0	0	0	0	0.0131	0	0	0	0	0	0	0	0	0	0	0	0	0	0	0	0	0	0	0	0	0
AC111000.6	0	0	0	0	0	0	0	0	0	0	0	0	0	0	0.1013	0	0	0	0	0	0	0	0	0	0	0	0	0	0	0	0	0	0	0	0	0	0	0	0	0	0	0	0	0	0	0	0	0	0
CKS1BP3	0.0505	0.1489	0.3879	0.1177	0.058	0.0786	0.6436	0.549	0.2233	0.4522	0.2109	0.3197	0.177	0.0691	0.2652	0.345	0.3386	0	0.3563	0.1545	0.3715	0.6874	0.1978	0.5712	0.2453	0.5379	0.3232	0.9342	0.307	0.3879	0.2163	0	0.053	0.2958	0.3613	0.2729	0.5669	0.2544	0.1181	0.1594	0.0824	0.3304	0.8851	0.2682	0.1776	0.4639	0.5887	0.3317	1.0969
CICP5	0.0054	0.0239	0.0069	0	0	0.0252	0	0.0059	0	0.0081	0	0	0.0095	0.037	0	0	0.0145	0	0.0153	0.0165	0.0099	0.0105	0.0159	0.0061	0.042	0.0052	0.0069	0.0167	0.0164	0.0156	0.0058	0	0	0.0211	0.0193	0.0175	0	0	0.0126	0.0398	0	0	0.051	0.0072	0.019	0.0149	0.0262	0.0071	0
MIR548A3	0	0	0	0	0	0.1921	0	0	0	0.5524	0.1717	0	0	0	0	0	0	0	0	0	0	0.2399	0.1208	0	0.1199	0.1195	0.1579	0	0.375	0.1185	0	0.3526	0	0	0	0.1334	0.1979	0	0	0.5192	0	0	0.3327	0	0.2893	0	0	0	0
KRT18P36	0	0	0	0	0.0108	0	0.1537	0	0.0138	0	0	0.0085	0.0082	0.0128	0.0141	0	0.0126	0.0376	0	0	0	0	0	0	0.0091	0.0091	0.012	0.0096	0	0	0	0	0.0394	0.0092	0	0	0	0	0	0	0.0153	0.0153	0.0253	0.0249	0.011	0.0086	0	0	0.0157
AL512271.1	0	0	0	0	0	0	0	0	0	0	0	0	0	0	0	0	0	0	0	0	0	0.0268	0	0	0	0	0	0	0	0	0	0	0	0	0	0	0	0	0	0	0	0	0	0	0	0.0253	0	0	0
AC013403.2	0.6477	1.4333	0.8618	0.1163	0.9171	1.1643	0.3178	0.5963	1.7272	0.5582	0.8676	0.7668	0.5243	0.9891	1.1784	0.6814	0.4681	1.366	1.2315	2.1362	1.559	0.7273	0.6105	0.6769	0.6297	0.7244	1.3084	1.3325	0.4926	0.9336	0.4539	1.2113	1.4137	1.8745	0.6541	0.9972	0.2799	0.3768	1.1956	1.6	1.0177	0.6526	1.6808	0.927	0.5553	0.71	0.7509	1.5397	0
AC010643.1	0.3371	0.5298	0.3944	0.0428	0.5944	0.274	3.8068	0.5223	1.2217	0.9087	0.8628	0.4147	0.7102	1.9317	1.3977	0.416	0.541	0.7596	0.352	0.6697	1.3963	0.1712	0.6106	0.2365	0.1069	1.0159	1.0328	0.7916	0.8362	0.1409	0.9506	0.3459	0.027	2.7754	0.4505	1.3995	0.247	0.3363	1.2655	0.2276	0.2036	0.402	0.6181	0.6526	0.589	0.0876	0.5131	0.8385	0.4964
PIAS4	6.4703	6.4159	9.3208	4.5807	7.8291	7.5621	2.2354	7.6899	8.8195	10.2535	8.0183	8.9076	5.3638	9.9145	11.8516	6.9483	9.1599	9.7546	7.9167	6.2475	7.8235	9.2528	8.8982	7.5897	8.4594	9.0438	11.268	7.8501	8.2516	8.5757	10.9995	6.7726	5.1492	10.9675	8.6073	8.8241	9.3698	3.8596	11.08	9.6583	3.296	3.5923	5.4346	13.1317	6.5413	8.117	8.9709	10.7046	1.1463
POP4	3.3193	2.8016	3.4797	4.1493	3.0845	3.6358	2.0121	3.0498	5.1382	5.5427	4.8753	4.5401	4.0084	4.2012	4.9615	3.152	3.1736	5.0451	3.8331	4.2188	5.2363	4.4519	3.3875	4.094	3.1372	3.7905	4.8536	3.755	4.2859	3.6042	4.1859	4.4715	12.5681	6.6479	2.7439	4.6932	3.9734	3.8629	5.2891	5.5883	3.8907	5.4707	3.2939	5.6611	3.4166	4.4215	3.8186	3.7554	4.8761
RBM12	9.6446	14.8853	21.5607	6.1831	19.7482	25.0865	8.5712	16.4135	17.589	10.9882	17.2918	14.5022	12.3965	20.4583	16.7234	10.3175	13.2037	11.1216	15.9344	12.0523	15.215	22.9788	28.0619	15.5905	25.1733	14.4072	24.6936	24.5793	20.3687	24.7256	21.8837	17.1182	8.3756	18.6108	21.4705	15.0732	18.591	12.4866	18.6366	23.6208	12.1724	14.3869	17.3659	16.0257	11.6596	29.5964	22.4828	20.7107	10.8788
RN7SKP31	0	0	0	0	0	0	0	0	0	0	0	0	0	0	0	0	0	0	0	0	0	0	0	0	0	0	0	0	0	0	0	0	0	0	0	0	0	0	0	0	0	0	0	0	0	0	0	0	0
ABCC6	0.3053	0.2124	0.9729	0.3083	0.6242	0.3056	0.3315	0.284	0.2987	0.4419	0.4474	0.2936	0.7963	0.758	0.405	0.6902	0.2866	0.3427	0.1832	0.2875	0.5794	0.1124	0.4884	0.2418	0.1507	0.6593	0.5613	0.3645	0.2791	0.7844	0.8342	0.3077	0.2327	0.2628	0.3549	0.8283	0.1016	0.2074	0.7129	0.1965	0.2869	0.2642	0.3373	0.1472	0.3229	0.2167	0.1369	1.0048	0.1138
FAM27C	0.0582	0.315	0.0995	0.3171	0.6923	0.3327	0.0354	0.2746	0.2291	0.174	0.4327	0.4569	0.2894	0.3987	0.0874	0.292	0.495	0.3115	0.1645	0.3963	0.393	0.17	1.6554	0.1758	0.1887	0.6397	0.1741	0.1398	0.502	0.2425	0.4994	0.4442	0.1428	0.1707	0.695	0.336	0.2804	0.0979	0.3409	0.2453	1.2054	0.7628	0.3929	0.3611	0.5921	0.3391	0.9249	0.3319	0.0325
AL591684.2	0.0883	0.532	0.528	0.0515	0.1862	0.3554	0.0939	0.1601	0.2497	0.066	0.0308	0.2198	0.2194	0.2216	0.1271	0.3321	0.158	0.0394	0.3118	0.5935	0.2032	0.3008	0.2452	0.1583	0.3792	0.1284	0.2074	0.3633	0.1679	0.2687	0.3944	0.1158	0.116	0.0719	0.404	0.4777	0.2008	0.141	0.0603	0.3177	0.0361	0.0964	0.278	0.1173	0.1468	0.2706	0.2934	0.2322	0.0861
TM4SF20	0.013	0.0064	0.0278	0	0.0299	0	0	0.0094	0.0512	0.0324	0.0181	0.0353	0.0114	0.0119	0.0228	0	0.0233	0.0058	0.0306	0.0133	0.0559	0.0211	0.034	0.0147	0.0337	0.0084	0.0333	0.0223	0.0462	0.0333	0.0046	0.0496	0.0912	0.0339	0.0311	0.0188	0	0	0.0152	0.0776	0	0.0142	0.0995	0.0173	0.0254	0.0159	0.0127	0.0342	0
INSYN1	1.1879	0.1557	0.7902	0.1974	1.959	0.5073	0.0564	0.3325	1.2398	0.3261	0.2458	0.3426	0.0941	0.1395	0.3292	0.0722	0.1245	0.7542	0.1336	0.2321	3.3217	0.1328	0.2229	0.1689	0.3024	0.3156	0.1119	0.6606	0.202	0.8129	0.0702	7.9245	0.5563	0.0711	0.1129	0.618	0.1489	0.51	0.3173	0.0172	0.3954	0.1638	0.1669	0.1982	0.1814	0.1856	0.1875	0.4545	0.0396
CBLL2	0	0	0	0	0.0091	0	0	0	0.0116	0	0	0.0071	0	0.0108	0	0	0	0	0	0.0081	0.0291	0	0	0.0179	0	0.0077	0	0.0406	0	0	0	0	0	0.0154	0	0	0	0.008	0	0	0	0	0.0213	0.0105	0.0185	0	0	0	0.0132
FAM104B	12.8897	7.7299	8.2035	5.6	8.6206	9.6464	8.9471	5.149	13.3192	16.8251	10.2121	10.1759	8.9167	10.7899	8.5073	5.8704	7.6421	12.8944	9.4011	11.4549	20.4861	7.2597	6.0034	7.4815	6.8479	8.107	9.4887	8.2786	7.679	9.9873	7.3188	12.3103	14.2457	13.7101	6.0876	12.6051	7.6032	9.5154	9.3207	8.4286	14.4341	13.7961	9.272	14.9177	9.757	16.356	7.947	8.413	20.9975
AC087565.1	0	0.45	0	0	0.1053	0	1.8901	0	0.18	0.2278	0	0.0552	0	0	0.1832	0.0834	0	0.0408	0	0.1557	0.393	0.0594	0	0.1036	0.1186	0	0	0.0314	0	0	0	0.0872	0	0.0298	0	0	0.0979	0	0.0357	0	0.6979	0.0999	0.4528	0	0.0358	0	0	0	0.153
AGTR1	0.3128	0.1775	2.9912	0.3049	4.0107	2.0675	0.3008	0.1384	0.6339	3.2662	1.7578	1.0832	0.009	0.5649	0.0645	0.1176	0.383	4.1611	0.6361	0.0562	0.443	0.1071	3.7002	4.2545	0.7955	0.8098	0.3788	0.053	0.272	4.0671	0.3022	2.0109	0.0361	0.2789	0.6483	0.331	0.1876	1.3036	12.3638	0.2136	1.3427	2.0377	2.5748	2.4946	0.0242	0.8629	1.0798	3.0066	0.6152
AL031055.1	0.0758	0.1118	0.2671	0.0663	0.1744	0.0295	0	0.0206	0.1398	0.0566	0.0792	0.1544	0.0332	0.0519	0.1423	0.0518	0.2035	0.3801	0.0803	0.0193	0.2442	0.166	0.0743	0.1502	0.129	0.1102	0.1457	0.1559	0	0.0728	0	0.1626	0.0797	0.2593	0.0678	0.041	0.0304	0.0955	0.1109	0.0399	0.2168	0.1551	0.0767	0.1259	0.1556	0.1742	0.129	0.0997	0.0951
TPST2P1	0.0109	0.016	0.0278	0	0	0.0169	0	0.0118	0.016	0.0324	0	0	0.0095	0	0	0	0.0146	0	0.0307	0.0443	0	0.0106	0.0213	0	0	0	0	0.0335	0	0.0209	0.0233	0	0	0	0	0	0	0	0	0.0457	0	0	0.0879	0	0	0.01	0	0.0285	0
LINC00159	0.0836	0.0925	0.2143	0.2439	0.1443	0.0651	0.3429	0.0455	0.0308	0.1561	0.0582	0.1325	0.1833	0.0859	0.1256	0.0572	0.3086	0.2796	0.3543	0.2348	0.1154	0.0814	0.041	0.1657	0	0.0203	0.0536	0.172	0.0318	0.1004	0.112	0.1495	0.5053	0.3473	0.1247	0.0678	0.0336	0.0843	0.2447	0.044	0.2733	0.0342	0.2821	0.1945	0.0736	0.0769	0.0407	0.1375	0.3496
AC008088.1	0	0	0	0	0	0	0	0	0	0	0	0	0	0	0	0	0	0	0	0	0	0	0	0	0	0	0	0	0	0	0	0	0	0	0.051	0	0	0	0	0	0	0	0	0	0	0	0	0	0
HS6ST2-AS1	0	0.0321	0.0279	0	0.05	0	0	0	0.0321	0.0325	0	0	0.0191	0.0298	0.0653	0	0.0292	0	0	0.0222	0	0.0212	0.0213	0	0	0.0211	0	0.0671	0	0	0	0.0311	0	0	0	0	0	0.0219	0	0	0.0355	0	0	0	0	0.02	0	0	0
CNN2P3	0	0	0	0.0462	0.1518	0.0206	0	0.1005	0.0195	0	0	0	0	0	0	0	0	0	0.0186	0.0539	0	0	0.0129	0	0	0.0384	0.0338	0	0	0.0127	0.0141	0	0.0277	0	0	0.0143	0	0	0	0.0139	0	0	0.1247	0.0351	0	0	0	0	0
AC007598.1	0.0267	0.1575	0.2394	0.0311	0.0307	0	0	0.029	0.1969	0.2392	0	0.0242	0.0702	0.1462	0.02	0.1095	0	0	0.0377	0.0817	0.1965	0.1299	0.2093	0	0.1038	0.1035	0	0.0549	0.0406	0.0769	0.0286	0.1145	0.1402	0	0.0637	0.0289	0	0	0.0625	0.0281	0.0436	0.0437	0.1441	0	0.0313	0.0736	0.026	0.1053	0
RNY1P14	1.1071	0.9801	0.1419	0	0.3821	0	0	0.1205	0.6533	0	0	0.8019	0.0971	0	0.0831	0.1514	0.4458	0.1481	0	0.113	0	0.2155	0.1085	0	0	0.3219	0	0.3417	0	0	0.1187	0.1583	0.1164	0	0	0.1198	0	0	0.3888	0.1166	0.5428	2.1753	0	0	0	0.1018	0.1077	0.2912	0
AC111182.1	0.042	0.0619	0.0538	0.0694	0.0201	0.0545	0.1657	0.0989	0.0413	0.0731	0.0487	0.0475	0.1165	0.067	0.0394	0.0574	0.0563	0.1076	0.0346	0.1071	0.1867	0.0306	0.0651	0.0515	0.0204	0.0712	0.0717	0.0935	0.0851	0.0437	0.0562	0.035	0.1176	0.0923	0.0417	0.0984	0.0617	0.0529	0.0573	0.0479	0.0743	0.0573	0.0614	0.0744	0.119	0.0418	0.0476	0.0828	0.0585
RBM18	5.7101	7.4906	10.1909	8.8181	10.0373	12.2187	8.439	10.004	8.1724	9.1698	9.3731	9.6896	10.9202	10.0821	7.0866	12.5566	8.3101	8.9335	16.4146	9.0172	9.3244	11.87	8.931	10.7304	8.3885	7.6062	11.2091	10.3528	17.6254	10.7054	8.7594	10.5374	5.3454	6.9307	10.8634	15.7215	5.3848	12.8455	9.3939	21.8731	8.7898	8.4449	7.9731	14.0668	11.225	9.2703	12.7604	10.5196	9.2265
MTND1P5	0	0	0	0	0	0	0	0	0	0	0.0354	0	0	0	0	0	0	0.017	0	0	0	0.0124	0.0125	0	0	0	0	0.0262	0	0	0	0	0.0267	0	0.0304	0	0	0	0	0.0134	0	0	0	0	0	0	0	0	0
GUSB	16.6771	12.599	11.1344	14.746	9.2905	8.8993	7.244	8.9268	15.2927	12.8592	9.3764	10.9369	9.7716	10.1625	25.0671	17.0881	12.9731	10.8881	16.8937	14.0785	13.0559	10.7625	12.0613	11.5712	9.5958	12.1127	11.7188	11.7729	11.2225	14.0988	13.7256	12.0927	9.346	12.4025	13.002	10.1689	13.7549	11.7049	12.9388	8.3008	10.7244	10.3235	16.2893	9.2071	9.682	11.8224	13.378	9.9698	4.6737
KCND1	1.3157	0.3524	0.876	0.1201	1.5754	0.4555	0.1614	0.5556	0.5073	0.5506	0.4274	0.5761	0.316	0.7105	0.4963	0.5098	0.5472	0.694	0.3432	0.6138	0.2691	0.7715	0.4945	0.429	0.6527	0.475	0.3614	0.5443	0.6985	0.5659	0.4172	0.2297	1.1361	0.328	0.3146	1.7399	0.152	0.8555	0.4242	0.464	0.387	0.2562	0.6363	0.6485	0.3527	0.3654	0.2523	0.5091	0.1481
AACS	1.7169	1.3822	2.5286	1.5007	1.3548	1.8104	0.8774	1.7171	2.1405	0.8468	2.2564	1.9675	1.8126	1.713	2.6509	0.8099	1.5336	1.401	1.0935	1.9091	1.6069	1.5148	2.0486	0.9026	0.9716	1.176	1.5638	1.8097	2.153	1.6365	1.31	1.8467	0.7277	1.0717	0.8752	4.3188	0.8658	1.6858	1.5977	1.4597	1.0089	1.1021	2.1044	1.094	1.6606	1.2767	1.1328	1.8379	0.3355
IGHV3-36	0	0	0	0	0	0	0	0	0	0	0	0	0	0	0	0	0	0	0	0	0	0	0	0	0	0	0	0	0	0	0	0	0	0	0	0	0	0	0	0	0	0	0	0	0	0	0	0	0
TNFAIP2	8.4284	14.4876	14.1976	4.6999	5.7691	9.6907	2.3053	7.2982	9.1615	4.3721	8.6221	7.7259	12.3877	19.8516	3.865	5.7334	13.3455	7.0816	13.5344	14.7024	9.3133	9.2675	7.0665	7.9038	7.3675	11.9127	11.8183	13.4786	12.1745	4.611	10.1868	5.3215	34.2679	11.4414	6.873	9.7621	2.6295	7.6033	7.7796	9.736	2.3041	3.6205	5.8844	13.0594	8.2295	13.9927	11.2922	12.523	1.0458
SH2D3A	0.1987	0.1944	0.1394	0.0146	0.077	0.0815	0.0496	0.0273	0.1728	0.1406	0.1399	0.1667	0.2018	0.106	0.099	0.2861	0.1235	0.5344	0.0236	0.2007	0.3889	0.1038	0.4511	0.1161	0.3803	0.2453	0.0456	0.1678	0.2546	0.1166	0.0381	0.341	0.9849	0.0368	0.0599	0.1313	0.1444	0.1034	0.1396	0.1938	0.0752	0.1713	0.5787	0.2669	0.0589	0.2231	0.0183	0.0633	0.098
AC133550.2	0.2418	0.7134	0.3098	0.3591	0.354	0.3082	0.3205	0.3109	0.7458	0.8865	0.1225	0.2786	0.1735	1.9863	0.2806	0.3006	0.5605	0.6173	0.683	1.4137	1.1329	0.9412	0.4525	0.6719	0.6197	0.767	0.5632	0.4522	0.3009	0.5703	0.3298	0.7859	0.2079	0.3866	0.9182	0.5707	0.2117	0.1552	0.5146	0.8332	0.431	0.6478	0.5339	0.8179	0.3868	0.6669	0.2351	0.607	0.0368
AC079360.1	0	0.1219	0	0.0643	0.0634	0	0	0.03	0.1626	0.0412	0	0.0748	0.0242	0	0.1241	0	0	0.0737	0.0389	0.225	0	0.1341	0.027	0.0312	0	0	0.0353	0.0283	0.0419	0.0265	0.0295	0.0394	0.0579	0.0538	0.0986	0.0596	0	0.0278	0	0	0.09	0	0.1859	0	0	0.0507	0	0.0362	0
ZBTB32	0.1727	0.1465	0.0774	0.0604	0.0298	0.1412	0.0079	0.0986	0.0191	0.2128	0.0902	0.1368	0.0568	0.1418	0.1653	0.1889	0.0232	0.052	0.0427	0.1586	0.0318	0.0924	0.0339	0.0049	0.0588	0.0335	0.0387	0.0666	0.0263	0.029	0.0324	0.179	0.1996	0.0422	0.067	0.1168	0.0901	0.0348	0.091	0.0818	0.0212	0.0495	0.0466	0.0803	0.0203	0.0437	0.0504	0.0852	0
TNRC6B	2.5136	6.6876	7.6402	2.1873	10.4004	8.521	2.0378	8.4004	3.6463	6.6398	3.4902	5.6668	3.1613	3.3802	3.772	5.5416	5.892	3.876	7.2168	5.5151	8.1169	11.7446	9.4478	7.9775	11.6512	4.422	8.3898	6.6518	7.1719	7.9703	11.6454	8.6254	5.4976	2.0177	10.638	6.7548	9.2046	2.1755	6.105	10.2612	2.6626	1.6848	3.8165	5.784	6.1763	8.7852	10.3291	8.4239	0.652
ST6GAL1	4.0452	17.3848	16.5976	3.8347	8.7401	33.4477	3.5507	10.1527	32.8339	20.2038	9.0908	19.9609	23.4485	18.0049	9.2242	24.508	19.6419	8.0002	25.5603	26.011	18.0003	21.1935	32.0459	22.928	29.0965	10.3818	38.7697	17.8535	21.3021	33.3854	46.0043	25.0796	3.3657	19.3369	33.3439	17.0855	44.1985	8.0011	18.2946	29.8288	6.2863	5.6267	10.7348	8.448	18.7725	17.3294	33.3944	25.8186	3.5882
ELOCP9	0	0	0	0	0	0	0	0	0	0	0	0	0	0	0	0	0	0	0	0	0	0	0	0	0	0	0	0	0	0	0	0	0	0	0	0	0	0	0	0	0	0	0	0	0	0	0	0	0
AC079382.1	0	0	0	0	0	0	0	0	0	0	0	0	0	0	0	0	0	0	0	0	0	0	0.021	0.0243	0	0	0	0.0442	0	0	0	0	0	0	0	0	0	0	0	0	0	0	0	0	0	0	0	0	0
AC007216.4	0.1064	0.6592	0.3272	0.2731	0.3427	0.0994	0.1163	0.301	0.408	0.4449	0.1778	0.2312	0.2426	0.4952	0.1438	0.6984	0.257	0.1707	0.3306	0.8906	0.9791	0.4762	0.3545	0.5541	0.5378	0.763	0.1908	0.3502	0.2589	0.1431	0.2053	0.7303	0.313	0.0832	0.7618	0.4604	0.2049	0.2146	0.3238	0.2688	0.1738	0.3135	0.3445	0.2262	0.1747	0.5477	0.5793	0.4757	0
RN7SL149P	0	0	0	0	0.0979	0	0	0	0	0	0	0	0	0	0	0	0	0	0	0	0	0	0	0	0	0	0	0	0	0	0	0	0	0	0	0	0	0	0.0498	0	0	0	0.1723	0	0.0499	0	0	0	0
C1orf50	5.453	4.777	5.1679	5.4551	6.3457	4.9914	9.9178	5.402	4.8099	3.1311	3.8697	6.516	7.8409	7.1941	6.4573	7.179	7.1132	7.9009	4.9345	8.026	5.7508	3.9527	4.8219	4.6821	3.0983	6.4255	5.2976	6.1703	4.5797	5.5025	5.2729	4.468	6.3279	10.8582	4.0203	7.3009	4.4311	8.6328	8.4785	6.0408	14.221	9.6633	7.3971	5.2767	9.004	4.3713	4.2257	5.3337	11.8558
AL354984.2	0.0117	0	0	0.0409	0.0269	0	0.0638	0	0	0	0	0	0	0	0	0	0	0.0312	0	0	0	0	0	0	0	0	0	0.012	0	0	0	0	0.0123	0	0	0	0	0	0	0	0	0.0382	0.0158	0	0.0274	0.0107	0	0	0.0391
JPX	7.0331	10.7354	8.8117	7.375	3.9123	7.9491	5.1145	6.0894	11.4114	9.8204	9.091	9.0504	9.7684	12.3591	6.6417	10.5214	5.5936	8.7707	6.8329	13.0509	11.957	4.997	6.9445	4.9725	5.6224	7.8724	10.1694	8.7379	6.3151	11.5091	7.319	10.2324	5.8616	12.2872	6.2893	4.8829	4.7732	9.5879	9.2201	12.4279	10.421	8.889	9.4948	8.4173	5.2954	10.3106	5.1558	5.6477	22.4545
MIR4749	0	0	0	0	0	0	0	0	0	0	0	0	0	0	0	0	0	0	0	0	0	0	0	0	0	0	0	0	0	0	0	0	0	0	0	0	0	0	0	0	0	0	0	0	0	0	0	0	0
PCGF7P	0.0228	0.2014	0.1749	0.0664	0.1178	0.1064	0	0.1485	0.1678	0.017	0.0317	0.0618	0.0399	0.2492	0.094	0.2801	0.0458	0.0456	0.1446	0.1045	0.2094	0.1439	0.1896	0.0902	0.1217	0.0992	0.2915	0.1404	0.0346	0.1859	0.0976	0.1952	0.0837	0	0.1494	0.0615	0.1643	0.0803	0.1199	0.2396	0.093	0.0559	0.1689	0.1361	0.0934	0.2406	0.2655	0.1047	0.1903
AP001284.1	0.0565	0.0167	0.0434	0.0659	0.0455	0.0176	0	0.0246	0	0.0169	0.0236	0.0051	0.0099	0.0155	0.0127	0.0077	0.0076	0	0.0239	0	0	0.0055	0.3818	0.0064	0.0055	0.0383	0	0.3136	0.0429	0.0163	0.0121	0.0323	0	0.011	0.027	0.0305	0.0091	0.0342	0	0	0	0.0185	0.0229	0.0225	0.106	0.0104	0.0055	0.0148	0
AL138749.1	0.0151	0.0892	0.0194	0	0.0348	0	0	0	0.0223	0.0452	0.0632	0	0	0	0.0341	0	0	0	0.0427	0.0617	0.1113	0	0.0445	0	0.0294	0	0	0.1555	0	0	0	0.0216	0	0	0	0.0164	0	0	0	0	0	0	0.0408	0.0402	0	0	0.0441	0	0
AC139099.3	0	0	0	0	0.0158	0	0	0	0	0	0	0	0	0	0	0	0	0	0	0	0	0.0134	0	0	0	0	0	0	0	0.0132	0	0	0	0	0	0	0	0.0139	0	0	0	0	0	0	0	0	0	0.0181	0
MGA	4.2466	4.4116	6.9973	2.4615	5.5203	9.1854	2.9273	5.3815	4.3051	3.1673	3.3597	3.718	4.5471	4.8407	4.0889	4.6032	3.9996	3.5959	5.2417	5.0645	3.5438	7.3167	8.7552	5.2968	8.8179	4.0934	7.1483	6.2408	5.879	7.8245	7.1582	6.1238	4.2046	4.8487	8.4191	5.8471	6.5403	2.3227	3.7058	8.0122	2.5384	2.3681	4.6448	3.9324	4.1942	6.4599	9.1526	5.6392	1.4082
EMBP1	0.3201	1.7059	0.3784	0.2383	0.1587	0.8341	1.192	0.5465	0.6188	0.507	0.2114	0.4297	0.4404	0.5214	0.3046	1.0002	0.6519	0.1255	0.7757	1.1184	0.5892	1.2623	0.8331	1.1654	0.7835	0.4253	0.8661	0.545	0.4744	0.5357	1.2098	0.4578	0.1566	0.2886	1.7094	0.3045	1.7585	0.423	0.2843	0.7061	0.1849	0.2756	0.5623	1.2689	0.4598	1.2051	1.0117	0.4391	0.2954
PAEPP1	0	0.0335	0.1748	0	0	0.0354	0	0	0	0.1358	0	0.2264	0.0199	0.3112	0	0.0311	0.1526	0.0608	0.1284	0.0696	0.0418	0.1106	0	0.0515	0.1326	0.2203	0.2039	0	0.0346	0.4151	0	0	0	1.2219	0.0271	0	0.073	0.0229	0	0	0.0371	0	0	0.3021	0	0.0418	0.4642	0.2392	0
DIDO1	4.975	4.8656	7.035	3.3849	6.4034	10.1444	3.8117	6.7124	6.7443	6.8186	5.8637	5.9219	5.1503	7.1608	6.2793	5.1819	4.7078	5.2077	11.1706	8.3614	7.9183	13.5305	8.5128	7.2324	9.7191	4.8346	9.3747	8.2295	7.6806	8.056	8.3043	9.4276	5.4311	7.1919	6.9889	8.2697	6.9856	3.2187	6.6769	11.4534	3.1515	4.4401	5.3895	6.96	5.1792	12.8816	8.3671	8.8836	2.3986
AL590556.1	0.7179	0.3652	0.3489	0.9533	0.2848	0.3086	4.5118	0.4579	0.4748	0.4438	0.6208	0.5379	0.5645	0.5762	1.1896	0.9481	0.6645	0.5297	0.6294	0.5307	0.2734	0.265	0.3155	0.3644	0.1444	0.3839	0.3806	0.7894	0.4143	0.3331	0.2123	0.2832	1.561	0.6048	0.1182	0.2411	0.7152	0.749	0.6666	0.6256	0.6877	2.1078	1.6035	0.3948	0.3195	0.6373	0.4815	0.4232	8.1148
PHBP20	0.0585	0.0431	0.0562	0	0.0336	0.0683	0	0.0477	0.0647	0.0218	0.0204	0.0794	0.0256	0.0801	0.0439	0	0.0196	0.0195	0.0619	0.1194	0.1614	0.1423	0.0143	0.1324	0.0284	0.0708	0.1124	0.0301	0.0222	0.0983	0.0783	0.0209	0.0768	0.0286	0.0523	0.1423	0.0469	0	0	0.077	0.0239	0.1436	0.0592	0.1748	0.0172	0.0538	0.0995	0.0192	0.0244
RNU6-75P	0	0	0	0	0	0	0	0	0	0	0	0	0	0	0	0	0	0	0	0	0	0	0	0	0	0	0	0.2365	0	0	0	0	0	0	0	0	0	0	0	0	0	0	0	0	0	0	0	0	0
AC104803.1	0.0226	0	0	0	0	0	0	0	0	0	0	0	0	0	0.0339	0	0	0	0	0	0	0	0	0	0	0	0	0	0	0	0	0	0.0238	0	0	0	0	0	0	0	0	0	0.0305	0	0.0265	0	0	0	0
ACTG2	1.8856	1.8562	0.1729	3.4818	2.8806	0.0684	0.0457	0.8193	0.4675	0.1359	1.1452	0.2784	2.8974	0.0773	0.0895	3.3516	0.3032	0.4364	0.0753	0.5509	1.8077	0.4122	0.409	0.2274	0.4149	0.593	0.0322	13.9264	0.6205	0.2533	5.1961	2.4185	0.4451	2.6799	0.5392	0.4786	0.9015	6.3598	0.3783	1.1232	2.661	0.7295	0.1355	1.6012	0.4454	0.2308	0.4943	0.7014	0.0315
RPSAP18	0.4453	0.3584	0.3286	0.6614	0.4503	0.4836	1.2544	0.2203	0.4579	0.8467	0.376	0.6354	0.4734	1.2565	0.2635	0.7199	0.7789	1.3537	1.0103	0.9093	0.6707	1.6812	0.1058	2.3531	1.8239	0.8895	0.4149	0.9024	0.2258	0.7263	0.2315	0.4825	3.1628	4.3523	0.2738	0.9345	0.2599	0.2858	0.6636	1.0942	0.5514	1.4584	0.8924	0.5201	0.3642	0.7817	0.5643	0.5857	2.4602
PLEKHS1	0.0089	0.0098	0.0028	0.031	0.0178	0	0.0282	0.0024	0.0163	0.0033	0.0216	0.008	0.0019	0.003	0.0083	0.0121	0.0089	0.1155	0.0125	0	0.0448	0.0065	0	0.02	0.0108	0	0.0028	0.0364	0.0135	0.0021	0.0024	0.0032	0.0489	0.013	0	0.0048	0	0.0335	0.0026	0.0047	0	0	0.1374	0.0088	0.0104	0.0041	0.0043	0.0058	0.0037
RF00408	0.1785	0.2633	0	0.1041	0	0.139	0	0.1942	0	0	0	0.0808	0	0	0.067	0.8544	0	0.358	0	0.1822	0.3285	0.0868	0	0.2021	0.2603	0.0865	0.3429	0.0918	0	0.1715	0	0.3828	0	0.0872	0.213	0.0965	0.1432	0.09	0.1045	0.4698	0	0	0.7225	0.2372	0	0.1641	0	0.2347	0
FOSL1	0.5449	2.1035	0.4628	0.3697	0.9477	0.2369	0.231	0.2827	0.3272	0.3408	0.8916	1.004	1.3281	0.6073	0.4901	0.4334	1.6074	1	0.4207	0.4464	0.6065	0.7215	0.6646	1.1766	0.191	0.78	0.4302	0.4498	0.7422	0.408	1.1139	0.435	1.9845	0.7493	0.4084	0.2262	0.9154	0.7029	1.224	0.2002	0.6317	0.2386	1.0603	0.2189	0.3494	0.268	0.5422	0.6167	0.1166
LINGO3	1.3339	0.0787	0.1504	0.1806	0.135	0.0748	0	0.0174	0.0708	0.3108	0.1561	0.6956	2.8777	0.3945	2.0953	2.0434	0.2721	0.1499	0.3542	0.049	0.1375	0.2285	0.0941	0.1208	0.1868	0.212	0.1367	0.0439	0.3734	0.1333	0.0629	0.0687	0.129	0.0365	0.6814	0.6812	0.0171	0.113	0.1187	0.2584	0.0959	0.1573	0.5904	0.8084	0.0188	0.5298	0.5811	0.0912	0.0268
AC119677.1	0	0	0	0	0.0584	0	0	0	0	0	0	0.023	0.0445	0.0348	0	0	0	0.1358	0	0	0	0	0	0	0	0	0	0	0	0	0	0	0.0267	0	0	0	0	0	0	0	0	0	0	0	0	0	0	0	0
MEP1A	0.012	0.0178	0.036	0	0.0231	0	0	0.0087	0	0	0.0391	0.0109	0.0106	0.0165	0.0301	0	0.0054	0.0107	0	0.0041	0	0.0351	0	0.0591	0.0039	0.0039	0.036	0.0825	0	0	0.0301	0	0	0.0314	0.0048	0.013	0	0.004	0	0	0.1246	0	0.0162	0	0.0141	0.0295	0.0078	0.0053	0
PSMD10P3	0	0.0394	0	0.0934	0.1535	0.1247	0.0973	0.0581	0	0	0.0372	0.1208	0.0468	0	0.0802	0	0	0.0714	0.1885	0.0545	0.2456	0.1299	0.0262	0.0302	0.026	0.0776	0	0.0824	0	0.0769	0.0286	0	0.0841	0.1565	0	0.0289	0.0428	0	0.0312	0.1405	0	0	0.2521	0	0	0.0982	0	0.1053	0.0446
AC027279.4	0.0635	0.2299	0.1627	0.0404	0.093	0.0719	0.0105	0.0502	0.0511	0.0431	0.008	0.0679	0.0202	0.0316	0.0563	0.0474	0.0465	0.0077	0.0734	0.0648	0.1275	0.1966	0.1131	0.0653	0.0505	0.0112	0.0739	0.0534	0.0088	0.0998	0.0247	0.099	0.0061	0.0282	0.0689	0.0437	0.0371	0.0116	0.0473	0.0182	0.0283	0	0.0545	0.0077	0.0135	0.0106	0.0786	0.1366	0
FBXO36	1.867	1.4578	0.8855	0.9302	2.5316	2.0164	2.0273	1.5039	2.8124	0.7154	1.651	1.1965	1.8739	1.8467	1.3222	0.9618	0.9275	1.0904	1.4428	2.4414	2.7728	0.7876	1.7083	1.2217	0.9224	2.3533	1.7279	1.4997	2.3376	1.8205	1.0949	2.7742	1.0448	1.7062	1.4253	1.8134	1.8487	1.617	1.2277	0.9223	2.749	1.9752	2.4091	1.5105	1.3798	1.2094	1.6712	1.9731	1.7589
MIR6762	0.139	0	0.1782	0	0	0	0	0	0	0	0	0	0.2439	0	0.2088	0	0	0	0.1964	0.1419	0	0	0	0	0	0.1348	0	0	0	0.2672	0	0	0	0	0	0	0	0	0	0.2928	0	0	0	0.1848	0	0	0.1352	0	0
NCBP1	6.4266	11.7078	14.1508	10.1451	14.8278	18.2062	8.7279	12.2178	10.8129	11.8991	14.4421	15.1595	13.0849	10.6084	12.1998	14.0024	8.5796	10.8753	19.4954	10.3215	9.0808	26.8544	16.2966	16.4542	15.0916	12.3693	16.3728	15.2151	20.1106	15.5877	15.7255	12.5139	4.7701	10.2805	22.2555	19.7334	15.9994	13.3668	13.3418	31.4069	9.2487	6.7118	14.0067	17.9184	13.263	16.0642	28.0815	15.5434	5.5436
SNX18P10	0	0	0	0	0	0	0	0	0	0	0	0	0	0	0	0	0	0	0	0	0	0.0224	0	0	0	0	0.0295	0	0	0	0	0	0	0	0.0275	0	0	0	0	0	0	0	0	0	0	0.0424	0	0	0
AC104462.2	0.2206	1.6274	1.0177	0	0.1015	0.3437	0	0	0.1953	0.1318	0	0.4794	0.2709	1.5707	0.1325	1.6898	1.066	1.1212	2.4929	1.3964	0.2437	0.6871	0.519	0.7493	1.7589	0.8126	0.1696	0.2269	0.1342	0.636	0.1419	0.1262	0	0.345	0.2106	0.1909	0.1416	0.356	0	1.2544	0.2163	0.7224	0.1786	0.4691	0	0.4057	0.2574	0.9864	0
DNM1P41	0	0.0053	0	0	0.0164	0	0	0	0.0105	0.0213	0	0.0032	0	0	0.008	0	0	0.0143	0.005	0.0073	0.0066	0.0104	0.014	0.0081	0	0	0	0.0037	0	0.0069	0.0191	0	0.0038	0	0	0.0077	0	0.0036	0	0.0225	0	0	0	0	0.0209	0.0033	0	0	0.006
AL353600.1	0.1429	0.1406	0.5494	0.1668	0.1644	0.0742	0.3473	0	0.773	0.427	0.7964	0.4744	0.1671	0.7175	0.8942	0.1303	0.5115	1.3379	0.3364	0.3891	9.9088	0.3245	0.467	0.4854	0.139	0.3694	0.4272	0.049	0.2899	0.412	0.2553	1.7713	0.1502	1.3035	0.5686	0.0515	0.3059	0.2402	0.5577	0.1505	0.3114	0.468	0.5786	0.6331	0.2795	0.3066	0.1853	0.6265	0
MIR124-3	0	0	0	0	0	0	0	0	0	0	0	0	0	0	0	0	0	0	0	0	0	0	0	0	0	0	0	0	0	0	0	0	0	0	0	0	0	0	0	0.1447	0	0	0	0	0	0	0	0	0
LINC01072	0	0	0	0	0	0	0	0	0.0409	0	0	0.0251	0.0243	0	0	0	0	0	0	0	0	0	0	0	0	0	0	0.0285	0.0422	0	0	0	0	0.0271	0	0	0	0	0	0	0.0907	0	0	0	0.0326	0	0	0	0
PRNT	0.0154	0	0	0	0.0118	0	0.1401	0	0	0	0	0	0	0	0.0115	0	0.0069	0.0274	0	0	0	0	0.005	0.0174	0.005	0.0248	0	0.0158	0	0.0049	0.0055	0.0073	0.0162	0.015	0.0061	0.0055	0	0	0	0.0054	0	0.0504	0.0415	0	0.006	0.0094	0	0.0135	0.0771
PICK1	2.6643	4.7261	4.3711	0.6129	2.4517	3.6824	0.9971	3.1849	5.0363	4.6912	1.8865	3.356	3.9056	2.723	3.5185	2.5593	3.7927	3.2232	4.83	8.0459	6.2892	4.3928	3.8801	4.0822	2.8778	4.5475	3.939	5.6194	3.8493	3.6489	4.0436	4.7612	3.3234	2.2804	2.7393	5.3953	4.202	1.3545	4.5218	4.5999	1.6496	2.347	3.2707	5.2787	4.9203	4.1348	2.9235	4.3746	0.5261
LINC01683	0	0	0	0	0.0334	0	0	0	0	0	0	0	0	0	0	0	0	0	0	0	0	0	0	0	0	0	0	0	0	0	0	0.0415	0	0.0284	0	0	0	0	0	0	0	0	0.0783	0	0	0	0	0	0
BX470209.1	0.248	0	0.0167	0.1219	0	0	0	0.0568	0	0.0585	0.0909	0	0.0114	0	0.1666	0	0.035	0.0175	0.0184	0.0133	0	0	0	0.1035	0.1142	0.038	0	0.1208	0	0.0125	0	0	0	0.051	0.0156	0.0989	0	0.1053	0	0	0.0427	0.4916	0	0	0.3676	0.012	0	0	0.0218
RPP14	1.8248	2.5048	3.6155	2.9675	3.187	4.2647	2.415	2.938	5.6367	4.4856	3.7855	4.2933	3.2683	5.4292	3.2721	3.4745	2.5087	4.3101	3.2129	3.7726	4.6968	3.4561	3.2122	2.9682	3.1126	3.5764	5.2042	3.3063	3.0214	3.5952	2.7458	4.564	4.2258	3.3323	3.1034	2.8239	2.842	2.5747	3.843	5.411	2.7534	3.4227	2.582	5.0438	3.1044	3.5735	3.5796	4.3659	2.8441
CSAG2	0	0	0.0371	0.0846	0	0	0.4226	0	0	0	0	0	0	0	0	0	0	0	0	0	0	0	0.0142	0	0	0.014	0	0.0149	0	0	0	0	0	0	0	0	0	0	0	0	0	0.0475	0	0	0	0	0	0	0
TCTE1	0.1442	0.4314	0.2498	0.1274	0.1839	0.492	0	0.0848	0.0863	0.7571	0.1032	0.1341	0.1094	0.2402	0.4245	0.3999	0.1674	0.0365	0.1872	0.0955	0.1579	0.11	0.1146	0.0883	0.2767	0.223	0.1948	0.1243	0.1661	0.3072	0.2424	0.1171	0.3155	0.0343	0.2187	0.7592	0.0626	0.0668	0.0411	0.5911	0.2867	0.0638	0.0526	0.2901	0.0457	0.1183	0.2161	0.1231	0
AC007391.1	0.0712	0	0.0304	0.0554	0.0273	0	0.1297	0.0516	0	0.0354	0.1653	0.0215	0.104	0	0.0534	0	0	0.0317	0	0.1695	0.0437	0	0.0465	0.0537	0	0.2989	0.0304	0.0488	0	0.0228	0	0.0339	0.1247	0.1159	0.0283	0.0257	0	0	0.0278	0.025	0.0388	0	0.1601	0.0631	0.0278	0.0654	0.0231	0.0624	0.0794
LRFN4	6.1475	11.2098	7.1679	10.2425	14.0874	10.0393	1.7415	8.6491	8.1022	3.8654	5.6253	7.2886	7.6532	9.1004	6.7303	4.3779	7.3773	7.5434	10.0095	14.3265	7.5882	10.7317	6.9089	10.7951	7.8189	5.6147	11.3965	10.0729	7.6797	10.1297	5.0806	8.9311	3.3237	12.8671	7.953	7.8634	10.4038	5.8416	7.4939	6.1214	3.4064	3.4614	7.2291	12.9125	7.9125	10.2665	10.579	10.4591	1.6476
IMMP1LP1	0.049	0.3977	0.5024	0	0.3101	0.2672	0.0447	0.0267	0.0361	0.0732	0.2048	0.1109	0.1289	0.2013	0.1104	0.067	0.3617	0.3605	0.0692	0.5003	0.0451	0.1908	0.2162	0.0277	0.1668	0.095	0.1256	0.252	0.0745	0.3532	0.1051	0.0701	0.0258	0.3831	0.2632	0.3181	0.236	0.0988	0.1721	0.0258	0.1201	0.2006	0.2315	0.0977	0.115	0.0676	0.0715	0.1611	0.2868
PRTG	1.4792	5.2296	4.9007	0.4732	5.2879	7.8311	12.2111	2.6769	6.1299	1.7523	3.7248	6.1137	4.2366	5.9075	2.8655	4.0196	4.861	2.6931	5.4254	10.6215	7.5008	7.7407	10.1106	5.8387	6.9055	2.0051	9.675	1.221	4.5754	6.4586	6.1894	7.9068	2.9824	7.882	7.742	3.4974	5.1848	2.1234	5.2557	6.677	6.5035	2.5511	3.2225	5.2474	1.6884	8.1353	8.7066	8.2888	1.1669
ZNF677	3.1887	7.8072	5.6744	6.039	3.2964	7.4752	0.7949	4.5372	7.1118	4.7157	4.6082	5.4708	6.2863	9.1	4.197	10.9837	5.9263	4.0766	8.1701	6.2877	5.5613	7.0858	7.9856	3.021	6.8115	5.888	6.6873	5.5749	5.3334	4.4695	4.02	5.7971	3.2222	6.0402	6.5539	5.2393	6.0012	4.3084	5.6542	9.3684	4.6049	3.0996	5.1473	7.6478	5.5363	4.8687	7.8499	6.3636	6.546
CDC20P1	1.1	3.1989	3.1971	0.2418	0.7887	0.4719	0.6828	2.5847	0.8937	1.3694	1.2549	1.9342	1.3003	0.9495	1.0235	2.2352	1.2625	0.6183	0.9346	1.4079	1.0565	6.4779	1.469	4.1878	2.1856	1.5917	3.9214	1.3448	3.8561	3.6388	1.9653	1.3452	1.1645	0.6622	5.4325	1.9146	0.8445	1.8972	0.9798	5.6319	0.8337	0.496	1.8717	1.8751	0.8418	1.3485	3.775	3.9522	0.1067
AC244517.1	8.8902	3.1967	2.1301	3.7657	0.8573	6.1354	4.0638	2.9189	18.6537	17.1765	2.0363	8.3762	3.9813	10.2969	0.1894	5.1197	3.6928	0.023	4.0159	3.8389	5.5921	2.0641	2.5284	6.9378	4.453	11.4956	1.9607	3.072	2.3979	3.4374	4.5222	0.6722	1.8795	8.1282	8.7843	7.3054	0.9109	4.0927	6.1668	1.4183	2.2856	7.3393	11.773	12.295	0.5111	0.5744	4.6376	14.089	4.8699
JAK3	1.9656	0.3314	2.6874	0.256	1.371	1.802	0.3646	1.7378	0.2822	1.497	1.1736	1.4682	1.4268	3.6045	2.0531	1.8244	7.1044	0.7981	0.357	1.1575	0.2584	1.568	2.725	0.4431	0.488	2.0125	0.5778	0.7438	1.4444	1.9953	0.6189	0.2485	1.3741	1.2915	0.664	3.1159	0.6564	1.9841	1.8758	0.0684	0.608	0.6753	1.2529	1.3854	0.4757	2.5802	0.7304	1.9595	0.0939
TRBV6-8	0	0	0	0	0	0	0.2556	0	0	0	0	0	0	0	0.0527	0	0	0	0	0	0	0	0	0	0	0.034	0	0	0.0533	0	0	0	0	0	0	0	0.3377	0	0	0	0	0	0	0	0	0.0645	0	0	0
STATH	0	0	0	0	0.0632	0	0	0	0	0.0246	0	0.005	0	0	0	0	0	0.022	0.0078	0	0	0	0	0.0124	0.0053	0.0107	0	0.0339	0	0	0	0	0	0	0	0	0	0	0	0	0.0449	0	0.0148	0.0365	0	0	0	0	0
AL163195.1	0	0	0	0	0.0395	0	0	0	0	0	0	0	0	0	0	0	0	0	0	0	0	0	0	0	0	0	0	0	0	0	0	0.0491	0	0	0	0	0	0	0	0	0	0	0	0	0	0	0	0	0
ME3	2.9284	1.9121	2.052	2.2067	3.2868	3.6938	12.4632	1.1661	1.7097	1.6335	0.8941	1.2157	2.0737	1.5356	1.3497	1.5468	1.6684	1.8167	1.1706	4.825	5.9297	1.2947	0.9162	0.5397	0.6725	2.28	0.2674	1.8171	2.417	1.3832	0.8382	5.6273	10.4053	0.7399	0.6619	2.5819	0.7901	0.7949	2.3014	0.4789	3.3602	2.6066	3.3087	0.3768	2.1091	2.7011	1.1694	1.1062	0.7347
SNORD114-22	0	0	0	0	0.1911	0	0.6053	0	0	0	0	0	0	0	0	0	0	0.4442	0	0	0	0	0	0	0	0	0	0	0	0	0	0	0	0	0	0	0	0	0	0	0	0	0	0	0	0	0	0	0
RN7SKP195	0	0	0	0	0	0	0	0	0	0	0	0	0	0	0	0	0	0	0	0	0	0	0	0	0	0	0	0.0406	0	0	0	0.0564	0	0	0	0	0	0	0	0	0	0	0	0	0	0	0	0	0
AC008620.2	0.0991	0.0112	0.0684	0.0178	0.0175	0	0.0139	0	0.0112	0	0.0106	0	0	0	0.0172	0	0	0.0306	0	0	0.3086	0	0.0075	0	0.0074	0.1404	0.0098	0.0078	0	0.0073	0.0163	0	0.008	0.0074	0.0637	0.0082	0	0	0.0089	0	0.0498	0.1123	0.1337	0	0	0	0	0.01	0
AC007741.1	0	0	0.0044	0.004	0	0	0.0249	0	0.0252	0	0	0.0031	0	0.0047	0	0.0094	0	0	0	0	0.0063	0	0	0	0.0067	0	0	0	0.0104	0	0	0.0049	0	0	0.0082	0.0074	0	0	0.016	0	0	0	0.0092	0	0.004	0	0.0067	0.0045	0
AC009656.1	0	0.0738	0.0321	0	0	0	0	0	0	0	0	0	0	0	0	0	0	0.1004	0.0353	0.0511	0	0.0243	0	0	0	0	0	0	0.0381	0	0	0	0	0	0	0	0	0	0	0.0527	0	0	0.0338	0	0	0	0.073	0	0
UBR5-AS1	4.5695	2.8091	4.5542	5.0064	4.4453	3.2354	24.707	2.6573	6.1193	7.9258	6.2671	5.3646	4.5373	4.9219	7.0184	5.3335	3.3255	5.9621	4.2887	4.9399	6.9067	2.9846	2.4238	3.9091	3.0804	6.9048	3.5254	3.2434	3.2594	3.6693	2.9988	3.9138	9.6474	9.1548	4.4783	6.6467	2.7301	5.7604	4.3747	3.1328	12.0392	9.552	4.4056	5.0674	5.9274	2.9876	3.3179	4.4671	9.7057
RF00019	0	0	0	0	0.1228	0	0	0	0	0	0	0	0	0	0	0	0	0	0.1508	0	0	0	0	0	0	0	0	0	0.1624	0	0	0	0	0	0	0	0	0	0	0	0	0.3496	0	0	0	0	0	0	0
AC009269.3	0	0	0	0	0	0	0	0	0	0.1218	0	0	0	0	0	0	0	0.0727	0.0768	0	0	0	0.0266	0.0923	0	0	0	0.028	0.0413	0	0	0	0	0.0797	0	0	0	0	0	0	0	0	0	0	0	0.025	0	0	0
ARHGAP35	11.2964	13.0744	13.53	6.7201	12.5259	18.7453	1.3197	15.2874	10.7638	12.2974	8.3283	9.8784	7.0955	10.8406	13.1152	13.2453	8.5273	7.3125	9.0568	10.6363	11.2427	15.0293	21.1244	11.7082	17.9239	9.5369	15.7226	18.6077	13.2461	12.7397	15.9069	15.28	2.9971	5.6967	19.0721	13.5128	16.3882	4.7354	10.0418	18.6258	2.2885	3.0921	6.3194	11.0351	14.1539	14.5667	14.8825	14.9236	1.2093
AL357558.1	0	0	0	0	0.0302	0	0	0	0.0387	0.1175	0	0	0	0.0718	0	0	0	0	0.037	0	0	0	0	0	0	0	0	0	0.0399	0	0	0	0	0	0	0	0	0.0264	0	0	0	0	0.0354	0	0	0	0	0	0
AC020899.1	0.3178	0.0586	0.3309	0.6721	0.2057	0.2785	1.1946	0.1513	0.1758	0.267	0.3874	0.3237	0.331	0.2991	0.5667	0.2173	0.1333	0.2656	0.0842	0.2028	0.2925	0.0773	0.2142	0.1799	0.0772	0.1348	0.0763	0.286	0.1813	0.2291	0.0426	0.1136	0.2087	0.2523	0.1185	0.2364	0.0956	0.3205	0.2325	0.2091	0.4544	1.0407	0.3216	0.264	0.3263	0.2191	0.0966	0.1306	2.4249
TRAJ18	0.5435	0	0	0	0	0	0	0	0	0	0	0	0	0	0	0.2478	0	0	0.2559	0	0.3335	0	0	0	0	0	0	0	0	0	0	0.5182	0	0	0	0	0	0	0	0	0	0	0	0	0	0	0	0	0
PSMC1P10	0	0	0	0	0	0	0	0	0	0.0135	0	0	0.0079	0	0.0068	0	0.0121	0.0121	0	0	0	0.0175	0	0	0	0	0	0.0278	0	0	0	0	0	0	0.0108	0.0195	0	0	0	0.0095	0.0147	0	0.0365	0	0	0.0083	0	0	0
OSBPL5	2.5976	1.9966	3.1337	1.4166	2.3585	2.081	0.7443	3.6055	1.8877	1.3254	1.2361	1.7734	2.8048	1.6008	0.8345	2.0832	2.9019	2.9537	0.6538	3.154	2.4439	2.0964	2.8226	1.8278	1.6397	2.5738	1.9163	3.0395	3.0064	2.4549	2.3416	2.7393	1.1614	1.357	2.0625	6.9724	1.419	1.6749	2.3136	3.1888	0.7485	0.8653	1.9624	2.254	2.6533	2.4561	1.9935	3.4226	0.1312
HSPE1P27	0.202	1.5496	0.6212	0.0471	0.7901	0.5035	0.0736	0.4835	0.3575	0.7845	0.2814	1.975	0.5314	0.1659	0.455	0.1105	0.2169	0.7564	0.6276	1.3197	1.4871	0.7863	0.3564	0.9147	1.4532	0.3916	0.3623	0.5402	0.1844	0.4658	0.3464	0.8088	0.7642	0.3948	0.5786	0.4807	0.1297	0.163	0.7093	0.8081	1.4523	1.1905	0.9812	0.2147	0.1896	0.4457	0.4321	0.4781	0
AC018693.2	0	0	0	0	0	0	0	0	0	0	0.2514	0	0	0	0	0.0309	0	0.0603	0	0	0	0	0.0221	0.0766	0	0	0	0.0232	0	0	0	0	0	0.022	0	0	0	0	0	0	0	0	1.4005	0	0.0265	0	0	0	0
PRYP4	0	0	0	0	0	0	0	0	0	0	0	0	0	0	0	0	0	0	0	0	0	0	0	0	0	0	0	0	0	0	0	0	0	0	0	0	0	0	0	0	0	0	0	0	0	0	0	0	0
AC087393.3	0	0	0	0	0	0	0	0	0	0	0	0	0	0	0	0	0	0	0	0	0	0	0	0	0	0	0	0	0	0	0	0	0	0	0	0	0	0	0	0	0	0	0	0	0	0	0	0	0
Z98259.1	0	0.0104	0	0.0164	0	0	0	0	0	0	0	0	0	0	0	0	0	0	0	0	0	0	0	0	0	0	0	0	0	0	0	0	0	0	0	0	0	0	0	0	0	0	0	0	0	0	0	0	0
LILRA4	0	0.0244	0.1129	0.0835	0.2218	0.0858	0.0201	0.006	0	0.436	0.046	0.005	0.0193	0.1433	0.0331	0.0151	0.0444	0.0147	0.0934	0	0.0406	0.7772	0.2591	0.0499	0	0.0587	0.0353	0.119	0.0922	0.0212	0.1948	0.1182	0.0232	0.0161	0.0263	0.0238	0.0354	0.0333	0.3933	0	0.396	0.0271	0.0149	0.0146	0.0517	0.0101	0.0214	0.0579	0.1013
AL513318.1	0	0	0.0309	0	0.0278	0	0	0.0263	0.0356	0.018	0	0.0218	0.0106	0.0165	0.0091	0.0165	0	0	0.017	0	0.0222	0	0	0.0137	0	0	0.0155	0.0248	0	0	0	0	0.038	0.0472	0	0	0	0.0122	0	0	0	0	0.0326	0.016	0	0	0	0	0
PRKDC	16.296	27.3309	31.4436	17.3238	23.182	34.9277	16.3982	23.7584	17.2122	18.552	27.0945	22.0236	16.0417	14.7415	26.6118	33.8362	18.6675	8.7172	20.1377	17.0458	10.4145	17.6551	45.2347	25.7337	40.1698	27.7554	22.6408	37.7337	27.3365	34.7262	36.1987	17.7836	5.7382	6.648	54.336	32.5352	43.8685	32.5373	17.3681	35.4409	21.0038	9.707	20.7952	18.5839	32.1842	33.3898	42.6958	24.3548	9.5777
ACTBP11	0.0743	0.0313	0.0408	0.062	0.0855	0.0827	0.0194	0.0809	0.1253	0.0476	0.0592	0.0577	0.0466	0.0436	0.008	0.0436	0.0855	0.0142	0.045	0.0542	0.0586	0.062	0.0833	0.0842	0.1342	0.1338	0.1496	0.284	0.0323	0.0306	0.0683	0.1063	0.0223	0.0623	0.1014	0.0689	0.0341	0.0428	0.0995	0.0335	0.0174	0	0.1433	0.1552	0.0872	0.1269	0.1342	0.1117	0
RN7SKP231	0	0	0	0	0	0	0	0	0	0	0	0	0	0	0	0	0	0	0	0	0	0	0	0	0	0	0	0	0	0	0	0	0	0	0	0	0	0	0	0	0	0	0	0	0	0	0	0	0
CDK12	3.8296	8.3517	7.9158	2.5758	5.0792	10.1569	2.4636	6.685	5.1648	5.0048	4.7145	4.6378	4.9077	5.3922	3.2501	6.758	5.6615	3.6082	7.5515	6.451	5.0195	7.0179	10.2608	5.361	8.6649	3.8255	7.4342	7.1865	7.1459	8.1353	7.4415	6.9925	2.8186	2.6174	7.6456	7.68	6.7556	3.1673	4.9984	10.7872	2.7919	2.5689	4.5856	3.053	5.3391	6.8923	6.9147	7.6574	1.8474
RNA5SP326	0	0	0	0	0	0	0	0	0	0	0	0	0	0	0	0	0	0	0	0	0	0	0	0	0	0	0	0	0	0	0	0	0	0	0	0	0	0	0	0	0	0	0	0	0	0	0	0	0
AC006927.1	0	0.0354	0	0.056	0	0	0	0	0.0354	0	0	0.0217	0	0	0.0541	0.0328	0.0322	0	0	0.049	0.0442	0.0234	0	0.1087	0.1401	0	0.0308	0.0741	0.073	0.0231	0.0515	0	0.0505	0.0235	0.0573	0.0779	0	0.0969	0	0.0253	0	0.0786	0.1944	0.0319	0.0845	0.0221	0.1401	0.0947	0.0402
RPAIN	3.093	5.6913	4.6625	3.4722	4.7676	4.8842	3.0503	4.3322	6.0561	6.0941	4.4705	4.3988	5.2684	6.3415	4.2243	3.1301	5.0219	4.2895	8.5357	9.3977	5.5691	4.2617	4.9076	4.4496	4.4437	5.001	4.8614	5.7592	5.19	4.5144	4.6869	3.8573	2.564	5.5643	4.2928	7.3945	4.5488	3.538	5.7235	7.1151	8.9757	8.229	5.6399	3.1781	6.6577	4.7007	4.2957	5.1809	4.5458
CEP170	7.9519	15.4367	11.0806	8.0063	14.5715	15.8687	12.194	11.9662	6.0307	6.4725	4.8121	6.4456	8.0829	11.4342	5.9445	14.9868	13.0908	6.2291	21.3377	9.1919	7.9315	9.4892	16.5584	16.0728	46.7609	14.0291	13.3996	18.8527	14.8688	17.6287	12.1175	7.8068	3.4198	14.3111	20.9402	14.8274	10.8761	5.2482	10.841	18.8223	9.2153	11.3451	7.0921	5.799	16.9712	8.9363	13.6003	14.5518	4.9943
AC023078.2	0	0	0	0	0.0139	0	0	0	0	0	0	0	0	0	0	0	0	0	0	0	0	0	0	0	0	0	0	0	0	0	0	0	0	0	0	0	0	0	0	0	0	0	0	0	0	0	0	0	0
RPL12P45	0	0	0	0.0876	0.0576	0	0	0	0	0	0.1394	0	0	0	0	0	0	0	0.0353	0	0	0	0.0245	0.1133	0	0	0	0.0772	0	0.024	0	0	0	0	0	0	0	0	0	0	0	0	0.6751	0	0.0293	0	0	0	0
YES1	13.6565	28.3401	18.978	20.5651	20.3274	19.937	22.4245	33.2124	24.5044	10.7449	12.1375	15.1709	18.326	16.5898	13.5144	27.3766	14.1164	17.0295	20.6151	11.8313	16.7015	16.8075	24.5446	28.0798	38.5858	15.8238	27.957	20.3283	16.3241	19.5706	17.4863	19.6955	10.2698	15.2093	21.6836	17.9512	21.8191	18.1561	20.6811	24.9603	14.5438	13.8964	20.7138	18.4642	25.3268	18.9411	29.4858	23.9788	7.9009
AL022393.1	0.5276	0.9152	0.8223	0.5075	0.3609	0.5777	0.3768	0.1241	2.577	0.884	0.4867	0.7876	0.3502	1.1812	0.4015	0.117	0.1723	0.4768	0.2719	1.4049	1.1287	0.3678	0.5102	0.4279	0.5823	0.8777	0.1918	1.4449	0.2712	0.5756	0.0764	1.0095	2.825	0.7595	0.3064	3.0856	0.1488	0.2229	0.2921	0.8709	0.2214	0.1985	0.2213	0.597	0.6274	0.3868	1.1648	0.8158	0.2862
HMGB3P2	0.0409	0	0	0	0.1413	0.0638	0.0746	0	0.0302	0.0612	0	0.0556	0	0.0561	0.0154	0	0	0.1095	0	0.0418	0.0377	0	0.0201	0.0464	0	0	0	0	0	0.0197	0.0219	0	0	0.02	0.0244	0	0.0329	0	0	0	0	0	0.1658	0	0	0.0376	0	0	0
RSU1P3	0.0573	0.0634	0.055	0	0.0659	0.0669	0	0	0	0.0428	0.0199	0	0	0.0392	0.0323	0	0	0	0.1011	0	0.0264	0.0139	0.0421	0.0162	0	0.0833	0	0.0295	0.0218	0.0138	0	0	0.015	0.014	0.0342	0	0	0	0.0168	0.0452	0	0	0.058	0	0	0.0263	0	0.0188	0
AHSA2P	2.8672	4.6387	4.186	1.3783	2.3929	4.1139	5.9251	2.4618	4.1309	4.5325	2.194	3.1346	3.4578	5.5626	3.1608	6.5677	3.5057	4.2259	6.7643	10.1755	6.8508	3.4403	4.0258	3.9733	2.2927	3.6228	3.485	3.4029	2.9838	3.4355	2.4542	4.2618	7.7808	10.7555	2.3768	3.2071	1.5387	0.9898	3.4118	3.5959	3.2963	2.0414	5.6789	3.5963	2.7198	3.5517	2.4442	4.6769	0.5177
IL21-AS1	0.0096	0	0	0	0.1395	0.005	0.0116	0.1041	0	0.0048	0	0.0116	0.0056	0	0.0024	0	0	0.0043	0	0.0033	0	0.0217	0.0156	0	0.0341	0.0371	0	0.0656	0.0146	0.0061	0	0	0.0067	0	0	0.0069	0	0.0064	0	0	0.0209	0.0366	0.0474	0.0042	0.0037	0	0.0093	0	0
AC131159.1	0.6736	1.0767	2.8054	0	0.2583	0.6997	0	0.4276	1.2422	1.2579	0.9385	1.0165	0.64	2.4596	1.7703	0.5375	0.6781	1.4265	2.2995	1.0889	0.7233	0.7649	0.3852	1.3347	1.1462	0.9794	1.0787	1.2704	1.9641	1.9421	1.1433	1.124	0.472	1.6458	1.139	1.5184	0.5406	0.4529	0.9858	1.3004	0.3669	0.3677	1.1363	1.0445	0.3293	1.1871	1.3647	1.255	0.1878
RN7SL601P	0	0	0	0	0	0	0	0	0	0	0.0569	0	0	0	0	0	0	0	0	0	0	0	0	0	0	0	0	0.1259	0	0	0	0	0	0	0	0	0	0	0	0	0	0	0.2203	0	0	0.0375	0	0	0
AC090312.1	0	0	0	0	0.0395	0	0	0	0	0	0	0	0	0	0	0	0	0	0.0485	0	0	0	0	0	0	0	0	0.106	0	0	0.0368	0	0	0	0	0	0	0	0	0	0	0	0.0464	0	0	0	0	0	0
RF00019	0.5338	0.9451	0.4104	0	0	0.3327	0	0.2323	0.7875	0.4784	0	0.6766	0	0.877	0.4008	0.4381	0.2866	1.8562	0.4524	1.1989	0.1965	0.2078	0.4186	0.1209	0.2076	0.6209	0	0.4393	0.1624	0	0.1144	0.1527	0.3366	0	0.6371	0.231	0	0	0.25	0.1124	0	0.1748	0.5763	0	0.2505	0.1963	0.2076	0.5616	0
IRF5	1.4649	0.3065	0.5743	1.0811	0.9244	0.3662	0.1992	0.1457	0.8709	1.086	0.613	0.3167	0.8341	0.3443	0.7039	0.9607	0.2018	1.1879	0.2007	0.7868	1.3935	1.0427	0.5385	0.3002	0.2365	0.4292	0.2206	0.3542	0.7151	0.6146	0.2314	2.0403	1.1575	0.4728	0.2414	1.0467	0.1579	0.4713	0.2848	0.8115	0.2769	0.3446	1.4531	0.2143	0.1635	0.4624	0.2578	0.2408	0.1463
DUX4L12	0	0	0	0	0	0	0	0	0	0	0	0	0	0	0	0	0	0	0	0	0	0	0	0	0	0	0	0	0	0	0	0	0	0	0	0	0	0	0	0	0	0	0	0	0	0	0	0	0
TNRC18P2	0.0088	0.0065	0	0.0051	0.0051	0.0137	0	0.0336	0.026	0	0.0061	0.012	0	0.006	0.0959	0.0241	0	0.0059	0.0062	0.0135	0	0	0.0302	0.01	0.0043	0.0342	0.0113	0.0589	0.0134	0.0085	0.0047	0	0.0046	0	0.0105	0.0048	0.0071	0.0089	0.0103	0	0	0.0144	0.0892	0.0176	0.031	0.0122	0.0043	0.0232	0
IL25	0.0087	0.0387	0	0	0	0	0	0	0.0129	0	0.0122	0.0079	0.0153	0	0	0	0.0117	0	0	0.0536	0	0.0085	0.0086	0	0.017	0	0.0336	0.009	0	0	0	0.0125	0.0092	0.0171	0	0	0	0	0	0.0092	0.0143	0.0286	0.0354	0	0	0.008	0	0	0.0146
CXCL2	0.8529	1.7994	0.143	0.6046	0.376	0.0373	2.1647	0.1041	0	0.4287	0.1333	0.3103	0.1468	0.0764	0.1077	0.4034	2.632	0.9169	0.1464	0.3581	0.4549	0.6284	0.2813	0.1805	0.1085	0.68	0.1532	0.3772	0.5214	0.2451	0.2905	0.2508	0.1508	0.1246	0.0761	0.1639	0.0256	1.447	0.2333	0.0588	0.8207	0.8875	0.4948	0.1589	0.3554	0.0513	0.093	0.3984	0.32
SORCS2	2.9906	3.058	0.6379	1.6588	7.1168	3.9547	7.7896	5.4517	12.5765	2.1291	4.119	1.8149	5.2406	1.9619	1.7581	4.0389	6.674	1.6531	9.9834	0.4986	7.1078	8.2253	7.6351	1.6309	3.8979	2.2402	5.1044	14.4766	3.343	3.8873	8.6211	9.6451	1.677	1.1487	6.242	13.4402	1.9384	4.9783	2.8651	1.4888	2.5612	1.3544	0.8915	1.4364	7.1423	2.1441	2.8475	0.8513	0.4179
OR9A4	0	0.0484	0	0.0255	0.1133	0	0	0	0	0.0654	0.0152	0	0	0.03	0	0.0599	0	0	0.1545	0.0112	0.0403	0.0106	0	0.0248	0.0425	0.0318	0	0.0788	0	0.0105	0.0352	0.0782	0.0345	0.0428	0.0131	0.0355	0	0.011	0	0.0461	0	0	0.0591	0.0291	0.0385	0	0	0	0
RF00019	0	0.3675	0	8.139	0	0	0	0	0	0	1.2146	0.1128	0	0	0	0	0	0.6663	0	0	0.2293	0.1212	0	0	0.1211	0	0.1596	0	0.1895	0	0	0	0	0	0	0	0	0.5024	0	0	0	0	0	0	0	0.229	0	0	0
SRXN1	0.7357	0.2158	0.7099	0.393	0.6017	0.9114	0.3069	0.7571	0.4184	0.5892	0.4322	0.65	0.8123	0.6796	0.5757	0.7153	0.6424	0.3793	0.3318	0.6244	0.31	0.936	0.5039	0.4064	0.5128	0.2406	0.5678	0.4878	0.6607	0.3961	0.5036	0.6592	0.2795	0.4028	0.3279	0.6905	0.2561	0.3173	0.4825	1.2786	0.4128	0.3701	0.5861	0.5831	0.4472	1.035	0.4353	0.4313	0.1853
NT5C1A	0.0972	0.0478	0.0554	0.9579	0.1988	0.0673	0	0.047	0.0159	0.0807	0.1956	0.0391	0	0.0148	0.0243	0	0.0145	0.1011	0	0	0.0398	0.0736	0.2012	0.0122	0.084	0.0105	0	0	0.0822	0.2906	0.0579	0.0463	0.0114	0	0.2192	0.0234	0	0.3159	0.0126	0.0227	0.053	0.0177	0.0146	0.0144	0	0.0199	0.0315	0.0284	0
AC017007.1	0	0	0	0.0336	0.0994	0	0.1575	0.0314	0.0425	0.0861	0.0401	0	0.0253	0	0	0	0	0	0	0	0	0.028	0	0.0326	0	0.0559	0	0.0296	0	0.0277	0	0	0	0.0845	0.0344	0	0	0	0.0337	0.0607	0	0	0.1166	0	0	0.053	0.1681	0	0
AP002907.1	0.3428	0.5675	0.5572	0.4098	0.5002	0.5732	0.9601	0.282	0.4441	0.2873	0.4194	0.4088	0.4546	0.5037	0.3516	0.4232	0.4265	0.3355	1.0512	1.2036	0.8619	0.6103	0.4754	0.2556	0.3821	0.5673	0.2785	0.6709	0.229	0.5625	0.3137	0.562	0.6591	0.4576	0.509	0.7961	0.2147	0.2277	0.2741	0.317	0.3416	0.2601	0.4062	0.2222	0.4905	0.3613	0.2033	0.4838	0.2377
RF02043	0	0	0	0	0	0	0	0	0	0	0	0	0	0	0	0	0	0	0	0	0	0	0	0	0	0	0	0	0	0	0	0	0	0	0	0	0	0	0	0	0	0	0	0	0	0	0	0	0
NIPSNAP3B	1.5207	5.5645	2.7928	5.8168	2.6528	4.8412	1.6209	3.2556	2.8022	5.0353	2.784	2.8183	2.778	5.397	2.7288	3.7545	3.3011	2.7681	3.0553	7.4039	6.326	3.4943	3.3526	3.4995	1.8148	2.3095	3.1297	2.609	6.4139	3.2552	3.3484	4.2476	3.3579	6.5241	4.3835	2.6787	1.4099	1.8658	3.5091	2.9249	3.2656	4.4675	3.8302	2.7871	3.24	3.397	2.9095	3.3211	2.3321
BNIP3L	38.4798	61.8159	42.6178	30.6945	59.9612	49.4605	75.8044	40.1944	35.5442	35.7355	45.7273	51.3437	68.6964	62.9393	53.1526	70.7087	61.4999	31.6008	58.3623	42.6271	40.1561	33.9545	58.7832	42.2302	50.1898	61.4297	67.9337	53.2085	53.4447	58.6606	57.6778	42.8361	45.2057	59.4036	56.3222	56.32	49.124	31.256	53.7422	46.5423	88.7712	62.3335	35.778	41.9457	57.8561	38.0165	56.3527	48.4414	50.1068
AC090453.1	0	0	0.0351	0	0	0	0	0	0.0405	0	0	0	0	0	0	0	0	0	0	0	0.0505	0	0	0.0311	0	0.0266	0	0.0564	0	0	0	0	0	0	0	0	0	0	0	0	0	0	0.037	0	0	0	0	0	0
OR7D4	0	0	0	0	0.0269	0	0	0	0	0	0.0326	0	0	0	0	0	0	0	0	0	0	0	0	0.0265	0	0	0	0	0	0	0	0	0	0	0	0	0	0	0	0	0	0	0.0474	0	0.0137	0.0108	0	0	0
RF00019	0.1128	0	0	0	0.2596	0	0	0	0	0.5055	0	0.1021	0	0.3089	0.0847	0.3086	0.1514	1.2069	0	0.1152	0.4153	0	0	0.1277	0.1097	0.328	0	0	0	0.1084	0.1209	0	0	0	0	0	0	0	0.2641	0.2375	0.7374	0	0.1522	0	0	0	0.1097	0.1483	0
AC068987.1	2.0161	4.1314	0.8612	0.3268	1.1598	2.225	0.4593	1.036	2.1894	2.0497	0.5852	1.1409	1.2279	0.8818	1.7031	1.5321	1.0148	1.0486	2.4128	7.3757	1.3402	4.0607	4.1173	2.6315	3.6211	1.0857	1.5426	2.1604	1.065	1.5877	1.2907	2.4029	2.7663	0.6294	1.8048	1.4542	1.8878	0.1977	0.754	2.6536	1.4644	0.8253	1.0203	1.4142	1.2485	1.7507	2.3691	1.1048	0.0937
S100A6	125.8229	47.7276	21.1917	118.3316	30.8143	8.2115	94.3503	21.0499	29.3378	55.9575	46.4743	46.7369	36.5339	50.514	34.9316	33.3664	42.7078	185.2625	31.6395	78.5605	71.6506	47.6146	18.927	55.2541	44.108	55.8257	34.8167	48.3756	17.796	61.1942	81.3368	67.1508	199.4806	229.7601	23.9713	38.9158	70.0097	46.2589	26.381	23.7408	111.283	179.8094	53.0101	16.9707	40.4115	13.4164	31.8408	18.9314	33.0335
AC010501.1	0.2986	0.1798	0.3827	0.0996	0.2945	0.2943	0	0.2255	0.7732	0.3733	0.1783	0.2262	0.2726	0.1585	0.2059	0.2334	0.0982	0.269	0.1205	0.7155	0.4375	0.261	0.6631	0.2346	0.3614	0.1122	0.2655	0.4012	0.2225	0.3163	0.209	0.4096	0.2818	0.0715	0.2037	0.2637	0.7434	0.0615	0.1998	0.1091	0.0896	0.3293	0.2632	0.2025	0.2074	0.678	0.3793	0.3526	0.1121
TOMM22P3	0	0	0	0	0.0399	0	0	0	0	0	0	0	0	0	0	0	0	0	0	0	0	0	0	0	0	0	0	0.0357	0	0	0	0	0.0364	0	0	0	0	0	0	0.0365	0	0	0.2806	0	0	0	0	0	0
RPL10P9	24.3769	115.0098	8.813	18.1276	107.7282	93.2333	291.5754	11.3766	11.0756	17.0308	13.1973	130.983	15.1357	14.2394	16.2577	9.4579	15.6255	22.8594	6.4939	9.5764	143.7628	46.2954	7.2141	4.2608	1.9466	12.4526	10.2358	20.9954	6.6835	69.4622	7.9088	6.2834	273.8267	17.1567	3.8277	61.0117	9.4623	11.0675	16.5152	4.4504	17.8131	277.0943	14.3845	8.6967	16.487	143.3925	6.2374	9.0448	24.8338
FAM71C	0.02	0	0.0171	0	0.0383	0.0311	0	0.0072	0	0	0	0.0181	0.0058	0.0091	0	0.0091	0.0625	0.0445	0	0.0544	0	0	0.0131	0.0075	0.0065	0	0	0.0205	0.0101	0.0128	0	0	0.007	0	0.0079	0.0144	0	0.0067	0.0156	0.007	0	0.0327	0.0449	0.0088	0.0078	0.0061	0	0.0088	0
RN7SL340P	0	0	0	0	0	0	0	0	0	0	0	0	0	0	0	0	0	0.054	0	0	0	0	0	0.0457	0	0	0	0	0	0	0	0	0	0.079	0	0	0	0	0	0	0	0	0.1635	0	0	0	0	0	0
AL589763.1	0	0	0	0	0	0	0	0	0	0	0	0	0	0	0	0	0	0	0	0	0	0	0	0	0	0	0	0	0	0	0	0	0	0	0	0	0	0	0	0	0	0	0	0	0	0	0	0	0
PTPN14	10.2508	18.3363	20.474	3.5395	3.8697	24.5987	1.8613	13.5307	4.8668	55.3663	4.1068	16.0233	15.8113	27.3051	3.6843	38.6093	43.916	6.0297	42.0706	13.0981	8.8128	16.8983	13.8035	48.838	105.2724	8.1253	22.2462	8.9284	24.2952	33.0337	21.4894	15.6333	6.7112	22.4991	25.3267	6.911	24.8173	2.7028	7.1997	37.1101	4.2193	10.6594	8.221	11.0411	3.5611	25.6761	30.3791	23.1287	3.7092
FO393414.2	0	0	0	0	0.046	0	0	0	0	0	0	0.0181	0	0	0	0	0	0.0535	0	0	0	0	0	0	0	0	0	0.0206	0	0	0	0	0	0	0	0	0	0	0	0	0	0	0	0	0	0	0	0	0
AL591926.8	0.0567	0.0836	0.0726	0	3.1295	0.4415	0	0	0	0.0847	0	0	0.0994	0.1552	0.2553	0	0.8367	0	0.4002	0.405	0	0.1103	0.5555	0.6416	0.1102	0.2746	1.089	0.2915	0.1724	0.0545	0.0607	0	0	0.0554	0.2705	0.0613	0.091	0.0571	0.199	0	0.7409	0.2784	0.0765	1.3556	0	0.2084	0	0.4472	0
AC006557.2	0	0	0	0	0.0222	0	0	0	0	0	0	0	0	0.0132	0	0	0	0	0	0.0197	0	0	0	0	0	0	0	0	0	0	0	0	0.0101	0	0	0	0	0.0194	0.0113	0	0	0	0.026	0	0	0	0	0	0
APOA5	0	0	0	0	0.0213	0	0.0225	0.0134	0	0	0	0	0	0.0084	0	0	0.0166	0.0165	0	0.0126	0	0	0.0242	0	0	0.006	0	0.0127	0	0.0178	0	0	0	0.006	0.0147	0.0334	0.0198	0	0.0072	0	0	0	0	0	0	0	0.006	0	0
ZDHHC23	0.2178	0.739	0.6955	0.0723	0.2602	0.8456	0.0336	0.1349	1.028	0.533	0.154	0.4884	0.4011	0.1101	0.322	0.8019	0.3013	0.7931	0.5679	1.5631	0.9312	1.3597	0.6782	0.863	1.6434	0.6186	0.7232	0.5376	0.53	0.8983	0.7308	1.5428	1.1813	0.4911	1.3935	0.3697	0.8604	0.1216	0.1883	1.9843	0.4298	0.3456	1.0127	0.7257	0.4304	0.8301	1.6974	0.5243	0.5519
LCN8	0.0118	0.0174	0.0303	0.0184	0.0045	0.0184	0.0143	0.0086	0	0	0.0219	0	0.0518	0.0054	0.003	0.0108	0.1321	0.4474	0.05	0.0603	0.029	0.0268	0.0077	0.0357	0.0077	0.0725	0.0151	0	0.1138	0.0038	0.0042	0.0056	1.6876	0	0.0094	0.0383	0.0126	0.0119	0	0.0207	0	0.1418	0.0106	0	0.0139	0.0217	0.0038	0.0052	0.0197
RPS29P4	0	0	0	0	0	0	0	0	0	0	0	0	0	0	0	0	0	0	0	0	0	0	0	0	0	0	0	0	0	0	0	0	0	0	0	0	0	0	0	0	0	0	0.1002	0	0	0	0	0	0
RPS5	310.9018	216.5866	169.0352	600.1372	191.8054	231.5352	533.0126	229.505	214.9694	202.1557	427.0839	267.0577	511.502	190.2799	278.162	439.291	345.3995	228.2024	162.1288	279.5959	161.3398	116.6595	148.5197	185.1027	96.5729	163.4016	146.2606	228.5842	178.4489	184.9954	137.815	122.8413	198.7248	186.1744	93.5886	140.1401	246.0573	317.7314	271.6934	221.7989	609.0708	559.8215	353.865	189.4877	310.7519	179.0688	166.1275	150.7881	2642.9305
WNT7B	0.0379	0.0699	0.0455	0.0249	9.6359	0.0111	0.0086	0.0026	0.1397	0.0919	0.0066	0.0429	0.0062	0.0194	0.064	0.0097	0.0572	0.2533	0.0201	0.0073	0.0828	0.0046	0.181	0.0107	0.0138	0.0987	0.0091	0.1485	0.0828	0.0819	0.0609	0.1625	0.0721	0	0.1356	0.0384	0.0114	0.0095	0.0249	0.0449	1.7834	0.0155	0.0831	0.0094	0.0972	0.0261	0.0207	0.0965	0.0198
RPL23AP76	0	0	0	0	0	0	0.0952	0	0	0	0.0364	0	0.0229	0	0	0	0	0	0	0	0	0	0	0	0	0	0	0	0	0	0	0	0	0	0.0312	0	0	0	0	0	0.0427	0	0.0352	0	0	0	0	0.0687	0
RNU6-1337P	1.0069	1.1142	1.4515	0	0.5792	1.5688	0.6882	1.6434	1.4854	3.3843	0.8767	3.0768	1.3246	3.4466	3.1186	1.0329	1.1825	3.8717	1.0667	2.4414	2.7802	1.9599	0.3701	1.7101	1.5909	0.732	2.5799	1.2947	0.5744	1.0886	1.0793	1.08	1.3228	2.7061	0.6009	2.4511	2.0203	0.1269	1.6208	1.7228	0.2057	1.6487	0.5095	0.6691	1.6244	0.9258	1.3463	2.3173	0.6315
AC005077.4	0.5884	2.0594	1.1398	0.0279	0.2204	1.0234	0.0062	0.1712	1.0649	3.4088	0.8865	0.7992	0.255	0.342	1.0506	5.3393	0.3168	0.1784	9.1914	1.687	0.9068	0.8324	0.3655	1.4642	3.3097	0.8257	1.4902	2.0095	0.8795	2.3837	3.3628	0.2544	0.1978	0.4514	1.7068	0.4664	1.7463	0.3485	0.3164	7.1361	0.0895	0.0952	0.8726	0.9184	0.6984	4.4383	4.834	0.3914	0
AC044784.1	0	0	0.0226	0	0	0	0	0	0	0	0	0	0	0.0242	0	0	0.0237	0	0	0	0	0	0	0	0	0.0685	0	0.0182	0	0	0.0189	0	0	0	0	0.0191	0	0	0	0	0	0	0.0953	0	0	0	0	0	0
HNRNPA1P54	0.0135	0.0145	0.0237	0.0215	0.0326	0.0249	0.0763	0.0107	0.0291	0.0294	0.0171	0.0178	0.0086	0.027	0.012	0.0152	0.0182	0.0428	0.0278	0.0239	0.0227	0.0467	0.0109	0.1226	0.0431	0.0107	0.0189	0.0696	0.0281	0.0106	0.0013	0.0493	0.0569	0.0337	0.0118	0.028	0.0059	0.0037	0.0058	0.0246	0.0221	0.0383	0.9435	0.0131	0.0246	0.0181	0.012	0.0162	0.035
AL365396.1	0	0	0	0	0	0	0	0	0	0	0	0	0	0	0	0	0	0	0	0	0	0.0173	0	0.0202	0	0	0	0	0	0	0	0	0	0	0	0	0	0	0	0	0	0	0	0	0	0	0	0	0
AC007560.1	0.0505	0.3722	0.1293	0	0.2902	0.1572	0	0	0.1489	0.5276	0.1406	0.9136	0.0885	0.2072	0.4925	0.276	0.0677	0.0675	0.4276	0.3605	0.0929	0.2946	0.0495	0.5141	0.1472	0	0.1939	0.3114	0.0767	0.4364	0.703	0.3608	0.053	0.2958	0	0.1092	0	0.407	0.2362	0.1062	0.1649	0.1652	0.4085	0.6705	0.1776	0.4639	0.3925	0	0
RNU6-602P	0.1139	0.672	0	0	0.393	0	0	0.1239	0	0	0	0.4124	0.0999	0	0	0	0	0.1523	0	0.1163	1.0481	0	0.1116	0	0	0	0	0.2343	0	0.1094	0	0	0	0	0	0	0	0.3445	0	0	0	0	0	0.1513	0	0.1047	0	0	0
SATB1	2.0143	10.1882	8.6361	2.4442	7.9181	3.119	8.5712	10.7041	2.1666	7.261	5.399	6.2004	5.6251	5.4869	2.4043	13.3458	6.2595	6.8157	9.4417	6.8724	5.3379	6.672	10.1281	6.6171	8.9371	6.6754	2.6092	15.4258	10.4736	6.9525	3.0778	4.3589	5.2349	4.5229	9.3434	5.3882	0.8302	5.3444	8.6624	9.1442	5.6307	7.0812	7.4764	7.2858	18.074	8.1723	7.0958	11.319	4.3532
AC103952.1	0.0203	0.0299	0.026	0.0473	0.2332	0.8841	1.4405	0.1544	0.0598	0.8779	0.1129	0.2569	0.16	0.9157	1.0956	0.4435	0.0544	0.1897	0.0859	0.9104	0.0373	0.2367	0.1788	0.2065	0.2956	0.0786	0.0779	0.1251	0.0617	0.2337	0.1955	0	0.0852	0.7526	0.0484	0.4385	0	0.1022	0	0.3414	0.0662	0	0.082	0.808	0.0238	0.1863	0.1182	0	0.5423
IMMT	19.276	23.9524	25.6542	22.7912	28.5417	27.93	20.4308	22.5774	24.1485	25.4076	31.2306	21.5021	22.7716	24.1876	35.5739	17.5282	22.7119	15.0207	20.3131	21.805	23.0037	20.6289	30.4456	21.659	16.2485	25.2737	29.4294	31.0734	23.5649	28.4794	29.6082	25.3887	11.715	15.8336	24.969	30.1049	29.0149	26.4824	25.6427	22.691	22.2802	11.9549	34.3642	23.0465	30.7614	25.1808	25.4689	29.3352	4.761
LINC01322	0	0	0.0082	0.0375	0.1331	0	0	0.007	0	0.0384	0.0985	0	0	0	0	0	0.0259	0.0086	0	0	0	0	0.0189	0.0073	0.0313	0	0	0.0265	0	0	0	0	0	0	0	0.0904	0	0.0778	0	0	0.4727	0	0.1041	0.0513	0.0075	0	0	0	0.0215
DDX59	4.3306	5.7936	3.5785	4.4293	3.2807	3.8759	5.0605	3.0474	4.3249	7.2485	2.1279	3.6522	4.4196	4.2302	2.7697	5.243	3.4574	4.1857	7.6777	5.5301	4.5004	2.9236	3.3458	6.6631	9.0873	5.8754	4.2527	5.03	5.5016	6.293	2.4688	4.1584	2.8759	5.4009	3.6907	4.48	3.1043	2.6302	3.4039	5.65	4.7254	4.4849	3.7145	3.203	3.2892	4.3334	4.5911	4.0139	2.2681
TPTE2P4	0	0	0	0	0.0086	0	0.2851	0	0	0.0223	0	0	0	0	0	0	0	0	0.021	0	0	0	0	0.0169	0	0.0144	0	0	0.0113	0	0	0	0	0	0	0	0	0	0	0	0	0	0.0101	0	0	0	0	0	0
PAN2	5.5042	15.6781	10.0239	1.9642	4.6189	7.2391	7.5202	5.227	8.5823	7.9847	4.8022	7.1493	5.8517	6.5369	7.4085	16.2942	6.5533	5.4307	12.8641	13.1384	8.6614	11.6817	7.2949	12.8843	12.1887	7.1213	7.886	6.0402	9.3168	6.6962	7.8752	9.7374	9.7299	8.1692	10.6876	14.8304	10.3388	5.2449	4.0103	11.709	4.3032	2.3881	7.6804	6.1879	5.8789	6.4486	13.1271	6.3434	1.2649
RN7SL330P	0	0.1724	0.1996	0	0.0448	0.2427	0	0.1271	0.1149	0.0582	0.0543	0.2468	0.0342	0.0533	0.0877	0	0.1568	0	0.3301	0.1988	0.0717	0.0758	0.0382	0.1764	0.1515	0.1133	0.0998	0.1603	0.0592	0.1871	0.0417	0	0.1228	0	0.0465	0.0421	0	0.0393	0	0.082	0	0.0638	0.3679	0	0	0.0358	0.0379	0.1024	0.0651
RNU6-1143P	0	0.1696	0	0	0.1323	0	0	0.1251	0.1696	0.1717	0	0	0.2017	0.1574	0	0.1573	0.3086	0.3075	0	0.1174	0	0.1119	0.1127	0.1302	0.1118	0	0	0.1183	0	0	0	0.3289	0.2417	0	0.1372	0.1244	0	0	0.4038	0	0	0	0.1552	0	0	0	0	0.1512	0
AC104333.1	0	0	0	0	0	0	0	0	0	0	0	0	0	0	0	0	0	0	0	0	0	0	0	0	0	0	0	0	0	0	0	0	0	0	0	0	0	0	0	0	0	0	0	0	0	0	0	0	0
AC010789.1	0	0	0	0	0	0	0	0	0	0.0614	0.0572	0	0	0	0	0	0	0.1649	0	0.1678	1.1345	0	0.0806	0.093	0.2397	0.0398	0	0.7185	0.1875	0	0	0.4701	0.0432	0	0	0	0	0.0414	0	0.0433	0	0	0.7208	0	0.7714	0.1133	0.04	0	0
PRSS58	0	0	0	0	0.131	0	0	0.0338	0	0	0	0	0	0	0.0233	0.0142	0	0.0138	0	0	0	0	0	0.0117	0	0.01	0.0265	0.0532	0	0	0	0	0.1088	0.0101	0	0.0112	0	0	0	0.0436	0	0	0	0.0138	0	0.019	0.0101	0	0
SNORA74C-1	0	1.2287	0.4574	0.0694	0.0684	0.4634	0	0.1295	0	0.2666	0.3315	0.4309	0.2608	0.2444	0.134	0.4882	0.3194	0.3182	0.7562	0.7288	0.1095	0.2895	0.5248	0.4715	0.0578	0.2306	0	0.0612	0.0905	0.4574	0.1275	0.1702	0.0625	0	0.568	0.2574	0.2865	0	0.1393	0.3758	0	0	0	0.0791	0.1396	0.1094	0.2892	0.3129	0
AP002383.3	0	0	0	0	0.3668	0.1911	0.2906	0	0.0181	0	0	0	0	0	0	0	1.0699	0.0328	0	0.025	0.0677	0	0.024	0	0.0119	0	0.0314	0	0.0373	0	0	0	0	0.1318	0.0146	0	0	0	0.3015	0	0.02	0	0.0496	0	0	0.1353	0.0716	0.0323	0
RF00191	0.1696	0	0	0	0.0976	0	0	0.0923	0	0	0.1181	0	0	0.2322	0.1273	0	0.1138	0.2268	0.2396	0.0866	0	0	0.0831	0.192	0	0.3288	0	0.1745	0	0	0	0	0	0	0.1012	0	0	0	0	0	0	0.1388	1.0299	0	0	0	0	0	0
ITGA2B	0.7	0.5053	0.276	0.1759	0.0991	0.1376	0.1727	0.2672	0.429	0.3797	0.1981	0.3257	0.7141	0.8553	0.5968	1.1255	0.2949	0.1757	0.2738	0.8225	0.1348	0.2075	0.3653	0.2902	0.1152	0.4552	0.5133	0.37	0.2458	0.3167	0.2124	0.1078	0.3192	0.9136	0.2442	0.5244	0.2628	0.113	0.2043	0.4332	0.1408	0.1164	0.4564	0.0973	0.273	0.2198	0.2828	0.2465	0.0612
MIR4456	0	0	0	0	0	0	0	0	0	0	0	0	0	0	0	0	0	0	0	0	0	0	0	0	0	0	0	0	0	0	0	0	0	0	0	0	0	0	0	0	0	0	0	0	0	0	0	0	0
AL662889.1	0	0	0	0	0.0707	0	0	0	0	0.0459	0	0	0	0	0	0	0	0.1233	0.1737	0	0	0	0	0.0348	0.0299	0	0	0.0949	0	0.0295	0	0.044	0.0323	0.0601	0.0367	0	0	0	0.036	0	0	0	0.083	0	0	0	0.0598	0	0
AL021396.1	0.0052	0.0538	0.0401	0	0.042	0.0081	0	0.017	0.0077	0.0311	0.029	0.0236	0.032	0.0071	0.0235	0.0642	0.007	0	0.0368	0.0426	0.0192	0.0862	0.0307	0.0059	0.0203	0	0.0067	0.0643	0.0159	0.0301	0.0279	0	0.0548	0.0204	0.0498	0.0282	0.0084	0.021	0.0183	0.0713	0.0256	0.0256	0.0633	0.0416	0.0245	0.0288	0.0558	0.0206	0
AC022405.1	0.0232	0.3077	0.1188	0.027	0.16	0	0.2956	0.0252	0.0684	0	0.1291	0.0629	0.061	0.0952	0.1218	0	0	0.3719	0.1309	0.1419	0.2559	0.0902	0.1136	0.0262	0.0901	0.3145	0.0594	0.143	0.0705	0.1336	0.0497	0.0663	0	0	0.0553	0.0501	0	0	0.1356	0.0732	0.1893	0.1138	0.4065	0.0616	0.0272	0.0639	0.0451	0.1828	0
KIN	2.804	3.2968	2.6753	1.9245	2.3819	3.2392	2.8689	2.0911	1.4407	3.9512	2.6993	2.6637	2.476	2.6528	3.7426	2.6334	1.6203	3.0633	3.5561	3.3675	3.2931	2.6338	2.0876	2.3876	2.6618	3.0178	3.1782	3.012	2.578	3.049	1.9907	3.2257	1.3881	3.466	3.7179	2.8901	1.8845	2.0033	3.072	3.7546	2.8236	2.8177	4.1659	2.7676	1.9781	1.4023	2.6571	2.8467	1.7823
ITIH6	0.0044	0.0064	0.0251	0	0.0225	0.0034	0.0159	0.0379	0.0321	0.0325	0.0303	0.0059	0.0114	0.003	0	0.003	0.0146	0.0116	0.0061	0.0067	0.008	0.0042	0.0171	0.0123	0.0085	0.0127	0.0056	0.0134	0.0033	0.0167	0.0023	0.0031	0	0.0021	0.0338	0.0188	0	0.0175	0.0025	0.016	0	0	0.0969	0.0145	0.0051	0.006	0.0021	0.02	0
AC087477.6	0.0709	0.6697	0.4362	0	0.0816	0.7956	0	0.0926	0.0837	0.0212	0	0.0771	0.0498	0.1554	0.0852	0.194	0.0381	0.019	0.1202	0.7675	0.6005	0.2071	0.1112	0.0482	0.6344	0.0275	0.1272	0.1897	0.2373	0.2726	0.1672	0.5071	0	0.1248	0.3216	0.3836	0.3187	0.0286	0.0996	0.0597	0.0927	0.0232	0.1531	0.0189	0.0499	0.2217	0.1655	0.3544	0.0237
CFAP65	0.0023	0.0101	0.0044	0.0053	0.1909	0.3914	0.0021	0.0025	0.0117	0.0594	0.0095	0.0401	0.0897	0.1743	0.0102	0.07	0.0046	0.0122	0.0064	0.2843	0.1172	0.0188	0.0045	0.1892	0.3338	0.0154	0.0699	0.0082	0.0017	0.0317	0.0024	0.0244	0.0108	0.1144	0.0041	0.0123	0.0073	0.0126	0.0027	0.4129	0.052	0	0.0828	0.0816	0.0067	0.0042	0.0166	0.0015	0.0266
DVL1	12.9514	6.5079	13.2077	11.2069	8.6699	15.4977	4.9698	13.5703	6.3553	7.0247	8.998	11.186	14.2071	18.5412	13.2145	11.058	17.8485	18.2257	4.094	16.4898	13.4988	9.9812	13.5363	12.9634	13.3832	11.3673	15.0588	15.627	8.8129	9.8823	11.7213	15.457	21.7836	11.1323	7.9952	14.4839	16.3846	8.7861	14.3752	14.9231	3.7948	4.6108	10.9469	26.0786	17.5385	11.0786	14.1391	14.146	2.4667
AC245028.1	0	0	0	0	0	0	0	0	0	0	0	0	0	0	0	0	0	0	0	0	0	0	0	0	0	0	0	0	0	0	0	0	0	0	0	0	0	0	0	0	0	0	0	0	0	0	0.0908	0	0
AF127577.3	0.3521	0.0904	0	0.0357	0.0176	0.0477	0	0.0167	0	0.0229	0.0427	0.0139	0	0.0419	0.0575	0.0419	0	0.0614	0.0433	0.0782	0.1409	0.0596	0.015	0.0173	0.0149	0.0594	0.0196	0	0.0233	0	0	0.1752	0.0483	0.0299	0.1096	0.0331	0	0.0309	0.0717	0	0.025	0.0501	0.2686	0.061	0.018	0.0422	0.0149	0.1208	0
MTCO1P2	0.7654	0.1255	0.2615	0.3969	0.3522	0.0795	0.124	0.2406	0.2007	0.3811	0.2607	0.2618	0.0298	0.3959	0.5364	0.0465	0.1826	0.5004	0.1441	0.191	0.3131	0.298	0.1834	0.077	0.463	0.2638	0.3268	1.0323	0.4916	0.1961	0.5834	0.3405	0.9653	0.3491	0.2436	0.184	0.2457	0.3087	0.1394	0.197	0.6949	0.557	0.505	0.1356	0.1596	0.563	0.4962	0.1342	0.2845
RNVU1-15	0.2174	0.7484	0.3714	0.7611	0.1667	0	0.1321	0	0.1069	0.3248	0.8077	0.3281	0.2542	0.3969	1.0882	10.6058	0.5836	0	0	0.148	0.1334	1.9042	0	0.7384	0.4932	0.5619	0.0928	0.0745	0	0.4179	0	0.1036	0.2285	0.4249	0.346	0.4704	1.3958	0.4385	0	1.6024	0	0.1187	1.4669	0.1926	0.085	0.3331	1.057	0.2859	3.8783
PRICKLE4	0.1395	0.1029	0.1162	0.0081	0.1926	0.1848	0.1144	0.1518	0.1544	0.0834	0.0778	0.1516	0.2202	0.1433	0.1309	0.0763	0.103	0.3359	0.1281	0.6552	0.3724	0.3191	0.3898	0.3238	0.1017	0.3854	0.1877	0.2727	0.0424	0.2011	0.0748	0.2195	0.6672	0.4704	0.1915	0.4378	0.0784	0.0352	0.2368	0.1396	0.114	0.1256	0.1883	0.3801	0.2046	0.1155	0.2035	0.1927	0
MCTP2	1.4124	21.7409	1.4994	0.6332	4.293	0.1177	0.9638	0.6216	0.6048	0.7735	0.7766	0.3153	0.5648	0.4554	2.0587	0.586	0.5552	0.4498	0.4594	0.1834	0.1594	0.5407	2.0754	0.1356	0.3485	3.566	0.3281	17.1503	0.6111	0.4675	6.2534	0.1568	1.5783	0.4718	0.4695	0.918	0.945	1.2348	1.8034	0.1494	2.1259	0.2806	0.4787	0.9	9.5949	0.2609	0.3987	0.5065	0.8721
ATP6V1G2	0.3898	0.7724	1.4344	0.9228	11.5909	1.8135	0.3857	1.2423	0.8216	2.945	1.9474	1.7345	3.0965	1.9978	0.7861	1.752	1.054	2.8006	1.3845	1.2793	3.7418	1.2249	1.2119	1.6142	0.1624	2.4778	1.9049	1.0541	1.2369	1.0758	1.4268	0.9398	2.3236	3.1622	1.223	2.1149	0.733	1.713	1.2127	4.3863	5.6244	1.5319	1.1198	1.7763	2.4242	0.3226	0.8286	1.1279	0.3726
CRYAA2	0	0	0	0	0	0	0.0131	0.0078	0.0213	0	0	0.0065	0.0063	0	0.0108	0	0	0	0	0	0	0	0	0	0	0	0	0	0.011	0.0069	0	0	0	0	0	0	0	0	0	0.0076	0	0	0	0	0.0085	0	0	0	0
TSSK2	0	0	0	0	0	0	0	0	0	0	0	0	0	0	0	0	0	0	0	0	0	0	0	0	0	0	0	0	0	0	0	0	0	0	0	0	0	0	0	0	0	0	0	0	0	0	0	0	0
LINC02529	0.0929	0.0229	0.0397	0.1627	0.0178	0.0241	0.3952	0.0674	0.0457	0.0694	0.0216	0	0	0.0212	0.0465	0	0	0.0207	0.0219	0.0316	0.2851	0.0151	0	0	0.0151	0.0751	0	0.0478	0.0236	0.0595	0	0.0443	0	0	0.037	0.0335	0	0.0312	0.0181	0	0	0.0761	0.0627	0	0	0	0.0301	0	0
AC079809.1	0	0	0.0555	0	0	0	0	0	0	0	0	0	0	0	0	0.0593	0	0.1159	0	0	0.2392	0	0	0.0491	0	0	0	0	0	0	0	0	0	0.127	0	0	0	0	0	0	0	0	0	0	0	0	0	0	0
MIR3119-2	0	0	0	0	0	0	0	0	0	0	0	0	0	0	0	0	0	0	0	0	0	0	0	0	0.1368	0	0	0	0	0	0	0	0	0	0	0	0	0	0	0	0	0	0	0	0	0	0	0	0
FBLN1	60.9529	29.204	88.8762	27.1027	108.7637	24.9933	34.6234	70.0627	12.915	43.6189	42.5167	62.4895	40.5924	28.1288	57.1159	31.365	80.06	91.3618	35.1177	15.5175	9.004	26.2355	55.6931	28.8313	31.46	56.6446	34.1175	50.5018	62.4787	33.8554	31.0157	9.1859	1.4156	12.1198	28.8645	17.9963	43.2421	141.2239	54.7893	34.7797	47.2818	47.107	28.1016	36.0459	57.4236	31.4644	30.3165	46.6517	4.7917
GPHB5	0	0	0	0	0	0	0	0	0	0	0	0	0	0	0	0	0	0	0	0	0	0	0	0.0249	0	0	0.0282	0.0227	0	0	0	0	0	0	0	0	0	0	0	0.0232	0	0	0	0.0293	0.0517	0	0	0	0
IGHV4OR15-8	0	0	0	0	0	0	0	0	0	0	0.0472	0	0	0	0	0	0	0	0	0	0	0	0	0	0	0	0	0	0	0	0	0	0	0	0	0	0	0	0	0	0	0	0	0	0	0	0	0	0
PRTN3	0.6782	0	0.0668	0.0609	0.012	0.065	0	0	0.0462	0.5923	0.3925	0.3117	0.0183	0.0286	0.1175	0.0428	0.2661	0.014	0.0147	0	0	0.0406	0.0102	0.1536	1.0855	0.0809	0	0.0537	0.0317	0.4011	0.0112	0.0149	5.3401	0.0612	0.0374	0.1129	0.1005	0.1789	0.0489	0.1099	0.0171	0.0342	0.0563	0.0139	0	0.0288	0.0609	0.0137	0
AC131009.4	0.5222	1.9162	0.9422	0.0561	0.1897	0.3426	0.3382	0.2094	0.7907	0.852	0.4404	0.5351	0.2893	0.6774	0.8462	0.5452	0.7102	1.2132	0.728	1.3189	0.5945	0.7825	0.4244	0.8636	0.5612	1.0458	0.2377	0.3959	0.1986	0.4623	0.2136	0.3931	1.105	0.5238	0.2625	0.3123	0.1213	0.1663	0.8849	0.5499	0.3032	0.27	1.2241	0.274	0.1371	0.259	0.294	0.5332	0.1149
Z73429.1	0.2426	0.1023	0.1776	0	0.2392	0.378	0.6948	0.4525	0.2045	0.1035	0.0483	0.4707	0.7903	0.2373	0.1561	0.1896	0.3256	0.5099	0	0.6369	0.1276	0.0675	0.2378	0.0785	0.2359	0.2352	0.3552	0.1783	0.0527	0.0666	0.1858	0.1487	0.255	0.0677	0.1241	0.4125	0.2782	0.2097	0.4463	0.0365	0.7363	0.1135	0.1871	0.1382	0.488	0.1593	0.3033	0.2279	0.6956
FAM229A	2.9503	2.3315	1.1687	1.3242	1.0251	0.5893	0.7813	1.061	1.9344	0.7911	0.8022	1.6933	1.5075	3.3088	1.5873	1.7476	1.8107	1.9786	1.0211	2.8319	2.0733	1.3294	1.0135	1.8844	2.0268	1.3729	1.2653	1.4224	0.78	1.3531	0.9731	1.154	4.4125	5.6229	0.7725	1.6961	0.8095	0.3687	1.1612	3.1375	1.8956	2.1057	0.9698	1.2735	1.3906	0.6878	1.0626	1.7134	0.3514
SLC16A3	0.6341	0.6256	1.0612	1.2937	1.0216	0.3749	0.986	0.4874	0.6099	0.3257	0.5519	3.4601	2.1963	2.1422	1.3385	0.6909	4.166	1.9698	1.8683	0.5333	0.4209	0.8435	2.3376	1.046	0.243	0.5231	2.4659	0.9585	1.4863	1.2762	1.8552	0.4334	0.556	1.051	0.6457	1.3231	0.4182	2.5672	2.4868	0.3275	0.6669	0.2155	0.7355	0.7225	0.7564	0.7382	1.2086	0.5839	0.0845
AC133965.1	0	0	0.1298	0.0394	0	0.1579	0.0616	0.0735	0.1993	0.1514	0	0	0.0296	0.0462	0.0761	0	0.0453	0.0452	0.0477	0	0	0.0986	0	0.153	0	0	0.0433	0.0347	0	0.0974	0	0.0483	0	0.099	0.0806	0	0.0542	0.0341	0.1186	0	0.1656	0.1106	1.4586	0	0.1189	0.0311	0	0	0.4519
AC023161.2	0	0.6333	0.2161	0.0179	0.0529	0.1433	0.2514	0.1168	0.0452	0.6641	0.0641	0.3609	0.0941	0.1679	0.046	0.2516	0.0617	0.1025	1.559	0.5165	0.1129	0.179	0.2104	0.2603	0.1043	0.104	0.2946	0.205	0.0933	0.1621	0.0986	0.1315	0.1772	0.1198	0.2561	0.2322	0.1722	0.0773	0.0179	0.226	0.2756	0.1757	0.1448	0.2648	0.0899	0.2819	0.3429	0.2218	0.2564
LINC01222	0.0335	0.0099	0.0258	0	0.0077	0	0	0	0.0099	0.02	0.0187	0	0	0	0.0151	0	0	0	0	0	0.148	0	0	0	0.013	0.0195	0.0086	0.0276	0	0	0	0	1.1757	0	0.024	0.029	0	0.0068	0	0	0	0.0877	0	0	0	0.0062	0	0	0
ALG1L9P	0.2178	0.6748	0.7256	0.0508	0.7267	1.1537	0.1588	0.782	0.7711	0.1301	0.3945	0.4733	0.4202	0.6561	0.1635	0.2681	0.6723	0.3495	0.4922	0.6671	0.3207	1.0598	1.345	0.6658	0.6988	0.4011	0.5859	1.1874	0.762	0.6907	0.3969	0.6541	0.0916	0.3193	0.3119	1.1075	1.0837	0.2196	0.6629	0.2523	0.1424	0.0357	0.3527	0.3763	1.0222	1.5619	0.5295	0.9452	0
SPECC1P2	0.0486	0	0.2491	0	0	0	0.0886	0.1058	0.1434	0	0	0	0	0	0	0	0	0	0	0	0	0	0	0	0	0	0	0	0	0	0	0	0	0	0	0	0	0	0	0	0.3177	0	0.1968	0	0.1141	0	0.0473	0	0
AL050341.1	0	1.3527	0.0979	0	0.3956	0.1786	0	0	0.0564	0.2853	0	0.2075	0.0335	0.4184	0.0861	0.3658	0.2564	0.1022	0.1619	0.234	0.0703	0.1487	0.1498	0.0865	0.26	0.1481	0.1468	0.1572	0.1162	0.1101	0.1228	0.2185	0.0803	0.0373	0.0456	0.0413	0	0.0385	0.1342	0.2011	0.1249	0.0625	0.8248	0	0	0.1054	0.1486	0.0502	0
ZNF704	6.1433	7.6134	10.4214	18.1297	12.7135	6.528	4.3169	8.6153	6.349	6.2363	6.2101	3.189	4.4584	2.7162	5.9127	4.457	4.874	6.4998	5.4006	3.0233	4.9085	5.3571	10.7328	5.5179	9.727	9.0277	3.3968	10.1288	8.1627	5.5556	4.1582	5.1752	1.8119	1.9683	15.2885	6.5673	5.5436	7.3412	4.5478	3.6559	3.7796	3.8261	4.4489	1.3765	7.5297	7.0797	6.4033	8.8505	1.1712
XPOTP1	0.0499	0.0956	0.0703	0.0291	0.74	0.0544	0.0273	0.0488	0.0441	0.0074	0.0486	0.0181	0.0219	0.0137	0.1685	0.0477	0.0067	0.0133	0.0634	0.0305	0.0184	0.0922	0.0733	0.0282	0.0679	0.3432	0.0192	0.2924	0.0683	0.0575	0.0428	0.0499	0	0.0195	0.0714	0.0647	0.04	0.0553	0.0175	0.0473	0.3422	0.0163	0.0202	0.0066	0.1229	0.0504	0.1358	0.0197	0.0167
GUSBP11	0.1114	0.1643	0.1848	0.0341	0.1554	0.1906	0.1298	0.1172	0.2531	0.2672	0.0814	0.1488	0.2033	0.175	0.3002	0.1623	0.1593	0.188	0.2475	0.7119	0.2251	0.1261	0.1414	0.1716	0.0781	0.2796	0.1941	0.1859	0.15	0.2298	0.1409	0.1828	0.2014	0.2391	0.0806	0.1797	0.1055	0.0847	0.1881	0.1499	0.1283	0.0687	0.2168	0.1577	0.2099	0.1779	0.1118	0.2041	0.0336
AC000067.1	0.7082	0.0615	0.1068	0.0972	0.2397	0	0	0.0907	0.0615	0.1867	0	0.3772	0.1827	0	0.2503	0.057	0	0.0557	0.0588	0.0851	0.1534	0.1622	0	0.5189	0.081	0.3635	0	0.0857	0	0.3603	0.3573	0.1787	0.2189	0.5293	0.7459	0.3155	0	0.5882	0.5853	0.0877	0.5447	0.2046	0.2249	0.0554	0.1955	0.3064	0.4457	0.1096	0
TPD52L2	22.3673	20.941	16.6209	14.7522	14.1435	19.689	9.9954	13.878	17.1317	15.4338	15.3378	15.9065	17.5207	19.9674	19.6868	19.8494	17.2588	14.6562	27.9213	21.9047	15.9798	21.6626	18.0755	14.7524	12.6436	17.8666	17.808	18.9684	17.4221	15.1752	14.6027	16.062	14.1966	19.8781	13.1249	21.0223	16.7105	19.2333	15.8467	31.0002	10.3236	10.0558	13.1932	18.9814	15.9091	26.2214	13.2698	16.4786	6.5095
AC073109.1	0	0	0.0157	0.0428	0.0422	0	0.0446	0	0.018	0.1096	0	0.0111	0	0.0335	0.202	0	0	0.0654	0.0173	0	0.0225	0.0595	0.012	0.0692	0.0119	0.3318	0.0313	0.0377	0.0372	0.0235	0.0131	0.0525	0.0128	0	0.0584	0.0397	0	0.0123	0.0286	0	0.0999	0.02	0.2805	0.0162	0	0	0	0.0322	0
SETBP1	10.6357	32.2228	14.2074	3.6061	12.8523	15.1343	2.2122	19.8768	10.1016	4.3328	4.3516	8.1482	7.1995	15.4128	8.461	20.8926	13.6004	6.3817	29.5911	7.2645	7.8438	13.8953	20.1126	19.1217	24.5712	10.6952	26.3365	15.3728	19.6949	13.419	17.426	9.1597	7.2844	9.6755	13.548	13.2183	8.6935	6.1119	7.5682	14.4495	4.4123	3.9451	9.0106	19.9263	5.6464	11.1354	17.5689	15.44	4.8258
AF111169.3	0.1504	0.7212	0.3533	0.0439	0.173	0.4882	0.2056	0.2046	0.5362	0.1498	0	0.1589	0.1319	0.3947	0.1223	0.2229	0.2355	0.0671	0.3541	0.6782	0.6229	0.2928	0.2089	0.2554	0.2803	0.3766	0.2248	0.4512	0.2479	0.1084	0.1343	0.2509	0.843	0.5389	0.2543	0.3661	0.1408	0.0126	0.1907	0.3167	0.1024	0.0616	0.1522	0.1333	0.2794	0.3457	0.256	0.1978	0
CENPU	5.9561	28.6035	23.8517	4.6635	13.1929	11.1158	21.7257	12.7329	32.1361	13.8513	14.9262	12.8494	15.3048	11.077	31.1567	11.0103	5.8151	17.7625	18.8341	17.8498	13.2222	20.1096	21.3497	14.4001	7.4447	20.7585	17.9636	22.9001	26.5418	18.1917	16.6798	6.3525	3.2043	19.2158	19.8287	12.2618	22.559	11.6419	22.7719	12.5175	20.3472	14.3005	21.3102	15.9713	16.9699	16.3357	15.2184	24.8573	22.7805
DUSP26	4.073	2.1407	4.2859	7.8467	7.5085	1.0894	2.2302	6.1946	3.9799	1.149	12.9562	2.9438	9.6225	6.3827	4.5546	1.9288	3.8948	13.0926	1.5062	0.3331	2.0379	0.5841	2.8673	0.5014	0.6119	8.1729	0.321	2.6673	1.5512	0.9912	0.9307	1.7334	1.6045	0.4385	1.7735	4.2743	0.3835	8.3856	3.9156	1.3682	2.7805	1.7555	2.9409	1.7966	3.1449	0.8679	0.935	4.0308	0.5847
LINC00308	0	0	0	0.0384	0.0378	0	0	0	0	0	0	0.0149	0	0	0.0123	0	0	0	0	0	0	0	0.0322	0.0745	0	0	0	0.0169	0.025	0	0	0	0	0	0	0.0178	0	0	0	0	0	0	0.111	0	0	0.0302	0	0	0.0275
AP001350.1	0.0549	0.4051	0.1609	0.0183	0.0722	0.1589	0.0858	0.0085	0.0463	0.082	0.0656	0.1705	0.0482	0.0322	0.106	0.0859	0.0842	0.0315	0.1219	0.2002	0.0289	0.1604	0.0923	0.0444	0.1602	0.0684	0.1005	0.0888	0.1074	0.1056	0.0252	0.101	0.2639	0.0997	0.103	0.0764	0.0504	0.0237	0.1194	0.0413	0.0385	0.2441	0.1482	0.0417	0	0.0793	0.0992	0.0929	0.0525
KBTBD8	0.005	0.2794	0.1423	0.1503	0.8307	0.0826	1.1826	0.1786	0.0447	0.0867	0.3306	0.1532	0.1683	0.3353	0.0853	0.0725	0.1322	0.7597	0.1177	0.0284	0.2184	0.3293	0.0767	0.1429	0.0982	0.0269	0.097	0.3324	0.1267	0.0388	0.1407	0.1986	0.0318	0.1851	0.0874	0.0738	0.0567	0.5423	0.13	0.1303	0.5776	0.0579	0.2657	0.2886	0.2636	0.1253	0.0786	0.1096	0.7811
OR2G3	0	0	0	0	0.0148	0	0	0	0	0	0.0179	0	0	0	0	0	0	0	0.0363	0	0	0	0	0.0146	0	0	0	0.0661	0	0	0	0.0184	0	0.0126	0	0.0278	0	0	0	0	0	0	0	0	0.0151	0	0	0	0
BEX4	82.5988	108.8362	71.4286	21.4123	84.9637	89.6817	55.3501	60.2518	178.9933	109.4422	82.5499	109.6595	91.8875	173.22	54.1515	56.8353	96.5326	87.2917	139.9106	130.344	159.2391	76.3152	74.5872	83.4412	71.3909	90.8877	121.9793	80.8745	82.0165	92.6976	136.4021	119.4574	110.9574	175.5093	84.1972	76.7612	106.0495	62.9432	121.8799	81.4842	110.633	99.6581	53.8747	179.3914	116.7866	211.3182	89.1058	94.4793	34.6488
NT5M	5.5973	3.6524	1.3048	2.2128	1.3399	1.729	0.7223	1.3535	3.3371	3.2517	2.8627	2.5118	3.1549	2.538	3.0125	2.3769	1.4076	1.9898	2.6269	3.1498	4.1191	1.1334	1.4345	2.4853	1.2983	2.7837	1.9841	2.9856	1.2986	2.338	2.1438	2.1975	6.4786	2.6517	1.9358	5.4424	3.6016	0.9962	1.9773	2.9982	1.674	1.7471	3.3818	1.175	3.4483	1.7491	2.3421	1.4033	0.7138
AC073195.1	1.0498	1.1265	1.1531	0.5091	0.9412	0.8284	2.783	0.5044	1.4884	1.3646	0.7978	2.333	1.6022	1.3067	1.1158	0.8205	0.9333	2.2793	0.6355	4.0087	1.9575	1.3402	1.0558	1.5591	0.5302	2.207	1.8165	1.4165	1.0785	0.8517	0.7015	1.1894	3.6538	3.2778	1.1716	1.6668	1.3349	0.3575	1.7238	1.7514	1.5819	0.7813	2.2998	1.1053	2.3355	1.1156	1.0076	1.7751	0.2736
TPRX1P1	0	0	0	0	0	0	0	0	0	0	0.1044	0	0	0	0.0844	0	0	0	0.1059	0	0	0	0	0.1273	0	0	0	0	0	0	0	0	0	0	0	0	0	0	0	0	0	0	0.7587	0	0.044	0	0	0	0
FLT1P1	0.0181	0	0	0	0	0	0	0	0	0	0	0	0	0	0	0.0248	0	0	0	0	0	0.0176	0	0.0103	0	0	0	0	0	0.0087	0	0.0259	0	0	0	0	0	0.0091	0	0	0	0	0.0733	0	0.0425	0.0083	0	0	0
LRRC30	0.0518	0.3249	5.2456	2.5245	0.4173	1.6752	0.8027	0.296	0	1.045	0.6317	0.5513	0.8293	3.7603	0.0486	3.6856	5.5813	0.4505	1.1711	0.4629	0	0.5547	2.2476	0.0293	0.2645	0.0126	0.3319	0.0267	4.2173	1.1952	0.0555	0	0	0.3671	2.6903	0.1121	0.2911	1.5938	0.3033	2.6189	0.4022	0.0848	0.2273	1.4462	0	0.9052	0.6929	3.6288	0.845
AP001360.2	0.0638	0.0314	0.0273	0	0.0245	0.1657	0.0388	0.0232	0	0.0636	0	0.0963	0	0.1165	0.0479	0	0	0	0.1202	0.152	0.1567	0.1242	0	0.0482	0	0.1237	0.0545	0.0438	0.1295	0.0204	0	0.0304	0	0.2911	0	0	0	0	0.0249	0	0.0348	0	0.2297	0	0.025	0.0978	0.0828	0	0.0712
TUBB4A	28.0635	0.2036	13.9426	2.0088	20.8532	33.3027	0.0314	18.3483	3.8525	39.3252	30.4708	23.2819	43.1606	32.6486	30.4074	32.4642	13.7056	6.6117	1.1208	31.0566	7.0233	4.9858	25.8221	2.0819	14.2017	10.4665	9.8246	0.1774	5.3267	24.0428	37.5966	9.7836	10.554	4.0659	13.7152	53.0221	16.911	16.4559	28.0764	33.9995	7.9603	7.4843	16.9969	2.2282	0.9431	19.31	6.27	22.4485	2.1232
GTF3C6	39.0863	48.9887	39.0009	41.3087	55.3617	31.8462	664.0168	31.1788	51.9086	41.0631	38.5148	51.8864	34.269	54.853	49.9718	30.9775	44.3853	62.7825	59.0262	45.8081	58.7889	56.429	18.5642	65.5212	44.4324	79.4033	44.6478	46.8013	47.3742	46.2868	48.2528	37.9348	32.0103	78.1288	58.9301	37.8635	45.4358	63.3205	61.6585	51.0207	58.4366	54.7335	37.3374	53.1672	47.5309	45.8903	48.4277	43.3133	19.1726
AP001189.4	0	0	0	0	0	0	0	0.0288	0	0	0	0	0	0.0362	0	0	0	0	0	0.054	0	0	0	0	0	0.0256	0	0	0	0	0	0	0.0278	0.0517	0	0	0	0	0	0	0.0432	0	0.0357	0	0	0	0.0257	0	0
STARD3	6.7894	7.3779	6.0574	3.9208	6.1798	5.6357	1.9174	5.6656	5.3977	8.91	4.158	5.3541	4.6273	6.3614	4.6125	5.5372	5.984	4.2799	8.8343	7.1397	5.5195	6.1635	5.3493	7.5352	5.9548	4.5125	6.2193	5.8138	4.8963	6.1886	7.104	4.971	4.1766	5.3241	4.1375	9.3287	5.7689	4.1199	4.4977	7.3027	3.0105	2.6901	4.1402	3.3352	5.9542	6.0208	5.0431	5.5067	0.8991
LELP1	0	0	0	0	0	0	0	0	0	0.1366	0	0	0	0	0	0	0	0	0	0	0	0	0	0	0.0445	0	0	0	0	0	0	0	0	0	0	0	0	0	0	0	0	0	0.0617	0	0	0	0	0	0
TRABD	6.6287	8.9857	9.6557	3.9517	5.3185	7.2497	15.5994	6.9695	4.0559	10.5254	6.5776	9.9674	11.0714	5.3949	7.7336	4.8655	10.9942	8.8961	5.9619	15.1727	9.9264	8.8615	9.5126	12.3832	6.3309	8.2487	10.2849	10.7979	7.5919	8.8742	9.4186	8.8945	9.6289	5.0403	7.3324	12.4523	13.6106	8.2034	9.172	9.0642	6.2902	5.0233	9.9792	8.1746	10.8567	11.0005	8.9465	9.0569	0.964
VSTM4	6.9763	1.036	5.0191	5.125	7.0544	2.5615	0.4165	6.405	1.0216	3.8587	3.0564	2.1569	1.3373	1.4944	2.0321	0.5589	1.3069	4.1938	1.4888	0.1428	3.0976	1.0056	4.5618	1.9446	1.1312	1.658	0.2999	2.0274	4.4415	4.298	0.9531	5.4096	2.1354	0.3425	1.9771	1.951	0.6447	4.3537	2.056	0.3135	1.8537	0.9661	2.1606	0.5504	0.8044	1.3396	2.0917	2.714	0.2085
OR7E99P	0	0.0383	0.0332	0	0.0149	0.101	0	0.0141	0	0.1162	0	0.0117	0	0	0	0	0	0.0694	0.4213	0	0.0477	0	0	0.0147	0.1009	0.0629	0.0166	0	0.0789	0	0	0	0	0.0253	0.1238	0.014	0.0416	0.0131	0	0	0	0	0.0525	0.1551	0	0.0596	0.1261	0.0341	0.1084
PRIM1	2.8898	11.9876	5.7779	2.5191	6.4803	4.7013	6.4473	5.2159	10.9149	7.3513	7.8129	6.9254	5.7314	3.238	12.102	12.1939	3.398	2.1523	8.0809	3.9622	4.3171	8.3278	7.4066	7.7274	6.464	11.2001	6.1222	7.7725	6.5458	5.5498	4.6966	3.8102	1.2736	1.9228	11.4251	7.2353	12.1203	6.7442	6.1287	5.719	11.1932	5.1495	8.773	3.019	6.7469	5.5712	14.0846	5.3427	7.1718
LINC01613	0	0	0.0055	0	0	0	0	0.0047	0	0	0	0	0	0	0	0	0	0	0.0061	0	0	0	0.0042	0	0	0.0083	0	0	0	0.0041	0	0	0	0	0.0103	0	0	0	0	0.0045	0	0	0.0058	0	0	0	0	0.0057	0
AP003068.1	0.4396	0.2919	0.338	0.1026	0.177	0.2397	0.2804	0.0717	0.4215	0.2627	0.5512	0.3781	0.1735	0.1806	0.4621	0.0601	0.118	0.5585	0.0931	0.2917	0.526	0.2353	0.1077	0.0249	0.1069	0.6179	0.1408	0.4748	0.1337	0.3168	0.1414	0.1572	0.3465	0.4941	0.1312	0.1902	0.1058	0.3103	0.5661	0.0231	0.0718	0.144	0.6525	0.4966	0.3095	0.1617	0.2137	0.2602	0.0735
RNU7-90P	0	0.2845	0.2471	0	0.2219	0.3005	0.3515	0	0.569	0.2881	0.2687	0.6984	0.1691	0	0.724	0.2638	0.5177	0.5159	0.2724	1.1813	0	0.3754	0.3781	0	0.1875	0.7477	0.2471	0.1984	0	0.1853	0	0.5516	0.608	0.1885	0.2302	0.4173	0	0	0	0.2031	0	0.6315	0.2603	0	0	0	0.7502	0.2536	0
UBE2V1P10	0	0	0	0	0.0511	0.0693	0	0	0	0	0	0	0	0.1217	0	0	0	0	0.1256	0.0454	0	0.1298	0.2179	0.0503	0.0432	0	0	0	0.0676	0	0	0	0	0	0.0531	0	0	0	0	0.0936	0	0	0	0.0591	0	0.0409	0	0.0585	0
AC022730.1	0.0211	0	0.027	0.0491	0	0.0328	0.0384	0	0	0	0	0	0.0369	0.0288	0	0	0	0.0282	0	0	0	0	0	0	0	0	0	0.0866	0	0	0	0	0.0221	0.0206	0.0251	0.0228	0	0.0212	0	0	0	0.0345	0.1704	0	0	0	0.0614	0	0.0704
AC133485.1	0	0	0	0	0	0	0	0	0	0	0	0	0	0	0	0	0	0	0	0	0	0	0	0.1092	0	0	0	0.0992	0	0	0	0	0	0	0	0	0	0	0	0	0	0	0	0	0	0	0	0	0
AC099654.1	0	0	0	0	0	0	0	0	0	0	0	0	0	0	0.0108	0	0	0	0	0	0	0	0	0	0	0	0	0.0295	0	0	0	0	0	0	0	0	0	0	0	0.0151	0	0	0.4251	0	0	0	0	0	0
OR4G4P	0	0	0	0	0	0.0222	0	0	0	0	0	0	0	0	0	0	0	0.019	0	0	0	0	0	0	0	0	0	0	0	0	0.0153	0	0	0	0	0	0	0	0	0	0	0	0	0	0	0	0	0	0
AC087392.5	0.8558	0.8298	1.0027	0.1427	0.5626	0.6095	0	1.1973	1.01	0.9132	0.7154	0.9962	0.5575	0.837	0.7711	0.1672	0.5907	1.1446	0.449	0.8488	0.7652	0.6425	0.7191	0.8029	0.4993	1.0429	0.8458	0.7294	0.6695	0.8225	0.4718	1.0491	1.5419	0.6452	0.6712	1.0317	0.5887	0.3206	1.0019	1.2873	0.5195	0.3203	0.429	0.6174	1.205	0.5171	0.8322	1.1898	0.1227
AC024587.2	0.0353	0.191	0.0302	0.0137	0.0677	0.1284	0	0.0512	0.1736	0.0879	0.2131	0.1172	0	0.3706	0.053	0.2093	0.1106	0	0.0831	0.2163	0.0433	0.1718	0.1038	0.0666	0.1831	0.0684	0.0151	0.1937	0.0895	0.0565	0.0631	0.0168	0.1484	0.069	0.0983	0.0764	0.0378	0.1187	0.0276	0.0744	0.1539	0.0963	0.4606	0.1095	0.069	0.1082	0.1602	0.0155	0.1575
PARP1P1	0	0.0058	0.0152	0.0323	0.0045	0.0246	0	0.0043	0	0.0236	0.0165	0.0036	0.0069	0	0	0.0054	0	0.0053	0.0056	0.0081	0.0073	0.0154	0.0155	0.0268	0.0269	0.0115	0.0101	0.0244	0	0.019	0.0085	0.0057	0.0042	0.0039	0.0189	0.0171	0.0254	0	0.0139	0.0208	0.0065	0.0065	0.0053	0.0053	0.0093	0.0254	0.0307	0.0156	0
AC084026.3	0	0	0	0	0	0	0	0	0	0	0	0	0	0	0	0	0	0	0	0	0	0	0	0.0285	0	0	0	0.0086	0.0128	0.0081	0	0	0	0	0.01	0.0091	0	0	0	0	0	0.0137	0.0339	0	0	0	0	0	0
AC002069.1	0.0103	0.0152	0	0.0722	0	0	0	0	0	0	0	0	0	0	0	0	0	0	0	0	0	0	0	0	0	0	0	0	0	0	0	0	0	0	0	0	0	0	0	0	0	0	0.0139	0	0	0	0	0	0
RPL17P35	0.196	0.1285	0.0837	0.2541	0.3508	0.2375	0.0397	0.0237	0.1928	0.1627	0	0.0592	0	0.328	0.1962	0.0894	0.0585	0.1456	0.2153	0.0889	0	0	0.064	0.148	0.0212	0.1478	0.0558	0.3585	0	0.1256	0	0.0311	0.1373	0.3618	0.052	0.0943	0	0.0879	0.153	0.0459	0.1424	0.0357	0.0882	0.2316	0.1022	0.0601	0.1694	0.0286	0
AL596223.2	0	0.0813	0	0.0643	0	0	0	0	0	0	0	0	0	0	0	0	0	0	0	0	0.4564	0.0268	0	0.156	0.0804	0	0.0353	0	0	0	0	0.1182	0.7239	0.1615	0.0986	0	0	0	0	0	0	0	0.0744	0	0	0.0507	0	0	0
ARHGAP27P2	0.0884	0.1566	0	0.2064	0.0814	0	0	0.2117	0.0522	0.1057	0.1725	0.016	0.031	0.0484	0.0133	0.0726	0.095	0.0237	0.1249	0.0181	0.1302	0.0344	0.104	0.0601	0.0344	0.0171	0.0227	0	0.0269	0.017	0.0569	0.1012	0	0.0864	0.0422	0.0383	0.0284	0.1249	0	0.1117	0	0	0	0	0	0.0488	0.0344	0.0465	0
AC092447.10	0.0072	0	0	0	0.0167	0	0.0264	0	0.0107	0	0	0	0	0	0	0	0	0.0194	0	0	0	0	0	0	0	0	0	0.0074	0	0	0	0	0	0	0	0.0078	0	0	0	0	0	0	0	0	0	0	0	0	0
LINC02059	0	0	0	0	0.0197	0	0	0	0.0084	0	0	0	0	0	0.0043	0	0	0	0.0081	0	0	0	0	0	0	0	0.0073	0	0	0	0	0	0	0	0	0.0062	0	0	0	0	0	0	0.0154	0	0	0	0	0	0
LINC01056	0	0	0	0	0	0	0	0	0	0	0.027	0	0	0	0	0	0.013	0	0	0	0	0	0	0.011	0.0094	0	0	0.0299	0	0.0093	0	0.0277	0	0	0	0.0105	0	0	0	0	0	0	0.0131	0	0	0	0	0	0
AL133520.1	2.9379	1.1845	1.9699	1.8138	2.7513	2.3952	0.5915	1.3754	4.0318	5.1288	4.1883	2.0414	1.4231	2.2686	4.9507	1.4018	0.9171	2.7643	1.0375	1.7788	3.3958	2.7596	1.7246	1.7213	1.4947	2.2352	3.0636	2.4775	1.3512	1.7236	1.4648	2.2719	2.8184	1.2687	1.7737	2.7166	1.2886	1.3609	2.4996	2.3202	1.2003	1.1747	1.8902	1.7707	2.5854	2.3086	2.6411	3.3471	0.7428
HNRNPMP2	0	0	0	0.0466	0.023	0.0311	0	0	0	0	0.0834	0	0	0	0	0	0	0.1068	0	0	0	0	0	0	0	0	0	0.0205	0	0	0	0	0.021	0	0	0.0216	0	0	0	0	0	0	0.0808	0	0	0	0	0	0
AC027644.3	5.1519	1.9953	1.3754	4.5841	0.9879	1.4047	1.7215	1.8219	3.3251	5.9966	3.3495	3.0514	2.4662	2.6453	3.7395	2.5545	2.5067	8.0963	2.4561	3.9668	4.5047	1.6296	1.9149	2.3819	1.3149	3.8703	3.5201	2.0757	1.2083	1.7329	1.5647	2.0569	10.0394	5.4336	2.8183	2.5083	2.2397	2.0566	4.1717	2.1925	2.8766	4.3936	4.9247	3.3949	2.9469	1.8355	2.171	2.5691	1.5438
HAVCR2	0.5218	0.3061	0.6324	1.7569	1.6274	0.3477	1.203	0.4344	0.5564	0.7607	0.7094	0.572	0.4604	0.4519	0.3399	0.4041	1.0041	0.9375	0.2797	0.2375	1.5448	2.9245	0.5115	1.4093	0.2781	0.7038	0.7691	0.6305	0.5881	0.4078	2.3013	1.3081	0.7697	0.7188	0.4052	1.0882	0.3935	1.772	0.4121	0.0794	2.3783	0.9161	0.5048	0.3425	0.6491	0.2803	0.4829	0.9136	1.0304
AC016632.1	0	0	0	0	0	0	0	0	0	0	0	0	0	0	0	0	0	0	0	0	0	0	0	0	0	0	0	0	0	0	0	0	0	0	0	0.066	0	0	0	0	0	0	0.3293	0	0	0	0	0	0
AL355598.1	0	0	0	0	0	0	0	0	0	0	0	0	0	0	0	0	0	0.5542	0	0	0	0	0	0	0	0	0	0.0609	0	0	0	0	0	0	0	0	0	0	0	0	0	0.0969	3.2751	0	0	0	0	0	0
RF00019	0	0.9536	0.4141	0.1257	0.2479	0.1678	0	0.1172	0.1589	0.1609	0	0.0975	0.2834	0.4425	0.0809	0	0.4337	0.7203	0.4565	0.2199	0.9914	0	0.1056	0.122	0.4189	0.1044	0	0.3324	0	0.207	0.1155	0.3081	0	0.1053	0.2571	0.2331	0.1729	0	0.3783	0.1134	0.176	0.5291	0.2907	0	0	0	0.1048	0.425	0
CLUH	4.7862	4.3183	6.5195	7.3888	7.3448	6.8254	0.7359	6.7353	5.0156	4.8873	5.3957	3.5646	4.5121	5.8866	3.8319	3.892	6.2822	4.0443	5.0375	5.5003	5.2026	5.6347	6.0251	3.8927	6.9147	3.1125	4.0693	5.649	4.9718	5.9586	5.8438	8.1288	4.0376	2.2947	4.2917	9.1717	6.7869	4.3113	4.0999	7.2383	1.4896	0.959	4.366	2.1072	4.0949	6.663	4.683	5.1527	0.2608
RBM27	4.3933	7.7345	6.6943	4.6749	3.1934	8.3914	13.4105	4.8537	9.0876	9.7318	7.6782	9.5174	5.7579	10.7741	7.7946	6.074	6.3457	7.7916	12.9072	7.603	9.2917	6.0821	6.9865	5.7092	6.2635	8.8661	10.7329	6.6379	7.7757	7.5954	7.108	7.0944	12.6445	13.54	7.845	6.2656	7.5363	6.1153	9.5865	4.9246	8.6917	8.8811	6.9763	11.6993	6.5944	6.9407	7.3162	9.0888	8.2871
ASH2LP1	0	0	0	0	0.0419	0	0	0	0	0	0.0169	0	0	0	0.0091	0	0	0	0.0171	0	0	0	0.0119	0	0	0	0	0	0	0	0.013	0	0	0	0	0	0	0	0	0	0	0	0	0	0	0	0	0	0
SOS2	4.6669	10.2216	13.1531	4.4625	13.1995	12.8026	15.8965	9.6538	10.9398	5.3188	4.7227	7.8096	6.3751	9.0352	6.9981	4.9998	6.6595	7.7331	8.1599	10.5198	16.566	10.2079	13.1584	9.4599	13.5711	7.0429	15.7552	11.5658	10.8984	14.4357	12.5565	20.6668	7.5202	8.7615	12.4671	10.8555	9.1176	4.2599	10.1261	8.4472	8.297	8.2877	8.9469	5.4877	10.3328	12.7919	11.0442	16.4433	2.3491
AC145285.2	0.6883	0.4583	0.4293	0.3127	0.2593	0.6548	0.1665	0.2784	0.6829	0.7006	0.5092	0.9817	0.6784	1.0342	0.4894	0.7248	0.3761	0.8309	0.2839	1.7039	1.7715	1.0552	0.6807	0.8966	0.3613	1.0155	1.0222	0.5577	0.315	0.5385	0.2808	1.4199	0.3649	0.2857	0.5162	1.4432	0.4595	0.1659	0.7844	0.4105	0.2688	0.359	0.6329	0.6881	0.8076	0.504	0.3021	0.5848	0.163
AC016876.3	0.7578	0.8696	0.6834	0.4913	0.549	0.3936	0.3581	0.7024	1.2422	1.0482	0.743	0.7624	0.8369	0.538	1.0959	0.0768	0.6028	2.4025	0.3568	1.5187	0.93	0.3278	1.9535	0.286	0.3275	1.1427	1.0787	1.5303	0.2135	0.4316	0.4212	0.6824	0.472	0.9052	0.3685	1.3362	1.4867	0.0566	1.1829	0.1182	0.1376	0.4136	0.7575	0.5968	1.7125	0.5677	0.2729	0.6644	0.0469
CRACR2A	0.2177	0.2123	0.3441	0.0269	0.2141	0.3691	0.0699	0.214	0.0764	0.1619	0.0214	0.1346	0.217	0.0827	0.134	0.164	0.2034	0.3015	0.1517	0.2017	0.1483	0.3314	0.1683	0.4181	0.1623	0.1376	0.2298	0.3246	0.1488	0.4037	0.1193	0.0947	0.0222	0.1856	0.269	0.1339	0.3649	0.1393	0.1864	0.0697	0.0408	0.0298	0.3378	0.102	0.1013	0.2222	0.3311	0.2043	0.0112
AL160236.2	0	0	0	0	0	0	0	0	0	0	0	0	0	0	0.0449	0	0	0	0	0	0	0	0	0.0677	0	0	0	0	0	0	0	0	0	0	0	0	0	0	0	0	0	0	0	0	0	0	0	0	0
AL391058.1	0.0349	0.3086	0.1638	0.0407	0.1604	0.1086	0.0212	0.1897	0.0343	0.0347	0.1133	0.1473	0.0611	0.1273	0.0436	0.0795	0.0624	0.1554	0.1641	0.083	0.2567	0.2262	0.2164	0.171	0.0904	0.0901	0.1489	0.5857	0.1591	0.1898	0.1246	0.2493	0.0977	0.1022	0.1526	0.2263	0.2052	0.082	0.1088	0.2202	0.057	0.0571	0.1725	0.0772	0.1227	0.3312	0.3503	0.2904	0.0194
SNORD116-29	0.1441	0	0.3692	0.3362	0.1657	0.2244	1.0502	0	0	0	0	0.1304	0	0	0	0	0.3867	0.9634	0	0.1471	0	0	0.4236	0	0.1401	0	0	0.1482	0.2191	0	0.7721	0	0	0	0	0	0	0	0	0	0	0	0.1944	0	0	0	0	0.3789	0
AC005479.1	0.2842	1.198	0.3642	0.2369	0.1168	0.2847	0.296	0.486	0.2995	0.3336	0	0.5146	0.1068	0.0556	0.1677	0.9996	0.2997	0.0543	0.4588	0.4145	0.1868	0.8496	0.5572	0.3448	0.6119	0.3936	0.4161	0.2088	0.0926	0.5463	0.5005	0.4645	0.1493	0.0992	0.315	0.3294	0.3584	0.1433	0.2377	0.342	0.3981	0.133	0.3835	0.4047	0.1905	0.168	0.2566	0.534	0
AC040174.2	0	0	0.033	0.24	0.3846	0.1202	0.9842	0.056	0.0379	0.0768	0.3941	0.0931	0	0.2112	0.0193	0	0.1381	0	0	0	0	0.025	0.2269	0.0582	0.5	0.0748	0	0.3174	0.1956	0.173	0	0	0	0.0251	0	0.306	0	0	0.9332	0.0812	0.1681	0.2947	0.0694	0.7518	0.5732	0	0	0.0338	0.5161
HEATR6	3.3453	6.3346	6.4995	3.4251	6.0842	12.093	2.3234	5.7622	5.1055	3.9811	3.1824	4.5789	7.2679	7.4694	2.5248	8.6309	6.9462	2.9237	9.0901	6.5073	4.8378	7.009	8.7472	5.512	7.561	4.3546	8.1877	7.9514	5.7243	6.4914	8.9361	6.6743	3.157	6.6636	5.9453	8.9316	6.2884	2.7991	4.8365	10.0942	2.7295	2.6141	4.4913	3.8355	6.9397	7.2108	6.0144	6.7448	0.7559
ANKLE2	3.8573	9.6218	7.1269	2.4867	3.0895	4.8602	1.7106	3.6052	9.1301	6.2587	5.9825	5.2902	3.4972	4.1796	8.0231	3.3546	3.9844	3.3532	7.8378	4.6558	4.5711	7.0372	4.3204	5.495	6.3481	7.1213	4.9871	4.2797	4.9656	7.2349	4.6199	4.8596	3.8006	4.6856	4.9762	6.781	3.9005	2.5381	4.4158	6.3593	2.4329	2.3918	6.1477	4.6274	3.6416	3.9952	7.7921	5.1563	1.1781
AC023824.5	0	0	0	0	0.0391	0	0	0	0	0	0.0237	0	0	0	0	0	0	0	0	0	0	0	0	0	0	0	0.0218	0	0	0	0.0182	0	0	0	0	0.0184	0	0	0	0	0	0	0.1377	0	0	0	0	0	0
AL109924.2	0.0256	0.0189	0.0656	0.1046	0.0589	0.0598	0.07	0	0	0.0191	0.0535	0	0	0	0.0288	0.0175	0	0.0856	0	0.0523	0.0236	0.0748	0.0125	0	0.0871	0.0124	0	0.0132	0.0195	0	0	0	0	0	0	0.0139	0	0	0.015	0	0	0.1467	0	0	0	0.0118	0	0	0
AC007557.2	0.0205	0	0	0	0	0	0	0	0	0	0	0	0	0	0	0	0	0	0	0	0.0378	0	0	0	0.0399	0	0	0	0	0	0	0	0	0	0	0	0	0	0	0	0	0	0	0	0	0	0	0.027	0
DEPP1	56.629	10.4758	11.3563	29.7741	4.2992	19.7049	4.733	6.7957	5.4711	24.1331	6.5816	20.6667	7.7299	7.9687	7.8056	15.3501	12.7138	10.5161	11.5545	5.7081	3.8789	9.5002	5.6066	20.5686	1.5532	17.0524	3.2909	4.2279	13.7748	27.1748	10.726	7.7379	8.3648	3.2361	9.9739	23.315	3.3179	20.162	14.3878	2.6879	9.7142	4.0352	9.4355	3.4406	3.4002	7.0079	5.3551	6.3026	3.5242
RNU6-783P	0	0	0	0	0	0	0.2075	0	0	0	0.1586	0	0	0	0	0	0.1528	0	0	0	0	0	0	0	0	0	0.1459	0.1171	0	0	0	0	0	0	0	0	0	0	0	0.2398	0	0	0.922	0	0	0	0	0	0
CABP4	0.0505	0.0839	0.0648	0.0258	0.0509	0.0394	0.0576	0.0825	0.0093	0.033	0.0132	0.02	0.0222	0.0562	0.0119	0.0389	0.0297	0.2619	0.0312	0.0451	0.1163	0.1445	0.0495	0.0715	0.0921	0.0673	0.0243	0.0682	0.0288	0.0395	0.0305	0.0949	0.0564	0.0432	0.0302	0.0376	0.0253	0.0446	0.0518	0.0333	0.0206	0.0207	0.277	0.1595	0.1556	0.0523	0.0522	0.0623	0
GZMA	1.8055	0.592	0.9083	0.4058	1.4157	2.4172	0.8532	0.1164	0.6708	0.6793	1.5279	0.666	0.3402	0.4395	0.1506	0.3842	0.5565	2.2717	0.2645	1.106	2.585	1.1715	0.6031	0.4543	0.3901	0.1556	16.5175	0.5778	1.0376	1.2982	1.491	1.7024	3.9217	3.0194	0.1437	0.6078	2.1897	0.8498	0.3601	0.0422	1.7267	3.6353	0.2527	0.2844	1.428	0.6271	0.2471	1.0378	1.9908
AC008825.2	0	0	0	0.0194	0.0192	0	0	0	0	0	0	0	0	0	0	0	0	0.0445	0	0	0	0	0	0	0	0	0	0	0	0	0	0	0	0	0	0	0	0	0	0	0	0	0	0	0	0	0	0	0
HOXC6	1.7293	4.0066	5.2544	2.7629	23.1259	11.5249	11.1608	3.4805	19.4876	53.7914	22.8365	15.2233	30.7177	69.135	7.7733	29.6419	28.0531	20.2425	47.739	21.8383	26.6044	4.1781	1.6488	12.062	14.3876	5.8049	27.6028	49.4457	22.9371	26.176	77.5534	11.7915	11.2564	56.1756	29.8322	12.3992	4.8957	15.6963	28.1379	49.2503	18.0993	1.0176	1.7594	67.7415	37.2605	7.1209	14.8102	29.8017	0.6157
ACVR1B	7.0816	15.3407	13.251	4.122	14.1362	10.454	6.8785	10.0219	19.1022	12.525	15.9729	14.5548	8.0774	12.8066	17.4257	10.0974	13.5834	12.0738	23.4405	8.9075	8.7072	11.7883	13.1153	13.6904	12.0343	17.3158	13.9236	9.7512	15.811	8.5344	10.222	9.8755	9.1983	9.9028	17.1429	15.2713	8.5067	10.2909	10.01	13.2294	6.6862	4.848	9.9735	11.9808	12.6854	8.6093	17.2879	11.2616	2.3828
SEC23B	11.1811	8.4122	11.7939	6.7017	13.8894	14.243	11.3897	9.6314	10.6646	12.7538	9.2137	11.1286	9.8967	11.1548	12.2966	18.8086	10.299	8.7659	16.0992	11.2732	11.4817	19.2548	14.7416	11.4433	15.8942	8.6057	14.1955	11.9678	10.6641	14.2278	14.9589	16.7277	6.7887	9.0613	11.4444	14.3873	13.7041	5.0156	10.6014	24.5285	13.3185	11.1873	12.4643	10.1111	11.0733	16.2194	12.5803	10.2237	6.169
AC009949.1	0.0131	0.0386	0.0084	0	0.0376	0.0102	0	0.0142	0.0096	0	0	0	0	0	0	0	0	0.0175	0	0.0734	0.012	0.0699	0.0064	0.1258	0.0381	0.0063	0.0251	0.0067	0.0099	0.0126	0.007	0.1589	0	0.0064	0.0468	0.0283	0.042	0	0	0.0069	0	0	0	0	0	0.012	0	0	0
ARHGEF25	5.8367	9.5433	6.4428	2.5372	2.4976	4.3981	2.4137	4.65	6.113	6.1034	2.5822	4.1782	4.6129	6.0242	6.902	7.6662	3.2161	4.6473	5.5254	3.767	3.5688	3.2622	5.9591	3.0995	2.1174	9.2211	3.7825	6.2464	3.91	3.2869	3.3186	3.383	3.5944	4.3666	6.718	7.2493	2.5312	2.5232	5.7661	3.2814	1.7236	1.6208	5.721	2.4723	5.751	2.8621	4.7499	4.0894	0.5709
RABEPKP1	0	0.0172	0	0	0	0	0	0	0	0	0	0	0	0	0	0	0	0	0	0.0119	0	0	0.0114	0.0264	0	0.0113	0	0.024	0	0	0	0	0	0	0	0	0	0	0	0	0	0.0191	0	0	0	0	0	0	0
AC093019.1	0	0.56	0.2432	0.2768	0.0546	0	0	0.1033	0	0	0	0.2578	0.1248	0	0.0356	0	0	0.1269	0.4021	0.2422	0	0.3232	0.2326	0.2686	0.1845	0.046	0.0608	0.1952	0.1444	0.1368	0	0.0679	0	0.0464	0.1133	0.0513	0.1523	0.0479	0.1111	0.1499	0	0.0777	0.1281	0.1892	0.0557	0.1309	0.2307	0.1248	0.6348
AC068768.1	1.4844	2.5919	3.909	0.3496	1.9977	2.143	0.5212	1.2447	2.5213	1.5156	1.9921	2.3982	1.2958	2.2469	2.3774	0.8103	1.773	1.3023	1.8178	2.5791	1.6796	2.1935	3.9047	2.0508	2.2642	3.9338	1.5964	2.8928	2.7968	2.4932	3.0802	1.8016	0.5224	0.7586	2.6413	2.1291	1.4208	1.8747	1.9689	2.3445	1.0126	0.6801	1.7275	1.5565	2.5006	1.8656	2.9929	2.1492	0.4327
AC244636.2	0.043	0.0528	0.0275	0.0251	0.0247	0.0223	1.6582	0.0078	0.0317	0.0642	0.1397	0	0.0251	0.0294	0.0323	0.0098	0.0481	0.0958	0.0101	0.0146	0.0264	0.0139	0.0211	0.0568	0.0139	0.0417	0.0184	0.0663	0.0218	0.0069	0.0154	0.0102	0.0678	0.035	0.0086	0.0233	0.0115	0.0072	0.0419	0.0226	0.0351	0.0235	0.8024	0.0381	0.0252	0.0198	0.0139	0	0
LINC01359	0.0691	0.0489	0.1098	0.0387	0.07	0.0775	0.3022	0.0541	0.0979	0.0826	0.0924	0.1276	0.0727	0.2157	0.0996	0.0454	0.1484	0.1811	0.1132	0.2173	0.2493	0.0323	0.0921	0.0782	0.0107	0.0857	0.039	0.0825	0.1009	0.0558	0.0681	0.0988	0.488	0.2944	0.1287	0.0269	0.0266	0.0111	0.0744	0.0698	0.0813	0.1086	0.4028	0.0331	0.0454	0.0635	0.0538	0.0691	0.0231
LINC01871	1.673	0.2178	0.5675	0.4019	0.4529	0.3833	0.0897	0.5354	0.0726	0.147	0.5484	0.9356	0.8199	0.4716	0.2586	0.4038	0.3302	2.5007	0.2085	0.4019	0.7246	0.1916	0.1929	0	0.3349	1.097	0	0.1518	0.4491	0.331	0.2637	0.4222	2.4305	1.2984	0.1175	0.0532	0.3159	0.3474	0.4032	0	0.3216	2.3364	0.7968	0	0	0.0452	0.2392	0.2588	0.2469
PDZD11	46.8485	21.7191	20.3704	18.2997	27.3058	15.4197	42.9429	20.9774	26.1483	32.4918	30.0992	26.7962	22.7186	31.4855	27.1658	14.3941	26.279	39.1123	19.4841	25.2292	33.5281	16.0144	19.327	19.5832	13.4951	32.1077	20.7063	24.8997	22.1589	22.9571	25.5327	21.5442	28.7408	61.9501	17.949	25.8728	19.3302	34.8247	30.6283	13.069	46.8509	46.0704	28.7847	29.2145	32.6005	37.0606	14.2818	21.1207	36.0611
RN7SL356P	0	0	0	0	0	0	0	0	0	0	0	0	0	0	0	0	0	0	0.0681	0	0	0.0938	0.0473	0	0	0	0	0	0	0	0	0	0.152	0	0	0	0	0	0.0564	0	0	0	0	0	0	0	0	0	0
STT3B	31.2517	42.4311	48.735	27.0534	58.7374	44.949	52.2759	45.8377	49.292	44.6752	39.2686	41.0263	40.7183	35.4509	35.0842	40.8217	35.7889	41.8009	43.0089	38.8596	53.6454	32.3732	58.04	35.0636	47.7714	43.4673	38.6803	41.2626	55.2213	47.4631	55.3696	71.697	21.7176	33.8251	41.9135	55.3591	48.3792	51.0508	46.3558	38.2121	57.7426	47.7336	40.7641	35.2402	62.1992	51.4513	44.2896	44.5987	31.8232
LIN28AP2	0	0	0	0	0	0	0	0	0	0	0	0	0	0	0	0	0	0	0	0	0	0	0	0.0296	0	0	0	0	0	0	0	0	0	0.0255	0	0	0	0	0	0	0	0	0	0	0	0	0	0	0
RN7SKP259	0	0.053	0	0	0.0413	0.1678	0	0	0.1059	0.0536	0	0.0975	0.0315	0	0.1078	0	0	0.1921	0	0.1466	0	0	0.0704	0	0	0	0	0	0	0	0	0	0.0377	0	0	0	0	0	0	0	0	0	0.0969	0	0	0.033	0	0.0944	0
AC147055.1	0.0159	0	0.3677	0	0.1834	0	0	0.0173	0.3763	0.0953	0.1111	0.0577	0	0	0.0359	0	0.1926	6.0129	0	0	0	0	0.0156	0.0181	0	0.4481	0	0.2132	0.485	0.0613	0.0513	0.7524	0	0	0	0.0345	0	0	0.056	0	0.8858	3.028	0.0861	0	0.0561	0.0293	0	0.8177	5.7325
SNRPFP2	0.3335	1.0543	0.3052	0	0.8769	0.3711	0	0.1555	0.7027	0.0712	0.2655	0.6038	0.2089	0.7175	0.93	0.2606	0.1279	0	0.6729	1.3617	0.5261	0.0927	0.4203	0.1079	1.2969	0.5079	0.1221	0.245	0.0725	0.1373	0.6128	0.2044	0.2003	0.2793	0.398	0.8246	0.3059	0.2402	0.0558	0.8527	0	0.39	0.5786	0.6331	0.2236	0.5694	0.2316	0.6891	0
AC080128.1	0	0.0184	0	0.0073	0.0072	0	0	0	0	0	0.0087	0	0	0	0	0	0.0167	0	0.0088	0.0127	0.0115	0	0.0061	0.0141	0.0061	0	0	0.0128	0	0	0	0	0	0	0	0	0	0.0063	0	0	0	0	0.0758	0	0	0	0	0	0
LINC01688	0	0	0	0	0	0	0	0	0	0	0	0	0	0	0	0	0	0	0	0	0	0	0	0	0	0	0	0	0	0	0	0	0	0	0	0	0	0	0	0	0	0	0	0	0	0	0	0	0
RF00614	0	0	0	0	0	0	0	0	0	0	0	0	0	0	0	0	0	0	0	0	0	0	0	0	0	0	0	0	0	0	0	0	0	0	0	0	0	0	0	0	0	0	0	0	0	0	0	0	0
LINC01486	0.1336	0	0	0	0.0769	0	0.0304	0	0.0246	0	0.0698	0	0	0.0229	0.0125	0	0.0224	0.0447	0	0	0	0	0	0.0567	0.0162	0.0162	0	0.0344	0.0508	0	0	0	0	0.0163	0	0.0361	0	0.0168	0.0195	0.0176	0	0.082	0.924	0	0.0392	0	0	0	0
AL603910.1	2.5852	5.9599	0.7454	10.7473	4.5731	2.3664	0.2945	1.9692	5.0057	1.9792	0.9905	1.6385	1.8705	1.5044	1.5287	5.6579	0.8675	2.7661	7.0297	3.2332	1.6656	7.0451	0.7603	2.049	2.7964	2.0987	1.7388	1.7286	1.6223	0.7764	1.5588	2.5419	2.3095	1.737	0.9643	4.4054	1.193	0.8799	1.5889	2.9263	0.845	4.6034	2.5294	0.1718	2.0096	2.7335	1.477	1.53	1.4593
MIR7856	0	0.63	0.2736	0	0	0	0	0	0	0	0	0	0	0.2923	0	0.292	0.2866	0	0	0.218	1.5721	0.6234	0.6279	0.4835	1.038	0	0	0.6589	0.6496	0.6156	0	1.5268	0	0	0	0.462	0	0	0	0.8993	0	0	0	0	0	0.1963	0	0.8424	0
AC110602.1	0.0376	0.111	0.0482	0.0878	0.1298	0.0586	0.2056	0.1227	0.1664	0.1123	0.3143	0.0681	0.033	0.2059	0.0282	0	0.1514	0.4023	0.1593	0.1919	0.2076	0.0732	0.0737	0	0.0731	0.0729	0.0963	0.116	0.2288	0.1445	0.0806	0.2151	0.3161	0.0735	0.0898	0.122	0	0	0.044	0.0792	0.1843	0.6157	0.4059	0.05	0.2206	0.1729	0.0731	0.1483	0.1258
AC087258.2	0	0	0	0	0.3821	0	0	0	0	0	0	0	0	0	0	0	0	0	0	0	0	0	0	0	0	0	0	0	0	0	0	0	0	0	0	0	0	0	0	0	0	0	0.4482	0	0	0	0	0	0
AC006482.1	0	0	0	0	0	0	0	0	0	0	0	0	0	0	0	0	0	0	0	0	0	0	0	0	0	0	0	0.0451	0	0	0	0	0	0	0	0	0	0	0	0	0	0	0	0	0	0	0	0	0
AC008627.1	0	0	0.009	0	0.0161	0	0	0	0	0	0	0.0064	0	0	0	0	0.0094	0	0.0099	0	0	0	0	0.0318	0	0	0	0.0361	0	0.027	0	0	0	0.0274	0	0	0	0	0	0.0074	0	0	0.3314	0	0.0165	0	0.0068	0	0
PROK2	0.4821	0.1094	0.019	0.3289	0.2731	0	1.5141	0.113	0	0.0222	0.1137	0.0336	0.052	0.0508	0.0501	0.1015	0.1692	0.0298	0.0105	0.0076	0	0	0	0.0588	0	0.115	0.0095	0.3052	0.0226	0	0	0	0	0	0.0089	0.0161	0	0.5685	0.0434	0	0.1455	0.1093	0.1001	0.0591	0.148	0.0341	0.0072	0	0.0992
CCDC82	4.3114	5.689	5.0394	3.0451	8.0371	5.0394	15.0891	4.8224	6.0153	3.807	2.8379	3.4753	4.0322	5.9081	3.9791	3.3044	3.0387	6.6558	6.9111	7.3332	8.9742	5.5858	3.8156	5.3204	2.9022	5.7003	7.0687	5.4568	4.785	4.9906	2.6794	5.3647	3.3039	11.4227	5.1543	4.7232	5.7129	1.5245	6.58	2.8084	7.2398	7.6682	4.7983	5.6951	5.3208	5.5208	6.3722	4.9792	4.2563
KRT87P	0.0471	0.0198	0.0259	0.0235	0	0.021	0	0.1829	0	0.0201	0	0	0	0	0.0202	0.0092	0	0.0899	0.0095	0.0069	0.0248	0.0196	0.145	0.0076	0.0392	0.1369	0	0.0138	0.0307	0	0	0.0192	0.1626	0.0197	0	0	0	0.0136	0	0.0142	0	0.011	0.0272	0	0	0.0185	0.0131	0.0088	0
AL359091.3	0	0	0	0	0	0	0	0	0	0	0	0	0	0	0	0	0	0	0	0	0	0	0	0	0	0	0	0	0	0	0	0	0	0	0	0	0	0	0	0	0	0	0	0	0	0	0	0	0
SPDYE13P	0	0	0	0	0	0.0233	0	0	0.1105	0	0	0	0.0394	0	0.1013	0	0	0	0	0	0	0	0	0.017	0	0	0.0576	0	0	0	0.1124	0	0	0.0439	0	0	0	0	0	0.1735	0	0	0	0.0398	0	0	0	0	0
AC021088.1	0	0	0	0	0	0	0	0.0162	0	0	0	0.0269	0.013	0	0	0	0	0	0	0.0758	0	0	0	0	0.0144	0.0288	0	0	0	0.0143	0	0	0	0	0	0	0.0238	0	0	0	0	0	0.0601	0	0	0	0	0	0
AC020978.8	0	0	0	0	0	0	0	0	0	0	0	0	0	0	0	0	0	0	0	0	0	0	0	0	0	0	0	0	0	0	0	0	0	0	0	0	0	0	0	0	0	0	0	0	0	0	0	0	0
RNU6-63P	0	0	0	0	0	0	0	0	0	0	0	0	0	0	0	0	0	0	0	0	0	0	0	0	0	0	0	0	0	0	0	0	0	0	0	0	0	0	0	0	0	0	0.1698	0	0	0	0	0	0
AC020663.3	0.1534	0.6145	0.1545	0.0384	0.1513	0.0854	0.1198	0.0835	0.1293	0.1801	0.0153	0.2481	0.0384	0.1801	0.1234	0.075	0.2501	0.1612	0.1084	0.4252	0.3026	0.1707	0.1397	0.0745	0.1172	0.2125	0.0983	0.2593	0.0667	0.0527	0.1057	0.1724	0.1267	0.1607	0.1046	0.0356	0.0704	0.0442	0.0898	0.2193	0.2328	0.1436	0.2514	0.1311	0.0386	0.1411	0.1172	0.1297	0.0183
AC005355.1	0	0.0494	0.0215	0	0	0.0522	0	0	0.0247	0.05	0	0.0606	0.0294	0.0688	0	0	0.0225	0	0.071	0.0342	0	0.0163	0.0164	0	0	0	0	0.0345	0	0.0322	0	0	0.0352	0	0.02	0.0181	0.0269	0	0	0.0353	0	0	0	0.0223	0.0393	0	0.0163	0.044	0
MIR466	0	0	0	0	0	0	0	0	0	0	0	0	0	0	0	0	0	0	0	0	0	0	0	0	0	0	0	0	0	0	0	0	0	0	0	0	0	0	0	0	0	0	0.1921	0	0	0	0	0	0
CASC1	0.3038	0.7888	0.5554	0.2789	0.6105	0.7005	0.1329	0.3614	1.1891	0.6656	0.316	0.7408	0.6572	0.6489	0.5991	1.1745	0.3208	0.4334	1.3903	1.3894	1.6254	0.9973	0.7028	0.9952	1.6816	0.5104	0.5552	0.4875	1.2447	1.1366	0.4168	1.1064	1.2558	0.855	0.6962	1.3541	0.9687	0.1511	0.422	0.6909	0.6685	0.2984	1.0057	0.7159	0.6796	0.581	1.5165	0.3516	0.481
KIAA1549L	1.3521	0.7146	2.4491	0.2922	2.4357	1.5396	0.0354	3.7834	1.4649	0.5032	0.9886	1.0529	2.0686	0.0425	2.3556	1.6304	0.172	0.4881	0.0768	0.1764	0.3091	0.4705	3.3075	0.2077	0.42	2.1622	0.5123	3.4409	0.6571	0.7985	0.1904	0.3026	0.1897	0.0095	3.2185	2.3262	1.5082	0.2741	2.2546	0.7737	0.5013	0.6723	1.2169	0.0955	3.3142	1.1388	0.7589	0.8553	0.026
AL353807.2	0.0543	0.1604	0.2786	0.0634	0.3752	0.0847	0	0.2366	0	0.1624	0.3786	0.0984	0.5243	0.1488	0.0816	0.3717	0.7295	0.2181	0.3071	0.3884	0.4002	0.3703	0.2131	0.5538	0.4228	0.2107	0.2089	0.2795	0.1654	0.2612	0.0583	0.1555	0.7997	0.6374	0.1946	0.294	0.1745	0.2741	0.6999	0.515	0.6217	0.178	0.4401	0.7945	0.2551	0.3998	0.4228	0.2144	0.909
MYL9	11.0667	17.7788	21.4103	5.772	24.3825	10.084	8.1112	29.5676	24.2544	10.5168	4.4701	10.2232	43.0223	35.8711	2.1673	14.1169	48.6404	34.2564	8.1244	6.348	69.3997	19.4665	20.0386	14.3204	18.3719	2.9704	3.649	25.9293	17.9379	42.4769	21.3222	113.7676	39.2889	33.6892	11.5696	23.2085	1.0001	63.1985	21.9023	9.1267	16.6585	27.538	4.2041	68.2265	6.102	18.4056	6.9328	35.5244	6.4862
DPH2	4.0645	5.768	6.0712	3.0524	5.3477	8.5517	4.6559	4.9067	8.0248	3.2248	4.6392	3.9091	5.515	6.2636	5.396	4.8562	4.946	5.2287	5.7932	8.1575	5.7916	5.461	6.6084	5.4106	4.8407	6.0719	6.3991	7.9969	5.4568	6.0984	6.531	5.5795	5.4983	6.6922	5.499	5.5013	8.0045	5.0209	6.803	9.5091	3.2344	3.2006	4.9729	6.1718	4.8025	7.1289	6.3653	5.6942	2.9484
PANK2	2.6741	2.618	3.6852	2.0956	3.3621	2.6979	3.3707	3.1701	3.8054	3.416	4.1334	3.2939	1.7331	5.3798	4.2624	2.8471	3.8121	4.3525	3.278	3.0691	4.3441	4.9168	3.0518	2.8924	2.1557	3.8414	3.2223	2.6443	2.6559	2.5408	4.4892	3.8194	3.105	4.372	2.4162	2.8604	2.8281	1.9497	3.8223	4.4529	2.9844	2.5137	3.0426	3.8101	2.3249	5.0208	2.8539	3.4089	1.4808
GRPEL2	5.904	11.8646	9.5835	6.2359	7.0355	13.1404	4.9709	8.5412	9.6398	11.2367	6.3066	8.4127	10.0542	7.2132	6.7106	5.9734	5.3822	7.9325	11.3667	7.2596	8.4622	9.9147	10.4927	7.1505	6.1825	9.6204	9.5292	8.8985	7.8989	11.959	5.7312	9.3376	4.9878	6.5474	9.1201	6.1623	11.4616	5.8177	10.8998	6.6953	8.1052	7.8418	8.957	8.0945	11.3179	11.5234	10.8223	11.138	11.544
LINC01234	0.3147	2.3212	0.6116	0.1494	0.0767	8.7538	0.1458	0.0406	0.0629	2.2825	4.0085	2.5857	1.9901	5.0458	3.594	4.9641	1.0057	0.1106	4.7459	7.9439	0	0.4075	0.8208	5.187	1.6049	0.1086	3.8842	1.2755	4.4378	1.2096	1.4406	0.0191	0.028	4.4771	0.1337	0.1818	0.9288	0.718	0.4495	12.2222	0.0305	0.31	0.7737	4.4227	0.5945	3.0573	1.9344	0.6523	0.1115
AP001347.1	1.3983	4.5548	2.8047	1.6475	1.7099	2.6102	0.8865	2.3963	4.0659	2.5834	1.6564	2.8074	2.7193	4.4582	7.0454	6.0337	2.4027	0.9216	4.5039	4.2552	1.0445	1.1177	2.7481	1.1626	5.3728	4.8521	2.8819	2.6128	4.2853	3.9991	2.1289	1.5168	0.2698	3.5254	3.7895	2.7408	5.9421	2.5002	3.2266	1.9063	4.6697	4.9332	2.042	3.4115	2.7028	4.6024	2.8247	2.7363	5.3213
AC037441.2	0.0266	0	0	0.0466	0	0	0	0	0.0196	0	0	0	0	0	0	0	0	0.0178	0	0	0	0.013	0	0.0151	0	0	0.0171	0.0411	0	0.0256	0	0	0	0	0	0	0	0	0	0	0	0	0	0	0	0	0	0	0
CLK1	27.6855	37.2206	25.1461	13.2618	21.4225	27.8647	65.5197	19.3672	21.0098	15.7783	15.1146	17.1537	25.8116	30.7797	20.1335	26.5219	28.4496	21.3737	32.8218	45.792	35.024	13.3364	24.6861	16.7643	10.5575	29.7844	22.6482	24.038	24.5363	23.333	12.4253	24.3076	38.4716	37.9628	16.7444	21.2237	12.4361	18.1645	24.4758	23.938	45.2744	23.251	29.865	23.9465	23.2798	17.2366	14.2228	36.0637	12.5747
DCAF17	5.6044	6.557	6.4413	3.0376	5.3036	7.1213	4.4057	4.4314	5.3468	4.2455	5.9392	5.6723	4.8589	6.2069	4.9187	6.6427	4.9862	4.9518	6.0769	7.2968	7.0482	5.6916	6.279	5.5005	6.2433	4.9769	6.3137	6.0623	4.9981	6.3195	4.9547	5.3376	3.8271	5.439	4.7005	6.2832	5.7374	3.8126	5.934	5.967	3.8279	2.8534	8.72	4.9828	4.8077	5.9397	5.8813	6.2739	1.8046
RF00019	0	0	0	0.1235	0	0	0	0	0	0	0	0	0	0	0	0	0	0.7076	0	0	0	0	0	0.3594	0	0	0	0	0	0	0	0	0	0	0	0	0	0	0	0.1114	0	0	4.855	0	0	0	0	0	0
HSPA4L	0.2665	0.2611	0.2189	0.7204	2.2006	0.2821	1.0445	0.7691	0.3643	0.1368	0.7812	1.4681	0.7968	0.3987	0.2889	0.3378	0.7706	0.6619	0.4171	0.1471	0.5814	0.4897	0.5497	0.3646	0.5462	0.2653	0.2373	0.4456	0.623	0.5241	0.7853	0.5386	0.3687	0.4163	0.6079	0.8015	0.0628	0.2387	0.3059	0.4344	2.2968	0.4161	0.6762	0.2174	0.4044	0.3633	0.5333	0.7212	0.1119
AC011611.4	0	0	0	0	0	0	0	0	0	0	0	0	0	0	0	0	0	0	0	0	0	0	0	0	0	0	0	0	0	0	0	0	0	0	0	0	0	0	0	0	0	0	0	0	0	0	0	0	0
AP000432.2	0.0117	0	0.015	0.0341	0.0269	0	0	0	0.0086	0	0	0	0	0	0	0	0	0.0078	0	0.006	0.1827	0	0.0057	0	0.0057	0	0	0.012	0	0	0	0.0417	0	0.0057	0	0.0063	0	0	0	0	0	0	0.0236	0	0	0	0.017	0	0
AP005899.1	0.3517	5.9669	1.0984	0.4104	0.7586	0.7876	0.2804	0.6218	1.3618	0.394	0.245	0.7164	0.4048	1.2038	0.5446	1.9842	0.944	0.5879	2.2975	1.4361	0.7283	0.599	1.6159	0.9457	1.9234	0.8948	0.5632	0.6557	0.6353	0.6971	0.4948	0.6916	0.2541	0.1074	0.9444	0.5232	0.3175	0.266	0.5404	0.6712	0.6465	0.2519	1.0678	0.1753	0.3353	0.4648	0.4702	0.9539	0.2573
MEFV	0.0422	0.0256	0.0509	0.0463	0.0514	0.0116	0.0181	0.0108	0.0073	0.0667	0.0242	0.0674	0.0152	0.0578	0.0261	0.0407	0.0866	0.0996	0.028	0.0203	0.0411	0.1328	0.0316	0.0843	0.0314	0.0337	0.0159	0.0306	0.0189	0.0095	0.0399	0.0852	0.0287	0.0291	0.0267	0.0752	0.0159	0.0776	0.0145	0.0287	0.0852	0.0081	0.375	0.0066	0.099	0.0114	0.0217	0.0294	0.0083
TUBB8P12	0.0531	2.6347	0.8431	0.3767	0.2351	0.4266	0.1639	1.0805	4.5996	0.0916	0.1651	0.1221	0.0645	0.6155	0.2086	2.1352	0.5156	0.5629	0.0231	1.1139	0.1881	0.4136	1.0575	0.1018	0.3616	1.117	1.0627	0.6347	0.6962	0.2042	0.1402	0.374	0.0344	0.4473	0.5658	1.8878	0.7281	0.1731	0.0335	0.2453	0.6411	0.1807	2.9393	0.2824	0.0623	1.2098	0.1192	0.0215	0.0068
AL117372.1	0.1563	0.3459	0.0668	0.0912	0.1199	0.2841	0	0	0	0.0778	0.1452	0.1651	0	0.0357	0.0196	0	0.035	0	0.0368	0.0532	0	3.3973	0	2.861	0.5066	0	0	0.2412	0.1189	0.0751	0.0558	0.298	0	0.7892	0.0622	0	0.0418	0.0788	0	0.2194	0	0	0.1406	0.1039	0.1528	0.3593	0.0253	0.0343	0.1307
MIR409	0	0	0	0	0.2457	0	0	0	0	0	0.4462	0	0	0.1462	0	0	0	0	0	0	0	0	0	0	0.1038	0	0	0	0	0	0	0	0	0	0	0.1155	0	0	0	0	0	0	0.1441	0	0	0	0	0	0
AC068287.1	0	0	0	0	0.0466	0.0632	0	0	0	0	0.1129	0	0	0.0555	0	0	0	0	0	0	0	0	0	0	0	0	0	0	0	0	0	0	0	0	0	0	0	0	0	0	0	0	0.2188	0	0	0	0	0	0
ARHGAP30	1.1263	0.7978	0.8865	0.7715	1.1247	0.7541	0.2969	0.668	0.7454	1.0581	0.704	0.8551	0.6461	0.8115	0.5106	0.985	1.0426	1.1905	0.4202	1.0221	1.8906	2.8955	1.2035	1.7671	1.9376	1.0276	0.9861	1.11	0.7974	0.9349	0.5897	1.219	0.8139	0.5815	0.589	2.2685	0.8111	0.4167	0.7408	0.4972	0.5248	0.6302	0.9113	0.6307	0.3823	0.7251	0.8587	0.7515	0.154
LINC01177	0	0	0	0	0	0	0	0	0.0658	0.0333	0	0	0	0	0	0	0	0	0	0.0228	0.1643	0	0	0	0	0.0216	0	0.0229	0	0.0214	0	0.0638	0	0	0	0	0	0	0	0	0	0	0	0	0	0	0	0	0
LINC01842	0.3269	0.2067	0.0599	0	0.1075	0.1941	0.1135	0.0169	0.0919	0.0233	0.282	0.0423	0.0273	0.2132	0.2572	0.0639	0.0418	0.1041	0.044	0.4609	4.2988	0.303	0.061	0.3702	0.1817	0.2867	0.1795	0.1762	0.2368	0.3741	0.0501	3.8966	0.0818	0.8521	0.0372	0.4211	0.025	0.1099	0.0547	0.1803	0.0254	0.4079	1.1976	0.269	0.2192	0.1145	0.0151	0.1433	0
NCBP3	6.8192	10.5838	9.517	3.5019	4.9276	10.0741	1.3711	6.7147	7.8931	7.6092	5.4361	6.6912	6.0068	8.188	6.3037	5.006	5.1521	5.0785	12.6023	10.7366	6.6801	7.0282	9.7227	7.9069	9.3168	7.4794	11.5567	8.8926	7.6203	7.9635	9.594	7.9739	5.8391	7.4727	8.6026	13.1509	8.6612	3.4107	6.6451	9.7081	2.7044	2.7469	6.9266	3.8674	6.5723	9.2158	8.8742	10.1499	0.9538
HSFY8P	0	0	0	0	0	0	0	0	0	0	0	0	0	0	0	0	0	0	0	0	0	0	0	0	0	0	0	0	0	0	0	0	0	0	0	0	0	0	0	0	0	0	0	0	0	0	0	0	0
CCDC144B	0.2768	1.3084	0.9339	0.1558	0.024	0.8817	0.2143	0.0107	0.2042	0.4025	0.1604	0.2484	0.0129	0.2985	0.2658	0.0235	0.2367	0.1507	0.6142	0.3489	0.2164	0.4518	0.3926	0.0666	0.7884	0.2161	0.1914	0.2507	0.3782	0.0047	0.0499	0.557	0.2201	0.2262	0.4941	0.0159	0.2458	0.0716	0.2409	0.3392	0.012	0.2667	0.3587	0.1384	0.0172	0.3119	0.1298	0.5976	0.0041
IL5	0.0226	0.0445	0.0579	0.0176	0.0173	0.0235	0.2884	0.0164	0.0556	0.0788	0.042	0.0205	0.0132	0.0516	0.0283	0	0.182	0.0101	0.0532	0.0385	0.1803	0.022	0.0074	0.0341	0.0293	0	0.0097	0.0233	0.0229	0.0145	0.0404	0.1293	0.0792	0.0589	0.009	0.0163	0.0121	0	0.0265	0.0238	0.0123	0	0.0508	0.01	0.0088	0.0693	0.0147	0.0099	0.063
CDK2AP2	24.6182	14.0326	17.3252	10.8498	15.971	11.7829	9.2393	10.9033	15.0879	18.0296	20.247	31.63	17.6067	26.1101	21.2998	7.2985	25.1021	40.5929	21.0889	24.5956	35.9307	13.3949	16.3591	21.0214	5.8733	20.9643	17.7611	15.1143	18.6668	17.0742	12.4043	30.5671	17.3649	34.9867	11.7689	24.1684	21.4358	33.3501	26.4149	7.5266	11.2942	14.1476	22.2735	28.4441	23.243	16.3024	10.7981	15.242	4.7443
SURF2	6.9866	10.7457	12.3577	9.5786	12.7876	10.8117	6.356	9.4481	24.0086	8.8422	18.0462	16.0345	13.2428	17.2648	15.8361	9.9459	10.7149	19.1011	17.9786	12.5825	19.5424	19.649	9.5812	17.5942	9.2613	16.5112	15.9867	14.6059	19.651	12.4029	9.8162	10.9082	21.4174	21.8869	14.4268	22.6515	12.852	12.2258	18.8581	19.4845	9.8669	18.6455	12.0377	29.716	14.1544	12.8475	19.5867	12.324	5.654
CARD8	3.4121	2.5902	4.0097	1.9892	4.1035	4.2643	2.4056	3.2498	2.8341	4.1949	2.3711	3.7794	2.5933	4.3516	3.276	3.7917	2.8492	4.8753	4.1587	4.2012	5.4688	3.987	3.7346	3.6299	2.6368	3.5926	2.678	4.3758	4.7109	4.305	2.2993	5.5625	1.5456	4.884	3.1861	3.9228	2.5611	1.4151	3.687	3.8714	3.1259	2.4626	3.309	2.8838	3.5271	3.2758	2.7731	3.8816	1.4464
UNC5D	4.035	1.5169	4.1973	1.8357	1.4181	0.0896	2.0491	3.6869	0.1924	0.5912	1.5093	0.5185	5.4389	0.8507	0.9247	0.0771	0.3769	0.7348	0.6152	0.009	0.5372	0.3959	4.1645	1.9313	1.1974	2.6628	4.9455	9.7763	2.309	0.8361	1.7028	2.6925	0.2568	1.049	1.8156	6.717	3.6855	2.6021	1.8558	0.2491	0.813	1.4806	1.0249	1.3516	5.1533	0.2887	0.5493	1.9205	1.7804
RNA5-8SP6	1.7306	0	0.8064	0.6426	0.724	0.1226	0.8602	0.1712	1.1605	0.235	1.6439	1.6381	0.4139	0.9694	0.3544	0.3228	0	1.1573	0	0.3212	5.5024	0.1531	1.2338	0.3563	0.153	0.5338	0.2016	0.8092	0.2393	0.4536	1.9394	3.4876	1.9015	0.615	0	0.766	2.1465	0.3967	2.8548	0.2485	2.3139	1.4168	1.38	0	0.4615	0.0723	0	0.2069	2.2365
RF00019	0	0	0	0	0.2751	0	0	0.2602	0	0	0	0	0	0.1637	0.0898	0	0.321	0	0.1689	0	0	0	0.1172	0.4061	0.2325	0	0.3064	0.246	0	0	0	0	0	0.3506	0.2854	0	0	0	0	0	0	0	4.1953	0.1589	0.1403	0	0	0	0
PRORSD1P	0.7053	1.2326	0.9246	0.2596	0.387	0.9805	0.4548	0.8264	1.0804	0.7861	0.4081	1.0659	0.785	0.9434	0.5581	1.5509	0.6772	0.7836	0.9579	2.8912	1.5778	0.8976	0.7551	1.1118	0.6277	0.4522	0.9313	0.6027	0.2806	1.0062	0.5466	1.3267	1.5622	1.0498	0.4921	0.6339	0.4789	0.1805	0.3557	0.6626	0.7181	0.3908	1.6692	0.4975	0.6174	0.5337	0.6331	1.3128	0.1815
SEMA4A	0.8525	2.5738	0.6403	0.8214	1.531	0.6558	0.9466	0.3547	3.0596	1.5759	0.5664	1.8275	0.8576	0.9515	0.3779	0.9603	1.8606	0.8935	1.7532	1.6091	1.9122	5.6895	1.0622	5.7308	3.4149	2.2673	1.0279	1.45	0.9536	1.513	1.4706	1.2321	4.4065	1.6978	0.7225	0.8429	2.5644	0.625	0.3481	0.33	1.402	0.8416	1.6339	1.2687	0.6746	1.1494	2.3791	0.9021	0.2127
MIR7515HG	0	0	0	0	0.0077	0	0	0	0	0	0.007	0	0	0	0	0	0	0.0135	0	0	0	0	0	0.0038	0	0	0	0.0224	0.0051	0	0	0.0048	0	0.0066	0	0	0.0054	0	0	0.0018	0	0	0.0249	0	0	0	0	0	0
RNU6-238P	0.564	0.3329	0.5782	0	0.1298	0	0	0.3682	0.1664	0.8425	0.4715	0.9192	0	1.0811	0.7623	0	0.3028	0	0.956	1.4971	0.6229	0.2196	0.1106	1.1495	0.2194	0.8747	0	0.116	0.1716	0.2168	0	0	0.3556	1.2126	0.5385	0.4882	0.3621	0	1.0564	0	1.2904	0.5541	6.2412	0	0.9265	0	0	0.2967	0.1887
ZNF669	2.3974	6.1388	3.7144	1.8533	3.064	3.7447	1.2107	2.3393	4.4899	1.6148	2.0192	3.368	2.2614	4.8205	2.4304	3.3783	4.6605	1.4942	7.3955	2.725	4.0129	3.6674	3.9839	5.6614	13.2521	4.9404	6.0499	3.957	4.4371	5.0607	3.9292	4.1023	0.7552	1.6289	4.3174	2.4697	3.9548	1.7113	3.0329	6.5112	2.5658	3.0652	2.7056	2.825	2.9546	3.0093	4.7097	5.4005	2.1512
RPS20	581.6107	343.1517	260.118	1970.7014	300.3543	292.4904	1030.1829	351.2652	432.6019	499.0457	1056.5564	463.1446	724.4344	441.9165	798.7697	897.5678	546.3326	531.7883	318.2054	527.6547	362.2442	104.4461	190.7447	369.6704	198.9721	613.6825	254.6258	419.5967	268.8596	276.7546	203.3805	177.9752	1010.3207	626.4635	268.8306	290.5519	281.6524	1172.6377	485.4511	274.7612	907.7993	1609.9847	614.2305	437.5682	595.8802	253.8901	256.5048	237.7113	2188.2321
RPL21P88	0.0274	0	0.1054	0	0	0	0.05	0	0	0.041	0	0.0248	0.0241	0.0375	0.0824	0	0.0368	0	0.0387	0.056	0	0.0267	0.0269	0	0.2133	0	0	0.0564	0.0834	0.0791	0	0	0.0576	0.0268	0	0.1484	0	0	0	0	0	0	0.2221	0.0364	0	0.0504	0.08	0	0
MST1	0.682	2.2069	1.4888	0.2552	0.8983	1.092	1.886	0.8906	2.165	1.8093	0.2818	1.1179	2.7061	5.7352	1.0119	1.8562	3.7596	1.4595	2.671	3.8633	3.2209	1.014	1.8305	1.2782	0.8003	1.3815	1.5306	1.5871	1.22	1.7404	1.0109	2.23	5.7369	6.1484	1.1341	2.1043	0.8947	0.351	1.8365	1.3174	1.3414	0.8279	1.1457	1.7316	1.4239	1.3645	1.0109	1.4104	0.0905
MIR4708	0	0	0	0	0	0	0	0	0	0	0	0	0	0	0	0	0	0	0	0	0	0	0	0	0	0	0	0.1836	0	0	0	0	0	0	0	0	0	0	0	0	0	0	0	0	0	0	0	0	0
FO393409.1	0	0.0129	0.0112	0	0.0301	0	0.0159	0.019	0	0	0.0728	0.0395	0.0076	0.0119	0	0.0834	0.0468	0	0.0123	0.0089	0	0.017	0.0085	0.0296	0.0339	0	0.0112	0.0359	0	0.0168	0.0093	0	0.0092	0.0341	0.0416	0.0189	0.0699	0	0.0204	0.0184	0.0285	0.0143	0.1176	0.0116	0.0205	0.0401	0.0339	0.0229	0
ZDHHC21	2.2642	3.8591	4.6359	2.1167	3.2443	6.0892	4.2447	3.5004	4.8635	4.491	2.9106	3.1813	2.5509	5.8601	2.4202	3.7425	3.5958	4.4636	7.7244	5.6244	5.994	5.8296	5.4264	5.5985	4.3969	3.0186	4.2789	3.2857	5.4688	4.4447	3.3613	5.2193	5.2952	7.2051	5.6609	6.2431	2.3313	2.2886	3.9739	6.697	5.8209	4.046	4.9968	4.7877	2.6671	4.7107	5.9741	5.2917	4.1115
BRDT	0.1297	0.0326	0.0495	0.0322	0.0476	0.0258	0.1508	0.0841	0.0407	0.0783	0.0384	0.0624	0.0581	0.0529	0.1181	0.0755	0.0444	0.059	0.0312	0.1014	0.0203	0.0564	0.0108	0.0531	0.051	0.0802	0.0283	0.0738	0.0462	0.0318	0.0089	0.0197	0.0667	0.0162	0.0395	0.0597	0.0221	0.0028	0.0517	0.0349	0.0631	0.0678	0.3611	0.011	0.0777	0.033	0.0805	0.0254	0.0646
UBE2V2	8.3856	9.9956	10.0104	18.481	12.8695	11.9683	22.9962	7.035	14.4455	13.4597	16.5193	11.8827	11.5496	12.9317	15.5789	14.8768	7.5821	11.1694	12.6863	11.3164	11.9777	4.7281	9.1551	12.0729	12.1114	15.9517	14.5992	12.6423	10.0969	11.6005	11.6392	10.9317	7.6261	15.3682	14.1263	13.1851	10.6101	19.9677	11.917	12.9273	19.7677	12.9155	10.1098	16.4631	16.2824	11.07	12.0252	12.1019	13.495
LINC02004	0.122	0.06	0.0521	0	0.0936	0	0.3706	0	0.12	0.0608	0.1133	0.0736	0.1427	0.0557	0	0.0556	0.1092	0	0	0	0.0749	0.0396	0	0.2763	0.0791	0.0394	0.0521	0	0.0619	0.0391	0	0.4653	0.3419	0	0.3398	0	0.0653	0.2051	0	0.0856	0.5982	0.1998	0.0549	0.1081	0	0.0374	0.0395	0.0535	0.6122
RF00019	0	0	0	0	0.1376	0	0	0.1301	0	0	0	0.1083	0.1049	0	0	0	0	0.3198	0	0	0	0	0	0	0.1163	0	0	0	0	0	0	0	0.1257	0	0	0	0	0	0	0	0	0	0.1614	0	0	0	0	0	0
DAPL1	26.9563	114.7676	37.658	5.5811	2.0384	119.6486	1.448	0.804	22.0458	100.9028	2.8667	63.8539	14.5551	161.7462	43.4878	264.4692	7.7843	2.7308	7.7209	111.178	73.2829	119.1303	39.866	97.133	51.6472	9.1103	116.6514	213.4435	0.7856	72.9312	49.6327	43.1314	102.1078	394.3987	4.9783	103.9124	191.5158	5.7207	60.6602	47.499	23.6297	13.3597	11.4826	5.6383	498.2082	18.0863	53.3626	13.2486	0.6112
NOP53-AS1	0.2214	0.686	0.3689	0.2584	0.1019	0.5865	0	0.6987	0.2287	1.1908	0.3702	0.822	0.2913	0.667	0.5819	1.1206	0.2972	0.4738	1.0947	1.2659	0.4076	0.4094	0.2171	0.6268	0.3875	0.7727	0.4255	0.615	0.4379	0.2128	0.1424	0.4117	0.5352	0.0649	0.5021	0.8624	0.2132	0.3126	0.1815	1.3523	0.0724	0.1813	0.2988	0.3531	0.2858	0.4072	0.2369	0.3203	0
AC000099.1	0	0	0	0	0.0216	0	0.0228	0	0	0	0	0	0	0	0.0047	0	0	0	0	0	0.0115	0	0	0	0	0.0061	0	0	0	0	0	0	0	0	0	0	0	0	0	0	0	0	0.0169	0	0.0073	0.0057	0	0	0
CCDC18-AS1	1.1467	2.1674	1.5014	1.1078	1.2072	2.1876	2.6956	1.0357	2.1229	1.8138	0.5639	1.4612	1.4855	2.5176	0.6415	3.0174	2.0857	2.3089	3.1161	6.3408	4.5712	1.5877	1.4106	1.6746	1.3457	1.3029	1.9108	1.6525	1.2276	1.7527	1.3229	3.1692	6.8476	5.264	1.2673	1.7434	0.8902	0.64	1.4887	1.7756	1.2575	0.9777	2.0701	1.783	0.9615	1.1554	1.273	1.4391	0.4889
AC022493.2	0.1491	0.2934	0.0956	0.029	0	0.0387	0	0.027	0	0	0	0.0225	0	0.034	0	0	0	0	0.0351	0.1015	0	0	0.0487	0	0.1208	0	0.1274	0.1023	0.0378	0.0239	0	0	0.0523	0	0.0297	0.0269	0	0	0.0291	0.0523	0	0.1628	0	0	0	0.0229	0	0	0
AC104785.1	0.4474	0.72	0.6254	1.1627	0.5849	1.1723	0.7042	0.5532	1.0199	0.7898	0.34	1.031	0.6777	0.8353	0.6871	0.5563	0.3002	1.931	0.4021	1.2456	1.4598	1.3458	0.5581	0.8749	0.9886	0.6899	1.042	0.5857	0.7734	0.6254	0.2616	1.1051	2.4791	1.1328	1.1164	0.682	0.4896	0.1846	1.0236	0.7708	0.9305	0.3995	1.1525	0.8918	1.0259	1.2714	0.8701	1.4174	0.136
AC008870.2	0.3853	3.704	1.0324	0.3134	0.4568	0.6731	0.7448	0.5209	0.7407	0.8373	0.2765	0.4757	0.4813	0.6395	0.4296	1.4374	1.1284	0.4685	1.0391	2.1696	0.6448	1.091	0.9729	0.8594	1.1126	0.7131	0.4936	0.8528	0.3375	0.7967	0.413	0.5678	0.27	1.0042	0.5435	0.5053	0.3936	0.2708	0.7518	0.5656	0.4961	0.5353	1.0715	0.6518	0.5617	0.6441	0.2839	0.9214	0
AC037198.1	0.3262	0.2647	0.5644	0.0381	0.2064	0.1525	0.2676	0.0532	0.0722	0.1462	0.0909	0.6794	0.8011	0.1117	0.196	0.2008	3.4155	0.0218	0.1152	0.1166	0.03	0.1588	0.3198	0.1108	0.0634	0.2372	0.1254	0.0671	0.0993	0.2508	0.0874	0.1633	0.0343	0.2072	0.0584	0.1412	0.1047	0.5264	0.1337	0.0172	0.2133	0.3205	0.1981	0.2168	0.0574	0.09	0.0952	0.1287	0
FXYD7	1.8385	4.1965	0.4695	0.1555	2.828	1.1209	0.4613	0.2319	0.6191	1.4429	2.8212	5.1686	1.1742	3.9857	3.6812	0.6013	1.654	1.6303	2.7663	1.5981	1.1036	5.53	0.4048	1.7121	1.399	2.5569	1.0326	1.1306	1.7227	1.8437	0.6141	0.181	4.7325	5.9306	0.5406	1.6864	2.7906	0.6986	0.2183	2.497	2.3404	1.4179	0.6832	4.4529	0.086	2.8111	3.3684	0.6745	0.2897
ZKSCAN3	2.5607	4.5979	2.7973	1.824	2.6763	3.7513	1.5257	3.1008	3.5628	3.0323	1.586	2.5443	2.4125	2.9889	3.0205	3.7729	1.9754	2.2954	3.1602	3.7942	3.7274	5.5734	3.1928	3.7131	4.6531	4.0477	3.8849	3.6706	2.9076	3.6666	3.5788	4.3051	1.7388	3.369	5.3848	4.6488	3.2503	1.432	2.6567	5.3797	1.8846	1.6214	2.2961	3.1801	3.3262	2.6405	4.3105	3.3937	1.429
AC073941.2	0	0	0	0	0.1589	0	0	0	0	0	0	0	0	0	0	0	0	0	0	0	0	0	0	0	0	0	0	0	0	0	0	0.0395	0	0	0	0	0	0	0	0	0.0451	0	0.0373	0	0.0324	0.0508	0	0	0
EEF1DP3	0.0689	0.1597	0.0967	0.2335	0.2076	0.0102	0.0897	0.0857	0.1307	0.0735	0.1234	0.0683	0.0604	0.0269	0.0591	0.0494	0.0748	0.1228	0.0927	0.0636	0.2959	0.0543	0.0772	0.156	0.1403	0.0668	0.042	0.0641	0.0399	0.1229	0.0316	0.4645	0.9446	0.0705	0.0274	0.0994	0.0474	0.1158	0.0768	0.1036	0.0536	0.0322	0.5976	0.0392	0.1155	0.0543	0.0415	0.0431	0.0658
RNA5SP246	0.6029	2.6684	0.1288	0.1172	0.578	0.3131	1.2819	0.328	1.6305	0.3002	0.28	0.2729	0.1762	3.577	0.679	1.2369	0.2697	0.2688	4.2579	0.6155	2.5894	0.7823	0.7879	1.479	0.6839	0.7792	0.3862	0.5168	0.6114	1.4484	0.7539	1.0059	0.7392	1.4729	1.1993	0.4348	0.1613	0.304	0.2353	0.2116	0.4926	0.329	0.678	1.2018	0	0.4619	0.5863	0.3964	0
RF00019	4.424	5.998	11.0317	1.3953	2.2011	16.3938	1.0896	7.6762	9.1723	5.3585	5.6637	4.5468	3.8799	9.6592	9.2473	0.1635	2.8887	6.0768	10.3026	17.8224	7.9235	10.1242	8.6733	4.7384	4.3015	12.5173	11.4885	6.7649	5.4568	5.1709	7.8183	14.7063	5.5291	5.2584	5.5657	7.6325	5.5658	3.1352	13.0179	4.0288	0	2.7409	2.9044	11.4412	14.7306	3.8477	6.9765	6.7617	0
OACYLP	0.1246	0.1504	0.0581	0.022	0.0348	0.0706	0.0413	0.0863	0.0613	0.0282	0.021	0.0957	0.0265	0.0155	0.0397	0.0723	0.0101	0.0354	0.08	0.027	0.007	0.0772	0.0296	0.1796	0.0734	0.0696	0.0339	0.0583	0.046	0.1379	0.0526	0.0216	0.004	0.0738	0.2569	0.0449	0.0061	0.0152	0.0442	0.1113	0.0494	0.0247	0.1682	0.01	0.0399	0.1528	0.0404	0.0099	0.0947
MBD1	7.9031	14.3404	9.8656	4.5956	7.0336	10.46	4.9319	12.6318	12.4552	4.7213	4.0099	9.1297	7.8233	8.8835	6.6928	10.8975	7.0138	7.4449	15.0134	12.1582	8.9784	10.1716	8.7531	16.5096	18.899	7.8638	14.365	9.739	9.9374	9.549	8.4298	9.4313	7.2815	8.5601	7.623	9.5822	10.1349	4.9458	7.9489	11.6084	4.3728	4.9686	11.1517	10.6897	8.7583	10.4645	12.8568	9.5367	4.2792
RPL36P18	0	0	0	0	0	0	0	0	0	0	0	0.034	0	0.0515	0	0	0.0505	0.0503	0	0	0.0692	0.0366	0.0369	0	0	0.1093	0	0	0.0572	0.0361	0.0403	0	0.0395	0.0735	0	0.0407	0	0.0379	0.044	0	0	0	0.0507	0	0	0.1037	0	0	0.1887
IGKV2D-10	0	0	0	0	0	0	0	0	0	0	0	0	0	0	0	0	0	0	0	0	0	0	0	0	0	0	0	0	0	0	0	0	0	0	0	0	0	0	0	0	0	0	0	0	0	0	0	0	0
AP000439.3	0	0	0.0129	0	0	0	0.055	0.0055	0.0074	0.015	0	0.0091	0	0	0	0	0.0068	0	0	0	0.0093	0	0	0.0057	0	0	0	0	0	0	0	0.0504	0.037	0	0	0.0054	0	0.0152	0.0295	0	0.0329	0	0	0	0	0	0	0.0066	0
RNU1-38P	0	0	0	0	0	0	0	0	0	0	0	0	0	0	0	0	0	0	0	0.0848	0	0	0	0	0	0	0	0	0	0	0	0	0	0	0	0	0	0	0	0	0	0	0	0	0	0	0	0	0
MORN3	0.3628	0.9653	0.3497	0.1049	0.3175	0.3189	0.0509	0.1485	1.1711	0.9357	0.311	0.4941	0.2611	0.7685	0.787	0.7507	0.2414	0.2613	0.657	1.1207	1.5126	0.4436	0.2523	1.2183	0.6844	0.4869	0.4648	0.4051	0.3491	0.7212	0.5518	0.6785	0.4693	0.7152	0.2295	1.0232	0.5326	0.0751	0.2505	0.7412	0.3091	0.3909	2.5484	0.3008	0.2983	0.4191	0.4312	0.2161	0.1193
STX12	12.0127	7.4629	9.0592	7.4625	17.1046	9.8911	14.6018	9.2048	5.3798	7.0777	6.0291	7.2903	8.4603	10.1822	7.1571	11.2391	7.3107	10.0914	9.5733	8.265	12.55	8.8261	10.261	7.6843	9.2709	10.237	9.6903	10.3905	10.3101	10.1674	10.9807	12.285	6.5118	9.3641	9.6996	12.7783	7.2109	11.1146	10.6385	8.3737	15.2824	14.5332	8.1056	8.8088	9.5096	8.741	8.9579	9.089	9.7906
RAP2B	3.6475	0.9209	3.4711	4.245	6.3369	5.231	3.0351	1.0745	0.5144	7.1279	5.4961	5.6645	3.6736	5.0644	3.2807	1.9109	5.079	11.5176	4.3532	2.3175	5.8974	8.6827	5.5879	4.348	4.8669	1.4299	0.6966	4.6902	5.1334	4.527	4.3333	3.9682	3.3081	7.1818	1.5103	4.0993	0.18	5.6849	6.4823	4.6596	3.1717	5.0781	2.2177	3.6519	5.6872	5.7209	0.6994	5.4158	3.201
AL450327.1	0.0045	0.0067	0.0058	0	0.0157	0	0	0.0049	0.0469	0	0	0.0041	0	0.0311	0.0034	0.0684	0.0122	0	0.0193	0.0186	0.0084	0.0044	0	0.0051	0.0044	0.0044	0	0	0	0	0.0049	0.0065	0.0334	0.0266	0.0217	0.0147	0	0	0	0.0335	0.0148	0	0.0123	0.006	0.0053	0	0.0177	0.0119	0
FARP1	3.475	5.4977	7.128	2.3723	4.8782	6.0975	0.9458	7.8695	4.251	3.9245	5.7123	4.3087	5.3784	6.5013	5.0964	8.8431	7.575	1.7615	4.3559	3.9104	6.301	5.1262	8.8609	6.2627	5.3432	3.6344	8.7021	6.6755	5.7566	6.3195	4.9696	7.449	0.9342	4.3823	7.4584	4.9636	7.4801	3.7035	5.6455	7.5973	1.3043	1.3008	5.4764	5.9202	8.4498	5.1415	5.7264	7.8282	0.5163
FAM47C	0	0	0	0.0043	0	0	0	0	0	0	0	0.0033	0	0	0	0	0	0	0	0	0	0	0	0	0.0036	0.0035	0	0.0038	0.0056	0	0	0	0	0	0	0	0	0	0	0	0	0	0	0	0	0	0	0	0
CLMAT3	0.1692	0.1449	0.3217	0.1337	0.1381	0.119	0	0.1069	0.0966	0.1141	0.0836	0.1383	0.0622	0.0822	0.0287	0.0597	0.1245	0.0511	0.054	0.195	0.3215	0.1275	0.1979	0.0865	0.0955	0.0741	0.028	0.0618	0.0913	0.1206	0.0292	0.2888	0.0344	0.0267	0.0782	0.0709	0.0263	0.0881	0.0511	0.046	0.0268	0.0983	0.0589	0.0508	0.0576	0.0401	0.0531	0.1722	0.0365
CA5BP1	3.6977	2.9951	3.9879	1.7086	3.0323	3.0856	1.0132	2.614	3.1851	2.8398	3.734	4.5568	2.4768	4.1184	2.8697	0.9301	3.5308	6.4059	1.8088	3.9018	3.1978	2.8742	3.9848	2.7874	2.2344	2.7375	3.2684	4.7279	3.3827	4.2787	2.2452	2.953	3.9175	3.541	2.2511	3.3079	2.2706	3.2836	5.032	2.0382	1.2572	1.6904	3.5098	4.7955	3.2088	3.4591	2.0658	2.5588	0.9878
APOH	0.009	0.0265	0	0	0.1033	0.028	0	0.0195	0.0132	0	0.025	0.0081	0	0	0	0.0123	0	0.1441	0.0127	0.0458	0	0	0.0088	0.061	0	0.0174	0	0.0554	0	0.0259	0	0.0128	0	0.0439	0	0.0194	0	0.0091	0	0	0.1467	0.0735	0.3271	0	0.0105	0	0	0	0
PABPC1P4	0.1403	0.1882	0.2043	0.1191	0.0807	0.3279	0.6625	0.2706	0.2728	0.5716	0.2932	0.1963	0.2013	0.2357	0.225	0.3402	0.3595	0.0938	0.2072	0.5599	1.3382	0.36	0.2313	0.1661	0.1364	0.3276	0.2369	0.6888	0.0485	0.2268	0.123	0.1733	0.1541	0.3054	0.2131	0.3657	0.1126	0.2508	0.1269	0.0739	0.0417	0.1462	0.1893	0.3475	0.202	0.2638	0.2605	0.1426	0.064
RNU6-250P	0	0.1713	0	0	0	0	0	0	0	0	0	0	0	0	0	0	0	0	0	0	0.2137	0	0.1138	0	0	0	0	0	0	0	0	0	0	0	0	0	0	0	0	0	0	0	0	0	0	0	0	0	0
AC116407.2	1.4181	1.1898	0.5523	0.438	0.4319	0.2816	3.3195	0.8623	0.5128	1.0177	0.6973	0.6672	0.3902	0.9899	0.2297	0.5705	0.4665	1.4504	0.3928	4.6557	3.3526	1.7997	0.1908	3.967	0.338	0.566	1.2646	0.4148	0.2538	0.3875	0.2086	3.8575	4.442	4.5383	0.1659	0.9176	0.4687	0.1262	0.2767	1.0687	3.1355	1.6163	1.0132	0.2587	0.5873	0.6903	0.2028	0.256	0.3953
KRT8P7	0.0417	0	0	0	0	0	0	0	0.0616	0	0	0	0	0	0	0	0	0	0	0	0	0.0081	0	0	0.0162	0.0081	0.0107	0	0	0.016	0.009	0.0119	0.0088	0	0	0	0.0134	0.0337	0	0.0088	0	0	0	0	0	0	0	0	0
RNU6-337P	0	0	0	0	0.2596	0	0	0	0	0	0	0	0	0	0	0	0	0	0	0	0	0	0	0	0	0	0	0	0	0	0	0	0	0	0	0	0	0	0	0	0	0	0	0	0	0	0	0	0
RPL27AP	0.1649	0.1217	0.2113	0.0962	0.0316	0.0428	1.4027	0.1196	0.0405	0.1232	0.3064	0.3235	0.0964	0.1129	0.2064	0.1504	0.2583	0.2206	0	0.1403	0.253	0.107	0.1347	0.3735	0	0.1599	0.0352	0.311	0.0418	0.1321	0.0884	0	0.5778	0.2418	0.0656	0.1784	0.0882	0.2495	0.2253	0.0579	0.1797	1.0351	1.3725	0.2192	0.0645	0.3285	0.1069	0.1084	3.0341
OR1L6	0.0229	0	0	0	0	0	0.0209	0.0125	0	0	0	0.0415	0	0	0	0	0	0	0	0.0117	0.0211	0	0.0225	0	0	0	0	0	0	0	0	0	0	0.0112	0.0137	0.0248	0	0	0	0.0121	0	0	0	0	0	0.0211	0	0	0
NF1P7	0	0	0	0.0274	0.009	0	0.0285	0	0	0	0	0	0	0	0	0	0	0	0	0	0	0	0.0077	0.0265	0	0	0	0.008	0	0	0	0	0	0	0	0	0	0	0	0	0	0	0	0	0	0	0	0	0
ZNF222	0.5492	1.5413	1.6829	1.0936	1.5934	1.2184	0.8051	1.3705	1.409	1.507	1.0312	1.5187	1.5339	1.741	1.7167	1.3064	1.0336	1.4371	1.7201	1.5236	1.7032	2.2484	1.615	1.2369	1.6948	1.0936	1.476	2.0264	1.1351	1.744	1.3118	1.9977	0.6274	1.7093	1.6245	1.2982	1.2648	1.0656	2.2433	1.7097	1.4145	2.0037	1.16	1.0869	2.3324	2.2942	1.3235	1.7428	1.1681
AC104058.1	0	0	0.0516	0.047	0.1853	0.0627	0	0	0	0.1203	0	0.0729	0.0353	0	0.0302	0.0551	0	0	0	0.2055	0	0.0392	0.0395	0	0.0783	0	0	0	0	0.0387	0	0.1152	0.1269	0	0.0481	0.0871	0	0	0	0.0848	0	0	0.1087	0	0	0.037	0.1174	0.0529	0
HIST1H1T	0	0.0246	0	0	0.0192	0	0	0.0181	0	0	0.0464	0.0302	0	0	0.025	0.0228	0	0	0.0235	0	0.0307	0.0486	0.0163	0.0377	0.0486	0.0161	0	0.0171	0.0253	0.016	0	0	0	0.0651	0.0398	0	0.0267	0.0504	0.039	0	0	0	0	0	0.0586	0	0	0	0
AC127537.1	0.9578	0.9421	0.4705	0.3726	0.4775	0.7462	0.2909	0.5732	0.942	0.8585	0.3336	0.9539	0.602	0.765	0.4914	0.1528	0.5785	0.6832	0.7216	1.1083	0.7934	0.404	0.3756	0.5061	0.5277	0.6963	0.8794	0.5255	0.5586	0.7978	0.3594	1.0046	1.1576	1.1545	0.3239	1.2781	0.6406	0.0483	0.4298	0.8909	0.4696	0.7057	0.754	0.5304	0.3746	0.6898	0.4191	0.6928	0
AC079203.1	0.296	1.3537	0.3793	0.1727	0.2724	0.1844	0.8631	0.0322	0.3929	0.3095	0.2062	0.7771	0.1817	0.2431	0.1556	0.3239	0.7945	0.9896	0.5017	1.1784	0.4903	0.3168	0.4062	0.2681	0.2302	0.1721	0.1517	0.2436	0.1351	0.1422	0.1269	0.2963	0.5288	1.0123	0.1766	0.0961	0.095	0.1194	0.4158	0.2181	0.532	0.2908	1.7574	0.118	0.0695	0.0544	0.0863	0.7785	0.0495
RNA5SP356	0	0	0	0	0	0	0	0	0	0	0	0	0	0	0	0	0	0	0	0	0	0	0	0	0	0	0	0	0	0	0	0	0	0	0	0	0	0	0	0	0	0	0.1717	0	0	0	0	0	0
RPS27AP18	0	0	0	0.1824	0.03	0.0812	0.3323	0.0567	0	0	0.1089	0	0	0	0	0	0	0.0348	0	0	0	0	0.0766	0.2065	0	0.0505	0	0	0	0	0.0279	0	0.0821	0.1018	0.0311	0	0	0.0525	0.0305	0	0.0426	0.2986	1.6522	0.1039	0	0.024	0	0.0343	0.0871
AC060834.2	0	0	0	0	0.0445	0	0.0353	0	0	0	0	0	0	0	0	0	0	0	0	0	0	0	0	0	0	0	0	0.0199	1.5599	0	0	0	0	0.0189	0	0	0	0	0.0227	0	0	0.0317	0.0522	0.0514	0	0	0.0188	0	0
AC005833.1	0	0.0149	0.1679	0.0118	0	0.0157	0.0184	0.0658	0.0297	0	0	0.0183	0	0	0.0681	0	0.0271	0	0.0427	0	0	0.0098	0.0198	0.0457	0.0588	0.0293	0.0517	0.0726	0.0153	0.0291	0	0	0.0212	0.0296	0.2286	0.0109	0.0324	0.0102	0.0354	0	0.033	0.033	0	0	0.0237	0.0185	0.1275	0.0265	0.0169
PPIAP47	0.0483	0.2851	0.1548	0	0.0834	0.2258	0.044	0.0526	0.1425	0	0.0337	0.0656	0.0424	0.0661	0.0544	0.033	0.1621	0.1938	0.1365	0.3699	0.1779	0.0705	0.0474	0.2735	0.2349	0.0234	0.1238	0.1739	0.0367	0.1857	0.0518	0.0345	0.3046	0.0472	0	0.0261	0.0388	0	0.0848	0	0.1974	0.0396	0.9453	0.0963	0.0567	0.1333	0.2584	0.0318	0.0808
AC007224.1	0	0.1225	0	0	0.4777	0	0	0	0	0	0.4627	0.2255	0.1456	0.5685	0.187	0	0	0	0.3519	0.6782	0.7642	0.3232	0.407	0.282	0.2422	0.3219	0	0.3417	0	0.1596	0.089	0.2375	0.0873	0	0.0991	0.0898	0.1333	0.0837	0.0972	0.2623	0.4071	0.136	0.6723	0.3311	0	0.3054	0.1615	0	0
AC004801.6	0.7702	0.6313	1.222	0.4423	0.633	0.4572	0.713	0.4656	2.6152	1.2236	1.3796	0.5867	0.3753	1.1216	1.5514	0.2843	0.2626	0.9811	0.7599	0.5742	1.1703	0.7734	0.6112	1.0244	0.63	0.7466	0.7831	0.654	1.1531	0.5052	0.7208	0.7868	1.2592	1.4935	0.9339	1.0846	0.5102	0.4809	0.7156	0.7466	0.3197	0.4804	0.7754	0.7799	0.4734	0.7869	1.0938	0.7718	0.0818
CCNDBP1	5.1536	2.9296	4.5132	7.0602	3.0226	3.9532	2.9672	4.0201	3.7218	2.4615	3.6626	3.2913	4.1604	5.5211	2.3099	3.8761	3.8493	3.6795	2.9672	8.2188	6.5361	3.865	4.7964	4.5758	3.3406	2.6493	5.5319	3.4659	3.5045	4.5677	5.7882	6.7743	4.5306	6.5645	3.5431	3.898	4.4736	4.0811	4.6533	3.0255	4.2874	5.0107	4.7772	3.8855	4.1556	3.8925	2.581	4.1734	4.9137
CAPS	2.6544	1.757	2.1176	0.5483	1.3048	2.133	0.4134	1.3486	1.7448	2.9729	0.6734	1.9045	1.5535	3.139	1.3057	3.1247	2.3631	2.1886	1.7279	4.4329	3.0917	2.9566	1.1567	1.9629	1.0791	1.3977	2.4804	1.55	1.3186	2.7066	1.3749	2.8385	3.1075	3.1509	1.0539	2.2729	1.0229	0.4956	1.0811	2.3713	1.946	1.0788	1.4321	3.8255	1.5905	1.9713	1.3602	2.1876	0.3387
TUBB2BP1	0.0686	0.0608	0.1231	0	0.3159	0.1711	0.025	0.1344	0.0203	0	0.0574	0.0621	0.0482	0.1128	0.1134	0.0188	0.129	0	0.0582	0.028	0.0253	0.0802	0.0942	0.0311	0.0133	0.1198	0.0703	0.2824	0.0626	0.0528	0.0441	0.0393	0	0.0268	0.0328	0.0446	0.2644	0.0415	0.1286	0.1156	0.2019	0.0225	0.0556	0.0182	0.2094	0	0.1068	0.0722	0.023
AL390728.5	0.0339	0.4498	0.1085	0.0593	0.0779	0.0528	0	0.0369	0.025	0	0	0.0307	0.0149	0.0232	0.0127	0.0463	0	0.0453	0.0478	0.0346	0.0624	0.033	0.0166	0.0575	0.2305	0.0328	0.6943	0.0174	0	0.1628	0.0182	0.218	0	0.0331	0.1213	0.0366	0.1087	0	0.0793	0.1248	0.0554	0.1109	0	0.0225	0	0.0467	0.0823	0.0445	0.0283
DTD1	5.5204	7.9966	7.3594	1.9573	9.7069	6.7265	6.4349	5.8506	11.4079	7.8657	10.0729	6.7771	11.1255	8.862	10.0351	9.2115	7.8627	4.9671	3.6478	9.7723	8.2842	6.3481	8.6682	2.0944	3.363	7.0501	7.8868	8.4203	8.4472	7.4213	10.2412	6.0357	5.7452	6.6869	7.3349	8.5919	10.9366	4.4082	8.7292	9.2808	11.5103	9.3331	7.7843	6.5109	10.7758	12.3342	5.7736	10.0849	4.3791
AL583835.2	0	0	0	0	0	0.0145	0	0	0	0	0	0	0	0	0.014	0	0	0	0.0132	0.019	0	0	0	0	0	0.009	0	0.0096	0.0425	0.0089	0	0.0533	0	0	0.0111	0.0302	0.0149	0.0188	0	0	0	0	0	0	0	0.0171	0	0	0
LINC01151	0.0209	0	0	0	0	0	0	0	0.0927	0	0	0	0	0	0	0	0	0	0	0.1283	0.2313	0	0	0	0	0	0.0268	0.0215	0	0	0	0.0898	1.2104	0.0205	0	0	0	0	0.0245	0.022	0.0342	0.0343	0	0	0	0.0578	0.0407	0	0
IGLC4	0	0	0	0	0	0	0	0	0	0	0	0	0	0	0	0	0	0	0.0681	0	0	0	0	0	0	0	0	0	0	0	0	0	0	0	0	0	0	0	0	0	0	0	0	0	0	0	0	0	0
PPIAP38	0	0	0	0	0	0	0	0	0	0	0	0	0	0	0	0	0	0	0	0	0	0	0.0243	0	0.0241	0	0	0.0255	0	0	0	0.0354	0	0	0	0	0	0	0	0	0	0	0.0668	0	0	0	0	0	0
AC105416.1	0	0.021	0	0	0.0163	0	0	0	0	0	0	0	0	0.0194	0	0	0	0.019	0	0	0	0	0	0	0	0	0	0.0292	0	0	0.0152	0	0	0	0.0169	0	0	0	0.0166	0	0	0	0	0.0189	0	0	0.0138	0	0
MTND2P24	0	0	0	0	0	0	0.027	0	0	0	0	0	0	0	0	0	0	0	0	0	0	0	0	0	0	0	0	0.0153	0	0	0	0	0	0.0145	0	0	0	0	0.0174	0	0	0	0.02	0	0	0	0.0144	0	0
RNU7-30P	0	0.2845	0.7414	0	0.2219	0	0	0.2098	0.2845	0	0	0.3492	0	0	0.2896	0	0.5177	0.5159	0.2724	0.1969	0	0.3754	0.7562	0.4367	0.5625	0	0.2471	0.1984	0	0.1853	0	0	0.2027	0	0	0	0	0	0.2258	0	0	0	1.041	0.2563	0.2263	0	0.1875	0	0
AC007000.1	0.3765	1.0443	0.5789	0.4393	0.3638	0.3285	4.8305	0.4096	1.0441	0.9223	0.6294	0.7499	0.6603	0.8454	0.848	0.5355	0.7681	1.712	1.2337	0.8302	1.1088	0.425	0.3248	0.682	0.3953	0.759	0.8682	0.7591	0.3894	0.5934	0.5004	0.3015	2.2632	1.2951	0.4673	0.5051	0.3626	0.6227	0.9696	0.7453	0.9352	3.1068	0.9755	0.7805	0.7421	0.5538	0.41	0.5545	3.6771
RF00096	0	0	0	0.1049	0.1034	0.2801	0	0.0978	0	0	0	0	0	0	0.2025	0	0	0	0.508	0	0	0.2625	0.1763	0	0	0.0871	0	0.0925	0	0	0	0.1286	0	0.0879	0.1073	0.0973	0	0.0907	0.3157	0.0947	0	0	0	0	0	0	0.1748	0.2365	0
AL158071.2	0.4841	0.8442	0.3948	0.5992	0.135	0.1371	1.3102	0.0958	0.1948	0.6794	0.3066	0.5446	0.1158	0.7834	0.2313	0.2809	0.2954	0.4905	0.746	0.5841	0.7292	0.3998	0.2157	0.1993	0.4707	0.4266	0.3759	0.2717	0.1562	0.1128	0.0157	0.3987	0.5088	1.2044	0.3327	0.3492	0.0471	0.1923	0.2748	0.4171	0.4555	0.2642	0.1584	0.3315	0.1377	0.0809	0.1712	0.3473	0
ART1	0	0.012	0	2.9865	0.0094	0	0	0.0266	0	0	0.4088	0	0	0	0	0.0111	0.0109	0.218	0	0.0083	0.03	0.0159	0	0.0092	0.0158	0.0316	0	0.0168	0.0124	0	0	0.0583	0	0	0	0.0265	0	0.074	0	0.0086	0	0.0133	0.099	0	0.0287	0	0.0317	0	0
TLL2	1.6151	0.1926	0.9399	0.404	0.7983	0.3154	0.4946	3.8117	0.2835	0.1161	0.9646	0.3307	0.2161	0.1506	1.151	0.0461	0.1949	0.6984	0.1741	0.4852	2.7894	0.2256	0.4228	0.47	0.1797	2.1656	0.5469	0.6247	0.4776	0.2256	0.4717	1.1623	0.5026	1.5684	0.2013	1.7918	0.146	0.7367	0.5822	0.1637	0.6904	1.309	0.2138	0.2398	1.2857	1.2826	0.2839	0.3704	0.1202
GABRG1	0	0	0.0023	0.0391	0.0081	0.0439	0.0514	0	0	0.0948	0.0025	0	0	0	0.0013	0.0313	0.0189	0	0.3211	0.0108	0.013	0	0.0017	0.008	0.0565	0.0034	0	0.0036	0.0992	0.066	0	0.0076	0	0.0017	0.0252	0.0095	0	0.0427	0	0.141	0	0.0115	0.0071	0.1288	0.0041	0.0113	0.0017	0	0.1356
AL079303.1	0.0503	0.1418	0	0	0.2316	0	0.1668	0.01	0.027	0	0	0.0041	0	0	0.0172	0	0	0	0	0	0	0.0267	0.8523	0	0	0.0976	0	0.1177	0.007	0.0264	0	0.0065	0	0	0	0.2079	0	0.0277	0	0	0.8076	0.2547	0	0.0122	0.0376	0.0042	0	0	0
AC023200.1	0	0.0271	0	0	0	0	0	0	0	0	0	0	0	0	0	0	0.0493	0.0246	0	0.0188	0	0.0179	0	0	0	0.0712	0	0	0	0	0	0	0	0.0359	0	0	0	0.037	0	0.058	0.03	0	0	0	0	0.0338	0	0	0
AC084125.2	0.0782	0.292	0.1158	0.0969	0.1124	0.2741	0.0846	0.101	0.191	0.0912	0.1021	0.0752	0.2036	0.174	0.1192	0.2506	0.1017	0.1046	0.1242	0.6685	0.3148	0.1712	0.3281	0.1162	0.1188	0.2866	0.1002	0.3317	0.1264	0.1033	0.0733	0.1572	0.2028	0.0788	0.2391	0.2062	0.1137	0.0542	0.1401	0.0746	0.1078	0.064	0.1978	0.1039	0.2007	0.2336	0.1544	0.2281	0.0082
STAM	8.3211	10.7826	10.3042	12.9296	12.9556	12.1785	9.5198	11.327	4.657	11.3519	10.5511	8.7713	10.4086	10.8488	12.2112	11.1954	7.3963	9.5329	13.1796	9.1158	10.2726	11.024	12.9881	8.867	10.9595	9.2978	10.6934	13.0993	11.8573	12.9034	10.59	11.6636	2.6635	11.3254	16.2231	12.0038	11.9199	9.3057	13.6873	11.7367	10.3298	12.2075	15.2807	6.462	12.3004	6.2926	11.4806	12.4064	5.5692
RN7SL864P	0.042	0.1238	0.1075	0.049	0.0483	0	0	0.0457	0	0.1253	0	0.114	0	0.1723	0.0315	0.0574	0.0563	0	0.1778	0.0857	0	0.2042	0	0	0.1224	0.122	0	0.0432	0.0638	0	0.045	0	0	1.7221	0	0.0454	0	0	0.0982	0.0884	0	0	0.0566	0	0	0.1157	0	0.0552	0
AC133561.1	0.0149	0	0.0063	0.0116	0.0114	0	0.0902	0	0.0657	0.1627	0	0	0.0043	0	0.0074	0.1016	0.2127	0	0.014	0	0.0091	0	0.0388	0	0.0048	0	0	0.0153	0	0.0095	0.0053	0	0.0468	0.0387	0	0.0107	0	0.1448	0	0	0.0081	0.1054	0.02	0	0.0116	0.0501	0.0048	0.0065	0
GGNBP1	0.0551	0.1422	0.0441	0.0562	0.0634	0.0536	0.0878	0.015	0.0508	0.0823	0.0096	0.0062	0.0362	0.0566	0.0413	0.0659	0.0832	0.0368	0.1167	0.1546	0.0887	0.0469	0.027	0.0935	0.0669	0.0667	0.0529	0.0354	0.0419	0.0595	0	0.0788	0.1736	0.1144	0.0657	0.1043	0.0221	0.0347	0.0645	0.1087	0.0337	0.0113	0.065	0.1098	0.0565	0.0316	0.0469	0.0543	0
ZBTB11	2.8892	6.7891	5.3552	2.8504	5.9137	7.4432	6.7498	5.3754	5.53	4.8796	3.8568	3.9604	4.4512	6.051	4.0326	4.8539	4.9708	4.4852	6.9166	4.548	6.1494	5.1265	6.5953	4.2371	5.8019	5.2074	6.5746	6.047	5.8203	5.3488	4.7562	6.1036	5.3308	6.2413	8.3286	5.5716	5.7168	3.7024	5.0717	7.7805	7.5383	6.122	5.2458	5.359	5.9363	5.1143	6.9097	6.9019	5.6653
AC084880.2	0	0	0	0	0.0275	0	0	0	0	0	0	0	0	0	0	0	0	0	0	0	0	0.0232	0	0.027	0	0	0	0	0	0	0	0	0	0	0	0	0	0	0	0	0	0	0	0	0	0	0	0	0
FP325332.1	0.0409	0.0949	0.0599	0.0341	0.0269	0.0455	0	0.0445	0.0173	0.0437	0.0163	0.09	0.0359	0.008	0	0.048	0.0549	0.0547	0.0578	0.2507	0.2153	0.0285	0.0688	0.0397	0.0739	0.0113	0.0075	0.0421	0	0.0337	0.0188	0.092	0.0922	0.0057	0.0907	0.0316	0	0	0.0479	0.1231	0.0382	0.067	0.0789	0.0233	0.0206	0.0484	0.0284	0.0923	0.0098
AC011825.4	0.4297	0.5967	0.162	0.1475	0.1454	0.1182	0.5989	0.1375	0.3356	0.2266	0.0704	0.3662	0.1774	0.5192	0.1518	0.242	0.1018	0.2029	0.3214	0.7226	0.2792	0.1722	0.1487	0.3721	0.1966	0.147	0.5505	0.156	0.0769	0.0729	0.1897	0.1446	0.5845	0.1729	0.3017	0.2461	0.1217	0.051	0.2367	0.0799	0.2066	0.1656	0.6823	0.3024	0.1186	0.1859	0.0983	0.0665	0.1691
TMEM132D-AS1	0	0	0.0202	0	0.0242	0	0.0096	0.0115	0	0	0.0293	0.0334	0.0046	0.0577	0.0198	0	0.0283	0.0141	0.0074	0	0.0194	0.0102	0.031	0.0179	0	0	0.0067	0.0433	0.008	0.0051	0	0.0602	0.0221	0.0154	0	0.0057	0.0169	0.0159	0.0062	0.0055	0	0	0.0355	0	0	0	0	0.0138	0.0088
IL17RC	4.1375	2.277	3.1791	1.3584	3.1907	3.0816	1.1616	3.4188	2.7585	3.1002	1.2512	1.5976	2.3813	3.7142	1.7976	2.5253	3.3758	2.7052	1.9456	4.1515	6.2636	2.0916	2.8605	1.8697	1.6235	2.2746	2.2505	3.6791	2.5762	4.5053	3.0631	4.6894	1.5943	2.2907	1.6	4.22	2.0376	1.3891	2.8736	2.432	1.3514	1.9362	2.5128	1.4001	1.9375	2.4191	1.739	2.0886	0.2687
RNU7-124P	0	0.2845	0.2471	0	0	0	0	0	0.569	0	0	0.1746	0	0	0	0	0	0	0	0.3938	0	0	0	0.2184	0	0.3739	0.2471	0.1984	0.2934	0	0	0	0.2027	0	0.2302	0.2087	0.3096	0	0	0	0.6303	0	0	0	0	0	0	0.2536	0
MIR5197	0	0	0	0	0	0	0	0	0	0	0	0	0	0	0	0	0	0	0	0	0	0	0	0.1209	0	0	0	0	0	0	0	0	0	0	0	0	0	0	0	0	0	0	0	0	0	0	0	0	0
IBSP	0.232	0.0228	0.0396	0	0.0712	0	0.296	0	0	0.0347	0	0.007	0	0.0106	0.2091	0.0212	0	0	0	0.0316	0.0997	0.0376	0.0076	0.0088	0.0978	0.1349	0	0.1114	0.0118	0	0.0746	0.0442	0	1.2471	28.016	0.0084	0	0.0234	0	0.057	0.0253	0	0.0104	0.0206	3.4937	0.0142	0	0.0102	0
AC016769.3	0.038	0.224	0.1459	0	0.1747	0	0.0692	0.0826	0.168	0	0	0.378	0.1664	0.3118	0.0285	0.0519	0.5604	0.1523	0.0536	0.1938	0.1397	0.0369	0.1488	0.1719	0.1107	0.184	0.0486	0	0	0.073	0.1221	0	0.3191	0	0.1359	0.1232	0	0	0.3555	0.1199	0.062	0	2.9198	0.1009	0	0	0.1846	0	0
AL590808.1	0	0	0	0	0	0	0	0	0	0	0	0.0768	0	0	0	0	0	0	0	0	0	0	0.0831	0	0	0	0	0	0	0	0	0	0	0	0	0	0	0	0	0	0	0	0.1144	0	0	0	0	0	0
LINC02111	0	0	0.0066	0	0.0357	0	0.0566	0.0169	0	0.0077	0.0144	0	0	0	0	0	0	0.0069	0.0073	0	0	0	0.0101	0.0351	0	0.01	0	0.0106	0	0.005	0.0055	0	0	0.0202	0	0.0112	0	0.0156	0.0061	0	0	0.0085	0.007	0	0.0061	0	0	0	0
RPS12P18	0	0	0	0.0517	0	0	0.2421	0	0.1307	0.1323	0.1234	0	0	0	0	0.0606	0	0.0592	0	0.0904	0.163	0	0.0434	0	0	0	0.0567	0.0911	0	0.0426	0.0475	0	0.0465	0.0433	0	0.0479	0	0.0893	0	0	0.2171	0.145	0.0598	0	0	0	0	0	0.4444
AC234772.1	0	0	0	0.0149	0	0.0199	0	0	0	0	0.0178	0	0	0	0	0	0	0	0	0	0	0	0	0	0	0	0	0.0131	0	0	0	0	0	0	0	0	0	0	0	0.0134	0	0	0.1205	0	0	0	0	0.0168	0
HSPA6	0.2068	69.3223	0.1422	0.4472	0.4119	0.275	47.2607	0.2853	0.1339	0.1883	0.6885	22.7153	3.5823	0.725	0.7346	0.9519	21.5717	0.4317	3.5261	0.139	0.557	0.5055	0.5289	3.6258	0.3236	0.352	0.1809	0.4721	0.5984	11.9223	0.2216	0.2669	1.7066	0.207	1.3001	0.1419	0.089	63.8112	1.8243	1.4602	0.3214	0.1486	16.0948	0.7506	3.1064	0.1113	0.3286	0.1658	0.2362
AC044860.3	0	0.0479	0.0833	0.4171	0.2991	0	0.0592	0.3182	0	0.0971	0	0	0	0.2224	0.1708	0	0	0	0	0	0	0.0316	0.0318	0	0	0.0315	0	0.2005	0.0494	0	0.0348	0	0	0	0	0	0	0.1966	0	0	0.0531	0.1064	0.0438	0	0.0762	0.0597	0.0316	0.1709	0
RNU7-82P	0	0	0	0	0	0	0	0	0	0	0	0	0	0	0	0	0	0	0	0	0	0	0	0.2184	0	0	0	0	0	0	0	0	0	0	0	0	0	0	0	0	0	0	0	0	0	0	0	0	0
RNVU1-19	0.6444	0.1056	0.2752	0	0.7414	0.3347	0.3915	0.0779	0	0.5348	0.6982	0.1945	0.1256	0	1.129	8.6181	0.2883	0.0958	0.3034	1.0964	0	3.6932	0	0.1621	0.1392	0.2082	0.2752	0.8102	0	0.4817	0.4605	0.8192	0.602	2.1691	0.6836	1.007	1.9537	0	2.0955	4.5987	0.702	0.3517	1.4493	0.4758	0	0.395	0.2785	0.9416	1.3172
TBC1D9	7.6802	5.0093	7.6212	4.826	12.61	7.4344	4.9901	7.2495	3.4378	5.1803	3.642	5.4447	5.1598	5.4815	2.9419	3.8355	6.9172	8.9334	3.5781	6.1896	7.2711	7.5558	7.5035	4.0448	5.6956	6.2698	3.5623	5.5231	10.028	5.968	6.2129	6.0582	1.5498	5.1075	5.2698	9.7733	8.3648	2.6902	6.4405	4.6536	10.8912	12.5755	3.8532	1.1061	5.8816	6.9693	4.3248	6.629	3.5405
AC068587.2	3.0213	1.1381	1.2356	0.15	2.3667	3.5055	0.703	0.9093	3.6037	3.073	0.9852	2.7355	1.5222	6.4254	1.9307	3.7809	1.1217	1.1177	2.7241	3.2815	4.7333	2.2523	0.6932	1.6013	1.5001	3.2402	1.5647	0.3306	1.1735	4.4481	1.3093	2.2065	1.6214	3.1412	1.8414	3.5471	0.5159	0.2593	1.2794	3.249	1.3657	0.5263	2.6893	2.1358	0.9051	1.8322	1.3753	2.2826	0
DNAAF5	4.5401	4.516	5.951	10.3379	6.4822	6.6483	10.6991	6.1014	5.4941	6.1666	8.5659	5.9294	6.7174	6.7922	7.4181	3.1394	6.7954	5.4807	2.0068	4.028	3.4231	5.8764	7.7728	4.103	5.3999	6.9602	5.9452	8.0551	5.7598	8.0374	4.6117	5.9445	1.8118	4.0294	7.4885	4.691	6.7551	4.9318	5.8604	3.5687	6.2642	3.7115	12.9954	5.5863	4.639	5.154	6.7236	6.6495	3.0485
AC135178.3	0.4161	1.5787	0.5767	0.9315	0.4787	0.4631	0.1083	0.5914	0.5262	0.7611	0.4141	0.5305	0.3724	0.6395	0.2678	0.4065	0.3875	0.5906	0.5398	1.0144	0.8754	0.5042	0.6493	0.3846	0.4459	0.5104	0.5331	0.6377	0.2196	0.4733	0.3004	0.7409	0.1696	0.3486	0.3953	0.8269	0.2454	0.0685	0.5269	0.465	0.3747	0.1808	0.9397	0.237	0.5779	0.4529	0.3056	0.5919	0
RPSAP76	0.028	0.0207	0	0.0327	0.0645	0.0218	0.1277	0.1068	0.0827	0.0209	0.0781	0.0381	0.0615	0.0576	0.0632	0.0192	0.0376	0.0187	0.0396	0.0143	0.0258	0.0819	0.0412	0.1428	0.0273	0.0815	0.0359	0.0721	0.0213	0.0404	0.015	0.02	0.0442	0.0137	0.0335	0.0758	0.0225	0.0141	0	0.0738	0.1374	0.0459	0.3405	0.0186	0.0164	0.0387	0.0682	0	0.2579
CD101	2.5332	1.765	1.489	1.4324	1.0098	0.584	0.501	1.4581	1.3363	0.4573	1.2054	0.69	0.6191	1.4284	1.3884	0.7092	0.3983	1.6084	0.9618	0.6442	0.8222	0.8907	1.1972	1.3404	0.6438	2.1315	1.1765	1.0314	0.8458	0.7144	0.9174	0.6299	0.5876	0.7174	1.152	0.757	0.5716	1.7514	1.0568	1.0886	0.3165	0.9155	0.4763	2.0631	1.0995	1.2952	1.4124	1.6103	0.0679
DSCAM-AS1	0	0	0	0	0	0	0.0246	0	0	0.0101	0.0094	0.0061	0	0	0.0051	0.0092	0	0	0	0.0069	0	0	0	0.0153	0.0066	0	0	0	0	0	0	0	0	0	0.0161	0	0	0	0.0079	0	0.011	0.0221	0.0274	0	0.0079	0.0311	0	0	0.0791
HNRNPL	26.322	50.6425	38.7863	25.1765	33.9347	40.5852	44.498	29.4047	39.4828	41.1279	31.0521	39.0796	28.4682	35.7072	45.2727	45.5709	40.8823	32.5577	44.9041	32.6143	40.5765	32.3109	45.0752	31.7207	36.2541	50.3737	41.9411	38.661	36.8694	31.2838	36.3294	35.3588	31.7333	24.9074	42.7065	37.2578	55.4022	24.2246	49.3093	33.6631	41.4461	36.2883	33.6268	32.4801	41.5775	38.9551	34.9488	41.8446	18.7894
TUBBP1	0.8354	1.5755	1.4428	0.7036	1.2453	0.9168	2.0124	1.3121	0.8895	1.0851	0.9513	1.0392	0.6753	0.8952	1.26	0.7849	1.1505	1.2144	1.0056	0.801	0.7889	0.9756	1.6734	0.8389	0.671	1.9012	1.3401	4.2892	1.0167	1.1379	2.6786	0.5402	0.6108	2.4989	1.6647	1.7369	1.6091	1.3626	2.075	1.2009	0.7835	1.8436	0.9509	0.9847	1.6791	2.7317	1.8296	1.3088	1.6401
RNA5SP74	0	0.3237	0	0	0.1262	0.1709	4.9982	0	0	0	0	0.0993	0	0.6008	0	0.15	0	0.2934	0	0.224	0.4038	0	0	0	0.2133	0.319	0	0.3385	0	0	0	0	0.1153	0	0	0.1187	0.1761	0	0.1284	0	0	0	0	0	0	0	0	0	0.9173
AC068137.2	0	0	0	0	0	0	0	0	0	0	0	0	0	0	0	0	0	0	0	0	0	0	0	0	0.0243	0	0	0	0	0.024	0	0	0	0	0	0	0	0	0	0	0	0	0	0	0	0	0	0	0
HMGN1P7	0	0.1127	0.2448	0	0.0879	0.0595	0	0.2078	0.0564	0.1141	0	0.2767	0.067	0.0523	0.0287	0.2613	0.3589	0.1022	0.1079	0.234	0.1406	0.3718	0.1498	0.2163	0.26	0.1481	0.0489	0.0786	0.1743	0.1836	0.0819	0.9288	0	0.0747	0.2736	0	0.184	0.0771	0	0.0402	0.1873	0	0.5155	0.0508	0.0448	0.0351	0.1857	0.0502	0
RF00019	0	0	0	0	0	0.3802	0	0	0	0	0	0.1105	0.107	0	0	0.1669	0	0	0	0	0	0	0	0	0.2373	0	0	0	0	0.3518	0	0	0	0	0.1456	0	0	0	0	0	0	0.1998	0.4939	0	0	0.1122	0	0	0
PI4KAP2	0.7263	4.6853	1.6646	0.2464	1.051	2.161	1.3704	0.9957	1.2603	1.7613	0.575	1.2949	1.7061	0.9682	0.4481	1.604	2.0979	1.0441	1.3197	3.7124	1.6256	1.1568	1.9947	1.4056	1.7981	1.3879	1.5269	0.9199	1.268	1.7481	0.6671	1.1097	1.3467	0.4206	1.3519	1.3085	1.0169	0.4695	1.4327	1.4133	1.1712	0.9954	1.6235	1.6456	0.6138	1.8975	1.2944	1.6726	0.2649
RNU2-30P	0	0	0.1087	0	0.683	0.1321	0	0	0.8757	0	0	0.1536	0.0744	0.1161	0	0.116	0.1138	0.2268	0.1198	0	0.1561	0.1651	0	0.192	0.0825	0	0	0.1745	0.258	0	0.0909	0.3638	0.1782	0	0	0.0917	0.1361	0	0	0.0893	0	0	0.2289	0	0.199	0.078	0.0825	0	0
LINC02071	0.0139	0	0.0089	0.0243	0	0.0108	0	0	0	0.0415	0.0193	0.0063	0	0.0285	0	0	0.0186	0.0371	0.0294	0.0354	0.0255	0.0068	0.0136	0.0786	0.0067	0.0067	0.0089	0.0143	0	0	0.0223	0.1092	0	0.0068	0	0.0075	0.0111	0.014	0	0.0146	0	0	0.3465	0	0.0081	0.0064	0.0067	0.0091	0
RPL31P41	0	0	0	0	0	0.0501	0	0	0	0	0.0448	0.0291	0	0	0.0241	0	0	0	0	0	0	0	0	0	0.0313	0	0.0412	0	0	0	0	0	0	0	0	0	0	0	0	0	0.0525	0	0.0434	0	0	0	0	0.0423	0
SLC16A14P1	0	0	0	0	0.0123	0	0	0	0	0	0	0	0	0	0	0	0	0	0.0302	0	0	0	0	0.0121	0	0	0	0	0	0	0	0	0	0	0	0	0	0	0	0	0	0	0.0433	0	0	0	0	0	0
DCAF4L2	0.0036	0.0159	0	0.0168	0.0083	0	0	0.0039	0.0106	0.0107	0.005	0.0033	0	0	0.0054	0.0049	0.0048	0	0	0	0	0.07	0	0	0	0.0244	0.0046	0.0037	0.0109	0.0069	0.0039	0	0.0038	0	0.03	0.0078	0	0.0036	0	0	0	0	0.0631	0	0	0	0	0	0
POLD4	3.2588	1.2555	2.201	1.9494	1.7777	1.3564	1.6296	2.189	1.6951	2.1499	2.098	2.3292	2.2871	2.137	1.4399	1.636	1.9738	2.9371	1.2962	2.7625	3.6671	2.6449	1.2147	2.1224	0.755	1.9424	1.8388	1.9807	2.4459	1.9484	1.3788	2.249	2.9138	2.6981	1.2357	2.8469	0.875	4.2277	1.8777	0.6029	1.6598	2.1575	1.6458	1.6365	2.0614	1.6622	0.8809	1.5317	0.4657
AC007040.1	0	0.037	0.0321	0.0293	0.0865	0	0	0.0818	0.037	0.0374	0.0349	0.0227	0.1099	0	0.0565	0.0343	0.0673	0	0	0.0768	0.1384	0.0244	0.1474	0.1135	0.0975	0	0.0321	0.0258	0.0763	0.0964	0.0537	0.1075	0	0	0.1496	0	0.0402	0	0.0587	0	0	0	0.0338	0.0999	0.0882	0.0691	0.0488	0	0
AC124276.1	0.0532	0.0392	0	0.031	0.0153	0.0207	0	0.0289	0	0.0199	0	0	0	0	0.0499	0.0182	0.0179	0	0	0.0272	0.0245	0	0	0.0753	0.0259	0.0258	0	0.0821	0	0.0128	0.0285	0	0.0419	0.013	0	0	0	0.0402	0.0467	0	0.0435	0.0653	0.8795	0	0.0156	0	0	0	0
AL353795.3	0.0042	0.0464	0.0484	0.0367	0.0555	0.049	0.0344	0.0479	0.0619	0.0063	0.076	0.0418	0.0184	0.0546	0.0488	0.0287	0.0028	0.0954	0.0652	0.0514	0.1042	0.0286	0.0617	0.0641	0.0061	0.0366	0.0107	0.0604	0.0191	0.0524	0.036	0.084	0.0639	0.041	0.0425	0.1112	0.0135	0.0296	0.0417	0.0552	0.0274	0.0446	0.0679	0.0251	0.0074	0.0656	0.0714	0.0689	0.014
CD1B	0.0086	0	0.022	0.1	0.0296	0.0534	0	0.0093	0	0.0128	0.0119	0	0	0	0.0064	0	0	0.0344	0	0	0.0158	0.0083	0.0168	0	0.0083	0	0	0.0265	0	0.0082	0	0	0	0	0	0	0	0	0	0.009	0.042	0.1123	0.0116	0	0.0101	0.0079	0	0	0.0143
SYNRG	4.5199	3.7341	6.3275	2.6465	5.2196	6.4381	1.2257	5.0166	5.9316	4.7591	3.379	2.9595	3.1428	4.807	3.4423	4.2213	3.7949	3.218	5.8664	4.5607	5.5283	5.5418	7.203	4.4473	7.8465	4.4584	5.0974	6.0952	5.6975	4.8275	7.8282	6.7302	3.482	3.7511	6.2704	8.2038	3.4521	2.2281	3.7767	7.0009	3.1164	2.6905	4.4733	1.7875	4.0809	5.9907	5.2652	5.7538	0.8698
AL513324.1	0	0	0.0727	0	0	0	0.069	0	0.0279	0.0565	0.2636	0.0171	0	0.0259	0.0426	0	0	0	0	0.0966	0.0697	0	0	0.0214	0	0	0	0.0389	0	0	0	0	0.0596	0.037	0	0.0205	0	0	0	0.0398	0.0928	0	0.2298	0.0251	0	0	0.0368	0.0249	0
AL451069.1	0.3017	0.1113	0.2417	1.4965	0.1736	0.1175	0.6874	0.2873	0.5008	0.169	0.6306	0.5635	0.0496	0.6714	0.3399	0.2838	0.3797	0.2775	0.1332	0.5391	0.0694	0.5506	0.5176	0.1495	0.1834	0.3108	0.2658	0.2328	0.3443	0.3444	0.566	0.0539	0.0595	0.1659	0.2701	0.0408	0.3027	1.0841	0.1325	0.7149	1.3253	0.0926	0.5345	1.0778	0.0885	0.2601	0.6052	0.4961	0.9778
TPTE2P6	0.0263	0.0389	0.0337	0.0384	0.0379	0	0.024	0.0215	0.0097	0.177	0.0092	0.0238	0.0231	0.027	0.0544	0.027	0	0.044	0.0093	0.0471	0.0848	0.0833	0.0581	0.0373	0.0768	0.0638	0	0.1558	0.0501	0.0316	0	0.0942	0	0.0064	0.0079	0.0356	0.0106	0	0.0462	0.0208	0	0.0216	0.0622	0.0175	0.0927	0.0303	0.0192	0.0346	0
AC004707.1	0	0	0.0214	0.039	0.0192	0	0.061	0.0182	0	0	0	0.0454	0.0147	0	0.0251	0	0	0	0	0.0171	0.0308	0.0163	0	0.0189	0	0	0	0.4817	0	0.0482	0	0	0	0.0163	0.02	0.0181	0	0.0337	0.0392	0	0.082	0	0	0	0.1962	0	0.0325	0	0
AP006216.2	0	0	0	0	0.0413	0	0	0	0	0	0	0	0	0	0	0	0	0	0	0	0	0	0	0	0	0	0	0	0	0	0.0385	0	0	0	0	0	0	0	0	0	0	0	0.0485	0	0	0	0	0	0
DYM	10.6319	16.9167	10.3785	11.0356	8.1675	13.5099	3.4568	16.8817	15.3685	6.4298	7.7321	9.9872	12.4024	10.3157	9.0584	26.1167	12.3659	8.1655	16.3122	8.7095	8.1384	7.7398	11.4913	13.2061	15.6648	9.9416	13.5828	11.1725	9.0897	9.7283	8.3409	9.4481	5.121	4.8345	10.4339	11.2712	11.453	9.9079	9.8772	10.874	5.5044	5.9656	14.1409	8.3417	13.656	9.9163	11.8358	9.9581	4.9469
RPL21P132	0.1553	0.3055	0.0332	0.0302	0.0298	0.2823	0.0472	0	0.2673	0	0.4327	0.0234	0.0454	0.1772	0.1166	0.1416	0.0347	0.0692	0.0366	0.2378	0.1429	0.0756	0.1522	0.0586	0.1258	0.2007	0.1989	0.2929	0.1969	0.1244	0.1387	0.037	0	0	0.2162	0.084	0.0831	0.0522	0.0303	0.0273	0.0423	0.2119	0.6636	0	0.0304	0.119	0.1258	0.2383	0.0866
RN7SL91P	0	0	0	0	0	0	0	0	0	0	0	0.0372	0	0	0	0	0	0	0	0	0	0	0	0	0	0	0	0.0423	0	0	0	0	0	0	0	0	0	0	0	0	0	0	0	0	0	0	0	0	0
BLOC1S6	10.0839	11.9827	10.0968	8.5084	12.8559	15.8262	8.5671	9.0015	14.3194	6.3795	8.1627	11.1865	10.3322	13.7206	8.3664	10.1077	9.598	6.2516	13.4927	10.8452	10.8789	11.8881	11.7861	10.3742	12.5268	8.9222	12.8243	12.0686	10.7155	12.8084	12.0662	13.9247	7.5504	9.0179	11.3779	8.654	12.3291	8.7092	10.4983	11.9413	15.5298	8.8117	10.5171	10.9825	10.1059	13.4982	13.7286	11.7775	13.0634
AC016395.1	0.1066	0.2516	0.0819	0.0249	0.0245	0.1992	0.1554	0.0696	0.0943	0.3184	0.0594	0.1737	0.1308	0.1167	0.08	0.2041	0.1144	0.1425	0.0903	0.6528	0.2354	0.083	0.0418	0.2413	0.0829	0.0826	0.1911	0.0438	0.227	0.1843	0.0914	0.1829	0.0224	0.5207	0.2035	0.0922	0	0.0645	0.1996	0.1122	0.2786	0.1396	0.6903	0.1416	0.15	0.098	0.1865	0.1402	0.1069
AC108721.1	0	0	0	0	0	0	0	0	0	0	0	0	0	0	0	0	0	0	0	0	0	0	0	0.0389	0	0	0	0	0	0	0	0	0	0	0	0	0	0	0	0	0	0	0	0	0	0	0	0	0
AC027575.1	0.0435	0.2376	0.1394	0.0305	0.03	0.0203	0.0079	0.071	0.0835	0.0325	0.0121	0.0709	0.0267	0.0834	0.0686	0.0357	0.0643	0.1223	0.1414	0.0755	0.0881	0.0932	0.0341	0.138	0.0804	0.0886	0.0223	0.0403	0.0397	0.0335	0.014	0.0872	0.1144	0.0383	0.0468	0.0283	0.021	0.0395	0.0357	0.0412	0.0427	0.0927	0.2878	0	0.0357	0.08	0.0508	0.0401	0
MIR8060	0	0	0	0	0	0	0	0	0	0	0	0	0	0	0	0	0	0	0	0	0	0	0	0	0	0	0	0	0	0	0	0	0	0	0	0	0	0	0.5525	0	0	0	0	0	0	0	0	0	0
SPPL2A	10.678	6.6956	7.9186	11.3828	8.4425	6.8487	12.729	6.6905	10.0324	5.5291	5.0297	5.3517	4.7241	6.6479	4.6742	5.1189	5.0841	9.5647	7.2585	7.8318	10.4562	8.1933	7.4679	8.0208	9.6728	6.0199	10.1268	7.0576	7.462	9.3787	8.3852	12.5691	6.8046	9.008	7.6244	9.3004	5.4132	7.6609	6.4592	6.3816	12.3324	13.2987	5.4842	8.915	5.428	8.1709	7.3857	7.8644	8.4271
SLC38A1	12.1967	29.7672	31.6885	15.2079	22.2702	36.0551	16.6612	20.3686	37.1925	21.7352	26.059	17.5882	15.8511	12.9844	34.4416	20.3149	18.5291	13.8296	31.3202	17.7847	17.3946	31.3414	36.1897	19.409	25.8121	25.7898	22.7026	23.3161	28.204	25.9168	21.3595	19.2244	18.6404	18.4877	61.2025	13.1521	31.0259	20.1001	19.4711	40.5482	11.3201	10.6187	33.7858	19.8351	19.519	24.886	48.7203	24.2569	7.1942
KC6	2.1605	0.109	2.2746	0.0296	1.4261	0.0252	1.6197	2.2052	0.3167	1.1034	0.849	0.0585	0	1.7414	1.7245	0.9914	1.2548	1.0219	5.4875	0.0047	0.1147	3.3338	3.1859	0.8834	0.0202	2.723	0	0.0119	2.6828	0.0155	0.0049	0.1056	0.0049	1.9987	2.4079	2.1303	0	1.2803	1.1674	0.0292	0.5545	1.0734	4.6663	0.0337	0	1.3689	2.6869	1.6484	0.193
LINC00487	0.0217	0.1442	0.0557	0.0317	0.0437	0.0254	0.1979	0.0295	0	0.1217	0.0605	0.0442	0.0857	0.0595	0.0489	0.0594	0.0073	0.0581	0.1304	0.377	0.1	0.1374	0.0586	0.123	0.0898	0.1105	0.0626	0.2458	0.1156	0.0783	0.1572	0.2252	0.0856	0.4192	0.1102	0.1645	0.0784	0.0274	0.1081	0.08	0.2396	0.0445	0.044	0.0577	0.3313	0.1298	0.0898	0.1	0
RNA5SP299	0	0	0	0	0	0	0	0	0	0	0	0	0	0	0	0	0	0	0	0	0	0	0	0	0	0	0	0	0	0	0.1105	0	0	0	0.2461	0	0	0	0	0	0	0	0.1391	0	0	0	0.2005	0	0
AC243829.3	0	0	0	0	0.3821	0	0	0	0	0	0	0	0	0	0	0	0	0	0	0	0	0	0	0	0	0	0	0.1139	0	0	0	0	0	0	0	0	0	0	0	0	0	0	0.5976	0	0.1299	0	0	0	0
CHEK2P5	0	0	0	0	0	0	0	0	0	0	0	0	0	0	0	0	0	0	0	0	0	0	0.0476	0	0	0	0	0.05	0	0	0	0	0	0.0475	0	0	0	0	0	0	0	0	0	0	0	0	0	0	0
TRPM2	0.2229	0.4578	0.4593	0.4266	0.5355	0.7446	0.247	1.9327	0.1052	0.1465	0.1689	0.3471	0.3003	1.5138	0.1393	0.2415	0.9813	0.3983	0.7859	1.7896	1.4673	0.8175	0.1381	0.844	0.2618	0.1054	0.578	0.1834	0.7867	0.437	0.1147	1.1936	0.268	1.0892	0.0958	0.2682	0.5839	0.5269	0.1858	0.0582	0.3293	0.5256	0.1275	0.9575	0.0983	1.1346	0.3052	0.8208	0.2058
FTLP15	0.1798	0	0.0576	9.7826	0.1551	0	0.041	0.0489	0.0332	0.0671	0.3131	0	0.0394	0.0308	0	0	0	0	0.0317	0	0	0.0219	0	0.0254	0	0	0.0288	0.0462	0.0342	0	0.0241	0	0.0709	0.022	0	0.0243	0	1.3146	0	0.0237	0	0.1104	0	0	0.0527	0	0	0.0296	0.0376
FABP5P14	0	0.0449	0	0	0.035	0.0474	0	0	0	0	0	0.0275	0	0	0.0228	0	0	0.4069	0	0	0	0	0	0	0.0296	0.0885	0	0.0313	0.0926	0.0292	0	0	0	0	0	0	0	0	0	0	0	0	0.0821	0	0.0357	0	0	0.04	0
AL162727.2	0.1816	0.0447	0.1552	0.1766	0.209	0.0472	0	0.0329	0.0893	0.1357	0	0.0822	0.0265	0	0.0682	0.0828	0.0813	0.1619	0	0.4018	0.39	0.1178	0.178	0.1028	0.0294	0.0293	0	0.1557	0.046	0.0873	0.0649	0.0433	0.0954	0	0.1084	0.0328	0.0486	0.1526	0.1417	0.0637	0.0989	0.1983	0.2042	0.0402	0.071	0.3061	0.1177	0.1592	0
MAST4-IT1	0.0545	0	0.0233	0	0.0418	0	0.1656	0	0.0804	0.0271	0	0.0165	0	0	0.0955	0.0249	0.0244	0.0486	0	0.0186	0.0334	0	0	0	0.0177	0.0176	0.0931	0.0187	0	0.0175	0	0	0	0	0.0434	0	0	0.0183	0	0	0	0	0.1226	0.0241	0	0	0.0177	0.0478	0.0304
AC051619.9	0.0401	0	0	0.1636	0	0	0	0.0218	0	0	0.0558	0.0544	0.0527	0	0	0	0	0	0.0283	0	0	0	0.0393	0	0	0.0194	0	0	0.0305	0	0	0	0	0.0196	0	0	0	0	0	0.0211	0	0	0.027	0	0.0235	0.0368	0	0	0
RPL35P8	0	0.0523	0	0	0	0.0553	0.1293	0	0.0523	0	0	0	0.0622	0.0972	0.0266	0.1941	0	0	0	0	0.0653	0	0.0348	0	0.069	0.0344	0.0455	0.0365	0	0.1023	0	0.1015	0	0	0	0	0.057	0	0	0	0.116	0	0.0479	0.0472	0.0416	0	0	0.0467	0.2374
DIAPH2	1.2458	0.6669	1.4969	2.4545	1.8006	2.6842	0.5796	3.2261	0.5633	1.8236	0.6314	1.9588	2.7033	0.876	0.2689	5.0691	1.867	1.5104	2.0444	0.9484	1.4059	2.5114	2.3748	1.5069	1.6872	0.3702	1.7499	1.9615	2.5141	3.7457	1.7098	1.8801	0.1908	0.4858	2.4059	1.1175	3.9028	3.3953	1.8278	1.3302	0.4215	1.2198	0.3818	1.609	1.6394	2.1964	1.6485	1.8985	1.0323
DAOA-AS1	0	0	0	0	0.0055	0	0	0	0	0.0216	0	0	0.0084	0	0	0.0132	0	0	0	0	0	0	0	0.0109	0.0141	0	0	0.0099	0.0073	0.0046	0	0	0	0.0188	0	0	0	0	0	0	0	0.0079	0.0065	0	0	0	0.0094	0	0.0806
MTATP6P16	0	0.8049	0.0291	0	0.1046	0.3542	0.1657	0	0	0.0679	0	0.1029	0.3788	0.3112	0.0171	0.0311	0.1526	0	0.0642	0.3249	0	0	0.8245	0.0257	0.1989	0	0.4659	0.1871	0.5879	0.0655	0.0244	0.5527	0.0239	0	0.0814	0.1722	0	0.1375	0.0266	0.0718	0.2229	0	0.0307	0.2417	0.0533	0.7106	0	0	0
HMGN2P26	0	0	0	0	0.1217	0	0	0	0	0	0	0	0	0	0	0	0	0	0	0	0	0	0	0	0	0.0342	0	0	0	0	0	0	0	0.0345	0	0	0	0	0	0	0	0	0	0	0	0	0	0	0
AC095032.1	0	0	0.024	0	0.0431	0	0	0	0	0.028	0.0783	0.017	0.0164	0.0513	0.0141	0.1025	0.1258	0	0.0529	0.0191	0	0.073	0.0184	0.0424	0.0547	0.0545	0.024	0.0386	0.0285	0.036	0.0402	0.0268	0.0591	0.0549	0	0.0203	0	0	0	0.0789	0	0.0307	0.1012	0.0498	0.088	0	0	0	0.094
RPL5P27	0.0271	0.04	0.0696	0.0158	0.0156	0.0423	0.0989	0.0443	0	0.0608	0	0.0123	0	0	0.0102	0.0186	0.0364	0	0	0	0.025	0	0.0133	0.0154	0.0132	0	0	0.1117	0	0.013	0.0145	0	0.0143	0.0133	0.0162	0	0.0436	0.0274	0.0318	0.0429	0	0.0889	0.0549	0	0.0478	0.0125	0.0264	0.0357	0.2724
AL354809.1	0.2176	0.0803	0.3207	0.5332	0.3255	0.1187	0.694	0.2131	0.305	0.4713	0.6518	0.1182	0.1336	0.2383	0.3431	0.0744	0.1022	0.6548	0.2613	0.1666	0.4606	0.413	0.1493	0.3942	0.2116	0.2637	0.0697	0.2015	0.1986	0.2614	0.2216	0.1089	0.9033	0.7018	0.1428	0.2119	0.0524	0.406	0.2675	1.1227	0.6045	0.1781	1.292	0.4338	0.0638	0.2101	0.2433	0.186	0.2365
RNU2-44P	0	0	0	0	0	0	0	0	0	0	0	0	0	0	0	0	0	0	0	0	0	0	0	0	0	0	0	0	0	0	0	0	0	0	0	0.0667	0	0	0	0	0	0	0	0	0	0	0	0	0
LGALS16	0	0	0	0	0	0.6859	0	0	0	0.0263	0	0	0	0	0	0.0723	0	0	0	0	0	0	0	0	0	0	0	0	0	0	0	0	0	0	0	0	0	0.0178	0	0.0556	0	0	0.0238	0.0936	0.0207	0	0	0	0
ABCA7	0.5902	0.4596	0.5182	0.2985	0.3535	0.1225	0.1328	0.2954	0.2804	0.4398	0.1991	0.7375	0.6379	0.4363	0.6749	0.7017	0.2762	0.9117	0.4986	0.5033	0.6892	1.1182	0.7004	0.8025	1.5256	0.3117	0.4101	0.3675	0.3522	0.5782	1.1382	0.5355	0.4566	0.3785	0.4656	0.8627	0.5207	0.2767	0.266	0.8652	0.1705	0.1053	0.5284	1.4339	0.223	0.8159	0.5336	0.6108	0.0167
AC099811.4	0	0.3201	0.0309	0.0844	0.0832	0.0751	0	0.1049	0.1067	0.1801	0.1343	0.131	0.1057	0.132	0.0724	0.1978	0.453	0.0645	0.2724	0.3692	0.0887	0.1173	0.1654	0.0546	0.0234	0.3038	0.0926	0.248	0.0733	0.0927	0.0258	0.0345	0.076	0.0236	0.1151	0.1826	0.0387	0.0243	0.0564	0.1777	0.0394	0	0.0976	0	0.0849	0	0.0703	0.1585	0
AL136531.2	0.1478	0.5517	0.1114	0.1319	0.08	0.0406	0.1109	0.1135	0.1155	0.0779	0.0606	0.0472	0.1754	0.0833	0.0784	0.4758	0.1867	0.0233	0.1597	0.0888	0.1281	0.0169	0.1193	0.0689	0.0507	0.0759	0	0.0984	0.0794	0.0919	0.0559	0.1368	0	0.0085	0.1245	0.047	0.0419	0.1403	0.0407	0.2289	0.0995	0.1139	0.1408	0.1502	0.1122	0.2479	0.0846	0.0343	0.2327
AL139246.1	0.0263	0	0.0673	0	0.1209	0	0.7184	0.1716	0.0388	0.157	0.8054	0.1665	0	0.1799	0.0789	0.0359	0	0.3866	0	0	0	0.179	0.0258	0	0.0511	0.1528	0	0.027	0	0	0.0563	0	0.2486	0.0257	0	0	0.0422	1.3251	0.0615	0	0.0859	0.0861	0.0709	0.0349	0.0617	0	0.0256	0.0691	0
AC009269.2	0.1267	0.1121	0.0325	0	0.2623	0.0395	0.0923	0	0.0374	0.0378	0.0353	0.1606	0.0444	0.0347	0.019	0.0346	0.068	0.0678	0	0.3104	0.1865	0.0493	0.0248	0.0574	0	0.0982	0.0325	0.0782	0	0.1217	0.0543	0.0362	0.0799	0	0.0907	0.0274	0	0.0255	0.0593	0	0.1656	0	0.547	0.0337	0.0297	0.0699	0	0	0
AC022616.8	0	0	0	0	0	0	0	0	0	0	0	0	0	0	0	0	0	0	0	0	0	0	0	0	0	0	0	0	0	0	0	0	0	0	0	0	0	0	0	0	0	0	0.0638	0	0	0	0	0	0
MIR548AY	0.3352	0.1649	0.716	0	0	0.1741	0.611	0.2432	0.1649	0.3339	0	0.1012	0.196	0.306	0.1678	0.1528	0	0.1495	0	0.2282	1.2342	0.2175	0	0.3796	0	0.4333	0.2863	0.2299	0	0	0.4791	0	1.057	0.7645	0	0.1209	0	0	0	0	0	0	0.1508	0.7426	0.1311	0.2055	0.326	0.147	0
AC008764.1	0	0	0	0	0	0.0073	0	0.0051	0	0	0	0	0	0	0	0	0	0	0	0	0	0	0	0	0.0045	0	0	0.0048	0	0	0	0	0	0	0	0	0	0	0	0	0	0	0.0126	0	0	0	0	0	0
RF01225	0	0	0	0	0	0	0	0	0	0	0	0	0	0	0	0	0	0	0	0	0	0	0	0	0	0	0	0	0	0	0	0	0	0	0	0.1019	0	0	0	0	0	0	0.2541	0	0	0	0	0	0
BCL9P1	0.0467	0.0207	0.0538	0	0.0483	0.0655	0.017	0.0356	0.0207	0.007	0.013	0	0.0082	0.0256	0.0105	0.0064	0.0439	0	0.0198	0.081	0.0086	0.0636	0.0183	0.0106	0.0272	0.0453	0.0239	0.0192	0.0639	0.0045	0	0.0267	0.0245	0.0456	0.0279	0.0404	0.0075	0.0283	0.0055	0.0442	0.0229	0.0153	0.3717	0.0062	0.011	0.0644	0.0045	0.0368	0
LINC01752	0.1092	0.0403	0.035	0.0319	0.0628	0.0851	0.0498	0.0297	1.1276	0.0408	0.0761	0.0989	0.0479	0	0.287	0.0747	0	0.4746	0.1928	0.1115	2.2613	0.0266	0.0268	0.0309	0.0531	0.1058	0.1399	0.3089	0.2492	0.0262	0.1756	0.5856	5.1929	0.1868	0	0.2363	0.0438	0.0826	0.0639	0.0575	1.2937	0.5811	0.221	0	0.3844	0.1255	0.0531	0	0.7761
LINC01924	0	0.0205	0.0089	0	0.008	0	0	0	0	0	0.0193	0	0	0.0951	0.0052	0	0.0373	0.0186	0.0392	0.0567	0	0.0068	0.0068	0.0472	0.0068	0	0.0623	0.0071	0.0106	0	0.0744	0	0.0073	0.0271	0.0083	0.0075	0.0223	0	0	0	0	0	0.1218	0.0092	0	0	0	0	0.0465
AC027419.2	0	0.071	0	0	0.0277	0	0	0	0	0	0	0	0	0	0	0	0	0	0	0	0	0	0	0.0272	0	0	0	0	0.2196	0	0	0	0	0	0	0	0	0	0	0.0253	0.0393	0	0	0.0639	0.0565	0	0	0	0
C7orf61	0.9939	0.6962	0.2959	0.8435	0.566	0.4849	1.1161	0.4588	0.7405	0.4799	1.5525	1.0817	0.5723	0.8523	2.0579	0.3982	0.4581	1.8261	1.2479	0.8712	0.4805	0.3713	0.3051	0.6025	0.5369	1.2262	0.2186	0.6609	0.3665	0.3763	0.0646	0.3159	3.9672	1.5698	0.3115	1.3143	0.2578	0.7998	1.3986	0.74	0.3773	0.3288	1.6258	0.5604	1.225	0.2492	0.3612	0.4753	0.319
AL355143.1	0	0	0	0	0	0	0.0259	0	0	0	0	0	0	0	0	0	0	0	0	0	0	0	0	0	0	0	0	0	0	0	0	0	0	0	0	0	0	0	0	0	0	0	0.0384	0	0	0	0	0	0
SLC47A2	0.034	0.1134	0.0847	0.0146	0.0617	0.1114	0.0065	0.0972	0.0633	0.2269	0.0498	0.1165	0.0674	0.1199	0.0805	0.022	0.0384	0.0884	0.5276	0.1514	0.3553	0.2313	0.0666	0.1679	0.6168	0.1057	0.0572	0.0809	0.0897	0.1288	0.1073	0.2658	0.8038	0.0629	0.0683	0.1218	0.0918	0.018	0.0565	0.3951	0.0613	0.0468	0.2532	0.1021	0.0273	0.1117	0.139	0.1222	0.0209
PTPN3	0.9163	2.9652	4.2738	0.8362	2.7775	4.8032	0.7217	2.3196	3.3654	3.592	1.5166	2.333	1.6902	2.6977	1.2755	3.338	2.8099	3.1407	6.281	4.5519	4.9679	3.6908	4.3986	3.6463	4.4153	2.0815	2.754	1.4336	6.6643	2.8397	4.0406	5.006	1.6382	2.4049	6.8336	4.7772	2.9321	0.9302	1.7114	9.1978	1.7966	1.5357	4.4476	4.2592	1.0639	4.7857	5.7236	3.1245	1.1624
AC078925.2	0	0	0.0078	0.0141	0.0279	0.0189	0	0.0198	0.0268	0	0	0	0	0	0.0137	0	0.0163	0.0162	0	0	0.0112	0.0236	0	0	0.0059	0.0411	0	0.0062	0	0.0116	0	0.0173	0.0382	0	0	0.0066	0	0.0061	0.0071	0	0	0	0	0	0.0071	0.0279	0	0.0159	0
MEG3	4.1938	0.8032	2.2435	12.9103	17.0717	0.6131	44.4024	0.2475	1.3278	0.0113	4.1843	1.6339	6.2794	8.0939	2.9691	0.3962	7.2482	29.0413	0.8044	0.1595	0.4173	4.0492	4.3221	2.1266	0.8043	4.3864	1.2415	3.3111	2.0774	1.1594	9.873	0.6875	0.0948	7.523	2.2263	7.7558	1.8025	6.2261	3.2276	0.2619	8.5711	2.0398	1.4622	1.5448	2.6254	0.138	0.4114	3.1312	0.1408
AC008489.1	0	0.0365	0	0	0.0285	0	0.0451	0	0	0	0	0.0448	0.0434	0.0339	0	0	0.0332	0	0.035	0.0253	0	0.0482	0.0485	0	0	0	0	0	0.0377	0.0476	0	0	0	0.0484	0	0	0	0.025	0	0	0	0.0405	0.0334	0	0	0	0.0481	0.0651	0.0414
AC113352.1	0	0	0	0	0.0413	0	0	0	0	0	0	0	0	0	0.0404	0	0	0	0.0507	0	0	0	0	0	0	0	0	0.0185	0	0	0	0	0	0	0	0	0	0	0	0	0	0	0.848	0	0	0	0	0	0
SCN4B	9.9481	0.5715	3.4609	1.1707	2.2088	4.0761	0.1659	0.9558	0.993	1.4197	1.2297	1.9662	4.3233	0.71	2.252	0.3764	0.4886	3.0347	0.4365	0.9962	4.9911	1.0424	1.9254	1.7495	0.5248	0.5847	0.7403	1.0299	2.1541	1.6883	0.9915	3.7869	1.6395	0.4282	0.9701	1.9145	0.7067	0.4739	0.949	0.2474	0.8786	0.2703	1.8595	0.3601	0.2682	1.7437	1.5355	2.0794	0.1027
AC108706.1	0	0	0	0	0	0	0	0	0	0	0	0	0	0	0	0	0	0	0	0	0	0	0.0395	0.2279	0	0	0	0	0	0	0	0	0	0	0	0	0	0	0	0	0	0	1.1409	0	0.0472	0	0	0	0
AC010928.3	0	0.0978	0	0.0258	0.0509	0.0344	0	0	0	0	0.0308	0	0	0	0	0	0	0.0591	0	0	0.2034	0.1291	0	0	0.0215	0	0.1416	0	0	0.0212	0.0474	0	0	0.0216	0.0264	0	0	0	0	0	0	0	0.0298	0	0	0	0.043	0.0291	0
AC011193.2	0	0	0	0	0	0	0	0	0	0	0	0	0	0	0	0	0	0	0	0	0	0	0	0.0369	0	0	0	0	0	0	0	0	0	0	0	0	0	0	0	0	0	0	0.044	0	0	0	0	0	0
AL133353.1	0.7103	0.4076	1.3147	0.1381	0.1362	0.6148	0.0719	0.6011	1.8046	0.7074	0.4948	0.6788	0.5883	1.0266	0.8593	0.5398	0.4237	0.8444	0.7804	1.8935	1.3075	1.1906	0.5029	0.8489	1.3429	0.9945	0.8594	0.9336	0.3602	0.8343	0.2538	0.2257	0.8709	1.0413	1.2246	1.3235	1.0768	1.6715	0.462	0.5402	0.6449	1.8092	1.1183	0.8391	0.6019	1.161	0.8059	0.5709	2.1779
AC022150.3	0	0.2606	0.4179	0.0159	0.2189	0.7409	0	0.2218	0.3608	0.1218	0.0379	0.123	0.2741	0.2419	0.1428	0.1487	0.1277	0	0.3839	0.1942	0.3001	0.4364	0.5194	0.3692	0.4756	0.1317	0.4526	0.3354	0.2894	0.235	0.3059	0.6607	0	0.0266	0.5514	0.294	0.2181	0	0.2386	0.6438	0.0222	0	0.1284	0.2347	0.1594	0.4997	0.6474	0.3931	0.0454
AL390778.1	0	0	0	0	0	0	0	0	0	0	0	0	0	0	0	0	0	0	0	0	0	0	0	0	0	0	0	0.07	0.0345	0	0	0	0	0	0	0	0	0	0	0	0	0	0.0612	0	0	0	0.0441	0	0
RPS21P4	0	0	0	0	0	0	0	0	0	0	0	0	0	0	0	0	0	0	0	0	0	0	0	0	0	0	0	0	0	0	0	0	0	0	0	0	0	0	0	0	0	0	0	0	0	0	0	0	0
HAUS6	2.2415	7.9288	8.1902	1.7872	6.75	9.5988	2.7831	5.941	7.9611	6.483	5.9874	4.2391	6.3734	7.9381	5.4443	7.9753	4.2104	3.2257	12.2945	5.3864	4.2343	11.2453	9.8323	7.7385	5.4816	6.3795	9.6404	8.0851	8.7782	9.5685	7.8918	5.4155	2.7439	5.8147	13.5946	6.7324	8.8485	4.0149	7.0783	17.212	5.4934	3.8455	6.6561	7.0939	5.9056	9.2333	14.5841	8.9349	4.3463
MCHR2	0	0	0.0064	0	0.0173	0	0	0	0	0	0	0	0	0	0	0	0	0	0	0	0.0184	0.0097	0.0147	0.0453	0.0146	0.0145	0.0064	0.0257	0.0152	0.0048	0	0.0214	0	0.0049	0.0239	0.027	0	0	0	0.0053	0.0082	0	0.0607	0	0.0059	0	0.0146	0	0
OSBPL9	8.3759	13.1526	13.4361	6.7558	8.8696	18.7545	7.0184	11.4803	14.3272	6.8291	9.0313	13.3983	19.1674	21.6768	9.9443	11.771	10.8327	9.335	13.9738	21.0455	17.9397	10.3405	21.8156	16.3573	13.5484	12.2327	24.0395	12.8693	16.0673	15.4596	18.3513	20.7437	10.9814	19.5337	14.2891	12.8916	15.3712	8.5458	16.1203	15.2487	9.7341	10.9412	11.0356	47.3264	12.0846	13.9984	16.6628	24.4236	4.6576
NPM1P13	0.0276	0.0204	0	0	0.0636	0.0215	0	0.0902	0.0204	0	0	0	0	0	0.0104	0	0	0.0185	0	0	0.0254	0.0135	0	0.0157	0.0134	0.067	0	0.0284	0	0	0	0.0198	0	0	0	0	0	0	0	0	0.0226	0	0.056	0	0	0.0127	0.0134	0.0182	0
PMEL	0.3034	4.1378	2.5137	0.0751	0.4126	1.361	0.3296	0.3969	0.7144	2.0329	3.2496	4.0905	3.4891	4.1674	6.9227	3.1318	1.3699	0.2255	1.5673	2.3688	0.5698	1.5631	5.5193	1.4159	0.7331	1.2865	2.4424	0.8891	3.18	1.8263	3.1048	0.2192	0.2545	1.33	1.0573	6.4035	3.3455	3.5022	1.6434	2.5496	0.4708	0.6976	1.3691	0.8554	0.356	0.8032	2.2981	1.5761	0.2307
AC020931.1	0.0888	0.118	0.0911	0.0415	0.092	0.1799	0.0324	0.0097	0.5373	0.1592	0.0248	0.1448	0.1324	0.0365	0.1467	0.2795	0.0238	0.0713	0.1004	0.5804	0.3434	0.1902	0.0348	0.4124	0.9069	0.0775	0.1593	0.1736	0	0.1451	0.0571	0.3049	1.4938	0.0781	0.0318	0.0096	0.0428	0.009	0.0312	0.2338	0.1307	0.1018	0.1079	0.1181	0	0.2124	0.1728	0.035	0
PDCL3	9.4492	8.2666	10.619	29.8332	11.7807	9.3503	21.2566	6.4519	13.4677	8.4381	20.6519	10.8257	11.557	12.6251	10.65	10.8347	9.5362	14.5243	11.2535	13.9738	16.889	8.9931	10.0116	11.9115	10.159	9.5645	12.5155	12.7431	11.3547	12.4637	14.7069	11.394	8.97	17.2887	8.8697	13.8549	13.4064	15.0219	15.0604	16.3718	14.8657	13.1624	12.7429	18.5115	12.604	14.3678	9.9891	12.0835	8.6171
MSX2P1	0.0155	0.0456	0.0198	0	0.0356	0.5061	0	0	0	0.0462	0	0.014	0.0814	0.0212	0.0116	0.0635	0	0	0	0.0158	0.0285	0.0151	0.0152	0.035	0.2707	0	0	0.0159	0	0.0297	0.0166	0	0	0.0454	0	0	0	0.1404	0.0362	0.0651	0	0.1013	0.0417	0.1028	0.0181	0	0	0	0.0517
OR10B1P	0	0	0	0	0.0152	0	0	0	0	0	0	0	0	0	0	0	0	0.0176	0.0186	0	0	0	0	0	0	0.0128	0	0.0136	0.0201	0	0	0	0	0	0	0.0143	0	0.0133	0	0	0	0	0.0178	0	0	0	0	0.0173	0
AC126755.3	0	0	0	0	0	0	0	0	0	0	0	0	0	0	0	0	0	0	0	0	0	0	0	0	0	0	0	0	0	0	0	0	0	0	0	0	0	0	0	0	0	0	0	0	0	0	0	0	0
KIAA0513	0.6684	0.3833	0.4404	0.9363	1.5598	0.449	0.1726	0.4711	0.4192	0.4487	0.3299	0.4839	0.3121	0.2834	0.5252	0.3609	0.267	0.6533	0.323	0.5691	1.0486	0.8849	0.7335	0.5622	1.0853	0.2544	0.52	0.8295	0.3808	0.684	0.6324	1.0275	0.2062	0.3094	0.5362	1.5444	0.4583	0.2292	0.4039	0.2636	0.4223	0.1462	0.5916	0.3668	0.4175	0.3483	0.9171	0.5801	0.0792
AC004866.2	0	0	0.0319	0	0.0572	0	0	0	0	0	0	0	0	0	0	0	0	0	0	0	0	0	0	0.0281	0	0	0	0.0256	0	0	0	0	0	0	0	0	0	0	0	0	0	0	0.1342	0	0	0	0	0	0
MARCO	0.0173	0.017	0.0442	0.651	1.3962	0	0	0.169	0.1867	0.0515	0.7372	0.0573	0.0908	0.0315	0.0216	0.1731	5.226	0.0385	0.0162	0	0.0106	0.3918	0.0507	0.0781	0.0447	0.078	0.0295	0.0887	0.1225	0.0166	0.1171	0.0165	0.1995	0.0393	0	0.0498	0.0185	0.8236	0.0471	0.0061	0.0282	0.0848	0.1319	0.0382	0.0405	0.0053	0.0224	0.2496	0.3655
C3orf79	0	0	0	0	0.0237	0	0	0	0	0	0	0	0	0	0	0	0	0	0	0	0	0	0	0	0	0	0	0.0212	0	0.0198	0.0221	0	0	0.0201	0	0	0	0	0	0.0217	0	0	0.1113	0	0	0	0	0	0
SNRPGP1	0	0.0795	0.069	0	0	0	0	0	0.1589	0.0805	0	0	0	0	0	0	0	0	0.1522	0.055	0.3966	0.0524	0.0528	0	0.1047	0	0	0.0554	0	0	0	0	0	0.0526	0	0	0.1729	0	0	0.1134	0	0	0	0	0	0	0	0.0708	0
ARHGEF7	5.7051	4.4298	8.9798	10.6139	8.8036	10.5985	8.5998	8.4875	5.0768	9.4954	9.0566	6.0274	6.1546	7.9395	7.3888	6.4694	6.6891	6.4684	8.7849	4.9667	4.7375	8.7584	11.164	7.1338	5.96	5.5527	6.6932	8.442	10.0638	7.9298	5.3379	4.8767	3.6958	3.8766	9.932	7.1443	5.4847	4.3743	8.6796	11.0558	4.2756	4.4769	8.353	9.0215	8.3379	10.3386	7.6229	10.4227	2.5319
RF00019	0	0.1782	0.3095	0	0.139	0.1882	0	0	0.7127	0.7217	0	0.1094	0.3178	0	0.3627	0	0	0.3231	0.5118	0.4932	0.4446	0.2351	0.2368	0.1367	0	0.2341	0.3095	0.2485	0.3675	0	0	0	0.1269	0.3541	0.2883	0.1307	0	0	0.2828	0.2543	1.1842	0	0.163	0	0.1417	0	0.1174	0.3177	0
RNU6-1198P	0	0	0.686	0.4165	0.2053	0	0	0.3884	0	0	0	0.3232	0	0	0	0.2441	0	0	0	0	0	0.1737	0	0	0.1735	0.346	0	0	0	0	0	0	0	0	0	0	0	0.5399	0.2089	0	0	0	1.445	0	0	0	0	0	0
AC084759.2	0.0092	0	0	0.0215	0.0212	0.0144	0	0	0	0	0.0643	0	0	0	0	0	0	0	0.0261	0	0.017	0	0.0181	0.0523	0.009	0	0	0.0475	0.014	0	0	0	0.0679	0.0271	0.011	0.03	0	0	0	0	0.0453	0	0.5358	0	0.0108	0.0255	0	0	0
AC005294.1	0	0	0	0.0497	0.1958	0	0	0	0	0	0	0	0	0	0	0	0	0.2845	0	0	0	0	0	0	0.0827	0	0	0	0.0647	0	0	0	0	0	0	0	0	0.2575	0	0	0	0	0	0.0566	0	0	0	0	0.0712
EIF1AX-AS1	0.0949	1.2134	0.2432	0.0369	0.182	0.0493	0	0.1721	0.0933	0.0473	0	0.2578	0.3052	0	0.095	0.5625	0.1274	0	0.2234	0.5167	0.2329	0.1539	0.5581	0.1791	0.3076	0.2146	0	0.1627	0.3368	0.0912	0.0339	0.1357	0	0.0309	0.1888	0.1027	0.1015	0.1276	0.1852	0.1332	0.1034	0	0.7684	0.1261	0.0742	0.2036	0.0923	0.3328	0
AL138808.1	0.0967	0.9035	0.1239	0.1128	0.3337	0	0.1175	0.1052	0.0951	0.337	0.0898	0.1459	0.0283	0.0441	0.1452	0.1763	0.4326	0	1.1836	0.2632	0.2966	0.6587	0.158	0	0.4074	0.1874	0	0.2652	0.049	0.031	0.1382	0.1383	0.1694	0.252	0.1154	0.0697	0.1552	0	0.0377	0.1697	0.158	0.0528	0.1305	0.1285	0.1513	0.3556	0.0627	0.0424	0
RF00157	0	0	0	0	0	0	0	0	0	0	0	0.137	0	0	0	0	0	0	0	0	0	0	0	0	0	0	0	0	0	0	0	0	0	0	0	0	0	0	0	0	0	0	0	0	0	0	0	0	0
H2AFZP2	0	0	0.0802	0	0.072	0.0488	0	0.0681	0.0462	0.0468	0.0436	0.0567	0.0275	0.1714	0.094	0.0428	0.084	0.0419	0.0884	0.0959	0.0576	0	0.0307	0.1063	0.0609	0.0607	0.0802	0.2576	0.0952	0.0902	0.0336	0.0448	0.0658	0.1835	0.1121	0.1016	0.0502	0.0316	0.0366	0.1318	0.1023	0.0513	0.2957	0.0416	0.0735	0.2015	0.0913	0.1235	0.1047
UBE2W	3.37	4.225	4.5763	11.0009	5.8568	7.3267	13.8904	3.8831	5.6158	5.2406	6.3572	4.453	5.4715	5.3923	4.0287	6.5185	4.6133	5.8038	5.5648	6.4151	6.0944	4.6894	4.424	5.3661	5.0339	5.146	6.6412	4.587	4.7685	5.4901	4.9392	7.079	4.3989	7.8095	6.4589	8.5616	3.9884	9.0723	4.6736	5.9626	10.5073	7.0988	4.452	4.0749	7.6258	5.1799	4.8991	5.764	11.136
AL590004.1	0.0399	0	0	0	0	0.0621	0	0	0	0	0	0	0	0.0546	0	0	0	0	0	0	0	0	0.0391	0	0	0	0	0	0	0	0	0	0	0	0.0476	0.0431	0	0	0	0	0	0	0	0	0	0	0	0	0
RASAL2-AS1	0.5887	0.9509	0.4747	0.5981	0.4379	0.933	0.4995	0.3755	0.554	0.5079	0.5374	0.5422	0.6409	0.5003	0.2515	0.472	0.361	0.8145	0.595	0.7979	0.7474	1.6695	0.7313	0.8447	0.8586	0.733	0.5722	0.7309	0.525	0.7462	0.2883	0.5444	0.3147	0.62	0.5088	0.7468	0.782	0.4913	0.4397	0.5023	0.3069	0.5734	0.7945	0.7554	0.7443	0.6579	0.765	0.7208	0.1358
HMGB3P8	0	0.0306	0	0	0.0238	0.0323	0	0.0225	0	0	0.0289	0	0	0	0	0	0	0	0	0	0.0381	0	0	0	0	0	0	0.0426	0	0	0	0	0	0	0.0247	0	0	0	0	0	0	0	0	0	0	0	0	0	0
RF00019	0	0	0	0	0	0	0	0	0	0	0	0	0	0	0	0	0	0	0	0	0	0	0	0	0	0	0	0	0	0	0	0	0	0.1146	0	0	0	0	0	0	0	0	0	0	0	0	0	0	0
ZNF239	2.2112	3.3609	2.1251	1.6572	3.202	3.1482	3.978	2.2868	3.0582	3.7303	2.503	2.8736	3.9119	3.2756	5.2708	2.2228	2.6353	2.8427	3.4869	2.1943	3.2282	4.2578	3.3354	3.1889	3.5725	3.8618	3.6082	7.5593	2.1749	4.0303	1.9769	2.8353	1.4124	5.3327	2.9976	3.7381	4.7197	1.5139	5.1494	2.2079	6.2615	2.9652	5.4214	0.6207	5.2001	2.4537	3.7862	2.7451	4.1206
ACYP1	5.1113	12.3038	7.0658	3.509	5.5669	5.4036	35.322	4.4523	5.3463	9.0908	6.6143	9.7908	8.0084	8.5726	8.3586	5.1259	9.528	14.5584	10.6052	13.7057	7.759	7.8633	5.4561	6.2065	3.1574	11.8859	7.8878	6.6008	6.8469	3.7887	5.7297	5.183	15.3307	18.5658	5.1472	7.1041	8.9446	3.1833	10.5078	5.4983	21.27	9.1562	9.5973	5.7745	10.2723	5.6192	4.9327	9.1308	4.3883
FO393413.1	0	0	0	0	0	0	0	0	0	0	0	0	0	0	0	0	0	0	0	0	0	0	0	0	0	0	0	0.0631	0	0	0	0	0	0	0	0	0	0	0	0	0	0	0	0	0	0	0.0596	0	0
AC104051.1	0	0	0	0.049	0	0	0	0	0	0.094	0.0292	0	0	0	0.0315	0	0	0.0281	0	0	0.0772	0	0	0.0238	0	0	0	0.0216	0	0	0	0	0	0.041	0	0	0	0	0.0246	0.0221	0	0	0.1982	0	0	0	0	0	0.0351
AL590705.2	0	0.1256	0.0545	0	0.0979	0.5967	0.2327	0.0926	0.1255	0	0	0.0771	0.3359	0.1165	0.0639	0	0.1142	0.2276	0.1202	0.3041	0	0.1657	0.2503	0.0964	0.331	0	0.3271	0.2626	0	0.0409	0.1368	0.0609	0	0.0832	0.0508	0.4604	0.0683	0	0	0.3136	0	0	0.0574	0.1697	0	0.0391	0.331	0.1119	0
COL4A4	0.052	0.0321	2.3366	0.1932	0.26	4.0742	0.7114	0.0302	0.2603	0.4061	0.1397	0.3238	0.0784	0.0794	0.0354	1.1834	0.6455	2.5341	0.8995	0.8993	0.5383	0.0612	4.2323	0.2107	0.4288	0.0972	0.079	0.3679	1.6728	3.5837	0.2021	14.2782	0.4369	0.0295	0.0577	0.6066	0.0776	0.2145	0.058	1.7991	0.2804	0.9279	1.8916	0.0482	0.0539	0.4777	0.1504	0.7263	0.485
AL035404.2	0.118	0.2902	0.0504	0	0.181	0.0613	0	0.1284	0.2901	0.1175	0.9863	0	0	0	0.0886	0	0	0.263	0.0556	0	0.2896	0	0.1157	0.2227	0.1912	0.0381	0	0.0809	0.0598	0.189	0.0422	0.1125	0.9921	0.1922	0.1408	0	0.0631	0.2777	0.1381	0.1242	0	0	0.2654	0.0523	0.0923	0.0723	0.2295	0.0517	0
TLX1	1.405	0.0206	0.0269	0.3956	0.3096	0.5663	2.7583	0.0038	0.1341	3.566	8.2535	0.0475	0	0.1866	3.2096	0	0.6145	0.3272	0.0148	0	0.0064	0	0.0137	0.0198	0.0102	0.7284	0.0224	0.0072	0.0053	0.0302	0.0562	0.06	0	0.0307	0.1543	0.1853	0.4825	0.2467	0.4051	0.0074	0.0628	0	0.3396	1.5421	0.0041	0.1125	0.2447	0.1517	0
ZNF735	0	0	0	0	0.0339	0	0	0	0	0	0.0205	0	0	0.0067	0	0.0201	0	0.0197	0.0624	0	0.0271	0	0	0.0111	0	0	0.0063	0.0252	0.0075	0	0	0.0913	0	0.0144	0.0469	0.0106	0	0	0	0.0207	0	0.008	0.0927	0	0.0058	0.0045	0	0	0.041
SOX13	3.7159	9.7859	9.5379	2.0797	4.8408	9.4829	0.9075	3.4683	5.9478	14.3422	2.712	8.271	6.5898	5.3947	3.1072	7.3574	5.9241	5.9441	10.8644	11.2282	12.5325	11.5523	6.5633	17.1526	33.2396	8.7347	10.4274	4.779	7.0527	19.4277	5.7003	12.2905	11.9125	8.4884	8.2588	8.0617	21.0702	2.6489	6.4933	6.5325	1.9277	2.4591	3.7773	5.6302	5.2676	8.7548	17.6966	9.7083	1.0511
RNA5SP272	0	0.1589	0	0	0	0	0	0.1172	0.1589	0	0	0.1951	0	0.295	0	0	0	0	0.1522	0	0	0	0	0	0	0	0	0	0.1639	0	0	0	0	0	0	0	0	0	0	0	0	0	0.1454	0.2863	0	0.099	0	0	0
KCTD17	8.5749	11.2015	11.5656	2.5191	8.7596	10.7657	0.8995	10.8856	5.5082	15.4573	8.1257	11.8632	11.5136	7.8214	10.4603	7.6667	13.1164	5.3899	10.4453	14.0561	6.3596	11.7915	15.6164	8.3046	4.5234	9.2396	10.782	16.2466	10.6747	12.7448	11.3494	4.0695	0.8705	3.6491	9.999	16.925	15.624	8.9247	10.2446	16.3453	3.7733	2.9585	8.6818	12.0634	19.5784	10.8909	11.7819	11.0627	0.7034
AC012362.1	0	0	0	0	0	0	0	0	0	0	0	0	0	0	0	0	0	0	0	0	0	0	0	0	0	0	0	0	0.0246	0	0	0	0	0	0	0	0	0	0	0	0	0	0	0	0	0	0	0	0
OR52N1	0	0	0	0	0	0	0	0	0	0	0	0	0	0	0	0	0	0	0	0	0	0.0121	0	0	0	0	0	0	0	0	0	0.0178	0	0	0	0	0	0	0	0	0	0	0	0	0	0	0	0.0163	0
AC011995.1	0	0	0	0.0241	0.0238	0	0	0.0225	0	0	0	0	0	0.085	0.0155	0	0.0278	0	0	0	0	0.0201	0	0	0.0603	0.0802	0	0.0638	0	0	0	0	0	0	0.0247	0	0	0.0417	0	0	0	0	0	0	0	0.019	0	0	0
SCYL2	7.2877	16.3636	18.2056	4.6303	12.7732	13.2076	13.8134	11.3071	18.7771	10.3009	12.0575	11.8663	7.8175	10.8859	14.1435	7.0542	8.0715	8.7173	15.4945	9.6284	12.319	17.6019	13.6051	11.2256	17.6034	12.3969	13.8806	11.5012	15.2089	12.7123	12.8667	12.4532	6.1183	12.2657	12.949	15.9843	12.9003	12.9736	10.4693	14.5838	14.9518	12.0717	14.2111	12.4721	13.5484	12.7389	18.9308	14.4029	14.836
AC106872.6	0	0	0	0.0311	0	0.0277	0	0	0.0131	0	0	0	0	0	0.0067	0	0	0	0.0251	0	0	0	0.0087	0.0101	0	0	0.0341	0.0457	0.0405	0.0171	0	0	0	0	0.0212	0.0096	0.0143	0.009	0	0.0187	0	0	0.012	0	0.0208	0.0082	0.0086	0	0.0149
AC007091.1	0	0	0	1.2819	0.2674	0	0.231	0.1149	0.1247	0	0.0294	0	0	0.0289	0.0317	0	0.0851	0.0565	0	0	0	0	0.0207	0.1196	0.2465	0	0	0.0869	0	0.0609	0	0	0	0	0	0.1828	0	0.0213	0	0.0222	0.6905	0	0.114	0.3088	0.0248	0	0.0411	0	0.1413
AC010136.1	2.905	2.2052	1.025	0.6387	0.5086	0.7872	1.1894	1.214	0.9627	1.0692	1.6423	1.0101	1.3292	1.8447	1.0116	2.6202	0.6499	1.5203	0.7136	1.6119	1.8987	1.2907	1.0524	4.8146	0.655	1.4896	1.9417	2.1871	0.9927	1.7601	1.2636	1.4752	11.2609	1.3578	1.1558	1.617	0.4055	0.276	1.2322	1.0861	0.4816	0.5515	2.5851	0.9232	1.8771	0.9871	1.4944	1.3012	0
AC109464.1	0	0	0	0	0.0168	0	0	0	0	0	0.0407	0	0	0	0	0	0	0	0	0	0	0	0	0	0	0.0849	0	0.0601	0	0	0	0	0.0153	0	0	0	0	0	0	0	0	0	0.0591	0	0	0	0	0	0
RAD52	2.2972	5.7302	4.3918	1.3586	2.0257	3.2057	5.5703	1.9034	3.6583	2.3403	2.4729	4.4698	2.0221	2.907	3.5805	2.1936	2.9799	3.3701	5.0709	6.1502	4.1603	4.5493	2.1483	3.5639	4.173	3.4632	1.9522	3.7927	3.3861	2.3695	1.3429	2.8813	3.236	5.6391	3.658	3.0936	2.6888	1.1512	1.8808	3.9693	2.8261	2.3176	4.3247	2.5334	2.3639	2.2669	3.652	2.1992	1.1502
PERM1	0.0244	0.0361	0.0268	0.6561	0.0241	0.0054	0.0255	0	0.0361	0.0156	0.107	0.0411	0.0276	0.0239	0.0315	0.0143	0.0609	0.4203	0.0444	0.0392	0.045	0.0782	0.0513	0.0554	0.0102	0.1659	0.0537	0.0251	0.0212	0.0168	0.0225	0.0849	0.2386	0.0102	0.0042	0.0113	0.0729	0.2641	0.0041	0.0037	0.0114	0	0.1037	0.1578	0.041	0.0225	0.0441	0.023	0
IGHV1OR15-3	0	0	0	0	0	0	0	0	0	0	0	0	0	0	0	0	0	0	0	0	0	0	0	0	0	0	0	0.035	0	0	0	0	0	0	0	0	0	0	0	0	0	0	0	0	0	0	0	0	0
AC011444.3	0.5886	0.4885	0.7543	0.4293	0.4656	1.2037	0.6035	0.6405	1.3568	1.4289	0.5126	2.2984	1.8714	1.4608	2.4862	1.9626	0.6913	0.9349	0.6756	3.9063	0.9481	0.3581	0.1803	1.2497	0.7154	0.4279	1.084	0.4541	0.2239	2.2275	0.3549	0.5262	0.464	2.4809	0.4391	2.9853	1.1811	0.5194	0.2584	0.6586	0.6012	0.0602	0.2979	1.5157	0.6043	0.5412	0.8944	0.8709	1.3537
RANP6	0.0928	0.0548	0.1427	0	0.0427	0.0579	0.2369	0.0808	0.0548	0.0277	0.0776	0.1009	0.0326	0.0763	0.1255	0.0254	0.0249	0.0497	0.0787	0.019	0.0684	0.0903	0.0364	0.021	0.0361	0.108	0.0714	0.191	0.0847	0.1784	0.0398	0.0531	0.039	0.0726	0.0886	0.0603	0.0298	0.0936	0	0.0782	0.091	0.0912	0.5763	0.074	0.0436	0.1536	0.2167	0.0488	0.3105
AC104687.1	0	0	0	0	0.0334	0.0452	0	0	0	0	0	0.0263	0	0	0	0	0	0.1164	0.041	0.0889	0.0534	0	0.0569	0.0329	0.0564	0	0	0.0597	0	0	0	0.0415	0.0305	0.0284	0	0.0314	0.0932	0	0	0	0	0	0	0	0.0341	0.08	0.0282	0.0382	0.1456
LINC01167	0	0.0876	0.1268	0	0	0	0.0361	0	0	0.1479	0.0276	0.0179	0	0	0	0	0	0	0	0	0.328	0.0193	0.1164	0	0	0.4797	0	0.0611	0	0.1141	0	0.1416	1.2483	0	0	0	0	0	0.0232	0	0	0	0.0534	0.1842	0.0929	0	0	0.026	0
NFIL3	13.4707	33.3872	11.0302	12.6611	19.0019	14.5818	18.0086	14.1212	10.5411	13.8523	15.4915	22.2797	19.1616	25.6212	9.1243	28.0424	41.4566	8.8894	15.7635	16.0068	11.084	16.4983	18.2809	17.2392	9.1109	13.3578	21.2102	13.633	16.2527	9.3691	16.4131	10.9737	5.8281	14.2242	19.8426	13.0357	16.661	28.5989	14.649	31.9973	22.9981	13.7843	13.7443	16.9881	22.9581	15.7758	19.2229	24.4357	14.9044
AC107031.1	0.0689	0.2034	0.0442	0	0	0.1074	0	0	0.2542	0	0	0.0624	0	0	0.1035	0	0	0	0.0487	0.0352	0.3171	0.0671	0.0338	0.078	0.067	0	0	0.0354	0.0524	0.0662	0	0	0	0	0	0.0746	0	0	0	0	0.1126	0	0	0	0.0404	0.0317	0.0335	0	0
AC009478.1	0.0426	0.5964	0.3272	0	0.0979	0.6961	0	0.4167	0.0942	0.0636	0.0593	0.2119	0.4851	0.4661	0.2077	0.2328	0.4855	0.0569	0.3005	0.2389	0	0.5177	0.3545	0.0723	0.4137	0.0825	0.1363	0.569	0.4531	0.6134	0.1596	0.0304	0	0.0624	0.6348	0.1151	0.0683	0.0858	0.1245	0.0224	0.1043	0.3135	0.6604	0.7917	0.0499	0.4303	0.4138	0.7275	0.0356
AC019080.1	0.1384	0.2435	0.2457	0.1206	0.4182	0.3845	0.5531	0.2558	0.1992	0.1121	0.1649	0.1872	0.3363	0.2785	0.1227	0.4881	0.2529	0.2498	0.1319	0.4869	0.2977	0.1964	0.3808	0.0925	0.1881	0.1455	0.1196	0.2058	0.1395	0.1234	0.2449	0.4006	0.4363	0.1353	0.2826	0.3518	0.083	0.185	0.205	0.2721	0.3815	0.1856	0.468	0.1595	0.1859	0.164	0.2092	0.296	0.1255
AC073283.3	0.0122	0.0179	0	0	0.056	0	0	0	0	0	0.0169	0	0.0213	0	0	0	0	0	0	0	0.0224	0	0.0119	0	0	0	0	0	0.037	0	0.0261	0	0	0	0	0.0132	0	0	0	0.0256	0	0	0	0	0.0428	0.0224	0.0118	0.016	0
FGF2	1.9766	3.7886	4.8668	1.2871	3.8072	4.8478	8.9517	4.0251	2.5905	2.552	3.6094	4.0954	5.1169	5.1471	3.8164	1.6801	4.5812	3.8852	3.8964	4.9225	2.1084	2.8599	11.0702	1.9843	1.0931	3.3684	19.5099	5.3828	2.2418	3.3311	10.0247	0.8355	0.8884	8.479	3.3366	4.9703	3.4107	1.9133	7.1446	2.7261	5.0184	4.9067	3.8297	0.8678	4.9366	3.354	4.4708	6.7959	2.8985
AL590408.1	0	0	0	0.1848	0.0304	0.0411	0	0	0	0	0.2206	0	0	0.0361	0.0198	0	0	0.1765	0	0	0	0.1284	0	0.0897	0	0.0512	0	0.0543	0	0	0.0566	0	0.0277	0	0	0	0	0	0.0618	0.0278	0	0	0.1425	0	0.031	0.0243	0	0.0347	0
GEMIN8P3	0	0	0	0	0	0	0	0	0	0	0	0	0	0	0	0	0	0	0	0	0	0	0	0	0.0161	0	0	0	0	0	0	0	0	0	0.0198	0	0	0	0	0	0	0	0	0	0	0	0	0	0
AC093142.1	0.1028	0.1011	0.0878	0.1199	0.0788	0	0.3122	0.0373	0.1011	0.1535	0.0955	0.031	0.0601	0.1407	0.0257	0	0	0.1375	0	0.1749	0.0631	0.0333	0	0.1164	0.1666	0.1328	0.1756	0.0705	0.0521	0.0329	0.0734	0.049	0.2881	0.1339	0	0.1853	0.055	0.0346	0.2005	0.0361	0.112	0.9536	0.3699	0	0	0.0945	0.1333	0.0451	0.9168
RBBP4P1	0.1124	0.3871	0.5884	0.1093	0.3019	0.3504	0.1025	0.4588	0.2626	0.126	0.2089	0.2036	0.3616	0.3977	0.2181	0.4742	0.1887	0.0877	0.6089	0.4401	0.3967	0.301	0.6062	0.3183	0.41	0.2543	0.4802	1.0121	0.1711	0.5403	0.4621	0.3082	0.128	0.1007	0.5033	0.3548	0.7671	0.2363	0.3181	0.3947	0.245	0.1534	0.4173	0.3985	0.4288	0.8443	0.811	0.419	0.3134
PART1	0.998	0.009	0.4211	0.3849	0.6785	0.0076	1.2626	0.2722	0.1791	0.0348	0.1059	0.0744	0.4849	0.2619	0.1197	0.0268	0.2863	0.2148	0.0173	0.005	0.0045	0.0155	0.286	0.0125	0.0274	0.7095	0.011	0.198	0.0485	0.357	0.0289	0.0158	0	0.0431	0.0966	0.0133	0.0807	0.6232	0.4694	0.0181	0.5911	0.9355	0.2813	0.0733	0.0662	0.018	0.2659	1.2239	0.0062
URM1	10.7448	10.3567	13.661	10.9849	9.4612	9.7371	4.6846	11.7448	17.647	8.8052	17.2359	13.634	15.9241	15.5065	12.7035	12.1122	12.6605	13.4025	16.6137	14.1281	12.2276	13.083	10.4025	20.4976	7.1283	12.4863	13.6751	11.7168	19.6536	11.5665	14.956	10.2098	10.4405	14.5179	12.022	16.5181	12.2727	12.0857	14.2612	21.4115	7.4083	9.0209	10.3217	20.4776	12.5499	12.6113	13.9846	12.5514	6.7927
HNRNPA0	21.8636	47.6592	38.0639	17.9469	18.5681	40.8432	29.7463	30.4	48.8741	46.8911	37.9033	41.4048	28.9107	47.4335	45.7848	21.2934	33.5738	32.5074	39.9979	31.9727	30.0408	28.0869	40.3885	29.0234	33.8617	46.6604	48.6471	40.082	33.8627	35.3525	40.917	23.2518	22.2278	41.709	42.2392	33.6486	37.516	24.4415	46.9053	30.4765	33.0383	37.3136	29.0779	38.7631	40.7676	38.7821	38.171	41.9738	28.2015
PHBP14	0	0	0	0	0	0	0	0	0	0	0	0	0	0	0	0	0	0	0	0	0	0	0	0.0369	0	0	0	0	0	0	0.1397	0	0.0342	0	0	0	0	0	0	0	0	0	0	0	0	0.03	0	0	0
AC123768.1	0.1594	0.0235	0.1634	0.0558	0.1284	0.0497	0	0.0694	0.047	0.1191	0.0222	0.0866	0.0699	0.2401	0.0718	0.0218	0.1712	0	0.1576	0.3418	0.0587	0.0465	0.0469	0.1083	0.0465	0.0618	0.0204	0.1312	0.0485	0.0919	0.0854	0.0456	0.1508	0.0467	0.1142	0.1207	0.1279	0.0322	0.0747	0	0.0261	0.1044	0.4088	0.0212	0	0.0293	0.031	0.2097	0
TAX1BP1	8.5348	8.6002	7.2856	5.9297	12.0275	11.6146	21.2809	8.0632	12.0403	9.3157	5.8889	7.6518	8.2218	9.5175	10.8646	8.5173	8.4191	7.8588	5.8676	9.8017	15.6842	10.8866	9.1093	7.3238	11.9453	11.4181	11.0912	9.4479	9.7585	11.61	10.2871	14.0142	7.2518	11.2506	16.1848	10.7923	9.0423	6.8324	8.1421	6.0731	14.6469	9.2837	15.2078	12.2807	10.2299	10.3889	11.8533	10.6977	5.1035
DNAJC11	2.3217	5.1712	6.2065	1.4356	3.2639	7.3301	0.433	3.9955	2.5645	2.256	2.8643	3.2181	3.8743	4.2	2.5823	3.1661	3.7288	1.3465	2.3259	4.8295	6.2916	6.0303	6.1405	4.9966	6.1067	3.2948	5.8072	6.0277	5.8222	5.0526	7.025	9.7932	2.7417	1.1701	5.3204	5.2835	5.86	2.7969	3.905	6.4052	0.9995	0.9244	3.7617	4.6987	4.2283	7.3686	5.2842	5.85	0.48
AC232271.1	0.5021	1.0071	0.7054	0.1079	0.456	0.8508	0.4816	0.3738	1.4553	0.5724	0.4234	0.6021	0.6296	0.9708	0.248	0.4337	0.6679	0.5949	0.7403	2.3425	1.3133	0.9901	1.0231	1.3962	0.6851	0.572	1.0663	0.8517	0.3417	0.8507	0.3305	0.8377	1.7403	1.0287	0.5729	0.9339	0.3888	0.0933	0.7837	0.5982	0.403	0.3317	0.6419	1.3462	0.7596	1.6399	0.5268	0.9904	0.0442
HYKK	1.1628	0.5502	0.5262	0.2958	0.2531	0.5125	0.3475	0.4332	0.7263	0.3505	0.397	0.5729	0.8599	0.4963	0.6812	0.6992	0.3403	0.5044	0.512	0.8149	0.7405	0.5281	0.5997	0.4768	0.5989	0.4894	0.4536	0.4591	0.3952	0.7994	0.5682	0.5513	0.7663	0.5836	0.3001	0.6347	0.5381	0.5641	0.569	0.5736	0.4999	0.7787	1.1931	0.7908	0.3171	0.7782	0.3769	0.5869	0.5887
RBMY2BP	0	0	0	0	0	0	0	0	0	0	0	0	0	0	0	0	0	0	0	0	0	0	0	0	0	0	0	0	0	0	0	0	0	0	0	0	0	0	0	0	0	0	0	0	0	0	0	0	0.0173
AQP7P4	0	0	0	0	0	0	0	0	0.0169	0	0	0	0	0	0	0	0	0.1228	0	0	0	0	0	0	0	0	0	0	0	0	0	0	0	0	0	0.0124	0	0	0	0	0	0	0	0	0	0	0	0	0.0192
MORF4L2-AS1	0.4356	0.7188	0.4627	0.2542	0.488	0.4912	0.3552	0.3243	0.6257	0.6251	0.3833	0.5709	0.372	0.5965	0.3874	0.5723	0.4231	0.4523	0.6153	1.4805	0.6858	0.887	0.8035	0.9735	0.7022	0.3167	0.6168	0.4894	0.4273	0.65	0.3625	0.5902	0.7952	0.9131	0.8415	0.5705	0.3864	0.1387	0.5301	0.4406	0.5714	0.2816	0.7735	0.7084	0.3026	1.0698	0.5964	0.7011	0.0959
USP38	2.6426	6.9686	6.9673	4.1193	6.9022	9.6675	4.0691	6.5913	7.8375	4.2939	3.9832	5.9168	4.8088	7.6423	3.6018	3.1987	4.567	4.635	7.3332	5.8065	7.8095	8.5675	7.863	6.8221	9.2981	5.1811	9.8121	5.969	6.802	7.9272	8.6165	9.3901	2.0091	7.083	8.1316	5.1633	9.2672	3.0243	6.1783	6.5448	6.3134	6.1848	4.7162	4.7976	5.1742	9.6396	9.1323	9.1801	4.9589
SLC9A4	0.0027	0	0.0068	0.0343	0.0215	0	0	0.0058	0.0039	0	0.0223	0	0	0	0	0.0037	0.0072	0.025	0	0	0.0147	0.0026	0.0052	0.003	0	0.0129	0	0.0082	0.0528	0	0.0029	0	0.0056	0.0026	0	0.0087	0.0043	0.0135	0.0125	0.0028	0.0087	0.0219	0.0108	0	0	0.0049	0	0	0
OLIG3	0	0	0	0	3.4643	0	0	0	0	0	0	0	0	0	0.0789	0	0	0	0.0165	0	0	0.0114	0	0	0	0.0283	0	0	0.0089	0.5945	0	0	0	0	0	0	0	0	0	0.0061	0.658	0.0096	0	0	0	0	0.0113	0	0
ERICH6B	0.0447	0.144	0.1251	0.0522	0.1076	0.0697	0.0148	0.062	0.084	0.1033	0.0397	0.0516	0.0606	0.1281	0.0763	0.0779	0.0218	0.0054	0.2528	0.0955	0.1497	0.1781	0.1355	0.1612	0.1621	0.0591	0.0938	0.1548	0.0681	0.1485	0.0785	0.0291	0.0598	0.0397	0.1165	0.11	0.0196	0.0246	0.0809	0.0771	0.0066	0.0466	0.1482	0.0811	0.0525	0.0935	0.087	0.0642	0.0272
AC020661.3	0.1435	0.6351	0.6129	0.4465	0.2476	0.3353	0	0.1561	0.3881	0.1786	0.2665	0.2382	0.2726	0.2292	0.0539	0.0327	0.4173	0.2878	0.4391	0.7324	0.6163	0.3724	0.3282	0.1895	0.3255	0.2318	0.1225	0.3444	0	0.4137	0.1538	0.2736	2.1363	0.444	0.1998	0.3105	0.0384	0.0965	0.28	0.2014	0.1954	0.1566	1.194	0.2225	0.1403	0.3078	0.1163	0.2201	0.16
LINC01097	0.0054	0.0555	0.0206	0	0.0062	0	0	0.0117	0	0	0.0823	0	0.0047	0	0.0282	0	0	0	0.0076	0	0	0	0.1948	0	0.0157	0.0104	0	0.0221	0	0	0	0	0	0	0.0192	0.0116	0.0172	0.0054	0	0	0.0088	0.0176	0.0072	0	0.0126	0.0049	0.0052	0	0
C8B	0.0131	0.0065	0	0	0.0302	0	0	0	0.0194	0	0	0	0	0	0	0	0	0	0	0	0.0403	0	0	0	0	0	0	0.0045	0	0	0	0	0.0046	0	0	0	0	0	0	0.0046	0	0	0.0059	0	0	0	0	0	0
AL132765.2	0	0.2513	0.0873	0.0398	0.0784	0.1062	0.0621	0.0371	0.7538	0.1018	0	0.1234	0.1792	0.1399	0.1023	0.1398	0.1372	0.1367	0.1444	0.313	1.1287	0.2652	0.2004	0.3086	0.2319	0.3302	0.2182	0.1752	0.0518	0.0655	0	0.4872	0.8234	0.3995	0.0407	0.258	0.164	0	0.0399	0.1435	0.0557	0.1116	0.5516	0.2716	0.1599	0.0626	0.0663	0.224	0
ZNFX1	4.085	3.2072	4.7704	2.0361	4.6675	4.9705	0.735	3.5981	3.0387	3.3581	2.727	2.4445	1.8109	3.1832	3.3432	4.1377	3.6307	3.385	4.3019	2.7172	5.3422	11.09	3.8676	5.9574	3.9296	2.8541	3.5327	4.1456	3.7489	4.0796	3.2317	11.6553	4.4453	2.5673	3.2179	4.3352	2.7617	2.0347	3.2132	5.5469	1.4686	1.4023	1.852	1.8902	3.2039	5.4897	2.9604	3.3133	0.3661
AC116348.4	0.0344	0.2028	0.0881	0	0	0	0.0626	0	0	0	0	0.0933	0	0.1411	0.0258	0	0	0.2298	0	0.1052	0.0632	0	0	0.0778	0	0.0666	0	0	0	0	0.0737	0	0.0361	0.0336	0.082	0	0	0.0693	0.0402	0.0724	0	0	0.9737	0	0	0	0.0334	0	0
AC133963.1	0.0498	0	0.0365	0.0083	0.0328	0.0333	0.026	0	0.0735	0.0745	0.0694	0.0516	0	0.0293	0.016	0	0	0.0381	0.0503	0.1745	0.0918	0.0277	0	0.0564	0.1593	0	0.0274	0.0073	0.0108	0.1095	0.0305	0.2037	0.217	0.0139	0	0.0539	0.0114	0.0359	0	0.165	0.0698	0.0233	0.0577	0.0095	0.0084	0.0524	0.0416	0.0187	0
MIR1587	0	0	0	0	0	0	0	0	0	0	0	0	0	0	0	0	0	0	0	0	0	0	0	0	0	0	0	0	0	0	0	0	0	0	0	0	0	0	0	0	0	0	0	0	0	0	0	0	0
AC023830.1	0.0155	0.1715	0.0993	0.1628	0.1159	0.0362	0.0141	0.0337	0.0457	0.0579	0.0216	0.0842	0.0748	0.0849	0.0524	0.1166	0.156	0.1866	0.1204	0.1582	0.0856	0.0905	0.1215	0.1228	0.0226	0.1202	0.0099	0.0399	0	0.0968	0.0332	0.0997	0.0977	0.0454	0.0462	0.0503	0.0124	0.0703	0.0272	0.0816	0.038	0	0.1046	0.103	0.0455	0.0214	0.0226	0.0408	0.013
MORC1-AS1	0	0	0	0	0	0	0	0	0	0	0	0	0	0	0	0	0	0	0	0	0	0	0	0.072	0	0	0	0.0218	0	0	0	0	0	0	0	0	0	0	0	0	0.0346	0	0.2289	0	0.0249	0	0	0	0
SCARNA7	2.174	2.7798	2.4143	3.5516	0.5419	0.5081	1.5849	1.8924	1.3897	2.2192	1.6153	2.2308	0.9215	2.2821	1.6051	4.1135	2.2857	4.3614	2.4055	7.7682	5.269	1.34	0.6038	1.8871	2.1138	4.2146	2.6458	0.82	0.3858	0.975	1.5536	4.1973	5.75	7.0466	0.6487	1.4504	0.7561	0.877	1.1029	0.8775	1.0658	2.907	1.3691	1.7817	0.3826	1.0993	0.4581	1.1913	0.7878
NDUFA5	9.6615	19.2279	7.5932	27.0965	10.6495	11.2048	5.7074	5.7597	16.049	14.8136	9.8534	11.1818	10.9034	12.0422	14.4079	13.4693	7.3359	13.4154	19.835	16.9891	20.3385	8.2254	7.1114	9.0401	9.7622	14.8985	13.6776	8.9748	9.4003	10.8319	8.0732	15.1787	15.791	18.5013	14.1161	8.3861	8.6971	11.1648	9.6738	13.0705	14.9857	13.0552	16.424	17.7682	9.7183	10.075	15.9321	10.5928	13.5298
OGFOD1P1	0.0601	0.1441	0.2117	0.0351	0.1037	0.1638	0.1506	0.2288	0.0222	0.0449	0.0209	0.1224	0.0593	0.1954	0.0846	0.0205	0.1613	0.0603	0.0849	0.2377	0.1521	0.2778	0.0957	0.1786	0.1607	0.1019	0.1636	0.2241	0.1028	0.1083	0.0966	0.0537	0.1421	0.2789	0.0807	0.2275	0.1567	0.0227	0.0615	0.0791	0	0.0246	0.1926	0.1198	0.1762	0.0552	0.1096	0.1778	0
PTTG3P	0.0789	0.1747	0.0759	0.023	0	0.0307	0.0719	0.0215	0.0873	0.0589	0.11	0.2858	0.0692	0.1081	0.1185	0.1349	0.1589	0.0528	0	0.0806	0.0726	0.096	0.058	0.1117	0.0576	0.0765	0.1011	0.1421	0.1201	0.1896	0.0423	0.0282	0.0207	0.0386	0.1413	0.0427	0.095	0.1194	0.0462	0.0208	0.0322	0.1938	0.0799	0.236	0.0695	0.1633	0.0767	0.0778	0.396
AL139393.2	1.3108	1.4461	1.4452	1.0749	3.6888	1.4167	0.947	1.2272	2.6045	2.0905	1.7933	1.6519	1.1703	1.4714	2.1325	0.3796	0.5468	2.1638	1.176	1.1333	2.1955	1.6838	0.9261	1.1098	1.2917	3.3196	1.1952	1.7797	1.4192	1.6797	0.6899	1.1907	2.0354	1.8639	1.8746	1.6737	1.052	3.162	2.4747	1.1688	2.5764	3.5385	1.4901	2.0481	1.0253	2.2096	1.5101	1.5764	0.5333
RNU1-23P	0	0	0	0.0969	0.0955	0	0	0	0	0	0	0	0	0	0	0	0	0	0	0	0	0	0	0	0	0.0805	0	0.1708	0	0	0	0	0	0.2434	0	0	0	0	0.0972	0	0	0	0.2241	0	0	0	0	0	0
AC006960.2	0	0.0332	0.0289	0	0.1036	0	0	0	0	0	0.0314	0	0	0	0	0	0	0	0	0	0	0	0	0.0255	0	0	0	0.0232	0	0.0433	0	0.2898	0.1183	0	0	0	0	0	0	0	0	0	0.0608	0	0.0528	0.1035	0.0438	0	0
AC019322.2	0	0	0.1042	0	0	0	0	0	0.12	0	0	0	0	0	0	0	0	0	0	0	0	0	0	0	0	0	0	0	0	0	0	0	0	0	0	0	0	0	0	0	0	0	0	0	0	0	0	0.107	0
OR4M2	0	0	0	0	0	0	0	0	0	0	0	0	0	0	0	0	0	0	0	0	0	0	0	0	0	0	0	0	0	0	0	0	0	0	0	0	0	0	0	0	0	0	0	0	0	0	0	0	0
MIR1972-1	1.8634	3.4366	3.1837	3.2617	1.4293	1.6936	0.566	2.5345	2.0617	3.2475	0.649	3.0931	1.9066	5.528	1.2826	0	1.2505	2.2845	5.0449	4.9146	2.2867	4.8362	0.9133	2.9889	1.2079	5.4187	0.5968	1.7571	1.1811	1.7908	0.8323	4.8858	3.4272	1.0623	2.9654	0.672	0.2493	0.3132	3.2722	0.4905	0.7613	8.3905	1.886	2.8892	1.6398	1.1422	1.3591	2.2464	0
HMBOX1-IT1	0.379	0.2034	0.4857	0.1206	0.1982	0	1.7584	0.075	0.0508	0.3088	0.288	0.312	0.1209	0.1887	0.3105	0.1885	0.2312	0.1843	0.3407	0.387	0.2537	0.1006	0.0676	0.1951	0.067	0.4676	0.2649	0.2127	0.1048	0.1987	0.0739	0.0493	0.1811	0.2694	0.329	0.1864	0.1106	0.139	0.6051	0.1088	0.732	0.6206	1.395	0.0916	0.1617	0.0634	0.067	0.0906	0
AC104131.1	0	0	0	0	0	0.0468	0	0	0	0	0.0279	0	0	0	0	0	0	0	0	0	0.0184	0	0	0	0	0	0	0.0103	0	0.0096	0	0	0	0	0	0	0	0	0	0	0	0	0	0	0	0	0	0	0
AL132642.1	0	0	0	0	0.0249	0	0	0.0235	0	0	0	0.0196	0	0.0296	0	0	0	0.0289	0	0	0	0	0.0212	0	0.2523	0	0	0.0222	0.0329	0	0	0	0.0227	0	0	0	0.0347	0	0	0	0	0	0.0292	0.0575	0	0	0	0.0284	0
AC008278.2	0.3508	0.4745	0.4121	0.0682	0.2018	0.501	1.2788	0.2227	0.8194	1.3538	1.1811	0.5294	0.3589	0.3202	0.6805	0.2799	0.3924	0.7429	0.1239	0.0895	1.6682	1.5933	0.7451	0.8606	0.5116	0.9351	0.749	0.3909	0.3113	0.5057	0.9401	0.669	1.8435	0.4571	0.5583	1.1703	0.657	0.5897	0.4791	0.1847	0.8599	0.5744	2.6827	4.5457	0.4116	0.5645	0.9382	0.5383	7.0895
AL391121.1	7.8618	6.2379	7.0078	4.1889	7.842	5.2615	0.8885	7.1948	6.9954	4.4621	5.7544	6.428	4.7494	6.6505	5.444	4.8737	7.4829	3.2363	4.2944	5.5018	7.6194	5.7969	5.9255	5.7003	5.7396	3.1789	5.5527	4.1759	6.944	6.8826	11.3728	13.665	4.7414	3.5862	8.1882	5.725	7.1705	5.9264	4.3996	5.4877	2.9259	2.0608	6.9614	7.0677	4.1807	5.8186	6.9213	6.7842	0.9487
RPL23AP91	0.0263	0	0	0.0307	0.0605	0	0.0479	0	0.1163	0.0393	0.1098	0	0	0	0.0197	0	0.0353	0.0351	0	0	0.0484	0	0.0515	0.1488	0	0	0	0.1892	0.04	0	0.0282	0	0.0276	0	0	0.0284	0	0.0265	0.0308	0.0277	0	0.0861	2.1632	0	0.1233	0	0	0.0346	0.1318
POLR3KP1	0	0	0	0	0	0	0	0	0	0	0	0	0	0	0	0	0	0	0	0	0	0	0	0	0	0	0	0	0	0	0	0	0.0367	0	0	0	0	0	0	0	0	0	0	0	0	0	0	0	0
AC002116.1	0	0	0	0	0	0	0	0	0	0.0158	0.0737	0.0192	0	0	0.0079	0.0145	0	0.0566	0.0299	0	0	0	0	0	0	0	0.0136	0	0	0.0102	0	0.0151	0.0556	0.0103	0	0	0.017	0	0.0124	0.0111	0	0.0347	0	0.0281	0.0124	0	0	0.0278	0
AC022568.1	0	0	0	9.1706	0.0149	0	0.0473	0.0141	0.0191	0	0.1265	0	0.0114	0	0	0	0	0.2255	0	0	0	0	0.0127	0	0	0	0	0.0267	0	0.0125	0	0	0	0	0	0.0281	0	0.1831	0	0	0	0.0212	0.1225	0	0.0152	0	0	0	0.0217
AC055811.4	0.409	1.5992	1.2666	0.5011	0.6353	1.2002	0.0373	0.9495	0.3218	0.6619	0.2089	0.5123	0.562	0.336	0.2662	0.5408	0.5581	0.4741	1.2422	2.1436	0.8031	1.9041	1.6171	0.6715	1.5841	0.5418	0.7685	1.2692	0.3733	0.7075	0.4896	0.6337	0.1863	0.1532	1.1065	0.9809	0.569	0.11	0.6464	1.1197	0.2785	0.1674	0.69	0.0906	0.5679	0.9778	0.8419	1.1296	0
TMEM126A	10.6022	13.1174	10.3986	21.5109	16.0517	11.1469	72.9621	14.002	14.2783	12.0855	17.8589	13.691	15.7561	14.0111	12.5747	12.0261	14.6932	25.8896	15.9676	13.6151	20.4004	10.0191	5.3836	10.8473	4.7293	17.7611	10.9798	17.3539	10.8274	9.1123	5.9267	12.4862	10.3273	33.1186	8.6714	11.8173	10.3374	29.0096	18.9424	4.188	39.1201	43.5309	18.2295	15.1051	21.2099	13.4164	8.4062	10.1539	63.9459
SHC1P1	0	0	0	0	0	0	0	0	0	0	0	0	0	0	0.0051	0	0	0	0	0	0	0	0.0269	0	0	0	0	0.0141	0	0	0.0073	0	0	0.0067	0	0.0148	0	0	0	0	0	0	0.0092	0	0	0	0	0	0
SAG	0.004	0.0059	0.0103	0.0082	0.0081	0.0031	0.011	0.0033	0.0074	0.0015	0.0126	0.0027	0.0053	0.0014	0.003	0.0041	0.0054	0.0081	0.0156	0.0062	0.0056	0.0039	0.0049	0.0251	0.0098	0.0127	0.0077	0.0207	0.0015	0	0.0011	0.0086	0.0011	0.0069	0.0012	0.0065	0.0178	0.0071	0.0059	0.0053	0.0115	0.0099	0.167	0.0027	0.013	0.0046	0.0029	0.0013	0.0084
AL356867.1	0	0	0	0	0	0	0	0	0	0	0.0557	0	0	0	0	0	0	0	0	0	0	0	0	0	0	0	0	0.0411	0	0	0	0	0	0	0	0	0	0	0	0	0	0	0	0	0	0	0	0	0
HSF4	1.4225	0.0587	0.1128	0.1889	0.1927	0.0531	0.1346	0.0371	0.5404	0.0254	0.2097	0.1105	3.6954	0.0272	1.6417	1.169	0.0534	0.3949	0.0201	0.1073	0.0889	0.094	0.1475	0.0739	0.0414	0.0578	0.0327	0.184	0.0389	0.0518	0.0183	0.0731	1.6174	0.0916	0.0203	0.0676	0.0182	0.0372	0.0931	0	0.1438	0.0139	0.1073	0.0491	0.2365	0.0131	0.0249	0.0299	0.019
RNU6-1310P	0	0	0.1432	0	0	0.1741	0	0.1216	0.1649	0.1669	0	0.2024	0	0	0	0.3057	0.15	0	0.3157	0	0	0.1088	0	0.3796	0.2173	0.1083	0.2863	0	0.68	0.3222	0.1198	0.1598	0	0.1092	0.1334	0	0	0	0.2616	0.353	0	0	2.262	0	0.1311	0.3082	0.1087	0.2939	0
MIR548AZ	0	0	0	0	0	0	0	0	0	0	0	0	0	0	0	0.1722	0	0	0	0	0	0	0	0	0	0	0	0	0	0	0	0	0	0	0	0	0	0	0	0	0	0	0	0	0	0	0	0	0
RNU7-92P	0	0	0	0	0	0	0	0	0	0	0	0	0	0	0	0	0	0	0	0	0	0	0	0	0	0	0	0	0.2393	0	0	0	0	0	0	0	0	0	0	0	0	0	0.2123	0	0	0	0	0	0
AC015909.4	0	0	0	0	0	0	0.0754	0.0225	0.061	0	0.0576	0.0187	0.0181	0	0.0155	0	0	0.0277	0.0584	0	0	0.0403	0	0.0234	0	0.0401	0	0	0.0315	0	0	0	0	0	0	0	0	0	0	0	0	0.0339	0.1396	0	0	0	0	0.0544	0
PPP2R2DP1	0	0	0	0	0	0	0	0	0	0	0	0	0	0	0.0141	0	0.0252	0	0	0.0192	0	0.0365	0.0368	0.0213	0.0183	0	0.024	0.0193	0	0.0361	0	0	0	0	0.0224	0.0203	0	0	0	0	0	0	0	0	0	0.0345	0.0183	0.0247	0
MIR3164	0	0	0	0.3362	0.663	0.4489	0	0.1568	0	0	0	0.2609	0	0	0	0.197	0	0	0	0	0	0	0.1412	0	0	0	0	0.1482	0	0	0	0	0	0	0	0	0.2312	0	0	0	0	0	0	0	0.169	0.1325	0.1401	0.1895	0
CBR1	6.686	4.8747	8.6865	3.1721	9.4387	3.4673	13.3154	9.3888	9.3379	5.1835	7.2615	10.2911	11.1067	9.8029	8.7104	4.0119	7.6116	10.2085	7.652	10.0298	13.2687	7.3907	7.8122	5.6308	6.7998	3.8791	6.9588	8.9462	7.8994	7.0493	5.7807	11.6352	7.032	8.4373	2.2193	8.4747	6.9563	9.0512	10.2612	6.2847	15.6399	15.2227	8.2852	6.7519	10.5419	9.3647	5.5574	7.4517	8.6682
AC092574.1	1.6796	2.6042	2.0429	2.5248	2.1618	2.7057	1.4009	2.5401	2.6039	5.7412	3.7679	2.5776	1.8975	7.9129	2.8216	2.6869	2.713	3.3887	9.6511	4.5631	6.4981	2.9647	2.7906	2.2886	3.6538	3.5322	5.179	3.4556	1.8622	3.8303	3.1127	4.3158	6.0138	10.6003	2.2086	2.4949	1.7822	1.3494	4.0327	5.4856	1.7679	3.1697	2.4588	21.9441	3.5073	5.4444	3.2668	5.1293	3.5709
RNA5SP430	0	0	0	0	0	0	0	0	0	0	0	0	0	0	0	0	0	0	0	0	0	0	0	0	0	0	0	0	0	0	0	0	0	0	0	0	0	0	0	0	0	0	0	0	0	0	0	0	0
AP000926.1	0.1317	0.1554	0.675	0	0.3636	0.041	0.336	0.1433	0.0777	0.1967	0.0367	0.2861	0.1155	0.6852	0.2769	0.2522	0.2828	0.3522	0	0.242	0.1454	0.1282	0.2323	0.1193	0.0768	0.2298	0	0.1896	0.0801	0.0506	0.0565	0.0377	0	0.1287	0.0943	0.0855	0	0	0.4317	0.0832	0.5595	0.345	0.2132	0.14	0.0309	0.1211	0.0768	0.4156	0
NACAP6	0	0	0	0	0	0.03	0	0	0	0	0	0	0	0.0263	0	0	0	0	0	0	0	0.0374	0	0	0	0	0.0246	0	0	0	0	0.0275	0	0	0.0688	0	0	0	0	0	0	0	0	0	0	0	0	0	0
AC138207.5	2.3387	0.6039	1.2737	2.2856	3.1617	0.6377	1.1189	0.7316	1.0782	1.3101	1.0182	1.0058	0.7692	0.9206	0.6805	0.3599	0.6671	3.7926	0.4542	0.5671	4.9508	3.2151	0.6878	1.9529	0.4264	2.1537	1.2734	0.9022	1.2008	1.9667	1.1281	2.5504	2.0278	2.8856	2.1284	3.0364	0.0469	0.7371	1.985	0.3386	2.341	1.5318	1.1441	0.4662	0.6174	1.8546	0.995	1.9608	1.7113
AC022150.1	0	0	0	0	0	0	0	0	0	0	0	0	0	0	0	0	0	0	0	0	0	0	0	0	0	0	0	0	0	0	0	0	0	0	0	0	0	0	0	0	0	0	0	0	0	0	0	0	0
MOCS1P1	0	0	0	0	0.0085	0	0	0.0242	0	0.0111	0	0.0201	0	0	0	0	0	0	0	0	0	0	0.0073	0.0084	0	0	0	0.0153	0	0.0143	0	0	0	0.0072	0.0089	0.008	0	0	0	0	0.0121	0	0.04	0.0197	0	0	0	0	0
LINC00858	0.3696	0.1226	0.2395	0.0097	0.1481	0.0712	0.1287	0.2847	0.9068	0.5708	0.6017	0.3873	0.3642	1.052	0.9355	0.4715	0.2174	0.2277	0.1643	1.3483	0.8945	0.772	0.1954	0.0141	0.0121	0.9098	0.5214	0.1025	0.537	0.2594	0.2359	0.784	0.096	1.0431	0.6047	0.5752	0.1667	0.4523	0.0778	0	0.2851	0.102	0.9864	0.8997	0.0633	0.4086	0.4766	0.3223	0.1667
AC025287.1	0	0.0221	0.0192	0	0	0	0	0	0	0	0.0209	0.0271	0	0	0	0.0205	0	0	0	0	0	0	0	0	0	0	0	0	0	0.0288	0	0	0	0	0	0	0	0	0	0	0	0	0.0202	0	0	0	0	0	0
TRIM60P8Y	0	0	0	0	0	0	0	0	0	0	0	0	0	0	0	0	0	0	0	0	0	0	0	0	0	0	0	0	0	0	0	0	0	0	0	0	0	0	0	0	0	0	0	0	0	0	0	0	0
PSCA	0.0543	0	0.0521	0.095	0.1014	0.0528	0	0.0074	0.03	0.0203	0.0756	0.0184	0.0178	0.0093	0.0764	0.0278	0.0273	0.0363	0	0	0.0499	0	0.1197	0	0	0.0197	0.0087	0.6418	0.0103	0	0.0145	0.0485	0.0214	0.0265	0	0.0367	0.0218	0.0205	0	0.0071	0.0111	0.1222	0.0366	0	0.0159	0.0125	0	0.0178	0
FABP7P2	0.0631	0.0931	0.0404	0	0.1452	0.0492	0.1725	0	0	0	0	0.0571	0	0.0432	0.0237	0.0432	0.0847	0.0844	0.0446	0.2577	0.1161	0.1535	0	0.1786	0.2147	0	0.0404	0.0974	0	0.091	0.0676	0.1354	0.1326	0	0	0.0683	0.0506	0	0	0.0332	0.0516	0.155	0.2129	0	0.111	0.203	0.0307	0.0415	0
AC018521.3	0.0147	0.0432	0.0376	0	0	0	0.0267	0	0.0216	0.1532	0.0204	0	0.0129	0.1003	0	0.02	0.0197	0.0196	0.0414	0.0299	0.0809	0	0.0287	0.0995	0.0142	0.0284	0	0.0452	0.0223	0.0282	0.0471	0.021	0.0308	0	0.0175	0.0634	0	0.0887	0.0343	0	0	0	0.1977	0	0.0172	0	0.0142	0.0385	0
CYP2C59P	0	0	0	0	0.2046	0	0	0	0	0	0	0	0	0	0	0	0	0	0	0	0	0	0	0	0	0	0	0	0	0	0	0	0	0	0	0	0	0	0	0	0	0	0.06	0	0	0	0	0	0
AL359265.1	0.0602	0.0444	0	0	0.0519	0.0234	0.1645	0.0164	0.0444	0.2247	0.021	0.0272	0.066	0.1442	0.0565	0.0823	0.0404	0.0201	0.085	0.0921	0.1661	0.0878	0.0147	0.2384	0.1609	0.0292	0.0193	0.0619	0	0.0723	0.0484	0.1075	0.3003	0.2205	0.1436	0.1627	0	0.0152	0.088	0.2217	0.0246	0.0739	0.2436	0.2399	0.0176	0.0691	0.0146	0.0791	0.1006
TMEM196	0.0117	0	0	0.0171	1.7873	0.0046	0.2879	0	0	0.0262	0	0	0	0	0.0022	0	0.0079	0.0039	0	0	0	0.0028	0	0	0.0028	0	0	0.009	0	0	0	0	0	0	0	0	0	0.0148	0	0	0.9705	0	0.0276	0	0.0034	0	0	0	0
KLF17	0.0038	0	0	0	0.0264	0.0059	0	0	0.1915	0.0057	0.0266	0	0	0	0	0	0.0205	0.0204	0.0108	0	0.2952	0.0186	0.0037	0	0.0037	0.0296	0	0.0354	0	0.0037	0.0082	0.0492	0.008	0	0.0046	0.0041	0	0.0077	0	0.008	0.0187	0.0125	0.0567	0	0	0	0	0	0
FBXL8	0.8328	0.0507	0.3231	0.263	0.1538	0.1071	0.0627	0.1704	0.4508	0.1027	0.2022	0.1591	1.3133	0.0732	0.2553	0.4232	0.0513	0.3679	0.0054	0.1599	0.4641	0.1153	0.2734	0.1211	0.0966	0.1037	0.0979	0.11	0.0988	0.2313	0.0983	0.4698	0.8832	0.0635	0.0957	0.1323	0.0674	0.0539	0.1342	0.0563	0.1373	0.0438	0.1856	0.1168	0.1748	0.0667	0.0557	0.0854	0.0256
AL592466.1	0	0	0	0	0	0	0	0	0	0	0	0	0	0	0	0	0	0	0	0	0	0	0	0	0	0	0	0.0801	0	0	0	0	0	0.0381	0	0	0	0	0	0	0	0	0.0526	0	0	0	0	0	0
OR52E8	0	0	0	0	0	0	0	0	0	0.0168	0	0	0	0	0	0	0	0	0	0	0	0	0	0	0	0	0	0	0.0171	0	0	0	0	0	0	0.0122	0	0	0	0	0	0	0	0.015	0	0	0	0	0
RNU6-974P	0	0	0	0	0	0	0	0	0	0	0	0	0	0	0	0	0	0	0	0	0	0	0	0	0	0	0	0.2278	0	0	0	0	0	0	0	0	0	0	0	0	0	0	0.1494	0	0	0	0	0	0
SNORD1B	0.427	1.2601	0.1824	0	0	1.3307	2.0754	0.1549	1.4699	0	0.5949	0.5155	0.6242	0.1949	0.1069	0.1947	0.5732	0.7615	1.4075	1.8892	1.5721	0.8312	0.6977	0.4835	0.8304	0.138	0.3647	0.7321	0	0.4104	0.4577	0	0.5984	0	0.1699	0.308	0.2285	0.2871	0	0.5995	0	0	0.1921	0.1892	0	0.3926	0.8305	0.936	0.9522
AL355838.1	0	0	0	0	0.0492	0	0.039	0	0	0	0.0596	0	0	0	0	0	0	0	0	0.0218	0	0	0	0.0242	0	0	0	0.022	0	0	0	0.0306	0	0	0	0	0	0	0	0	0	0	0.2887	0	0	0	0	0.0281	0
AC105914.1	0	0	0	0	0	0	0	0	0	0	0	0	0	0	0	0	0	0.1415	0	0	0	0	0	0	0	0	0	0	0	0	0	0	0	0	0	0	0	0	0	0	0	0	0	0.0703	0	0	0	0	0
AC110767.1	0.05	0	0	0	0	0	0	0	0	0.2242	0	0	0	0	0	0	0	0	0	0.0511	0	0.0487	0	0	0	0	0	0.1544	0	0	0	0	0.1052	0	0.0597	0	0	0	0	0	0	0	0	0	0	0	0	0	0
MTCO1P18	0	0	0	0.0197	0	0.0131	0.0154	0	0	0	0	0	0	0	0	0	0	0.0225	0	0	0	0	0	0	0	0	0	0	0	0	0	0	0	0	0	0	0	0	0	0	0	0	0.0114	0	0	0	0	0	0
TAF2	7.6449	10.1315	11.8371	9.7884	9.8063	12.8957	10.262	8.5273	10.2003	8.4383	10.521	6.505	8.854	10.7901	9.9749	9.9947	6.2213	6.4631	9.8262	10.2941	7.6582	8.4518	11.5095	8.6663	10.4537	11.4148	12.3513	11.2871	8.7571	10.1588	10.7633	9.3925	4.9904	8.4637	13.9637	12.644	10.6618	8.7523	9.2748	11.4246	8.6821	8.1278	8.1775	4.3665	10.1892	11.1799	9.9651	12.2806	4.5663
LCN1	0.0765	0.2485	0.1177	0.0179	0.0176	0.0716	0.1674	0.0167	0	0.1372	0	0.0416	0.0537	0.1048	0.069	0.3351	0.0616	0.5324	0.2379	0.4689	0	0.1341	0.045	0.3814	0.0447	0.0594	0.0785	2.1261	0.0699	0.5738	0.0328	0.0657	6.3877	0.1047	0.1645	0.0994	0.2212	0.1235	0.0538	0.1128	0.1751	0.0251	0.0207	0.0203	5.1195	0.2252	0.6104	0.0403	0.1536
AL139246.4	0.0233	0	0.0596	0	0.1606	0.0362	0.1696	0.1012	0	0.1738	0.5185	0.0211	0.0408	0.0637	0.0699	0.0636	0	0.0622	0	0.0237	0	0.3396	0	0	0	0.2255	0	0.0479	0.0708	0.0447	0.0249	0.0333	0.2445	0.0227	0.1111	0	0.0747	0.1408	0.0272	0.0245	0	0.2285	0.0628	0.0618	0	0.0428	0.0226	0.0918	0
RPS5P3	0	0.1432	0.0249	0.0453	0.0223	0	0.1061	0	0.0286	0	0.0811	0.0351	0.034	0.0266	0.0291	0	0	0.2077	0.0274	0.0793	0.0357	0.0189	0.019	0.022	0	0.0188	0.0249	0.0998	0	0.0373	0	0	0.0612	0	0	0	0	0.0587	0.0454	0.0204	0.1269	0.0318	0.1048	0	0	0.0714	0	0	0.4545
KRASP1	0.0217	0	0	0	0.0249	0.0337	0	0	0	0	0	0.0196	0	0	0	0	0	0	0	0.0221	0	0	0	0	0.0211	0	0.0278	0	0	0	0	0	0	0	0	0.0234	0	0.0437	0	0	0	0.0355	0.1169	0	0	0	0	0	0
RPS18P1	0.0261	0	0	0.0914	0.03	0	0.2379	0.0284	0	0.117	0	0.0236	0	0.0715	0	0	0.035	0.0698	0.1106	0.0267	0.0961	0.0254	0	0.0591	0.0254	0	0	0.0537	0.0397	0.0251	0.028	0	0	0.0255	0.0312	0	0	0	0.0306	0.0275	0.0427	0	0.4932	0	0	0.024	0	0.0343	0.4803
SMC5	4.4966	10.4805	8.8925	4.2529	7.5654	10.0852	6.5931	7.6628	5.1373	7.1155	5.8003	6.9257	7.4321	6.258	6.5349	12.4096	5.7186	4.6792	12.3751	6.8439	5.747	11.5476	11.0161	7.6819	8.4867	6.9519	7.464	8.2913	10.8418	10.4279	6.7686	7.7527	3.3702	3.854	12.3961	9.0635	8.1518	6.2354	5.4055	14.339	5.373	3.6312	7.3397	10.8818	6.9628	9.0538	16.6992	8.3967	2.326
FCRL6	0.3089	0.0132	0.0688	0.0522	0.0464	0.1883	0	0.0487	0.033	0.0267	0.0561	0.0324	0.0275	0.0613	0.0504	0.0306	0.024	0.1257	0.0379	0.1051	0.0989	0.1525	0.0307	0.0507	0.1785	0.0477	0.1147	0.023	0.0136	0.0946	0.0672	0.128	0.16	0.0875	0.0107	0.0823	0.0862	0.0135	0.0367	0.0047	0.0512	0.0147	0.1148	0.1368	0	0.0617	0.0958	0.0177	0
AC079584.2	0	0	0.119	0	0	0	0	0	0	0	0	0	0	0.0636	0	0	0.0312	0	0	0	0.0427	0.0226	0	0	0	0	0	0	0	0.0223	0	0	0	0.0681	0	0	0	0	0	0	0	0	0.0313	0.1851	0	0	0	0	0
NT5C1B	0.048	0.2345	0.1921	0.007	0.0345	0.2103	0.0055	0.1012	0.0619	0.112	0.1253	0.1005	0.0658	0.3244	0.0968	0.082	0.1972	0.0562	0.0847	0.1623	0.0607	0.3094	0.147	0.1902	0.2245	0.0988	0.1037	0.1203	0.1277	0.1412	0.1318	0.0472	0.0378	0.1055	0.1181	0.0876	0.0866	0.1361	0.0878	0.1516	0	0.0246	0.174	0.3507	0.0281	0.1737	0.0875	0.1104	0.0903
AC016907.1	0	0	0	0	0	0	0	0	0	0	0	0	0	0	0	0	0	0	0	0.0281	0	0	0	0	0	0	0	0	0	0	0	0	0	0	0	0	0	0.0277	0	0	0	0	0	0	0	0	0	0	0
RF01968	0	0	0	0	0	0	0	0	0	0	0	0	0	0	0	0	0	0	0	0	0	0	0	0	0	0	0	0	0	0	0	0	0	0	0	0	0	0	0	0	0	0	0	0	0	0	0	0	0
RNU6-901P	0	0	0.1445	0	0	0	0	0	0	0	0	0	0	0	0	0	0	0	0.1593	0	0	0.1098	0	0	0	0	0	0	0.1716	0	0	0	0	0	0	0	0	0	0	0	0	0	0	0	0	0	0	0	0
FAM172BP	0	0	0.0141	0	0.0126	0	0.04	0	0	0.0328	0	0	0	0	0	0	0	0	0.0155	0	0	0.0107	0	0.0124	0	0	0	0.0226	0.0167	0	0	0	0	0	0.0131	0	0.0176	0	0	0	0.0179	0.0539	0.0445	0.0292	0.0129	0	0	0.0144	0
AL121835.1	0	0	0	0	0	0	0	0.0368	0	0	0	0	0	0	0	0	0	0.0452	0	0.069	0	0	0	0	0	0	0	0.0695	0	0.0649	0.0362	0	0	0	0	0	0	0	0.0395	0.0711	0	0.1106	0.0912	0	0.0396	0.0932	0	0.0444	0.3954
RN7SL317P	0	0	0	0	0.0418	0	0.0662	0.0791	0	0.0543	0	0	0.0319	0	0	0	0	0	0	0.1855	0	0	0	0	0	0	0	0.0374	0	0	0	0.052	0	0	0	0.0393	0	0	0	0	0	0	1.1771	0	0	0	0	0	0
RF00019	0.3552	0.524	0	0.4144	0.5448	0	2.3734	0.2576	0	0	0.1649	0	0.1038	0.1621	0	0.1619	0.6356	0.95	0.1672	1.2086	0.2179	0	0	0.2681	0.2302	0.2295	0	0.2436	0.1801	0.1138	0.2538	0.5079	0.1244	0.1157	0.1413	0	0	0	0	0.6233	0.1935	0.1938	3.0354	0.1573	0	0	0	0.1557	0.594
LINC01863	0	0	0	0	0.1114	0	0	0	0	0.0723	0	0	0	0	0.0182	0	0	0	0	0	0.2228	0.0236	0	0.0274	0	0.0235	0	0	0	0	0	0.2077	0.0254	0	0	0	0	0.0488	0	0	0	0.0396	0.0327	0	0	0	0	0	0.3238
BNIP3P4	0	0	0	0	0	0	0	0	0	0	0	0	0	0	0	0	0	0	0	0	0	0	0	0	0	0	0	0	0	0	0.0227	0	0	0	0	0	0	0	0	0	0	0	0	0	0	0	0	0	0
AL136140.2	0	0	0	0	0.0081	0	0	0	0	0	0	0	0	0	0	0	0	0	0	0	0	0	0	0.0079	0	0	0	0	0	0	0.0075	0	0	0	0	0	0	0	0	0	0	0	0	0	0	0	0.0068	0	0
MIR6719	0.5497	4.0555	1.4089	0.1604	0.1581	0.4283	0	0	0.4055	0.8212	0	0	1.0848	0.1882	0.6192	2.0678	0.3689	0.5514	1.3589	1.4031	0.506	0.6688	0.4042	0.7781	0.4009	0.1332	0.5282	0.1414	1.0454	0.2642	0.1473	0.3931	0.2889	0.5373	0	0.2974	0	0	0	0.1447	0	0	0.5564	0.7306	0.3225	0.5054	0	0.9037	0
AL356289.1	0.0427	0.2049	0.1095	0	0.0123	0.0166	0.0195	0	0.1734	0.016	0	0.1548	0.0562	0	0.0241	0.0438	0	0.0286	0.1509	0.1527	0.2557	0.7384	0.0524	0.1331	0.3117	0.0207	0.0958	0.066	0.0975	0.1643	0.1604	0.2598	0.0112	0.1358	0.4209	0.0578	0.1887	0.0108	0	0.2588	0.0349	0.035	0.1154	0.3976	0.0376	0.2456	0.2494	0.0703	0
VENTXP2	0	0	0	0	0	0	0	0	0	0	0	0	0	0	0	0	0	0	0	0	0	0	0	0	0	0	0	0	0	0	0	0	0	0	0	0	0	0	0	0	0	0	0	0	0	0	0	0	0
AC006369.1	0.0436	0	0.0559	0	0.0502	0	0	0.0237	0	0	0.152	0	0	0.0598	0	0	0.0586	0	0	0.0223	0.0402	0	0	0	0	0	0.028	0	0	0	0	0	0.0229	0.0213	0	0	0	0.022	0	0	0	0	0	0	0	0	0.0212	0	0
BRPF1	3.2244	8.8641	7.2259	2.2392	5.4002	8.4592	1.0305	6.5824	6.9371	6.1343	4.6382	4.3722	4.1336	5.3565	4.8684	5.8975	4.237	3.8629	6.3124	4.8922	5.4813	7.071	8.2347	6.58	7.5226	5.102	8.533	7.9992	6.6454	8.0187	6.9338	7.1342	5.1325	3.755	6.819	6.4954	7.562	3.177	6.3715	8.5443	1.4734	1.7194	4.9936	6.3771	5.7454	7.3785	7.4834	7.7548	0.5404
RPS3AP35	0	0.0226	0.0981	0.0357	0.0352	0.0716	0	0.0167	0.0226	0.0686	0	0.0139	0.0269	0	0.069	0.0628	0	0.0614	0.0216	0	0.0845	0.0149	0	0.0173	0.0149	0.089	0	0.063	0	0.0147	0	0.0438	0	0.0449	0	0.0166	0	0.0309	0	0	0.05	0.0501	0.2892	0.0203	0.018	0	0.0149	0	0.0256
ZNF653	3.1187	1.9293	2.4275	1.1877	2.3463	2.2856	0.6932	1.951	3.4519	2.7758	1.418	2.722	2.1538	3.7891	3.484	2.5119	2.6399	2.2575	2.3638	3.539	3.3471	2.2386	2.2973	3.3548	2.8914	2.6403	2.9003	2.679	1.9065	2.7152	2.7568	2.5487	2.0557	2.1841	1.9973	3.6015	2.657	1.1543	3.1676	3.5089	1.0359	0.9134	1.7695	2.8931	2.499	2.7042	2.3177	2.8296	0.1575
AC097065.1	0	0	0	0.108	0	0	0	0	0	0	0.0967	0.0209	0	0	0	0	0.031	0.0619	0.0327	0	0	0	0	0.1833	0.0225	0.0673	0	0.0238	0	0	0	0	0	0	0	0.05	0	0	0	0.0487	0	0	2.0599	0	0.0543	0	0	0	0
AL049835.1	1.0933	0.7208	0.775	0.4615	0.5888	0.1087	2.2047	0.2025	0.652	1.4943	0.4861	2.1272	0.2244	0.5096	1.5371	0.1273	1.2177	1.0578	0.3614	0.6887	0.8136	0.2038	0.3192	0.2897	0.2714	0.6539	0.2384	0.4068	0.2477	0.1118	0.2244	0.3992	1.1979	0.3183	0.2221	0.3272	0.0747	0.0938	1.1983	0.2204	1.9768	0.7999	2.8881	0.1237	0.3275	0.4064	0.181	0.7036	0.1167
AP000221.1	0	0.0169	0	0.0267	0.0658	0.0178	0.0208	0.0498	0.0337	0	0	0.0207	0.0401	0	0.0172	0.0156	0.0153	0	0.1453	0.0584	0.021	0.0223	0.056	0.0259	0.1	0.0111	0	0.0353	0.0348	0.0439	0	0.0163	0	0	0	0.0247	0	0.0346	0	0	0.0374	0	0.0463	0	0.0402	0.0315	0.0333	0.0301	0
NTRK3	1.3021	0.0415	0.295	0.8262	1.137	0.241	0.0326	0.1454	0.0402	0.2017	0.4017	0.314	0.0114	0.0233	0.2638	0.011	0.0432	0.1172	0.1528	0.0151	0.4764	0.0735	0.4688	0.1073	0.0595	0.6222	0.0183	0.2271	0.1285	0.4815	0.1145	0.2001	1.4708	0.0555	0.0325	0.5049	0.0524	0.2069	0.0748	0.048	0.2893	0.6653	0.0615	0.0131	0.0115	0.1015	0.0187	0.0605	0.0396
GLT6D1	0	0	0	0	0.018	0	0	0.0085	0	0	0	0	0.0137	0.0107	0	0	0	0.0314	0.0221	0.016	0.0577	0	0	0.0355	0	0.0076	0.01	0.0081	0.0238	0.0151	0	0.1905	0	0.0383	0	0	0	0	0	0	0	0	0.0846	0.0104	0	0.0072	0	0	0
FLJ20021	7.5676	1.7418	2.2692	9.2017	3.6742	2.7826	4.5791	5.9288	4.7558	3.6854	4.0274	7.1395	7.619	4.7871	2.3979	3.1467	7.232	12.4694	2.48	4.4193	8.5532	3.4027	1.7655	4.4556	1.8836	3.1689	4.6924	4.8732	1.7499	4.0291	2.1578	6.234	6.0286	7.6768	2.1136	2.1124	3.3283	3.4038	3.6146	1.3387	4.8479	9.6154	2.5327	4.4856	6.8548	2.143	2.8848	4.6179	6.632
AL591222.1	0.0093	0.0184	0.008	0.0944	0.0537	0	0.0113	0.0745	0.0092	0.0046	0.0087	0.0084	0	0	0.0304	0	0.0083	0.1123	0.0176	0	0.0401	0.003	0.0122	0.0141	0.0091	0.0935	0.0159	0.192	0.0284	0.006	0.0333	0.04	0.0098	0.0061	0.0111	0.0067	0	0.1004	0	0.0491	0.0457	0.0102	0.1385	0.0703	0.1825	0	0.003	0	0.0156
AL356740.2	0	0.0273	0.0237	0	0.0213	0	0	0.0201	0.0818	0.0276	0.0772	0	0.081	0	0.0416	0	0.0248	0	0.0261	0.0566	0	0.0719	0.0362	0.0837	0.0719	0.0896	0.0474	0.038	0.0843	0.0355	0.0396	0	0.0194	0	0.0441	0	0.0297	0	0	0.0584	0	0	0.0249	0	0.0434	0.085	0.018	0.0486	0
LINC02226	0.0226	0	0	0	0.0087	0	0	0.0082	0	0	0	0	0.0198	0.0309	0	0.0206	0	0	0.0106	0	0	0	0	0.0085	0.0366	0	0	0.0155	0	0.0072	0.0485	0.0431	0.0158	0	0	0.0163	0	0	0	0.0159	0	0.0247	0.0508	0	0	0.0208	0.0147	0	0
C19orf33	0.6783	0.4575	0.3228	0.0678	0.4905	0.5435	0.3179	0.1054	0.4574	0.4632	0.027	1.6668	0.2379	0.4511	0.2765	0.2386	0.1561	3.9655	0.2464	0.6133	0.8205	0.6601	0.7029	1.4262	2.6568	0.2442	0.5958	0.7974	0.1179	0.2794	0.6024	1.1363	4.2566	1.4394	0.185	0.4822	0.6221	0.2736	0.2042	0.1836	2.1535	2.6336	0.2877	1.674	0.1364	0.3207	0.9234	0.3823	0.2917
DDX27	10.8218	11.7253	8.4372	5.983	7.8224	10.5317	4.5605	9.5844	7.7383	11.1876	10.0858	10.911	8.4242	10.7853	13.4217	11.8323	8.2963	8.0588	15.2244	12.3503	10.5794	15.5245	9.2013	9.1718	10.8651	9.6658	12.0815	12.3403	9.943	9.7432	10.1582	9.1784	9.0844	6.9059	8.7975	10.5184	11.6941	11.6054	10.6324	13.9443	3.4339	3.4728	7.5873	11.8721	10.5611	15.3449	8.4846	9.3853	1.5244
LYRM2	2.3958	5.4475	3.8538	3.1912	5.3796	4.821	2.8449	3.5438	5.5667	3.6056	2.3934	3.4926	3.2223	4.9648	3.5078	4.8128	2.8181	3.2816	7.0816	4.1633	5.1328	6.1262	4.4012	6.578	6.3547	4.9878	5.8402	4.4457	3.9338	4.3162	5.1052	4.644	2.4513	4.8645	9.5437	7.2008	3.9628	4.8975	4.6014	7.7086	5.1715	4.4236	3.3298	5.7033	3.8326	4.8552	7.5681	4.1219	6.5505
ELOB	111.5115	93.2107	87.1901	164.4878	93.1377	69.0177	252.3676	86.4135	142.3004	167.721	132.0973	158.1248	148.2183	144.3829	137.0169	109.6698	132.0301	187.8308	91.2302	170.391	119.2194	73.7835	63.2898	127.7365	76.5149	164.3569	101.8488	89.1077	116.4248	102.7359	115.8184	77.3606	290.7275	310.719	51.8465	97.8258	114.797	170.9337	153.2808	90.2059	277.8896	329.178	128.8565	173.1342	130.0933	101.9723	81.454	87.2813	448.2537
LRRC24	0.0067	0.01	0.0086	0.0315	0.0543	0.0421	0.0369	0.0367	0.01	0.0403	0.2444	0.0122	0.0414	0.0185	0.0507	0.0554	0.0091	0	0.0095	0.062	0.0373	0	0.0265	0.0229	0.0066	0	0.0173	0.0764	0.0103	0.0389	0.0579	0.0483	0.0355	0	0.0725	0.0803	0.0325	0.0544	0.0158	0.0284	0.0331	0	0.0364	0.0179	0.0713	0.0186	0.0262	0.0355	0
GTF2H5	5.976	5.7138	4.5386	8.8013	4.7167	4.079	5.8231	3.4939	7.9105	7.1293	5.3218	6.9229	5.7904	7.6266	6.4421	5.8087	3.7649	7.8088	7.2335	6.899	7.5818	4.8082	1.5589	7.0577	5.6489	6.6355	6.6567	4.9012	4.3692	4.6173	3.6904	5.55	6.3915	14.3205	5.576	7.8196	4.4665	9.4439	5.8061	5.6025	9.8757	10.4994	4.3332	4.8133	5.2865	5.0111	6.6849	3.9706	10.5292
AC008700.1	0.0326	0.0161	0.0418	0	0	0	0.0595	0.0237	0.0161	0.065	0.0152	0.0296	0.0286	0.0447	0	0.0595	0.0876	0.131	0	0.1	0.1602	0.0424	0.0213	0.0246	0.0212	0.0422	0.0139	0.0112	0	0.0105	0.0233	0.0622	0.0229	0.0532	0.0649	0.0118	0.0175	0	0	0.0229	0	0.0356	0.0147	0.0145	0.0128	0.02	0.0106	0.0429	0
AC004080.5	0.065	0.8629	0.916	0	0.1869	0.6075	0	0.2828	0	0.1456	0.1811	0.1471	0.3134	0.089	0.3416	0.0889	0.0872	0	0.2295	0.199	0	0.1581	1.4332	0.4415	0.158	0.189	0.2914	1.504	0.346	0.6557	1.2538	0.0929	0	0.1588	1.1246	0.5273	0.3129	0.1638	0.4184	0.1368	0.0531	0.0532	0.2631	0.3023	0.8387	0.1792	0.2212	0.6837	0
RBMY2UP	0	0	0	0	0	0	0.0673	0	0	0	0	0	0	0	0	0	0	0	0	0	0	0	0	0	0	0	0	0	0	0	0	0	0	0	0	0	0	0	0	0	0	0	0	0	0	0	0	0	0
AC090971.3	0.402	0.6948	0.6623	0.4825	0.3304	0.3042	0.5443	0.2375	0.4575	0.3432	0.6081	0.7696	0.2921	0.4089	0.5175	0.2985	0.2467	0.7681	0.3894	1.3133	1.3954	0.3577	0.3153	0.2601	0.3909	0.6903	0.4414	0.5671	0.1223	0.5409	0.1847	0.3778	0.7846	0.999	0.2468	0.2858	0.7743	0.1043	0.9547	0.3024	0.3191	0.3197	0.2635	0.29	0.3908	0.3591	0.4133	0.4683	0.1345
IL27RA	9.8455	1.6736	3.8175	1.6675	1.2865	1.044	1.0668	3.0703	1.2923	3.3649	2.5083	4.0788	6.2485	2.7912	3.6585	3.5227	1.3925	6.8242	1.0777	1.6114	2.9203	1.4733	1.9943	3.3	5.4871	5.4781	2.0376	2.2424	2.6344	2.3315	1.8131	2.4478	2.2655	0.9192	1.5948	3.7866	1.9244	1.2539	4.7305	1.6322	1.3062	2.9611	3.3285	0.794	2.7282	2.4273	1.8529	2.7765	0.3241
AC108019.1	0	0	0	0	0	0	0	0	0	0	0	0	0	0	0	0	0	0	0	0	0	0	0	0	0	0	0	0	0	0	0	0	0	0	0	0	0	0	0	0	0	0	0	0	0	0	0	0	0
SLC25A25-AS1	0.5033	3.2296	1.8628	0.3275	0.6845	1.6382	0.7365	0.6922	1.7774	0.559	0.795	1.2027	0.927	1.8265	0.6743	1.3051	1.5795	1.2536	4.4979	3.5641	1.5325	1.6916	1.5955	1.7497	1.3188	0.6637	1.0354	1.6532	1.4458	1.3629	0.8944	1.0114	2.4696	1.3201	0.815	1.672	0.6396	0.4717	1.1017	2.8604	0.8377	0.6617	1.9946	2.014	0.8868	1.0768	0.9297	1.0383	0.122
DYNLL1P5	0	0	0	0	0	0	0	0	0	0	0	0	0	0	0	0	0	0	0	0	0	0	0	0	0	0	0	0	0	0	0	0	0	0	0	0	0	0	0	0	0	0	0	0	0	0	0	0.1165	0
AC012513.3	2.7406	3.8517	7.8854	1.4309	3.2831	10.9698	2.2966	5.4723	6.0853	5.8075	7.896	3.5915	2.4134	4.325	5.0999	3.4626	2.0629	3.3404	4.1346	6.0286	3.9422	5.5985	10.6351	4.2995	4.3294	4.601	6.4718	6.4114	3.5244	5.55	6.1056	5.4954	4.9232	2.3746	7.9044	4.7197	4.9795	2.0686	3.9757	6.0867	2.3271	1.7579	4.4304	7.6524	5.1184	9.0036	7.6106	7.4909	2.6272
FAHD2A	3.1596	4.3254	3.4836	1.6797	2.5085	3.6042	1.481	2.6044	5.4085	3.402	4.549	3.4837	4.7238	3.676	3.4438	4.5557	3.3683	3.3875	3.8251	10.2139	4.0717	6.3433	2.8883	5.021	3.5318	2.7947	3.9343	4.0558	2.97	4.2231	3.7783	3.1514	4.1725	4.1502	2.892	4.1515	6.1118	3.4632	3.1504	5.4938	3.0974	2.5574	6.2065	4.4151	3.7667	3.8637	3.5406	4.2053	1.4579
HMGN1P20	0.1196	0	0	0	0	0	0	0	0	0.1191	0.0555	0	0	0	0	0	0	0	0	0	0	0	0	0	0	0	0	0.041	0	0.0383	0	0	0	0	0	0	0	0	0	0	0	0	0.1614	0	0	0	0	0	0
CFHR5	0.017	0.0126	0	0.0099	0.0196	0	0.0078	0	0.0314	0	0	0.0039	0	0	0.0032	0	0	0	0.018	0.0043	0	0.0083	0.025	0.0193	0	0.0041	0	0.0394	0.0129	0	0.0046	0.0061	0.0179	0.0125	0	0	0	0.0043	0	0	0.007	0	0.0976	0.0057	0	0	0	0.0056	0
RN7SL318P	0	0	0	0.047	0.0463	0	0	0	0	0	0.0561	0	0	0	0	0	0.1621	0.0538	0	0	0	0	0.0395	0.2279	0	0	0	0.0828	0	0.0387	0	0	0	0.0787	0	0.0436	0	0	0	0.0848	0	0.0659	2.6621	0	0.0945	0	0	0	0
COMMD2	7.4702	11.0145	9.8665	5.5942	12.5497	13.0531	17.4035	10.6611	15.6379	13.5173	8.7182	10.6181	10.8498	12.1058	9.7253	9.7508	6.9387	8.5782	10.7726	10.7326	13.3424	8.5146	11.2018	7.6958	10.0055	9.4215	14.3148	13.6399	11.8095	12.6492	11.6323	17.3271	6.2511	11.2991	13.2869	11.1811	10.7925	10.437	12.2241	13.9566	17.7618	14.9041	10.8054	14.4153	11.7392	12.7409	9.1672	11.8009	24.4161
SLC30A6	7.2182	7.3565	10.6205	7.4044	8.9278	13.5398	7.0049	9.1915	11.5322	11.3376	9.887	8.8287	8.8114	10.6733	10.2192	10.2845	5.6985	6.8666	10.0213	8.9895	6.9325	12.7125	12.4443	13.8184	12.7345	7.4532	15.1227	9.7057	9.2224	12.6273	12.3905	9.5585	4.9313	9.6226	11.0977	8.7781	10.0042	8.1823	9.4052	16.374	8.1194	7.0893	12.1629	8.4564	7.3413	11.8287	13.7359	10.8068	4.5058
AC018692.1	0	0	0	0.0303	0.015	0	0	0	0	0	0	0	0	0	0	0	0	0	0.0184	0	0	0	0	0	0	0	0	0.0134	0	0	0	0	0	0	0	0.0141	0	0	0	0	0	0	0	0	0	0	0	0	0
AL049555.1	0.0062	0	0.0555	0.0289	0.4768	0.0578	0.0225	0	2.1718	0.268	0.0172	0.0224	0	0.0254	0.0418	0	0.3072	0.0993	0.0437	0.0063	0.9565	0	0.8125	0.2872	0.4872	0.1619	0.0713	0.2927	0.3764	0.3983	0.0199	1.2562	0	0	0.0074	0.1071	0	0.0437	0	0.1042	1.4253	0.081	0.0167	1.2495	0.0145	0.0171	0	0.0163	1.5001
TCEAL1	14.8825	6.8715	5.2603	16.5219	11.8589	6.8377	16.9902	8.9254	8.5002	12.8554	8.3082	7.1631	8.0446	7.1434	5.3016	5.8395	6.7119	16.5706	7.3905	11.689	14.9205	6.1817	6.5993	5.9747	4.4267	6.3376	5.3833	9.0444	8.527	7.0294	8.0966	10.6423	12.0014	9.4242	5.6389	6.9285	6.4813	14.5649	8.9212	5.4462	20.5279	26.0304	7.8865	7.4989	8.3982	14.4727	5.0734	6.1545	27.5368
AC010460.2	0	0	0	0.0824	0.061	0	0	0	0	0	0	0	0	0	0	0	0	0	0	0	0	0	0.0173	0.08	0	0	0	0.0363	0	0	0	0	0	0.0345	0	0.0191	0	0	0	0	0	0	0.858	0	0	0	0	0	0
NPPC	1.3062	2.3225	0.1288	4.5597	2.6075	0.1392	7.1827	9.0016	1.3999	0.5504	5.1327	1.1422	0.0196	0.1376	0.4359	0.0305	3.0718	1.971	0.4258	0.0684	0.3699	0.0869	0.3393	0.1264	0.2714	2.4565	0	1.872	0.8152	0.2039	0.0718	0.0958	0.4107	0.0327	0.1866	0.3986	0.233	2.871	0.2483	0.094	2.9374	3.4915	1.9887	0.4896	1.0479	0.1129	0.1194	0.2936	1.0643
AC138956.2	0.1132	3.1741	0.7255	0.2378	0.964	1.2702	0	0.616	0.5345	0.6766	0.2208	0.3486	0.5958	0.8062	0.119	1.3629	1.0942	0.212	2.1752	3.0287	1.5007	1.4546	1.0211	1.7436	2.1358	0.5049	0.7833	0.9551	0.8957	0.8052	0.534	0.7125	0.4284	0.0221	1.0541	0.784	0.4362	0.0685	0.5037	0.8346	0.4071	0.445	1.3141	0.6922	0.6377	1.2701	0.7047	0.8935	0.1136
AC073263.2	0.0064	0.0284	0.0329	0.015	0.0074	0.02	0	0	0.0189	0	0.0715	0.0232	0.0056	0.0439	0.0096	0	0	0.0687	0.0181	0.0131	0	0.0125	0.0126	0.0291	0.0062	0.0187	0.0082	0.0066	0.0098	0.0247	0.0069	0	0	0	0.0077	0.0208	0.0103	0.0129	0.015	0	0	0.021	0.1386	0.0171	0	0	0.0125	0.0084	0
RF00019	0.1184	1.3973	0.4551	0	0	0.5533	0	0.2576	0.5239	0.3537	0.3299	1.0719	0.1038	0.3242	0.2667	0.6477	0.3178	0.475	1.3378	1.5712	1.3075	0.2304	0.116	0.2681	0.8057	0.2295	0.3033	0.1218	0	0.1138	0.3807	0	0.2488	0	0.1413	0.2562	0	0	0.1386	1.2465	0	0.1938	2.5561	0.1573	0	0.1088	0	0.4671	0
HMOX2	6.8752	2.9627	5.9542	5.3044	5.9009	6.0461	2.8669	5.4402	4.4876	9.1874	4.4489	5.2059	5.9079	6.6643	5.0488	2.6561	4.4765	9.2585	3.9007	5.7801	6.5571	4.2063	4.1685	4.2403	3.6198	7.3549	4.2485	6.5471	4.8387	6.2862	4.5854	6.6228	4.3367	5.4499	3.2545	7.5374	4.1593	5.1247	7.1151	4.1657	3.9719	4.4648	4.5986	5.065	5.9068	5.8518	3.182	5.3522	0.8488
SLC35E2B	7.7836	8.7439	18.7475	2.5927	11.1003	17.8327	2.9229	12.5688	5.7592	5.2085	4.544	10.2029	8.2215	12.7442	5.898	3.8418	8.1246	8.4482	5.768	17.9246	7.8129	8.5195	23.4247	18.2777	6.9408	5.2628	13.0792	15.6051	15.884	8.8218	15.6658	9.3537	6.709	7.781	10.3119	11.6358	5.9555	6.9621	10.6113	9.2202	3.4937	3.8899	8.4071	16.4868	11.4372	14.8985	10.8837	16.7551	2.3844
PQLC1	8.3182	5.7093	5.3575	6.3688	4.6496	5.0165	2.7527	9.2879	5.6141	3.562	4.5813	6.253	5.0153	6.7241	4.7321	3.8125	5.2799	6.8435	7.5057	6.5019	3.8122	5.6682	4.6434	9.0816	9.4585	4.8068	8.2967	5.3177	5.9738	6.6944	6.1153	3.9568	2.684	4.6719	3.5316	7.0117	6.6742	5.1603	6.1456	10.5009	1.896	2.9638	5.7533	5.599	5.2116	5.8849	5.6724	6.0432	1.8447
RGPD8	0.1476	0.2229	0.0823	0.077	0.1798	0.1786	0.1234	0.3118	0.123	0.1038	0.0798	0.1541	0.2376	0.1878	0.0574	0.2233	0.247	0.0116	0.3753	0.2854	0.1502	0.4445	0.2519	0.2084	0.1722	0.0741	0.0845	0.1447	0.243	0.2503	0.1694	0.3427	0.104	0.1171	0.1575	0.2423	0.1254	0.1331	0.0264	0.3913	0.0454	0.0512	0.2437	0.1108	0.0876	0.4374	0.1689	0.2535	0.0494
PLCH1-AS2	0	0.1297	0	0	0.0337	0.274	0	0.0638	0.1297	0.0876	0	0.0265	0	0	0	0.0401	0	0.1176	0.1242	0.4488	0.1618	0	0.0575	0	0.171	0	0	0.1206	0.0892	0.0282	0	0.0838	0.0308	0.0573	0.1049	0	0.0941	0	0	0.0617	0	0	0.0395	0.0779	0.0344	0.0808	0.0285	0.0385	0
SLC3A1	0.0219	0.062	0.5434	0.0427	0.7466	0.0228	0.05	0.0219	0.0458	1.7913	0.0789	0.2168	0.0289	0.0626	0.0961	0.045	0.3656	0.2885	0.0878	0.0616	0.7672	0.0302	3.9511	0.0517	0.0729	0.0301	0.0304	0.1956	0.4449	0.5709	0.0803	2.6222	0.1402	0.0661	0.0284	0.2255	0.0381	0.0332	0.0342	0.0385	0.0836	0.7094	0.7401	0.0146	0.0279	0.0118	0.0178	0.2861	0.2476
SPIN3	3.1103	4.0014	3.234	1.2182	1.9378	4.8963	3.3149	2.7403	2.7784	3.3199	1.5743	2.7137	3.9972	3.625	2.0728	2.7822	2.8962	2.2167	3.9221	6.5101	3.7541	2.9276	3.6871	3.1926	3.6363	2.535	3.5503	3.1663	2.8242	3.9613	2.0766	3.4016	2.3017	4.4754	3.07	2.6781	2.3494	1.4544	3.2884	2.3061	3.3592	2.1234	3.9141	4.1979	3.0369	5.3582	2.6478	3.6517	3.9418
KRTAP5-9	0.0421	0.0155	0.0539	0.0491	0.0242	0.0984	0	0.1145	0.1087	0.0629	0.0293	0.0667	0.0277	0.3747	0.0553	0.0864	0.1271	0.0845	0.4014	0.4298	0	0.1332	0.0825	0.3456	0.174	0.1836	0.0405	0.0433	0.0801	0.0809	0.0451	0.1656	0.0996	0.3497	0.0377	0.2164	0.0169	0.0425	0.1109	0.0665	0.0344	0.0345	0.0284	0.1399	0.0247	0.2129	0.0716	0.0415	0
STIM2	3.5443	4.7671	4.2091	3.6452	5.7961	3.8073	5.4756	4.3236	4.7359	5.6953	2.669	3.0335	2.5498	1.9312	3.0433	1.1007	1.8978	6.1731	4.7082	3.2033	4.8167	4.6656	5.4795	4.7361	6.5827	6.17	3.053	8.2034	4.8784	6.3068	2.9162	4.7051	2.6427	3.0867	3.7532	6.5927	3.4196	1.5551	3.9487	2.5566	4.6269	3.8821	4.2342	1.449	8.1872	4.4696	4.5944	5.1187	1.042
SNORD115-20	0	0	0	0	0	0	0	0	0	0	0	0	0	0.1997	0	0	0	0	0	0	0	0	0	0	0	0	0	0	0	0	0	0	0	0	0	0	0	0	0	0	0	0	0	0	0	0	0	0	0
RPS20P25	0	0	0.0435	0	0.0391	0	0.0619	0	0	0	0.0473	0	0	0	0	0	0	0	0	0	0	0	0	0	0	0	0	0	0	0	0	0	0	0.0332	0	0	0	0	0	0	0	0	0	0	0	0	0	0	0.1136
SPATA21	0.0106	0.0548	0.0306	0.0093	0.0397	0.0124	0.0048	0.0087	0.0196	0.0198	0.0259	0.0168	0.0116	0.0036	0.0279	0.0181	0.0142	0.0213	0.03	0.0786	0.0342	0.0129	0.0052	0.0511	0.0413	0.0257	0.0102	0.0437	0.004	0.0332	0.0114	0.0038	0.0195	0.0207	0.0095	0.0545	0.0085	0.0054	0.0311	0.0196	0.0304	0.013	0.2328	0.0106	0.0218	0.0366	0.0206	0.014	0
C2orf78	0	0	0.005	0.0504	0.0181	0	0	0	0.0058	0	0.0219	0.0036	0.0103	0.0054	0.0147	0	0.0053	0	0.0111	0.008	0	0	0.0154	0.0178	0.0076	0.0076	0	0.0081	0	0	0.0084	0.0056	0	0	0	0.0127	0.0063	0	0.0046	0.0041	0.0064	0	0.0742	0	0.0092	0.0036	0	0	0
AC096733.1	0.0297	0.2633	0.0381	0	0	0	0	0.0324	0	0	0	0.0808	0	0	0	0	0.0399	0.1193	0.084	0.1215	0.0548	0	0.0583	0.0674	0	0	0.0762	0.0918	0	0.0286	0.0319	0.0851	0	0	0	0	0	0	0.0696	0.0626	0.0486	0	0	0	0.0349	0.0273	0	0.0782	0
THAP3	3.274	3.0456	2.1034	2.4534	2.3007	2.2189	1.948	2.7063	1.7327	1.9914	2.655	3.7965	3.7314	3.1641	2.5928	1.9118	3.2633	3.4128	2.1112	3.6453	3.6485	3.2179	2.0033	3.6173	2.0956	3.6432	2.6069	3.0538	3.2073	2.3563	1.7878	3.2126	5.1968	4.933	1.7874	3.6376	2.6111	2.4727	3.4101	3.3052	3.2439	3.6444	2.7144	3.6761	5.068	2.3515	2.6841	2.6144	2.4947
ZBED8	3.2375	5.2532	4.2953	2.9909	5.5732	8.146	11.6448	7.2147	7.1099	10.1063	4.9718	6.2253	7.5572	9.4479	4.423	3.858	3.7035	6.2326	9.3426	10.7631	9.0823	11.5097	7.7697	7.3777	6.3156	6.954	9.0075	7.0939	6.8591	7.4092	3.0848	8.2257	7.8319	13.0956	6.2695	6.7402	6.1612	2.0283	6.7812	6.4134	13.8082	7.9784	7.3038	8.3555	9.7029	7.7124	10.097	8.9995	9.7217
AC126177.4	0	0	0	0	0	0	0	0	0.0408	0	0	0	0	0	0	0	0	0	0	0.0141	0.0254	0.0135	0	0.047	0.0538	0	0	0.0427	0	0.0133	0	0.0395	0	0.0405	0	0.0449	0	0	0	0.0146	0	0	0.0187	0	0	0	0	0	0
TMEM18	5.6987	6.7886	5.8414	6.8601	7.061	9.2113	13.4581	5.2568	12.5963	8.3996	10.2346	7.3445	9.7086	8.5071	8.225	6.2514	6.2584	8.1638	5.6287	9.6829	9.7089	4.4227	3.9851	10.8005	5.5132	5.2413	6.5931	7.8471	4.1362	9.6365	4.8432	8.3603	11.4875	7.4041	4.2129	6.8709	5.5439	4.9414	7.035	5.4438	11.0135	9.2145	13.1478	3.9065	5.5599	5.9806	6.088	6.4221	4.4601
MIR548H3	0	1.196	0.3895	0.1182	0	0.1579	0	0	0	0.1514	0	0	0.3555	0	0	0	0	0	0.4294	0	0	0.1972	0.298	0	0.3941	0	0	0.3127	0	0.2921	0	0	0	0	0	0.1096	0	0.2044	0.2373	0.2134	0	0	0	0	0	0.1863	0	0.7996	0
HIBADH	21.8907	11.3684	14.7018	17.4783	13.0874	19.6558	21.6983	15.0715	17.6618	22.2289	16.8373	16.8514	22.7191	19.8953	25.3608	21.5083	17.1331	20.4594	10.7023	23.5051	27.5524	15.885	14.0063	14.6688	18.0866	23.2899	16.2874	14.7089	17.2889	16.4078	15.1784	26.2136	19.658	23.7832	18.037	19.3294	21.4809	14.3527	18.2399	8.7528	24.5027	27.7359	27.805	13.7016	22.1942	21.0121	20.9574	16.3882	13.7217
ZNF655	7.862	11.0601	7.7366	6.6383	6.2225	9.196	8.1348	6.3016	6.3451	6.6739	4.3682	6.3078	5.4034	8.216	8.1497	9.8078	6.4053	5.8077	13.7251	7.0924	8.1086	9.2434	8.8216	6.5894	8.1536	7.5299	9.2754	6.6162	6.6903	8.4407	6.7556	8.9746	6.5501	10.4975	10.9059	6.6507	5.8621	4.3104	5.875	11.4106	7.1545	4.8076	13.8232	9.0055	5.0783	7.4511	11.806	7.9251	7.1624
SCNN1A	0.4151	0.7866	2.2399	0.0214	1.1636	0.0761	0.0148	0.0177	7.994	0.1641	1.4231	0.4753	0.1124	0.0529	0.2872	0.0473	1.1717	4.8824	2.0494	0.3137	3.3075	0.1485	2.234	0.4539	0.368	5.1934	0.245	0.4061	7.1847	0.3129	0.9881	5.6283	7.6112	0.0398	1.0225	0.6076	1.0485	0.8332	0.0738	0.6535	0.8812	2.0657	4.9703	0.6382	0.0096	0.2301	0.3443	0.5272	0.405
HNRNPA3P12	0.0112	0.083	0.0865	0.0131	0.0776	0.0526	0	0.0612	0.0166	0.0504	0.0313	0.0407	0.0099	0.0154	0.0676	0.0769	0.0453	0.0301	0.0794	0.0689	0.1035	0.0328	0.1103	0.0382	0.0219	0.0763	0.1009	0.1967	0.0171	0.0865	0.0723	0.0322	0.0473	0.0769	0.1074	0.0608	0.0361	0.0113	0.0395	0.0829	0.0368	0.0553	0.0911	0.0299	0.0528	0.1138	0.0656	0.0296	0
CCR9	0	0.0251	0.0273	0.005	0.0147	0.0199	0.0155	0.0046	0	0	0.0059	0.0154	0.0075	0.0117	0.0096	0.0058	0.0114	0.0171	0.018	0.0217	0.0235	0.0124	0.0292	0.0048	0.0207	0	0.0709	0	0.013	0.0041	0.0046	0.0061	0.0716	0.0083	0.0051	0.0092	0.0273	0.0043	0.005	0.009	0.0139	0.0488	0.0287	0	0	0.0117	0.0041	0.0112	0
FADS2P1	0.0165	0	0	0	0	0	0	0	0	0	0	0	0	0	0	0	0	0.0221	0.0117	0.0084	0	0	0.0081	0.0187	0.008	0	0	0.0255	0	0	0	0	0	0	0	0	0	0.0083	0	0	0	0	0.0112	0	0.0097	0	0	0	0
AC067968.2	0	0.0312	0.0271	0.0493	0.1701	0.0329	0.0385	0	0	0.0316	0	0.0956	0.0371	0.1157	0.111	0.0578	0.0567	0	0	0.2157	0.0389	0.0617	0.145	0.0239	0.0205	0.0819	0.2436	0.1087	0.0321	0	0	0.0906	0.0222	0.0413	0.0756	0.0686	0.0339	0.0213	0.1237	0.0667	0	0.0346	0.114	0.1685	0.0744	0.0194	0.0205	0.1111	0.1413
LINC01398	0	0.0156	0	0.0371	0	0	0	0	0	0	0.0148	0	0.0093	0.0145	0.008	0	0.0284	0	0	0.0649	0	0.0206	0.0104	0.024	0	0.0308	0	0.0109	0	0.0102	0	0.0151	0.0445	0	0	0.0115	0	0.0214	0	0	0	0.0173	0	0.0141	0	0	0	0	0.0177
LINC02348	0	0	0	0.1427	0	0	0	0.0266	0	0	0	0.0443	0.1072	0	0	0.0669	0.0656	0	0.0691	0.0999	0	0.0238	0.0479	0	0.0238	0.2133	0.1253	0.0755	0.0372	0	0.0524	0.0699	0.0514	0	0.0876	0	0.0392	0.074	0	0.0257	0	0.1201	0.066	0	0	0.0225	0.0476	0	0
IL18R1	0.6867	0.2796	0.3977	0.3173	0.2054	0.2097	0.0501	0.1494	0.7659	0.2913	0.8151	0.3979	0.2264	0.0978	0.2991	0.1691	0.2802	0.2021	1.1562	0.157	0.2629	0.6737	0.4416	0.3825	0.8707	0.205	0.0704	0.4775	0.773	0.2825	0.3887	0.3575	1.9139	0.153	0.2852	0.9213	0.1279	0.4017	0.2187	0.6305	0.2379	0.3868	0.278	0.1752	0.1225	0.5304	0.4407	0.1951	0.3354
AC006272.1	0.1083	0.032	0.1665	0.0253	0.0997	0.0675	0	0	0	0	0.1207	0	0	0.0593	0	0	0.0581	0.0869	0	0.0221	0.319	0.0632	0.0425	0.0736	0.1053	0.042	0.0833	0.0223	0.033	0.0208	0.0464	0.031	0.0911	0.0423	0	0.0234	0	0.0218	0.1014	0.0228	0.177	0	0.0292	0	0	0.0597	0.1053	0.0855	0
STX2	6.3365	10.1734	5.988	4.6696	5.9268	5.3141	4.9929	3.554	10.2053	9.4705	4.9173	5.2777	3.5883	4.0148	7.3381	3.8043	2.5347	5.2318	7.1314	5.1347	6.5621	12.0058	6.0729	7.0109	12.041	6.3818	8.4099	7.9058	5.1397	14.3891	8.5618	5.227	7.0915	9.4255	5.4163	11.8801	5.1138	5.0753	5.5307	7.3653	5.3691	5.1534	5.6689	5.5871	8.8441	5.076	9.1758	6.5763	2.8629
MTND4LP24	0	0	0	0	0	0.064	0	0	0	0	0	0	0	0	0	0	0	0	0	0.0419	0	0	0	0	0	0	0	0	0	0	0	0	0	0	0	0	0	0	0	0	0	0	0	0	0	0	0	0	0
MIR6133	0	0	0	0	0.1274	0	0	0	0	0	0	0	0	0	0	0	0	1.1846	0	0	0	0	0	0.1254	0	0.1073	0	0.3417	0	0	0	0	0	0	0	0	0	0	0	0	0.3619	0	0.4482	0	0	0	0	0.1456	0
OR7E26P	0.0357	0.0701	0.0914	0	0	0.0556	0.0433	0.0259	0.0701	0.142	0.0497	0.0861	0.0313	0.1627	2.008	0.0975	0.0479	0	0.235	0.3034	0	0.0347	0.0117	0.0135	0.0231	0.1498	0	0.11	0.0542	0.0114	0.0382	0.017	0.0125	0.3252	0.0284	0.1929	0.1908	0.024	0.0835	0.1126	0.1165	0.0778	0.0321	0.0474	0.1673	0.0219	0.0809	0.1407	0.1193
MIR4325	0	0	0	0	0	0	0	0	0	0	0	0	0	0	0	0	0	0	0	0	0	0.1293	0	0	0	0	0	0	0.2021	0	0	0	0	0	0	0	0	0	0	0	0	0	0	0	0	0	0	0	0
ABCE1	7.2141	11.3535	12.6561	12.8992	17.933	16.4705	17.5311	11.1788	11.7293	8.4304	10.1437	11.0521	13.4419	14.6599	9.736	9.1315	12.1497	11.637	14.8002	9.9411	13.7855	12.0624	15.642	9.8127	14.4351	13.3142	13.6799	17.1981	13.1405	16.3826	10.8939	13.2299	4.5932	12.2617	13.7403	10.2108	15.1548	8.3764	16.0064	11.4767	18.2425	11.8061	13.9516	5.9529	16.3916	13.5958	13.901	13.9378	8.0915
AL445209.1	0	0.0051	0	0.02	0.3271	0.0053	0.025	0	0	0	0.0239	0	0	0	0.0026	0.0047	0	0	0	0	0	0	0.0034	0.0039	0	0.0033	0.0044	0	0.0104	0	0	0	0	0	0.0041	0	0	0.0069	0	0	0.1063	0.0056	0	0	0	0	0	0	0.0286
PARD6A	1.3178	0.2845	0.6487	0.9658	2.0062	2.5415	0.3515	0.8918	0.7705	0.9483	0.918	0.8803	1.0782	0.5941	0.8749	0.4287	0.4206	1.8377	0.2951	1.0419	2.3962	0.7664	1.4336	0.555	0.7188	1.698	0.7	1.0167	0.8679	0.5251	0.3532	1.448	0.7769	0.6125	0.5563	1.591	1.1866	0.3566	1.1947	0.5584	1.9172	1.1578	1.323	1.1213	0.8957	0.5984	0.3673	0.8771	1.6261
AES	78.5967	50.0301	52.6343	46.2533	32.6181	44.9453	15.0381	53.7044	52.0147	51.3628	49.4898	56.5623	46.7678	67.9365	72.3657	61.6808	54.8247	65.1196	49.5718	64.5217	61.4927	33.7732	36.505	54.1348	49.6383	70.6714	35.6265	55.458	46.0502	40.7193	34.2874	43.0767	75.9191	38.6248	27.8418	43.6976	32.1467	41.7195	55.5843	56.6645	21.1369	37.4003	46.8751	58.5144	58.3596	50.0226	33.8574	46.8391	8.1453
AC068714.1	0	0	0	0	0.0172	0	0	0	0	0	0	0	0	0	0	0	0	0	0	0	0	0	0	0	0	0	0	0	0	0	0	0	0	0	0	0.0162	0	0	0	0.0315	0	0	0	0	0	0	0	0	0
YLPM1	5.3241	13.3483	14.1394	3.0942	10.937	17.526	2.4918	15.0002	9.6519	6.1452	6.1891	7.6485	6.7797	11.7537	9.818	8.0598	8.8517	6.3371	9.1986	10.3189	8.3979	12.9966	18.0869	10.2556	16.2654	9.594	14.0031	16.7365	12.8057	8.5618	16.6321	11.7447	5.5659	6.0611	15.3782	12.132	12.5868	2.7106	8.9486	10.7425	2.7282	2.3952	8.0244	4.2482	10.7143	15.6078	12.7178	12.7756	0.4382
PMCHL2	0	0	0.0054	0	0.0145	0.0065	0.1145	0	0	0	0.0058	0	0.0073	0.0057	0	0	0	0	0.0118	0	0	0	0.0082	0.0142	0.0041	0	0	0.0172	0	0	0	0	0	0.0082	0.005	0.0136	0.0067	0	0	0.0088	0	0	0.1074	0	0	0	0.0041	0	0
CDC42SE2	5.2896	14.294	12.557	4.8084	4.7248	15.7842	6.1028	10.8572	10.3919	15.104	8.8876	10.4052	14.488	13.2163	7.115	10.6317	9.4628	8.917	13.6821	15.7878	15.3418	10.8527	14.5731	10.0795	13.8952	8.7253	14.5832	8.6654	13.4639	12.4313	16.0276	15.3942	5.528	9.6854	12.7502	14.1154	8.9654	8.109	11.616	8.9743	10.5971	11.0434	8.1562	18.6393	11.0925	14.897	13.7024	15.5369	11.0377
SLC39A7	13.6673	13.6975	11.4927	12.3539	13.0845	8.3816	4.3431	14.2406	11.6684	13.5484	4.163	8.1583	6.4944	8.9828	10.0856	8.9448	9.9055	9.5331	14.034	6.08	10.5987	10.3117	11.8731	9.5457	10.9882	15.7454	8.5178	10.8947	9.3344	8.7323	10.3617	12.3038	5.3224	5.3519	17.8526	17.3834	7.4813	7.2562	9.8304	11.1695	4.6704	2.615	6.4032	7.1326	8.9698	8.5823	10.5975	10.5901	0.977
ATG2B	1.7177	3.512	3.946	1.555	3.7719	3.5587	2.9419	3.0224	2.6653	1.8287	1.4259	1.8314	1.5561	2.3564	1.8001	1.6678	1.9287	2.3818	3.1635	2.8597	3.3049	3.5333	4.1084	2.8115	4.4456	2.2266	2.7893	3.097	2.9651	1.6733	3.4432	3.9702	2.4728	3.2625	3.1742	3.4306	2.6364	1.6238	2.3756	2.192	1.8181	1.5977	2.044	1.1452	1.9737	3.3855	3.4391	3.3252	0.3505
RNU1-34P	0	0	0	0	0	0	0.1388	0	0	0	0	0	0	0	0	0	0	0	0	0	0	0	0	0	0	0	0	0.0783	0	0	0	0	0	0	0	0	0	0	0	0	0	0	0	0	0	0	0	0	0
ALDH3A1	0.2075	0.1171	0.1994	0.0249	0.0632	0.0285	0.0056	0.1528	0.3692	0.196	0.1531	0.1188	0.1151	0.2758	0.2016	0.1878	0.2335	0.1755	0.6768	0.1215	0.5281	0.0594	0.0808	0.2211	1.1928	0.1479	0.086	0.2229	0.3807	0.1085	0.0818	0.2837	0.8724	0.1282	0.0911	0.2575	0.578	0.1016	0.0679	0.2089	0.0798	0.1249	0.1647	0.0811	0.0501	0.188	0.1276	0.0843	0.0868
RN7SL815P	0	0.5475	0.1585	0.0962	0.1897	0.1927	0	0.0897	0	0.1232	0	0.224	0.3254	0.2258	0.031	0	0.3874	0	0.1165	1.347	0	0.1605	0.0404	0.0467	0.2004	0.0799	0.1585	0.1272	0.1254	0.1585	0	0	0	0	0.0984	0	0.1985	0	0.0483	0.2605	0.1348	0	0	0.274	0.0968	0.0379	0.1203	0	0
AC000095.1	0	0	0	0	0	0	0	0	0	0	0	0	0	0	0	0	0	0	0	0	0	0	0	0	0	0	0	0	0	0	0	0	0	0	0	0	0	0	0	0	0	0	0	0	0	0	0	0	0
POU4F3	0.0303	0.0448	0.0259	0	0.0233	0.9929	0	0.0881	0	0.0453	0.0282	0.055	0	0.0693	0.0228	0.0692	0.0272	0	0.0714	0.0516	0.0186	0	0.0694	0.0573	0	0.049	0.311	0.0312	0.2001	0.0194	0.0867	0.1157	0	0.0593	0.0724	0.1204	0	0.051	0.0237	0.0533	0.0165	0	0.0273	0.0269	0.0119	0.0372	0.0492	0.0931	0
ENTPD3	0.3269	2.485	1.9807	0.17	1.4431	0.2602	0.0712	1.8713	0.3827	0.7803	0.6336	0.1126	0.1028	0.4768	2.9108	0.8068	0.4006	0.4562	0.3564	0.2539	0.1177	0.2352	0.9335	0.1368	2.4633	10.605	0.0956	0.3472	0.2216	0.379	0.179	0.1321	0.1195	0.5973	0.1145	0.4805	0.2567	0.2365	0.8444	1.1449	0.993	1.4371	1.0262	2.262	0.025	0.6795	0.1866	0.2664	0.0535
ZNF407	1.3104	1.8625	2.1405	0.7406	1.7165	2.4742	0.3111	2.4025	1.5222	0.8733	0.8322	1.1714	1.0727	1.6143	0.9508	1.7294	1.6022	0.8593	2.5286	1.4761	1.1104	2.1747	2.5932	2.8964	3.667	1.1894	3.4481	1.8535	1.8309	2.0503	2.0934	1.7423	0.6536	1.2155	2.0195	1.6555	1.9822	0.6232	1.1081	2.3218	0.3382	0.363	1.4084	1.4	1.1532	2.2221	2.5229	2.2497	0.2411
CD24P4	0.0492	0.7986	0.6305	0	0.736	0.7666	9.3267	0.4819	0.2904	0	0.0686	0.401	0.3452	0.6737	0.2217	0.6057	1.1888	0.1974	1.0426	0.3014	0.634	1.5324	0.3859	0.78	0.909	0.9539	0.5043	1.8222	0.4491	0.5202	0.422	0.7037	0.1034	0.0481	1.292	0.6921	1.0268	0.0992	0.6336	0.3627	0.5629	0.564	0.2656	0.1962	0.7505	0.6786	1.1005	1.0354	0.5761
AC009269.5	0.4677	1.2901	0.2345	0.4983	0.1638	0.095	5.3739	0.2213	0.09	0.243	0.3683	0.8837	0.6242	0.1114	0.1374	0.3616	0.0819	1.2238	0.0862	1.3494	0.524	0.1187	0.4983	0.2763	0.2373	0.3548	0.1563	0.1883	0.1547	0.2736	0.1526	0.2617	1.2395	0.0795	0.0243	0.154	0.0979	0.3896	0.5713	0.1499	1.0302	0.333	0.6312	0.3243	0.5965	0.2431	0.0593	0.5349	0.034
LINC02451	0	0	0	0.0344	0.017	0	0	0	0	0.022	0	0	0	0	0	0	0	0	0	0	0	0	0	0.0167	0	0.0143	0	0	0	0	0	0	0	0	0	0	0	0.0149	0	0	0	0	0.0796	0	0	0	0	0	0
IGHV3-63	0	0	0	0	0	0	0	0	0	0	0	0	0	0	0	0	0	0	0	0	0	0	0	0	0	0	0	0	0	0	0	0	0	0	0	0	0	0	0	0	0.1719	0	0	0	0.0411	0	0	0	0
AC239800.3	0	0	0	0	0	0	0	0	0	0	0	0	0	0	0	0	0.0542	0	0	0	0	0	0	0	0	0	0	0	0	0	0	0	0	0	0	0	0	0	0	0	0	0	0	0	0	0	0	0	0
FBL	117.4084	79.9999	70.8018	75.9466	54.3645	70.4021	61.9008	67.0438	79.1491	132.0214	111.1551	78.1418	85.8014	88.8204	161.4012	191.9025	103.8518	69.5072	66.0641	64.0678	73.4431	48.1853	55.0476	61.5546	59.9504	89.2891	69.5561	71.2901	58.236	71.3049	62.0465	48.4012	70.3927	84.652	54.7232	45.0995	114.0461	63.3479	94.3536	73.03	50.7304	66.674	85.877	82.2713	80.4588	70.8027	61.6009	59.678	31.7555
TAS2R10	0.0803	0.3386	0.397	0.1071	0.1584	0.2861	0.2301	0.2622	0.3555	0.2057	0.0959	0.1143	0.1107	0.2985	0.2326	0.2354	0.077	0.1535	0.4214	0.3749	0.3802	0.6701	0.3037	0.2469	0.4351	0.3448	0.3675	0.3423	0.3491	0.3639	0.2583	0.5087	0.1809	0.6729	0.4246	0.4469	0.1842	0.0116	0.1343	0.7129	0.2438	0.1127	0.4336	0.0915	0.1616	0.4642	0.5691	0.3169	0.1151
RF00402	0	0	0	0	0	0	0	0	0	0.4321	0	0	0	0	0	0	0	0	0	0.1969	0	0	0	0	0	0	0	0	0	0	0	0	0	0	0	0	0	0	0	0	0	0	0	0	0	0	0	0	0
TESK2	2.4151	4.3014	2.795	0.4242	1.0021	1.5926	1.3185	3.2037	1.9381	1.0377	0.5666	1.7858	2.8504	1.1286	2.2648	2.0825	1.7247	0.9965	2.659	2.2562	2.0804	2.7674	2.2863	2.6286	0.7244	1.0432	1.6231	3.1953	1.451	1.8368	1.7208	2.7385	1.218	1.1573	2.569	5.7945	4.0961	0.8276	1.3737	2.6491	1.3646	1.2081	0.5829	1.4829	2.3861	2.5846	3.5211	2.0875	2.6968
AC104777.3	0	0	0	0	0	0	0	0	0	0	0	0	0	0	0	0	0	0	0	0	0	0	0.0215	0	0.0213	0	0	0.0226	0	0.0422	0	0	0	0	0	0	0	0	0	0	0	0	0.0296	0	0	0	0	0	0
GAS8	1.2585	4.1849	3.0589	0.9542	1.8865	2.7405	1.0052	1.9464	4.1341	1.6096	1.8334	1.9319	2.1887	1.4637	1.7748	4.0137	1.3576	2.4037	2.2469	5.7003	4.3902	3.0735	2.8013	2.927	3.0167	0.8545	2.4607	1.9868	1.4739	3.6468	1.2417	4.4951	1.6583	1.7648	1.2378	3.1586	4.0812	0.6851	2.3309	1.7534	1.1519	0.5893	2.0116	1.9046	1.4042	1.4293	2.7459	2.4112	0.26
AL161457.2	0.1522	0.2421	0.2141	0.0592	0.1614	0.3068	0.0544	0.237	0.1893	0.1204	0.1289	0.1162	0.1753	0.1961	0.1098	0.1837	0.1202	0.0998	0.451	0.4661	0.2142	0.1655	0.234	0.2703	0.2321	0.1649	0.237	0.1872	0.2406	0.1807	0.2271	0.2048	0.1443	0.1021	0.3811	0.2228	0.2922	0.1806	0.1327	0.3519	0.0585	0.171	0.157	0.1031	0.1365	0.2579	0.4701	0.2943	0.1847
AC087163.2	0.4065	0.91	0.467	0.1963	0.4677	0.5242	0	0.5949	0.5583	0.6701	0.1562	0.368	0.2336	0.4798	0.4421	0.3451	0.1881	0.1125	0.9306	0.9016	0.5935	1.0778	0.3847	0.7618	1.0358	0.5027	0.5926	0.721	0.3199	0.7544	0.571	0.7618	0.7513	0.1781	0.9871	0.8948	0.3825	0.1131	0.2462	1.2103	0.1374	0.2525	0.2648	0.1677	0.2303	0.4769	0.9269	0.5162	0
BX322639.1	0.2383	1.0323	1.5357	0.2086	0.5112	0.7214	0.3506	0.5001	1.1426	1.3325	0.8775	0.6766	0.6882	2.4334	1.7051	2.517	0.7083	0.1116	0.8368	1.4616	1.7924	1.2889	3.7161	0.5243	1.5144	0.9653	1.1907	1.8369	1.533	1.3889	0.7025	2.7583	0.4383	0.8784	4.0188	0.7367	0.459	0.4103	1.0223	3.3124	0.4089	0.8891	0.9993	0.5882	0.4993	1.3664	1.3955	1.0947	1.7794
MIR3688-1	0	0	0	0	0	0	0	0.1399	0	0	0	0	0	0	0	0	0	0	0	0	0	0	0	0	0	0	0	0	0	0	0	0	0	0	0	0	0	0	0	0	0	0	0	0	0	0	0	0	0
TMEM215	0.4174	0.0887	0.0428	0.6741	0.2843	0.1092	0.4077	1.6059	0.0148	0.0948	0.0651	0.0212	0.0029	0.0274	0.005	0	0.0851	0.0268	0.1179	0.0239	0.0738	0.0292	0	0.0265	0.1331	0.6344	0.0086	0.0275	0.4521	0.061	0.0072	0.1624	1.0984	0.0196	0.0558	0.0289	0.0054	0.2829	0	0.0211	0.1146	0.3936	0.027	0.0044	0.0118	0.0338	0.0325	0.0132	0.1229
AC112220.2	0.4071	1.9974	0.5338	0.011	0.5555	1.5488	0.2243	0.3708	1.6201	0.1697	0.1846	1.0886	0.4483	0.7	0.3341	0.259	0.2795	0.7724	0.6151	1.5754	1.5161	1.6585	0.5104	1.0719	1.3991	0.4405	1.225	0.594	1.3682	0.8734	1.2482	2.5048	1.4327	1.4341	0.8136	0.6453	1.7779	0.105	0.4322	1.5949	0.6653	0.8836	0.4727	0.9939	0.8775	1.767	0.9482	1.1703	0.5858
OR1J2	0	0	0.0163	0	0	0	0	0.0138	0.0187	0	0	0	0.0223	0	0	0	0	0	0	0.0518	0.0234	0	0.0124	0	0	0	0.0325	0.0131	0	0	0	0.0182	0.0133	0	0	0	0	0.0384	0	0	0	0	0.0343	0	0	0.0117	0	0	0
AL591504.1	0	0	0	0	0	0	0	0	0	0	0	0	0	0	0	0	0	0	0	0	0	0	0	0	0	0	0	0	0	0	0	0	0	0	0	0	0	0	0	0	0	0	0	0	0	0	0	0	0
RF00012	0.0586	0	0	0	0.0674	0	0	0.1913	0	0	0.1633	0	0	0	0.044	0	0	0	0	0	0	0.2852	0	0	0	0.2841	0	0	0.1783	0	0	0.0838	0	0	0.4197	0	0	0	0	0	0	0.096	0	0	0	0	0.114	0	0
AL034345.1	0	0	0	0	0	0	0	0	0	0.1452	0	0	0	0	0	0	0	0	0	0	0	0	0	0	0	0	0	0.1	0	0	0	0	0	0	0	0	0	0	0	0	0	0	0	0.3876	0	0	0	0	0
MRPL47	17.5249	24.9166	22.3787	25.2675	27.7643	20.3699	51.3308	20.3039	37.9689	33.5197	36.7084	33.1647	29.9428	29.875	33.356	27.8628	20.781	37.201	28.7738	23.8351	35.9867	23.7751	20.2418	25.683	17.7864	35.6077	30.4237	28.5139	26.7795	27.7208	25.0819	23.2913	26.9853	53.7868	33.2818	21.1326	32.543	37.5218	42.5758	29.9035	64.7813	64.2638	31.9416	42.5218	35.3597	29.867	25.156	30.6807	64.9399
AC113404.2	0	0	0	0	0	0	0	0	0	0	0	0	0	0	0	0	0	0	0	0	0	0	0	0	0.0668	0	0	0	0	0	0	0	0	0	0	0	0	0	0	0	0	0	0	0	0	0	0	0	0
GLYATL1P1	0.0298	0.0329	0.0095	0.0434	0.0342	0.0464	0.0407	0.0162	0.0878	0.0111	0.0207	0.0135	0.0196	0.0611	0.0335	0	0.03	0.0299	0.0631	0.038	0.0411	0.0507	0	0.0084	0.123	0.0577	0	0.0459	0.1019	0.0429	0.0638	0.149	0.0156	0	0	0.1369	0.0119	0.0675	0	0.047	0.073	0.0122	0.0602	0.0198	0.0175	0.0137	0.0072	0.0294	0.0622
GRIA1	0.0344	0	0.004	0.0749	3.9076	0.0024	0.0742	0.0443	0	0.014	0.0393	0.0482	0.0014	0.0129	0.0047	0	0.0778	0.0063	0.0044	0.0048	0.0115	0.0122	0.0368	0.0301	0.0015	0.0288	0.012	0.509	0	0.0181	0.0034	0.0112	0.0049	0.0046	0	0.0203	0.005	0.0205	0.0092	0	2.738	0.0513	0.1416	0.0042	0.237	0.0029	0	0.0041	0.0026
ZMAT1	4.742	3.6743	2.4551	0.2433	2.2903	4.8594	3.1815	1.5826	4.0541	3.8675	0.6739	2.1813	2.0166	4.9132	2.03	1.5454	2.123	1.4578	2.4096	9.2358	11.1835	2.9147	2.7063	1.9152	3.8572	2.8304	2.6563	2.2524	2.3239	2.4851	2.7889	5.6735	10.25	4.6172	2.9382	4.645	1.4687	0.6483	1.44	1.451	2.369	1.5034	3.5261	1.9921	1.4657	4.1683	2.2237	2.4506	0.3327
RN7SL513P	0	0.0592	0	0.0468	0.0923	0	0	0	0	0.0599	0.0559	0.0363	0	0.1099	0	0	0	0.0537	0	0	0.1477	0	0.0787	0.1817	0	0	0.0514	0.0413	0.061	0.0386	0	0.0574	0	0.0784	0	0.0434	0	0	0	0.0422	0	0	0.9205	0	0.0471	0	0	0	0
HMGB1P11	0.2065	0.0277	0.0241	0	0.0648	0	0.0342	0.0204	0	0.028	0	0.017	0	0	0.0282	0	0	0.1506	0.0265	0.0383	0.2419	0.5298	0.0184	0.0425	0	0.091	0.0481	0.1545	0.0571	0.018	0.0604	0.3758	0.0395	0.0183	0.3585	0	0	0.0379	0	0	0.0307	0	0.0507	0	0	0.069	0.0365	0.0247	0
LRRC4	1.262	0.542	1.3856	0.9956	7.727	1.2093	0.1296	1.1895	1.3199	0.77	0.5572	0.4211	0.1169	0.146	0.5361	0.0689	0.3221	1.4462	0.0753	0.1875	3.8719	0.7179	1.6902	0.2616	0.4551	2.2715	0.3909	0.707	0.6445	1.8478	0.5621	6.2241	1.5599	0.2779	1.9943	1.2629	0.233	0.239	1.0127	0.1872	1.5783	0.3007	1.0155	0.063	0.2364	0.8607	0.3025	1.1844	0.2131
AL034550.1	0.097	0.501	0.5128	0	0.1395	0.5479	0.0221	0.132	0.2862	0.2174	0.0507	0.0659	0.2552	0.2657	0.2185	0.763	0.3093	0.0324	0.7366	1.4485	0.3795	1.251	0.4517	0.3021	0.6721	0.3761	0.2952	0.3618	0.3505	0.303	0.351	0.4336	0.102	0	0.3184	0.2624	0.0584	0.0611	0.1136	0.664	0.1189	0.0397	0.2455	0.4029	0.185	0.7024	0.283	0.5263	0
RPL7AP65	0.0959	0.1179	0.2048	0.0373	0.1471	0.1245	0.1165	0.0348	0.2594	0.1194	0.0445	0.1881	0.1542	0.2408	0.192	0.0437	0.2575	0.3634	0.429	0.3427	0.206	0.0933	0.2977	0.1086	0.1088	0.2634	0.0819	0.1973	0.0486	0.1383	0.0514	0	0.0504	0.0781	0.0763	0.0865	0.0513	0.0806	0.1497	0.3366	0.2612	0.0523	0.1726	0.085	0.0563	0.2352	0.1088	0.1892	0.3475
AC108865.1	0.1446	1.9562	0.4634	0	0.0555	0	0	0.5508	0.0356	0	0	0.2401	0.0211	0.231	0.2715	0.2968	0.2912	0.2579	1.328	0.9106	0	0.0938	0.2127	0.1365	0.1641	0.5374	0.6485	2.0582	0.11	0.139	0.1809	0	0	0.212	0.0575	0.4695	0.0387	0	0.1693	0.0508	1.3	0.0395	0.7808	0.0641	2.8002	0.0222	0.2813	0.0634	0.121
RF00017	0.0687	0	0.1321	0.1203	0.1581	0	0.1879	0.0374	0.1014	0	0.0479	0.0311	0	0.2823	0.129	0.047	0.1845	0.2298	0	0.1754	0.3162	0.0334	0	0.2723	0	0.1332	0.1321	0.0707	0.1045	0.033	0	0.0983	0.2889	0.1343	0.082	0.0743	0.0552	0	0.1207	0.0724	0	0.0563	2.6893	0.0913	0	0.0632	0.0668	0.0904	0
GEMIN2P2	0	0	0.0214	0	0.0192	0	0	0	0	0	0	0	0	0	0	0	0	0.0447	0	0.0171	0.0308	0	0	0.0568	0	0	0	0.0344	0	0	0	0	0	0	0	0	0	0	0	0	0.0273	0	0.2031	0	0	0	0	0	0
AC021006.3	0	0	0	0	0	0	0	0	0	0.093	0.2603	0	0	0	0	0	0	0	0.088	0	0	0	0	0.0705	0	0	0	0	0	0	0	0	0	0.0609	0	0	0	0	0	0	0	0	0.3362	0	0	0	0	0	0
PRC1-AS1	0.2193	0.9904	0.2555	0.1939	0.1376	0.2796	0.2302	0.1157	0.2353	0.0298	0.1204	0.1083	0.1982	0.4004	0.1298	0.3364	0.223	0.2845	0.2253	0.6243	0.2202	0.1682	0.1564	0.1505	0.0775	0.2964	0.1277	0.2325	0.1112	0.2108	0.1852	0.0951	0.3912	0.3832	0.2142	0.2373	0.1174	0.0536	0.1556	0.3709	0.1303	0.2068	0.2511	0.0707	0.1716	0.2078	0.0905	0.3671	0
WHAMMP3	0.5938	0.8664	0.5248	0.1324	0.3369	0.0282	0.066	0.2488	0.5047	0.2457	0.3437	0.557	0.3448	0.4279	0.515	0.441	0.6027	0.0176	0.876	0.44	0.7539	0.682	0.2838	0.5643	0.3934	0.4863	0.2044	0.2081	0.6206	0.6402	0.238	0.7034	0.5549	0.9292	0.1747	0.6318	0.2482	0.3235	0.0924	0.2598	0.3414	0.3043	0.3951	0.4809	0.0598	0.7048	0.4127	0.2704	0.1761
MTCO1P15	0.0548	0.0231	0.01	0.0457	0.009	0	0.0428	0.0171	0	0.0351	0.0218	0.0355	0	0	0.0412	0	0.0105	0.0105	0.0221	0.016	0.0144	0	0.0384	0.0089	0.0305	0.0076	0.0301	0.0242	0.0119	0	0.0084	0.0112	0.0906	0.0077	0.0281	0.017	0	0	0.0367	0.0248	0.0512	0.1026	0.0952	0.0104	0.046	0.036	0	0	0.0262
SYNGAP1	3.0109	9.4891	5.6712	2.2113	5.5519	5.3565	2.0457	5.1467	2.6737	4.9783	1.6682	4.008	5.4603	6.0419	3.6568	13.305	8.0024	2.6536	9.028	8.5008	4.0943	9.8836	8.7352	6.5144	7.1229	5.141	4.4921	4.3905	5.9408	5.6003	3.8763	3.5929	2.8115	2.2683	7.6738	6.0744	4.3202	1.8454	4.105	8.8956	2.3138	1.1778	4.5398	5.3359	5.4503	3.6345	7.2656	4.8615	0.2471
TXNDC8	0	0.0083	0	0	0.0258	0	0	0	0	0.0502	0	0.0051	0	0	0.0042	0	0	0.03	0	0	0.0103	0.0055	0	0.0127	0	0	0	0.023	0.0085	0	0	0	0.0059	0	0	0	0	0	0.0131	0.0118	0	0	0.0378	0.0223	0.0066	0	0	0	0
MIR6130	0	0	0	0	0	0	0	0	0	0	0	0	0	0	0	0	0	0	0	0	0	0	0	0	0	0	0	0	0	0	0	0	0	0	0	0	0	0	0	0	0	0	0	0	0	0	0	0	0
LINC01664	0.0265	0.0521	0.0339	0.1649	0.1422	0.4128	0	0.0961	0.0912	0.066	0.1599	0.1199	0.0542	0.0242	0.1658	0.0604	0.0119	0.1653	0.0748	0.1713	0.0325	0.0602	0.0606	0.03	0.0343	0.0342	0.0905	0.0818	0.0269	0.0679	0.0852	0.0253	0.0371	0.1899	0.0422	0.0669	0.0567	0.1247	0.031	0.0465	0.1155	0	0.1907	0.0939	0.0311	0.1299	0.0945	0.1277	0
RNU6ATAC42P	0	0	0	0.5875	0.1448	0	0	0	0	0	0	0	0	0	0	0	0	0	0	0	0	0.1225	0.3701	0.285	0	0	0.1612	0	0	0	0	0	0	0	0	0.1362	0	0.1269	0	0	0.2057	0	6.4543	0	0	0	0	0	0
AC007536.1	0.0685	0.4549	0.0439	0	0.0788	0	0	0	0.1011	0	0.3818	0.031	0.0601	0.1407	0.0772	0	0	0	0.0484	0	0.0631	0.0333	0.1679	0.0388	0	0.0664	0.0439	0	0	0	0	0.049	0	0	0	0.1112	0	0.0346	0.1203	0	0.056	0	0.5086	0.0911	0.0804	0.0315	0	0.0901	0
AC012379.1	0	0	0	0	0.0339	0	0	0	0	0	0	0.0533	0	0	0	0	0	0	0.1248	0.0301	0	0	0	0	0	0	0	0.0909	0	0.0283	0	0	0	0	0	0	0.0473	0	0.1034	0	0	0	0	0	0	0	0	0.0387	0
CYS1	0.1596	0.2045	4.5422	0.544	3.3872	0.1505	0.0536	0.457	4.8078	5.27	1.1878	1.3271	0.0626	0.1668	0.4951	0.0517	1.8771	14.2054	0.2254	0	5.342	0.6336	12.6058	0.0761	0.7432	0.2972	0.1022	1.5164	3.5459	2.3369	0.2881	13.7968	0.64	0.0739	0.797	1.2178	0.2359	1.3935	0.1868	0.0265	0.954	5.3913	6.6481	0.1674	0.1035	0.2162	0.6453	1.8945	1.9737
PLEKHJ1	8.9695	3.7746	5.6679	7.6222	6.865	5.919	5.0841	7.32	5.6915	5.9513	7.794	6.6257	7.6905	7.4876	10.5652	5.7409	6.7745	6.273	2.9171	7.4082	4.6573	5.5673	6.3627	4.3654	2.7397	5.3332	7.7002	5.8975	5.7675	5.5443	7.6323	5.0952	4.1383	7.1192	3.823	5.0328	6.5555	5.344	7.4996	5.5174	6.5777	5.5895	7.0297	9.6948	5.1054	6.9244	4.6785	7.4891	4.2529
RNASE8	0	0	0	0	0	0	0	0	0.0278	0	0	0	0	0	0.0142	0	0	0	0	0.0385	0	0.0184	0	0	0.0183	0.0183	0	0	0.0287	0	0	0.0539	0.0198	0	0	0	0	0	0	0	0	0	0	0	0	0	0.0367	0	0
TXNDC16	4.2463	11.7223	7.7239	2.7764	5.736	10.606	12.6642	6.7702	8.1551	3.6824	3.0687	6.3757	9.0323	5.4341	8.2391	11.8338	3.4169	3.4825	8.5677	6.0559	6.66	9.0758	10.0711	7.2704	11.9004	5.0185	9.2574	8.988	5.6192	12.9603	7.873	8.5808	3.7998	5.4913	7.3388	8.7598	11.7973	3.7888	6.3003	6.0758	6.5353	8.7788	6.2547	3.7086	13.6206	10.4298	11.5146	9.1814	3.9286
AC004906.1	0	0	0.0158	0	0.0142	0.0385	0	0	0	0	0	0	0	0.0169	0	0	0	0	0	0	0	0	0.0121	0.014	0	0.012	0	0.0127	0	0	0	0	0	0	0	0.0134	0	0	0	0.013	0	0	0.3164	0	0.029	0	0.012	0	0
OR7E36P	0.2757	0.0185	0.0321	0.0146	0.0577	0	0.0457	0.0546	0.0185	0.0562	0.0175	0	0.022	0	0.0471	0.0171	0.0168	0.0671	0.0354	0.0128	0	0.0244	0.0246	0.0142	0	0.085	0	0.0516	0.0191	0.012	0.0134	0.0358	0.0132	0.0245	0	0.0136	0.0402	0.1138	0.0147	0.0396	0.041	0.0205	0.0169	0	0.0735	0.0115	0.0244	0.0494	0.0838
ZNF780B	2.121	2.2547	2.9157	1.1792	3	4.6225	3.0595	1.811	3.4122	3.2595	1.8868	3.358	3.4153	4.8313	2.705	4.0137	2.4638	3.3364	4.3007	6.9134	7.3453	2.8559	3.029	2.3516	3.2366	2.4571	3.2624	2.5542	1.8629	2.9971	2.3946	6.0872	1.8351	5.1676	2.4882	2.3144	1.5097	0.7967	2.521	5.2125	3.2245	1.9967	2.8273	3.655	1.8935	2.5059	2.6517	3.3132	1.5491
RNU6-143P	0	0.3794	0	1.5003	0.1479	0.2003	0.2343	0.1399	0.1897	0.3841	0	0.1164	0	0.176	0.0965	0.3517	0	0	0.3632	0.3938	0	0.1251	0.126	0	0.125	0.4985	0	0.3968	0	0.1236	0	0	0	0.1256	0.1535	0.4173	0.2064	0	0.4515	0.1354	0	0	0.347	0.1709	0.3017	0.2364	0.125	0.3382	0
AC010547.2	0.1754	0.3451	0.8616	0	0.4036	0.6832	0	0.4772	0.2156	0.3494	0.4073	1.3764	0.5384	0.3202	0.7024	0.2799	0.157	0.7038	0.3304	0.6566	0.4305	0.2561	0.6305	0.2648	0.5969	0.8218	0.1873	1.1127	0.2668	0.7305	0.188	0.9616	0.4609	0.1714	0.3838	0.3163	0.0469	0.0884	1.0267	0.5849	0.3344	0.2393	0.8679	0.3108	0.8232	0.4032	0.6823	0.8458	0
LINC01984	0.0397	0	0	0	0	0	0	0	0	0	0	0	0.0348	0	0	0	0	0	0	0	0	0	0	0	0	0	0	0.0409	0	0	0	0	0.0417	0.0388	0	0	0	0	0	0	0.0649	0	0	0	0	0	0	0	0
POU3F3	11.4145	0.2667	4.503	0.1575	20.4893	0.0225	0.0088	0.2308	47.1819	4.9541	18.4746	0.8467	0.0127	0.2145	8.4785	0	3.1961	18.7606	0.3302	0	56.3708	0.0047	7.0239	0.0682	0.3867	17.8488	0	7.6114	9.4302	2.4923	47.6302	26.8276	7.8802	0.0094	28.0819	22.7254	0.0077	3.6484	7.6126	0.0152	13.8288	11.3142	23.9482	0.1025	4.3521	1.0371	0.0234	1.7655	4.0148
RNA5SP513	0	0	0	0	0	0	0	0	0	0.1514	0	0	0	0	0	0	0	0	0	0	0.1865	0	0.0993	0	0	0	0	0	0	0	0	0	0	0	0	0.1096	0	0	0	0	0	0	0	0	0	0	0	0.1333	0
MOB3A	25.5302	15.9915	17.0537	12.6546	19.0882	22.0822	1.8541	21.1981	22.0009	18.7268	20.8897	19.3945	13.7666	21.8918	22.0975	22.8037	20.7752	19.5338	19.971	19.8627	30.4497	18.5592	17.8085	25.7091	24.1311	18.7246	27.3207	20.6893	22.6348	22.3421	30.5827	28.484	16.8428	18.1829	15.3236	25.985	18.8408	14.5404	22.439	24.3728	4.832	7.5452	12.4216	22.2369	19.2872	23.6589	17.7845	20.3601	1.4315
AC034102.5	0.0664	0.4574	0.1986	0.155	0.0255	0.0345	0	0.0482	0.294	0.1654	0.0308	0.3609	0.0971	0.1819	0.1663	0.1514	0.1486	0.3554	0.5004	0.2713	0.0408	0.1724	0.0651	0.1254	0.1292	0.2146	0.2269	0.0683	0.2021	0.1064	0.0949	0.3167	0.2327	0.1948	0.3171	0.1437	0.0355	0.1117	0.1296	0.2331	0.1086	0.1813	0.4183	0.0883	0.1299	0.0204	0.1077	0.0582	0.037
C10orf25	4.3507	5.1067	4.6692	2.1169	3.1643	4.848	2.4992	4.4763	13.3123	4.5031	3.534	4.4175	3.2228	6.1327	5.224	1.95	2.9511	3.1848	3.6764	5.2707	15.2238	4.2117	4.9922	10.7232	2.965	5.5616	9.3362	6.9091	3.132	4.353	10.3935	20.4226	14.9423	9.939	9.3379	6.0689	3.9283	2.8873	4.8024	4.1803	4.6279	2.0735	3.8059	3.5932	4.7448	8.3112	6.0668	5.3234	3.2289
SNORD116-7	0	0.1857	0.3226	0	0	0	1.3763	0.2739	0.1857	0	0	0	0.2208	0	0.189	0.1722	0	0.1683	0	0.771	0.4634	0	0.3701	0.1425	0.2448	0.244	0	0	0	0	0	0	0.1323	0.492	0	0.1362	0.202	0.6347	0	0.3976	0.4114	0	0.1698	0.3345	0	0.3472	0	0.1655	0
RNA5SP470	0	0.9986	0.1445	0	0.1298	0.703	0	0.1227	0	0.5055	0	0	0	0	0	0.3086	0.1514	0	0	0.2303	0	0	0	0.1277	0.1097	0.2187	0.1445	0	0	0.2168	0.4837	1.2906	0	0.2205	0	0.6102	0	0	0	0	0.1843	0	0	0	0	0	0.3291	0	0
TBC1D19	1.922	4.2896	3.1322	2.7304	2.8002	3.8951	1.5992	3.2166	3.1539	3.2509	1.7269	2.6859	3.6521	2.9368	1.7674	3.1338	3.0798	2.51	6.5364	4.3795	3.7495	3.6531	3.5326	3.6585	4.3706	2.825	3.2965	4.1942	3.623	3.6039	3.9041	4.3921	1.8736	4.5258	3.1501	3.462	4.6276	2.3773	2.8656	2.966	3.3856	3.3979	2.8522	2.1795	6.3977	3.9633	3.3927	2.9581	2.9932
RNU6-717P	0	0	0	0	0	0	0	0	0	0	0	0	0	0	0	0	0	0	0	0	0	0	0	0	0	0	0	0	0	0	0	0	0	0	0	0	0	0	0	0	0	0	0	0	0	0	0	0	0
AC073288.2	0	0.0531	0.1615	0	0.145	0.0561	0	0.0588	0.0797	0.1076	0.0251	0.0163	0.079	0.0493	0.027	0	0	0.0241	0.0254	0	0.1326	0.0876	0.0706	0.0816	0.0175	0.1222	0.0231	0.0741	0.1096	0.0865	0.0772	0.0515	0.0568	0	0	0.0584	0	0.0726	0.0843	0.0569	0	0.0295	0	0.0479	0.0634	0.0993	0.1226	0.071	0
SORBS3	30.0105	5.6104	17.5131	27.4911	20.7489	11.5284	3.6672	18.326	22.7019	18.1105	36.029	15.6837	23.3078	18.6593	35.8381	22.5995	7.4991	22.0006	2.5374	11.9308	19.2915	12.5837	16.9726	4.25	4.6354	30.1946	10.954	18.9832	7.5866	21.4967	9.1655	19.3132	21.0784	3.4058	13.9925	20.1695	15.6196	10.2922	21.93	9.0713	6.1789	5.157	15.6143	9.4244	25.5549	9.3905	9.44	18.549	1.4366
AC011506.1	0.3332	0.1735	0.2763	0.366	0.1579	0.1832	1.5362	0.128	0.347	0.2342	0.3823	0.284	0.275	0.1074	0.4268	0.1877	0.1315	0.6554	0.0831	0.3602	0.2165	0.0954	0.1153	0.1775	0.0191	0.076	0.0753	0.3831	0	0.0754	0.021	0.0561	0.7004	0.5747	0.0234	0.0424	0.2517	0.1779	0.5507	0.0826	0.2242	0.7061	0.6613	0.0782	0.23	0.1802	0.0572	0.1804	1.049
AL132640.1	0.2704	0.2565	0.1733	0.0225	0.1556	0.4213	1.0562	0.1681	0.4274	0.0577	0.0269	0.0525	0.2541	0.7934	0.0435	0	0.1815	0.0258	0.382	0.6705	0.6045	0.0564	0.2462	0.2187	0.1315	0.0562	0.4207	0.0994	0.0882	0.1299	0.3313	0.3315	0.203	0.5475	0.0461	0.5016	0.062	0	0.294	0.0814	0.0631	0.1898	0.391	0.0257	0.1586	0.4973	0.1503	0.4065	0
OR7A15P	0	0	0	0	0.0303	0	0	0	0	0.0197	0	0	0	0	0	0	0	0.0176	0	0	0	0	0	0.0299	0	0	0	0.0407	0	0	0	0	0	0	0	0.0285	0	0	0	0	0	0	0.1779	0	0	0	0	0	0
ZNF806	0.0135	0.0099	0.0086	0	0	0.0315	0	0.0073	0.0099	0	0.0094	0.0122	0.0059	0.0923	0.0051	0.0092	0	0.009	0	0.0069	0.0124	0.0328	0.0396	0	0.0066	0	0	0.0416	0	0.013	0	0.0096	0	0.0198	0	0.0146	0	0.0068	0	0.0284	0.0551	0	0.0273	0	0.0158	0.0124	0.0066	0	0.0225
IGIP	2.7489	0.5714	2.0337	3.7363	1.2889	2.0041	4.4933	2.1333	1.9179	3.4091	1.6041	1.966	1.683	2.0216	1.376	1.6364	1.1417	3.8569	0.7033	3.1383	5.9893	2.1403	1.3117	2.674	3.0728	1.639	1.453	1.6504	1.2361	0.9869	1.7457	7.0518	7.6349	2.5209	1.7292	2.9479	0.3164	1.761	0.8177	0.9757	3.7916	2.61	2.0158	1.9071	1.7973	2.378	1.3786	1.105	1.9835
DNAJB5	1.0859	2.3208	2.5385	1.5371	6.0902	4.6202	0.6955	1.6719	1.533	1.4068	4.8241	2.3724	4.0246	3.1681	1.1567	0.4997	3.0348	3.0485	2.2821	2.155	3.837	2.9611	3.2052	1.1422	1.263	2.0992	1.8254	2.2299	3.6064	1.7204	3.6747	2.1423	0.7359	2.3684	3.5417	8.2085	4.6262	2.0121	3.0937	4.2914	3.7183	1.4523	1.112	1.605	3.5674	1.8008	2.408	3.5635	0.5397
SEC22B	5.4106	7.1217	5.0236	2.8233	5.5733	5.5678	4.0115	4.9398	7.2536	6.9319	2.93	4.3176	4.0452	5.4638	3.8917	4.1186	3.8673	4.6626	5.7077	5.6171	6.8534	7.0306	5.9693	4.1241	4.7705	4.6943	5.8787	5.721	5.6759	5.6908	6.4567	7.8687	3.9852	6.1467	4.717	4.4792	5.1901	5.231	5.1829	7.5061	4.1269	5.0624	4.6814	5.3702	4.7877	7.1724	4.963	5.335	3.7298
SPAG11A	0.0303	0	0.0078	0.0283	0.007	0	0.0331	0	0.8404	0.0453	0.1604	0	0	0	0.0046	0	0	0.0081	0.0257	0.0186	0.0892	0	0.0119	0.0069	0	0.0529	0	0.0062	0.0277	0	0.013	0.0347	0.0318	0	0.0506	0.0197	0	0.0183	0	0	3.08	0	0.0981	0	0.0498	0.0223	0	0	0.0101
BAIAP2	2.028	1.1232	2.1565	2.0614	1.967	2.4898	1.1078	1.6149	2.8015	2.7344	2.3348	2.7191	3.3319	2.387	2.0857	3.0681	2.421	2.1249	2.5823	2.271	4.0156	2.7746	2.233	2.1542	1.2396	1.5242	2.4001	1.7909	2.0155	3.0336	2.3857	6.1866	3.7718	0.8167	2.1917	7.9784	1.4775	2.3383	1.9293	3.0888	1.1187	0.706	2.1738	2.876	2.0714	2.135	2.474	2.6152	0.2566
CBX1P4	0.0785	0	0.0335	0	0	0	0	0	0	0	0	0	0	0.0358	0	0	0	0	0.037	0.0267	0	0	0	0.0296	0.0254	0	0	0	0.0796	0	0	0.0374	0	0	0	0	0.042	0	0	0.0275	0.1283	0	0.0353	0	0	0.0241	0	0	0
MIR548D2	0	0	0	0	0	0	0	0	0.2027	0	0	0.2489	0	0	0	0	0	0	0	0	0.253	0.2675	0	0	0	0.2664	0.1761	0.1414	0	0	0	0	0	0	0	0.1487	0	0	0	0.1447	0	0.225	0	0	0.1613	0.1264	0.1336	0	0
RTL3	0.0316	0	0.0058	0.2793	0.0312	0	0.0741	0.0197	0.0133	0.0135	0.0377	0.1472	0.0079	0.0124	0.0034	0	0.0242	0.0302	0.0191	0	0.0083	0.0088	0.0089	0	0	0.0044	0.0058	0.0464	0.0275	0.013	0.0048	0	0.0095	0.0265	0	0.0098	0.0217	0.0319	0.0053	0	0	0.0148	0.0061	0	0	0.0042	0.0044	0.0059	0.0378
EIF1	145.1475	143.915	121.7453	257.5058	125.8941	95.3731	148.148	121.0192	166.2729	185.6356	167.2512	163.4109	184.411	137.0499	143.5205	156.8126	198.0568	164.1448	193.1406	124.0995	154.9004	84.7191	86.7262	117.9947	86.7736	138.8664	125.39	113.8788	121.085	121.0465	104.4141	112.9148	272.7386	161.5439	85.7013	147.21	114.7941	280.8071	149.494	133.6457	154.4263	176.9676	153.4247	116.4447	184.9272	112.8053	97.5447	121.1069	179.6329
Z97633.1	0.1588	0.3515	0.2591	0.0674	0.108	0.27	0.1974	0.1257	0.3515	0.3667	0.1006	0.1896	0.1963	0.1878	0.2169	0.3852	0.1744	0.1255	0.2142	0.3759	0.5715	0.1757	0.3114	0.1308	0.1966	0.07	0.3053	0.26	0.1757	0.1874	0.2786	0.1755	0.129	0.2046	0.405	0.2031	0.4868	0.1238	0.1521	0.1216	0.236	0.1419	0.1364	0.2495	0.2287	0.2257	0.2106	0.1234	0.0966
GJA10	0	0.0107	0	0	0.0167	0	0	0	0	0	0.0403	0	0	0	0	0	0.0097	0	0	0	0	0	0	0.0738	0	0	0	0.0223	0.011	0	0	0	0	0	0	0.0157	0	0	0	0.0076	0	0	0.0098	0	0.017	0	0	0	0.0121
WDYHV1	7.1168	8.1669	7.0931	18.0494	5.9556	4.6835	10.1601	7.2192	6.8918	9.8942	11.4621	6.4132	9.1778	6.2583	9.9254	10.2486	7.1661	6.4282	5.1492	7.1342	6.4212	3.5206	6.2287	7.3469	3.8552	11.0138	5.3024	9.8767	5.5541	6.0419	4.8935	5.791	5.8057	5.7934	7.7781	7.342	7.2287	20.7911	8.0034	5.3738	13.2252	10.2113	9.7102	3.1975	12.3512	6.6724	5.1756	7.4199	20.2317
AC073901.1	0	0	0	0	0	0	0	0	0	0	0	0	0	0	0	0	0	0	0	0	0	0	0	0.0664	0	0.0284	0	0	0	0	0	0	0	0	0	0	0	0	0	0.0309	0	0	1.5028	0	0	0	0	0	0
SIN3B	11.4541	9.0246	8.3583	5.7562	8.9856	9.2308	2.0062	8.8836	7.4559	7.9	6.117	5.5997	7.4336	10.2012	8.6209	13.0473	10.6088	7.0529	8.2764	14.1668	35.9874	7.9909	9.5187	7.8234	7.8533	7.239	8.3039	9.9693	7.9828	9.8047	10.6382	21.6457	15.8234	6.782	5.6518	10.5428	6.5906	4.4183	7.4415	11.9244	3.4618	2.699	6.2267	8.3065	9.3826	9.0708	5.9654	9.8592	0.8749
AC026785.2	0	0	0	0	0	0.0215	0	0	0	0	0	0	0	0	0	0.0189	0	0	0	0	0	0	0	0	0	0	0	0.0142	0	0	0	0	0	0	0	0	0	0	0.0161	0.0145	0	0	0.0186	0	0	0	0	0	0
EIF4HP2	0.9557	0.658	0.6804	0.4461	0.4398	0.7941	0.8129	1.1555	0.8459	1.5228	0.5326	0.9999	1.5832	0.5525	0.893	0.3195	0.7411	1.5338	0.69	1.7996	1.5247	0.7028	1.374	0.6733	1.0944	0.6793	0.9795	1.4856	0.7108	1.0409	0.2277	1.0934	0.8258	1.3284	0.6337	1.8152	0.5113	0.514	1.1686	0.492	0.4165	0.7303	1.519	0.3669	1.0964	1.5817	0.3924	0.9496	0.1776
AL390838.2	0	0	0	0	0.1506	0.068	0	0.0475	0	0.0652	0	0	0	0	0	0	0	0.1167	0.0616	0	0	0.0425	0.0428	0.1482	0.0424	0.0846	0	0.0449	0	0.0419	0	0	0.0459	0	0	0	0	0	0	0	0	0	0.1178	0	0.0512	0.0401	0	0	0
USP14	11.9308	26.5281	17.7811	12.6079	15.9418	20.8604	13.9591	22.5331	22.4384	9.6841	12.8795	14.8219	15.4025	15.182	12.8243	19.5044	11.714	12.6742	24.7404	15.4633	13.0434	17.9463	20.7124	29.627	39.8538	13.9054	32.4527	15.0033	17.1382	23.0932	19.8216	14.3754	8.8994	19.3579	17.5987	16.3741	22.2346	14.6485	17.1962	29.104	16.7103	13.2633	23.3963	16.5939	9.9777	23.3825	31.6235	19.6042	14.3959
FTLP10	0	0	0	0	0	0	0.029	0.0087	0	0.0119	0	0	0.007	0.0109	0	0	0	0	0	0	0	0	0	0	0	0	0	0.0082	0	0	0	0	0	0	0	0.0086	0.0128	0	0	0	0	0	0.0322	0	0	0	0	0	0
MIR1237	0	0	0	0	0	0	0	0	0	0	0	0	0	0	0	0	0	0	0	0	0	0	0	0	0	0	0	0	0	0	0	0	0	0	0	0	0	0	0	0	0	0	0.1582	0	0	0	0	0	0
RPL23AP1	0	0	0	0	0	0	0	0	0	0	0	0	0	0	0	0	0	0	0	0	0	0	0	0	0	0	0	0	0	0	0	0	0	0	0	0	0	0	0	0	0	0	0	0	0	0	0	0	0
RNU6-808P	0	0.8167	0.4256	0	0	0	0	0.2409	0.3266	0.1654	0	0.1002	0	0.3032	0.2494	0	0.4458	0.7404	0.3128	0.113	0.2038	0.1077	0.4341	0.2507	0.5382	0.1073	0.1418	0.3417	0.3368	0.2128	0.2374	0.3167	0.2327	0.2164	0.2643	0.1198	0.1777	0	0	0.3497	0	0	0.747	0.1471	0	0.1018	0.1077	0.4368	0
CPSF1P1	0.1859	0.6007	0.2999	0.9127	0.5458	0.859	0.0117	0.4325	0.4114	0.4022	0.1384	0.2235	0.5763	0.2063	0.1733	0.2938	0.3356	0.1458	0.0226	0.6153	0.1239	0.3837	0.6882	0.1887	0.0031	0.3418	0.2423	0.7947	0.0878	0.0462	0.1512	0.0688	0.1213	0.0783	0.2984	0.0416	0.1132	0.3524	0.2852	0.0135	0.1362	0.0892	0.5883	0.294	0.6244	0.5895	0.0062	0.1728	0.0054
C1orf159	2.0331	2.4807	3.1991	0.6158	1.3818	2.048	1.5201	1.7122	1.8136	1.941	1.6363	1.9795	2.1861	3.193	2.9354	2.5507	1.6881	2.7015	0.9457	4.3773	2.0993	2.623	2.1617	2.5419	2.4642	3.1771	1.9142	2.3171	2.2183	1.9885	1.7597	1.696	2.1348	2.3973	2.0836	2.3839	2.7656	1.4153	3.1906	3.1883	1.2796	1.1861	2.6901	2.4633	2.1792	2.0954	2.4774	2.5396	0.8161
AC135050.6	5.9784	9.684	8.431	8.0652	9.0255	6.0126	16.6035	7.4518	17.0557	8.7654	6.6764	7.4606	4.4108	14.0327	8.0279	5.0622	12.2699	16.6685	7.149	9.2845	15.9541	4.2022	5.4883	4.0292	4.3519	14.6869	9.3205	6.2638	4.6195	5.5479	4.4758	9.5002	10.8209	11.7627	5.531	4.5688	6.5498	3.0943	10.6094	3.0143	10.8038	7.6395	4.6529	12.4224	5.2702	5.5258	4.5679	10.0672	6.6128
ZNF625	0.0705	0.4322	0.3545	0.095	0.3745	0.4395	0.1285	0.2597	0.3842	0.3242	0.1738	0.4617	0.2522	0.4308	0.3096	0.4378	0.4951	0.0943	0.7433	0.2382	0.2097	0.3854	0.4627	0.2641	0.3956	0.3628	0.4865	0.24	0.2063	0.3493	0.4013	0.4035	0.0399	0.1962	0.3561	0.3639	0.3222	0.0821	0.1905	0.4113	0.4344	0.0711	0.2855	0.2307	0.3246	0.3192	0.4326	0.5779	0.0454
GHRHR	0.0195	0	0	0.0137	0.0584	0.0851	0	0	0	0.0175	0	0.0283	0.0103	0	0.0147	0.0107	0.0052	0	0	0.004	0	0.0038	0.0191	0.0133	0.0038	0	0.01	0.0161	0.0119	0.0375	0	0.0056	0.0041	0	0.0047	0.0084	0	0.0039	0	0.0164	0.0128	0.0128	0.1369	0.0156	0.0275	0.0108	0	0	0
AC016991.1	0	0	0	0	0	0	0	0	0	0	0	0	0	0	0	0	0	0	0	0	0	0	0	0	0	0	0	0	0	0	0	0	0	0	0	0.0336	0	0	0	0	0	0	0	0	0	0	0	0	0
PDGFRL	8.3186	0.8714	0.8841	6.5043	1.9873	0.4253	1.2936	4.9957	1.0983	1.1789	6.6037	3.5277	0.6965	0.6456	2.6982	1.4257	2.5182	3.4386	0.7011	5.5386	5.354	3.8017	1.0217	0.3316	0.9073	6.2497	0.7758	2.4712	4.5379	0.7871	0.1437	2.2786	0.7616	0.2425	1.7121	7.373	0.6772	5.1807	0.4242	0.5278	2.92	5.1687	1.9223	0.3298	1.025	0.6708	0.6661	0.6984	3.5861
ELOCP5	0	0	0	0	0.0413	0	0	0	0	0	0	0	0	0	0	0	0	0	0	0	0	0	0	0	0	0	0	0	0	0	0	0	0	0	0	0	0	0	0	0	0	0	0	0	0	0	0	0	0
TAAR3P	0	0.0164	0	0.0259	0.051	0	0	0	0	0	0	0	0	0	0	0.0152	0	0	0.0157	0	0	0	0	0.0126	0.0216	0	0	0.0456	0	0	0	0	0	0	0	0	0	0	0	0	0.1994	0	0.0299	0	0.013	0.0102	0	0	0
FKBP4P1	0.0089	0	0.0341	0	0.0204	0.0138	0.0162	0.0097	0	0	0	0.0161	0	0.0122	0.0133	0	0	0	0	0	0	0.0086	0.0174	0.0201	0.0086	0.0172	0	0.0365	0	0	0	0.0127	0	0.0174	0	0.0288	0.0142	0	0.0104	0	0	0	0.012	0	0	0.0326	0.0086	0	0
AC116666.1	0	0	0	0	0.0499	0	0.3955	0	0	0	0	0	0	0	0	0	0	0	0	0	0	0	0	0.0491	0	0	0	0	0	0	0	0	0	0	0	0.0235	0	0	0	0	0	0	0	0.0288	0	0	0	0	0
PHKA2	4.4032	4.4704	4.2441	1.4943	2.3067	3.7655	2.1722	4.2898	3.2684	4.1682	3.2951	3.5334	4.3331	4.1831	2.9085	3.1137	3.9424	3.165	3.3577	4.9983	3.4712	3.4051	5.4313	2.5625	2.2713	3.1475	4.1107	5.0281	3.5013	4.042	3.5644	4.2329	5.7869	3.9991	3.5152	3.9516	3.5307	2.3906	3.2386	3.677	1.9001	1.7694	3.6439	4.7008	3.8285	8.4049	3.0778	4.0388	0.8106
RN7SKP219	0	0.0596	0.4659	0	0.093	0.1888	0	0.1758	0	0.1207	0	0.3292	0.1417	0.1106	0.1213	0	0.1627	0.1621	0.1141	0.165	0.2974	0.0393	0.1584	0	0.0393	0.0392	0.0518	0.0831	0.1844	0.1553	0.0433	0.2889	0	0	0.1446	0.0874	0	0	0.0473	0.0425	0.132	0	0	0.0537	0	0.0743	0.0786	0.2125	0
CCNL2P1	0	0.1092	0.0158	0	0.0426	0	0	0.0134	0.0182	0	0	0.0223	0.0216	0	0.0278	0	0.0331	0.0165	0.0349	0.0378	0.0227	0.036	0.0363	0	0.036	0	0	0.0508	0	0.0474	0.0529	0.0529	0.013	0	0	0.0267	0	0	0	0.013	0.0403	0	0.0167	0	0	0.034	0	0	0
AL136097.2	0.0359	0.2649	0.092	0.1676	0.1652	0.0559	0	0	0.053	0.2146	0	0.1951	0.063	0.3441	0.0809	0.0491	0.0964	0.4322	0.1014	0.0733	0.0661	0.4543	0	0.3252	0.0349	0.1392	0.138	0.1847	0	0.138	0.3464	0.1027	0	5.1935	0.7714	0.1165	0.1729	0.1448	0.042	0.2268	0	0	0.4846	0.334	0	0.1651	0.5238	0.0472	0
CICP17	0	0	0	0	0.0116	0	0	0	0	0	0	0	0	0	0	0	0	0	0	0	0	0	0	0	0	0	0	0	0.0077	0	0	0	0	0	0	0	0	0	0	0	0	0	0.0068	0	0	0	0.0049	0.0066	0
PAPPA	0.2945	0.3094	0.421	0.0217	1.3717	0.1014	0.5461	0.1855	0.5319	0.5957	0.3728	0.4359	0.0172	0.1528	0.1458	0.1215	1.0511	0.6688	0.1401	0.0728	1.2457	0.3057	0.795	0.0795	0.1025	0.3185	1.1383	1.3827	0.2939	1.1458	1.0421	2.2134	1.1846	0.9299	0.2528	0.5589	0.0547	1.3879	0.0544	0.049	1.4706	0.2318	0.1478	0.232	0.2679	0.0655	0.0965	0.1957	0.1503
AC023827.1	0	0	0	0.4315	0	0	0	0	0	0	0	0	0	0	0	0	0	0	0	0	0	0	0	0	0	0	0	0	0	0	0	0	0	0	0	0	0	0	0	0	0	0	0	0	0	0	0	0	0
KRT6A	0.0204	0.0362	0	0	0.0094	0.0064	0	0	0	0.0061	0	0.1331	0	0	0.0031	0	0.1864	0	0	0.0125	0.0075	0.004	0.004	0	0.0953	0.0277	0	0.2899	0	0.0118	0	0	0	0.008	0	0.0133	0	0.0165	0	0	0	0.0134	0	0	0	0.0075	0	0	0
AC092634.2	0	0	0	0	0.0272	0	0	0	0	0.1415	0.0495	0	0	0	0	0.3562	0	0	0	0	0.9806	0	0	0	0	0	0	0	0	0	0	0.6095	0.0124	0	0	0	0	0	0	0	0	0	0	0	0	0	0	0	0
POLD3	3.7425	9.4131	8.4982	2.0113	6.7534	7.4883	5.5944	6.5194	7.4489	4.7702	4.6	5.9553	5.3021	6.7947	6.5623	2.6189	4.691	4.6831	10.0055	5.4608	5.3466	10.0038	16.8469	7.3959	5.0192	8.2023	8.104	8.6219	10.376	8.6119	3.5393	5.3989	1.9392	5.3081	8.2548	6.5739	11.3698	4.1377	7.3039	4.1349	5.144	4.3115	7.315	7.4231	5.3208	9.259	9.3053	9.0872	3.2457
AC024257.3	0.0131	0	0.1051	0.0153	0.0679	0.1738	0.0957	0.0714	0.1645	0.1176	0.032	0.1366	0.1755	0.2066	0.0665	0	0.1145	0.0395	0.0649	0.72	0.2355	0.0862	0.1351	0.4234	0.0415	0.2798	0.1303	0.027	0.1198	0.0977	0.007	0.1923	0.0793	0.2084	0.0392	0.3017	0	0.0033	0.0614	0.0069	0.1394	0	0.1372	0.17	0	0.003	0.1404	0.1294	0
APOBEC1	0.0134	0	0.0517	0	0	0	0	0.0146	0	0	0.0375	0	0	0	0.0404	0	0.0181	0.018	0	0.0137	0	0	0	0.0152	0	0.0521	0	0.0553	0	0	0	0	0	0.0526	0	0.0291	0	0.1085	0.0787	0	0	0	0.2178	0	0.0316	0.0124	0	0.0177	0.1125
AC009313.2	0	0	0	0	0.0142	0	0	0	0	0	0	0	0.0054	0	0	0	0	0	0	0.0063	0.0113	0	0	0	0	0	0	0	0	0	0	0	0.0129	0	0	0	0	0	0	0	0	0	0.0249	0	0	0	0	0	0
FAM219A	6.6138	2.8967	5.7973	3.2723	9.4499	7.7827	1.1755	4.4377	2.8823	6.4702	2.0173	4.8432	3.7042	4.1253	2.7513	6.9666	2.9619	4.8161	3.3404	3.3794	4.8303	6.7908	4.8098	4.6249	4.4695	3.797	3.3131	2.8001	3.458	7.3375	4.5547	5.8146	2.5618	2.3667	5.3243	6.6119	4.2424	4.6136	4.0713	7.1239	2.5626	0.9784	2.7903	4.8739	1.5876	5.1189	3.8922	3.742	0.6451
LINC02430	0.0502	0	0.0966	0.0293	0.0289	0	0	0.0547	0	0.0375	0	0.0682	0	0	0.0754	0.0344	0	0	0.071	0.0256	0.3237	0.1711	0	0.0284	0	0.073	0	0	0	0.0483	0	0	0	0	0.06	0	0.0403	0	0	0	0	0	0.1017	0.0668	0	0.0924	0.1221	0	0
PSMC1P11	0.0182	0	0.0116	0.053	0.0313	0	0.0331	0	0.0268	0	0	0.0247	0.008	0.0124	0.0068	0	0.0122	0.0243	0.0385	0.0185	0.0167	0	0.0267	0.0411	0	0.0088	0.0233	0.0187	0.0138	0	0.0097	0	0	0.0532	0	0.0196	0	0.0092	0	0.0191	0	0	0.2695	0.0121	0	0	0	0	0
RAE1	8.9405	12.9831	11.2342	6.6582	9.9644	11.8744	11.4637	8.5996	13.9154	15.7261	13.0248	13.5067	12.5439	12.552	19.8159	14.3967	8.8671	9.1689	20.3683	11.3565	9.3302	15.9559	9.3826	10.745	12.1379	11.4119	14.562	12.8585	11.2647	12.4546	10.6279	7.9762	8.5764	14.23	10.0812	12.2912	12.0629	12.3591	13.8089	21.546	14.9712	13.8533	11.2026	11.2442	12.6466	18.3444	12.0465	12.0481	14.5223
NAALADL2	0.6401	0.3074	1.2382	0.4155	1.4071	0.8	1.0977	1.0553	0.4747	0.8406	0.256	0.5644	0.3393	0.8511	0.5631	1.1521	0.727	1.0184	1.0582	1.1005	0.8368	0.4741	1.1954	0.1523	0.3907	0.8455	0.7265	0.6349	0.9818	0.9117	1.0151	0.8098	0.535	0.5645	0.7587	0.6355	0.199	0.4318	0.3675	0.5027	1.5101	0.8422	0.9362	3.8047	0.5715	0.4179	1.0012	1.0326	0.5323
RF02104	0	0	0	0	0	0	0	0	0	0	0	0	0	0	0	0	0	0	0	0	0	0	0	0	0	0	0	0	0	0	0	0	0	0	0	0	0	0	0	0	0	0	0	0	0	0	0	0	0
AC109492.1	0	3.4793	0	0.0645	0.106	2.3825	0	0.02	0.0272	0.4954	0	0.05	0.0323	0.2775	0.0138	0.0756	1.459	0	0.9369	0.0188	2.5096	2.5282	0.0903	2.3363	3.4214	0.0357	2.2894	2.6154	0.1121	1.9653	4.4632	0.6587	0	2.7188	2.9026	0	0.0296	0.1301	0	0.6596	0.6323	0.0302	0.4227	0.9549	0.0432	0.0678	0.86	0	0.1849
LINC01145	0.4659	1.0458	0.7438	0.0461	0.3725	0.0708	0.2627	0.5478	0.5039	0.5279	0.2366	0.4612	0.7896	0.1703	0.2342	0.8102	0.9116	0.0977	0.594	0.0302	0.7778	2.4135	1.0587	0.3622	0.3167	0.7828	0.0632	0.6479	1.0933	0.1157	0.3894	0.6692	0.0726	0.6387	0.6363	1.1877	0.2028	0.1931	0.4993	0.6403	0.2968	0.4494	0.7833	0.6901	0.5212	0.9839	0.4262	0.8491	0.2179
TRGV4	0.0521	0.0256	0.4454	0.0203	0.12	0.0812	0	0.0567	0	0.1038	0.0968	0.1101	0.0305	0.1666	0.0391	0.0951	0	0.0697	0	0.0887	0.032	0.0677	0	0	0.1183	0	0.0223	0	0.1586	0.1169	0	0.0249	0	0.1189	0.0207	0.0376	0	0	0.1424	0	0	0	0.0235	0.0231	0	0.1438	0.1859	0.1371	0
MIR3198-1	0	0.6615	0.1915	0	0	0.6986	0	0.6505	0.2205	0.6698	0.2082	0.406	0	0.8186	0.5611	0	0.4012	0.5997	0	0	0.8254	0.4364	0.586	0.3385	0.436	0.5795	0.1915	0.7687	0.6821	0	0	0	0	0.1461	0	0	0	0.1507	0.3499	0.7869	0.977	0.7342	0.4034	0.1986	0.3507	0.8245	0.5814	0.1966	0
HLA-K	0.0115	0.3913	0.2216	0.4978	0.2653	0.1437	0.1051	0.4642	0.2722	0.2067	0.0643	0.167	0.1315	0.0316	0.1558	0.5362	0.2786	0.1388	0.2769	0.3885	0.2971	0.3703	0.1243	0.3917	0.0561	0.1676	0.3988	0.1067	0.0877	0.3546	0.2348	0.4452	0.2787	0.1127	0.4129	0.2121	0.2591	0.0233	0.324	0.0971	0.1696	0.1322	0.0778	0.5517	0.0676	0.2014	0.1794	0.1516	0.0771
AC092490.1	0.0682	0.031	0.0202	0.0245	0.0785	0.0082	0.2008	0.0514	0.0155	0	0.0146	0	0.0046	0	0.0591	0.3086	0.0423	0.007	0.0222	0	0.0386	0.0255	0.0051	0.0059	0	0.0254	0.0067	0.0432	0.0319	0.0101	0.0056	0.015	0	0.0103	0	0.0057	0.0084	0.0317	0.0123	0	0	0.0172	0.0142	0.007	0.0308	0.0482	0.0102	0.0138	0.0263
THAP5P1	0.502	1.6833	1.462	1.0118	0.5251	1.1377	0.4159	0.7449	1.5485	1.7043	0.3179	0.7024	0.3202	0.9373	2.8784	1.5606	0.245	0.6104	0.7736	1.1182	1.2601	0.8883	1.8342	0.7751	0.8875	1.9907	0.8185	1.1267	0.4166	1.0526	0.8316	1.2401	0.1439	0.223	3.3227	0.4444	0.8058	0.3222	1.122	1.826	0.0746	0.0747	1.047	0.5459	0.4819	0.8392	2.3077	1.8006	0.0763
OR2J2	0	0	0.0241	0	0.0108	0	0	0	0.0139	0	0	0	0	0	0	0	0	0	0	0	0	0	0	0	0	0.0091	0	0	0	0	0	0	0	0.0092	0	0.0102	0	0	0	0	0	0	0	0	0.0331	0.0173	0	0	0
NUTM2E	0	0.0438	0	0	0.0228	0.0617	0	0	0.0973	0.1035	0	0	0	0.0542	0.0025	0	0.0177	0.0176	0.014	0	0.0911	0	0.0097	0	0.0834	0.0448	0	0.0034	0.005	0	0.0141	0.0047	0.0312	0.058	0.0787	0.0143	0.0053	0.0133	0.0656	0	0.0054	0.0162	0.0356	0.0307	0.0039	0.094	0.077	0.0521	0
MTCO3P40	0.3007	0	0	0	0.0204	0	0	0	0	0	0	0	0	0	0.0266	0	0	0	0	0	0	0	0	0.02	0	0	0	0.0364	0	0	0.0569	0	0	0	0	0.0191	0	0	0	0	0	0.2027	0	0	0	0	0	0	0
CD79A	1.1535	0.3756	0.683	0.362	0.3387	0.7809	0.145	0.3895	0.4694	0.6774	0.7647	0.5042	0.6558	0.4793	1.0991	1.012	1.1212	0.9682	0.3933	0.4548	0.6004	0.4413	0.2651	0.3153	0.1856	0.5167	0.6726	0.4501	1.0529	0.2676	0.307	0.5234	0.2174	0.5287	0.2089	0.6111	0.5491	0.9708	0.6519	0.2513	0.338	0.9379	0.4509	0.3383	0.448	0.6363	0.3249	0.4603	0.2794
NCOA4P3	0	0	0	0.0297	0.0293	0.0199	0	0.0069	0	0	0	0.0058	0.0168	0	0	0.0087	0.0086	0	0	0	0.0117	0.0062	0.0187	0.0072	0.0124	0	0	0.0328	0	0.0245	0	0.0182	0	0	0.0152	0.0138	0	0	0.0224	0.0067	0	0	0.0172	0	0	0.0351	0.0124	0	0.0107
AC067942.1	0.3444	0.2363	0.1026	0.1308	0.129	0.0374	0.8466	0.0784	0.2127	0.2034	0.2231	0.2248	0.1124	0.2412	0.2225	0.1753	0.2042	0.2678	0.1471	0.1717	0.3833	0.1091	0.0707	0.1632	0.1168	0.2251	0.0821	0.5684	0.0853	0.1539	0.0515	0.4352	0.3283	0.3679	0.1912	0.156	0.1157	0.1454	0.2156	0.0675	0.3926	0.9179	0.6701	0.0851	0.1597	0.2872	0.109	0.1159	4.0316
AC010733.1	0.9542	1.8477	1.1845	1.357	0.5146	0.5575	2.6085	0.5191	0.6158	1.559	0.6231	0.9989	0.5753	0.939	1.3209	0.8973	1.2407	1.0369	1.4741	0.9437	0.9331	1.1608	0.8769	0.6415	0.8697	0.9538	0.764	1.1962	0.5897	0.7737	0.831	0.8955	1.9429	0.7868	0.6406	1.0001	0.5743	0.7818	1.4312	1.5384	0.7796	1.5135	1.1267	0.4755	0.6297	1.0144	1.0149	0.8627	5.0866
PRELID1P1	0.2781	0.2149	0.1018	0.4326	0.198	0.2476	0.1448	0.2305	0.4297	0.5143	0.3874	0.3117	0.2439	0.5983	0.338	0.0906	0.1777	0.5313	0.1683	0.2163	0.195	0.3093	0.1817	0.1949	0.2189	0.3851	0.2036	0.3541	0.2014	0.1782	0.071	0.1326	0.4175	0.647	0.0948	0.1576	0.2125	0.1335	0.2635	0.1394	0.2597	0.0434	0.1787	0.352	0.3263	0.3774	0.1674	0.3657	0.3765
ARMC10	9.9231	13.7509	7.2528	7.4394	6.1154	12.0358	6.5043	5.9428	8.8272	9.3013	8.0562	12.0383	11.2256	9.6907	12.032	16.2762	7.8771	7.7235	12.5823	10.7519	12.3649	7.0228	7.7387	7.5199	7.6607	10.178	8.7627	7.968	8.8405	7.9583	7.5167	11.0293	8.2394	8.8329	10.292	8.2477	7.7608	9.6309	7.98	14.6352	12.1335	8.9725	14.7441	14.0031	10.8833	9.2965	12.224	7.8693	20.2286
LLPHP2	0	0.0445	0.0387	0	0.0347	0.1411	0	0.0657	0.0445	0	0	0.0273	0	0	0.0227	0	0.0811	0	0	0.0308	0	0.0882	0	0.0684	0.3523	0	0	0.0621	0.0459	0.058	0.0324	0	0.0317	0	0.0721	0	0.0485	0	0.0353	0.0318	0	0	0.163	0	0	0.111	0.0294	0.0397	0
TMEM267	3.2296	4.212	3.4156	3.8482	5.0095	4.0586	9.7368	2.2577	9.1826	6.9286	4.6102	4.285	3.5795	5.5574	4.2104	4.3399	2.9271	5.6057	3.979	7.7155	14.5663	3.5965	3.5259	3.8197	4.1305	4.349	5.3065	4.5063	3.6402	5.6836	3.8151	10.3208	16.7284	9.036	3.1317	4.8378	4.2846	3.6389	4.2109	4.489	11.3106	7.8981	5.1043	4.8306	3.4251	4.3306	4.0354	4.1976	9.644
CNPY2	10.1163	11.0467	11.1752	4.0215	5.8777	7.2097	8.1536	4.8063	18.3909	15.2874	12.0483	15.345	8.1484	12.6109	15.2831	7.9948	9.2404	16.3974	11.9186	15.5108	11.2208	9.2041	6.0229	12.897	7.7006	16.4206	7.5295	7.1235	8.2947	6.5113	6.725	6.1089	15.8183	24.6911	7.3528	9.803	6.9147	10.1574	12.0894	9.5703	11.7134	16.3391	12.5221	9.7354	9.3117	7.6278	7.0646	7.4741	11.4531
AC087645.1	0	0	0	0	0	0	0	0	0.0606	0	0	0	0	0	0.0309	0.0562	0.0551	0	0	0	0	0	0.0806	0.0465	0	0	0	0	0	0	0	0	0	0	0	0	0	0	0	0.0433	0	0	0.3327	0	0	0	0	0	0
IGHV3-62	0.0352	0	0	0	0	0	0	0	0	0	0.049	0	0	0	0	0	0.236	0	0	0	0	0	0	0	0	0	0	0	0	0	0.0754	0	0	0	0	0	0	0	0	0	0	0	0	0	0	0	0	0	0
AC003685.1	0	0	0	0	0	0	0	0	0	0	0	0	0	0	0	0	0.0344	0.1373	0	0	0	0	0	0.0291	0.0249	0	0.0657	0.0792	0	0	0	0	0.027	0	0	0	0	0	0	0	0	0	0.9349	0	0.0301	0	0	0	0
KANK1P1	0	0	0	0	0	0.0453	0.0353	0.0105	0	0	0	0	0	0	0	0	0	0.013	0	0	0	0	0	0.0219	0	0	0	0.0299	0	0	0	0	0	0.0379	0	0.021	0	0	0	0	0	0	0.0131	0	0	0.0089	0.0094	0	0.0162
AC006238.1	0.0672	0.033	0	0	0.0515	0.0698	0	0.0731	0.4624	0	0	0.0608	0.0982	0.1839	0.0336	0	0.1503	0	0	0.2286	0.3297	0.1308	0.0658	0.1775	0.1089	0.0217	0.3155	0.1382	0	0.0215	0.048	0.1601	0.3295	0.0438	0.1871	0.3149	0.0359	0	0.1573	0.0236	0.0366	0.1833	0.5137	0.0893	0.0788	0.0618	0.0653	0.0589	0
AC008873.1	0	0	0.3331	0	0	0	0.1579	0	0	0	0	0	0	0	0.0651	0	0	0	0	0.0885	0.1595	0	0.0849	0	0.1685	0.084	0	0	0.2636	0	0	0.1239	0	0	0.1034	0	0	0	0	0.0912	0.2832	0	0.4677	0	0.2033	0	0.0843	0.1139	0
AC012038.2	0.1401	0.0689	0	0	0	0	0.1703	0.0508	0	0	0	0.1269	0.041	0	0	0	0	0.0625	0	0	0	0.1364	0	0	0	0	0	0	0	0.0449	0	0	0.1473	0	0	0	0	0	0	0	0	0.0765	0	0	0	0	0	0	0
RNU6-275P	0	0	0	0	0.1286	0	0	0	0	0	0.3114	0	0	0	0	0	0	0	0	0	0	0	0	0	0	0	0	0.2299	0	0	0	0	0	0	0	0	0	0	0	0	0	0	0.6032	0	0	0	0	0	0
GTF2IP2	0	0	0	0	0.0197	0	0	0	0	0	0	0	0	0	0	0.0235	0	0	0	0	0	0	0.0168	0.0583	0	0	0	0.0529	0.0261	0	0	0.0245	0	0	0	0	0	0	0	0.0181	0	0	0.0232	0	0	0	0	0	0
AC079612.1	0.0162	0	0.0041	0	0.0037	0	0	0.0141	0	0	0	0	0	0	0.0024	0	0	0.0216	0	0	0	0	0	0	0	0	0	0.0432	0	0	0	0	0	0	0	0.007	0	0.0098	0	0	0	0	0.0698	0	0	0	0.0031	0	0
GATC	6.3218	14.5494	11.6213	2.9439	6.1752	11.5854	5.0513	7.3085	12.9799	10.5222	7.3948	10.3361	9.5044	7.86	11.9888	7.667	9.8497	6.6433	10.9617	9.9959	7.2022	9.8396	10.0217	10.2715	13.2057	12.337	9.1174	8.478	11.4516	13.4529	8.6461	9.339	6.4025	8.842	8.8525	11.1811	8.5459	7.3954	7.249	11.2547	6.2968	5.4988	11.5708	8.567	8.9879	8.7336	11.6459	9.7898	5.1191
FAM193B	4.767	9.9148	8.1545	2.8247	6.9684	8.1816	3.9274	6.6734	8.2785	8.0814	5.3872	6.5581	6.5457	7.3621	7.1233	6.4557	6.3569	7.7864	8.2585	13.1746	9.6473	9.0546	6.7388	10.1513	7.8659	6.4939	7.7884	8.4789	6.2271	8.1054	6.1236	27.2621	8.0996	10.7089	5.3406	6.2141	6.9905	2.2417	8.6148	4.1215	4.5113	4.2232	7.4229	7.6332	6.0816	8.0765	6.4328	7.7188	1.1198
SNAPC2	13.266	8.3796	7.906	12.9132	8.8111	7.6287	4.1187	11.3516	7.8405	9.0379	13.0099	12.0274	12.3107	10.0357	14.1088	11.3175	12.0283	11.8898	6.5025	10.6568	13.3709	6.3189	7.261	9.9844	9.2831	8.8027	10.7303	10.6331	7.2485	8.4343	7.8312	12.4063	17.3728	9.6813	3.9388	12.5224	10.1048	9.3633	10.7223	9.6125	4.6212	4.9826	8.8908	15.39	13.4329	7.5965	7.2323	10.4963	2.1697
PMM2P1	0	0	0	0	0	0	0	0	0	0	0	0	0	0	0	0	0	0	0	0	0	0	0	0.0185	0	0	0	0.0337	0	0	0	0	0	0	0	0.0177	0	0	0	0	0	0	0.0442	0	0	0	0	0	0
PLXNA4	1.1247	1.015	0.7674	0.1517	3.6181	0.3084	0.0572	0.8853	3.0835	1.571	1.2647	0.3531	0.2562	0.169	1.037	0.0509	0.4872	0.3194	0.423	0.0537	5.6369	0.4741	2.1498	0.2439	0.2571	1.5185	0.9908	1.4041	1.5232	1.2121	0.7515	5.9556	3.1531	0.2284	2.3352	0.399	1.8229	0.4176	0.177	0.0892	0.8915	0.6146	2.1525	1.0502	0.6778	0.9488	0.1136	0.874	0.513
RNU6-961P	0	0	0	0	0	0	0	0	0	0	0	0	0	0	0	0	0	0	0	0	0	0	0	0	0	0	0	0	0	0	0	0	0	0	0	0	0	0	0	0	0	0	0.1537	0	0	0	0	0	0
RILPL2	3.0919	2.5366	2.8643	1.0133	1.1985	2.0113	0.4507	1.3051	9.6855	3.0918	2.5091	4.4741	3.1829	3.2444	3.3669	1.7151	2.1142	2.2161	4.7937	4.4944	7.6914	2.9448	1.4009	4.5458	2.4289	2.8234	3.1355	1.9769	3.4833	3.4149	3.1912	4.7923	2.3143	2.0665	1.5803	4.8093	2.0252	1.8772	1.9808	4.5698	2.2019	1.865	2.5592	2.4764	1.8527	2.2198	3.908	2.5017	1.1006
ZNF70	2.832	2.6345	4.3527	1.6564	2.8789	4.2833	0.4375	5.0396	2.8609	3.6579	1.8621	3.8087	2.8426	2.8326	2.5362	2.2014	3.7618	2.6861	2.2197	3.6248	3.7001	2.6235	4.9683	2.2173	2.5975	3.8533	3.8627	5.0911	2.3748	3.973	3.9854	4.1392	1.461	0.8151	2.8464	3.2789	2.6333	2.1647	4.4213	2.7093	1.0047	0.9133	2.2698	2.4557	3.1628	3.3057	2.7759	4.5875	0.3812
NTRK1	0.5792	0.1417	1.2029	0.7271	0.6695	1.6123	0.1601	0.1852	0.0081	1.4926	0.7189	0.4623	3.7553	1.026	0.1072	1.2841	1.26	0.5066	0.8181	3.035	0.0657	0.8789	0.4009	2.9028	5.2977	0.165	2.2506	0.0593	1.545	1.5564	0.4531	0.0393	0.0087	4.2734	0.3014	0.493	2.6832	1.708	0.2989	1.3902	0.2198	0.6382	0.363	1.0834	0.0225	1.3906	0.6647	0.3032	0.1836
RPL36AP48	0.3427	0.5618	0.2928	0.2666	0.1314	0.2966	2.0126	0.0829	0.1124	0.7964	0.2122	0.4137	0.4341	0.4692	0.5147	0.2083	0.3067	0.6621	0.2689	0.311	0.4206	0.2224	0.4106	0.2587	0.1111	0.7013	0.2439	0.5092	0.0579	0.2196	0.0816	0.2178	0.3202	0.4466	0.1818	0.0824	0.1834	0.3072	0.3121	0.2005	0.1867	1.4964	0.6166	0.1518	0.1787	0.3151	0.1111	0.2504	0.8916
CTSD	72.1232	51.0589	57.4503	81.1244	76.9527	50.7446	35.9399	46.4498	68.368	72.7385	64.7934	85.0645	72.1858	41.6849	42.5905	73.512	82.811	63.9932	37.5691	59.3748	92.1708	120.1338	54.6602	130.0955	38.3387	60.4159	68.1217	51.4547	75.414	68.685	88.9152	132.0697	42.0857	43.5464	49.699	168.9755	58.2747	115.7145	53.6154	84.8848	56.5739	36.7794	42.4025	58.4492	48.1829	59.5825	58.9088	52.5804	15.4697
AL390729.2	0.1533	0.6785	0.1964	0.1789	0.2646	0.1194	0.9779	0.0834	0.6784	0.229	0.4271	0.347	0.1344	0	0.4029	0.1048	0.1029	0.5126	0.5413	0.3913	0.7054	0.2238	0.0751	0	0.0745	0.3715	0.0982	0.2365	0.4664	0.1473	0	0.2192	0.9666	0.2247	0.0915	0.2488	0	0.2319	0.0897	0.4035	1.002	0.3765	0.8275	0.2037	0.1799	0.4933	0.0745	0.1008	2.1792
LINC00974	0.0056	0.0082	0	0	0.0064	0	0	0.0061	0	0	0	0.0101	0.0147	0.0076	0.0126	0	0	0	0.0158	0	0.0103	0.0272	0.0055	0.0063	0	0	0	0.0115	0.017	0.0054	0.006	0.008	0.0176	0.0055	0	0.006	0	0.0056	0	0.0118	0	0	0.0904	0	0.0131	0	0	0	0
FAM92B	0.0063	0.0463	0.169	0	1.7051	0.0489	0.0114	0.1367	0.0741	0.1782	0.2625	0.1649	0	0.2408	0.1462	0.0687	0.1264	0	0.2218	0.1475	0.1272	0.1161	0.0246	0.064	0.1343	0.0609	0.1448	0.0775	0.3153	0.1448	0.0673	0	0.0396	0.043	0.0525	0.0815	0.0202	0.1013	0.0588	0.1653	1.252	0.0925	0.2712	0.3088	0.0589	0.0058	0.0977	0.0165	0.147
FAM138D	0	0	0	0	0	0	0	0.0101	0	0	0	0	0	0	0	0	0	0	0	0	0	0	0	0.0315	0	0	0	0	0	0	0	0	0	0.0091	0	0	0	0	0	0	0	0	0	0	0.0109	0	0	0	0
AL590004.3	0.0864	1.7766	0.0347	0.1818	0.0234	0.4407	0.0185	0.0424	0.03	0.0481	0.0307	0.069	0.0193	0.2273	0.0242	0.0927	0.2159	0.0294	0.1411	0.2334	0.5237	0.0692	0.0249	0.092	0.4051	0.0525	0.026	0.0662	0.0876	0.4118	0.0399	0.3003	0.0481	0.0199	0.0768	0.1777	0.019	0.2459	0.0218	0.0428	0.0055	0.0194	0.0549	0.0428	0.0954	0.0716	0.1071	0.0178	0.0113
FASTK	22.3926	12.5366	11.8266	28.7083	13.7277	8.3428	6.174	11.9471	13.6337	11.5947	9.1674	10.1287	7.4436	13.8071	19.5934	7.5649	18.3345	16.1387	8.7444	16.2013	12.5233	8.7407	8.9761	10.585	8.167	14.4838	10.6683	11.2427	10.7272	10.1259	11.7087	11.4421	13.623	15.7361	9.1102	10.2539	10.5773	9.0667	10.8414	7.4018	7.3178	7.2446	14.3588	17.0516	8.1447	8.7572	10.3165	9.8854	1.6607
P3H1	19.1757	8.6902	12.4979	8.294	11.9308	10.8896	12.1232	17.2563	10.8373	6.4493	5.9384	9.9553	12.504	12.3887	10.9869	10.8677	11.1101	9.7732	6.9795	12.2685	9.554	9.6453	15.9995	7.8696	10.837	8.3868	9.4249	15.4883	9.3662	12.9804	13.819	9.1997	4.2383	8.701	8.4433	12.3781	9.8458	15.7243	14.3929	7.7706	10.1165	8.7559	9.1887	7.6635	18.2508	12.4233	8.6029	14.0329	3.7329
RN7SL255P	0.4443	0	0	0	0	0	0	0	0.5959	0	0	0	0	0	0.4246	0	0	0	0	0	0	0.4718	0	0	0	0.9006	0	0.0416	0.1229	0	0	0	0	0	0.8196	0.1311	0	0.0407	0	0	0.2641	0	0.0545	0	0	0	0	0	0
AL109620.1	0	0	0	0	0	0	0	0	0	0	0	0	0	0	0	0	0	0	0	0	0	0	0	0	0	0	0	0.0103	0	0	0	0	0	0	0	0	0	0	0	0	0	0	0	0	0.0234	0	0	0	0
SLC7A4	0.3469	0.5695	0.3381	0.0513	0.3935	1.0125	0.0089	0.1542	0.6415	0.9562	0.4697	0.668	0.5399	0.1873	0.3559	0.5013	1.1543	0.2157	1.1527	0.9828	0.4767	2.1828	0.206	1.0512	0.6604	0.2084	1.6151	0.1659	0.7954	0.9298	1.5399	0.5032	0.2003	0.3964	0.7173	1.5384	0.3765	0.2513	0.1659	1.8471	0.4951	0.136	0.4022	1.4741	0.0057	2.3407	1.9862	0.3791	0.0245
TMIGD2	0.0758	0.1118	0.2064	0.2432	0.2725	0.1771	0.1381	0.2371	0	0.1557	0.1584	0.2059	0.0582	0.3373	0.1138	0.0389	0.1017	0.1901	0.1338	0.2612	0.157	0.2029	0.1022	0.1395	0.2119	0.1469	0.6554	0.0292	0.2162	0.1366	0.2133	0.0678	0.0199	0.3148	0.0226	0.1333	0.1977	0.172	0.2107	0.1297	0.0774	0.1551	0.3964	0.1007	0.0556	0.1132	0.0461	0.1495	0.0158
PLCD4	2.0726	1.1727	1.5982	4.9466	1.3084	1.5908	0.3046	0.9957	2.4142	0.7885	2.209	1.1588	0.6452	1.4566	1.3267	0.8028	0.941	5.9447	1.1947	1.5376	6.5275	1.0612	1.2905	1.433	1.5317	1.8234	1.5979	2.1446	1.5315	1.4493	1.4855	2.4541	1.2123	0.6553	1.3743	2.2027	0.7687	1.5004	1.4291	1.882	0.1865	0.8309	1.1083	0.9344	1.3056	1.3903	1.1514	1.7261	0.0205
WNT1	0.0178	0.0393	0.0341	0.0829	8.5583	0.0415	0.0162	0.0193	0.4845	0.0398	0.2721	0.0321	0.0856	0	0.0333	0.0486	0.0119	0.1068	0.0627	0	0.0327	0.0432	0.0348	0.0402	0.0777	0.0086	0.0227	0.0274	0.0135	0.0171	0.0761	0.0127	0.0187	0.026	0.0212	0.0288	0.057	0.0179	0	0.028	4.0908	0	0.024	0.0118	0.1042	0.0082	0.0777	0.0233	0
ZNF648	0.0229	1.9145	0.2225	0.0459	0.0528	0.4646	0.006	0.1284	0.058	0.0734	0.0228	0.2284	0.1264	0.0808	0.0812	0.2286	0.1539	0.0307	0.2361	0.5821	0.0483	4.0788	0.045	0.2003	4.2628	0.2795	0.1301	0.3202	0.1396	1.4517	0.2529	0.0937	0.0069	0.285	0.1643	0.6913	1.0309	0.0595	0.046	0.483	0.0428	0.0697	0.0354	0.0566	0.0154	0.1627	0.5003	0.0474	0.0219
AC012618.3	0.465	1.9653	1.8786	0.184	1.6958	1.1666	0.2011	1.8439	1.6046	1.6602	0.8236	1.5129	1.8802	1.921	1.5861	3.7626	0.8992	1.0015	1.9706	2.3738	4.222	1.772	1.8775	1.5171	0.6131	1.5357	0.8987	1.8162	1.4269	2.3709	1.1744	5.7489	1.0354	0.7472	1.5804	2.1745	1.4929	0.6995	1.3564	1.1204	1.1979	0.1678	1.2445	2.315	1.2485	1.2392	2.8436	1.928	0.5932
VN2R19P	0.0227	0.3522	0.0291	0.0265	0.0654	0.0177	0	0.0742	0.4695	0.017	0.1267	0.0823	0.0299	0.4669	0.0597	0.0155	0	0.0152	0.0482	0.2553	0.4394	0.1217	0.1003	0.0772	0.2321	0.1873	0.0582	0.152	0.0346	0.0328	0.0609	3.9825	0.0239	0.0778	0.2849	0.3812	0.0547	0.0458	0.0133	0.0957	0	0.0186	0.0614	0.1813	0.1467	0.0418	0.4311	0.0897	0.1521
ZNF670	0.8215	2.7161	2.5357	1.0776	2.9942	3.8118	0.8962	2.8774	2.0788	0.7524	1.4703	2.0142	2.3086	2.3071	1.7199	3.3218	2.5916	2.3899	5.7174	2.3692	2.0641	3.7759	5.4078	3.3472	7.2296	1.8658	5.631	4.7126	4.2874	5.1289	2.7511	3.4046	1.1911	3.018	3.7861	1.57	3.8115	0.9071	3.0958	4.9186	2.5968	3.8979	2.2415	1.2432	2.6384	3.8979	5.0732	3.6118	4.7536
ANKS1B	1.1824	0.3926	0.8664	0.4784	2.025	4.1024	0.1084	0.3143	0.0335	0.2941	0.3542	1.1156	0.2543	0.4369	0.4865	0.4232	0.6839	1.5307	0.9871	1.1199	0.7029	1.1213	0.842	0.3883	0.9919	0.4897	0.9964	0.6132	0.9857	0.9128	0.5392	0.7813	2.0794	0.6248	0.8535	0.3535	0.132	0.3447	0.5598	0.328	1.6848	1.2913	0.7606	1.0941	0.3008	1.1349	1.7368	0.525	0.2587
AL513165.1	6.1645	8.729	9.543	5.1659	9.9962	15.5996	3.0162	9.9042	12.39	12.6081	13.8913	13.2606	8.4179	19.1473	12.3951	11.1484	9.6069	14.8296	16.0713	10.7287	10.9668	18.3212	9.6524	11.9923	9.6545	9.3843	13.1449	14.3852	13.406	11.8488	8.2046	10.9466	12.1314	3.356	11.1107	14.7269	9.1645	4.3393	11.7698	25.0493	2.2312	2.7097	6.7558	11.6568	15.8253	10.6511	15.4496	13.1131	2.4218
C15orf48	0.2042	1.6072	0.1854	0.6852	0.3525	0.1326	5.9715	0.2593	0.3013	0.3178	0.6639	1.071	0.3284	0.3496	0.5304	0.1979	1.9875	0.7171	0.3246	0.1477	0.376	0.1408	0.2419	0.6456	0.1903	0.7424	0.6432	0.5428	0.6085	0.2699	0.3284	0.2069	0.4561	0.6487	0.0609	0.0829	0.3005	3.1583	0.3686	0.0986	2.6007	1.4213	0.4709	0.3845	0.2197	0.133	0.1572	0.2798	0.7116
AC010181.2	0	0	0	0	0	0	0	0	0	0	0	0	0	0.034	0	0	0	0	0	0	0	0	0	0	0	0.024	0	0.0255	0	0	0	0	0	0.0485	0	0	0.0398	0	0	0	0	0	0	0	0	0	0	0	0
CCDC32	1.4932	2.0114	2.057	1.8667	1.3219	1.8591	0.6023	2.4628	1.3319	1.1112	1.2848	1.5147	2.7852	1.7341	1.2063	1.4619	1.4308	1.1169	1.83	1.4977	1.8681	1.2393	1.5085	2.0852	1.636	1.438	1.8439	2.1064	2.0739	1.6051	2.1416	1.9319	0.7585	0.8945	1.9143	1.7397	1.3183	1.5171	1.7805	1.4602	1.9409	1.6051	1.7483	2.1627	1.6125	2.189	1.3284	1.7965	2.5413
IGLV3-24	0	0	0	0	0	0	0	0	0	0.0907	0	0	0	0	0	0	0	0	0	0	0	0	0	0	0	0	0	0	0	0	0	0	0	0	0	0	0	0	0	0	0	0	0	0	0	0	0	0	0
RPL10P8	1.337	0.4509	0.2448	1.2036	0.2198	0.2976	2.3672	0.5404	0.5635	0.0571	0.3725	0.415	0.737	1.0461	0.6884	0.1568	0.6666	0.7664	0.2698	0.546	0.2813	0.2231	0.3745	0.346	0.0743	0.3703	0.3426	1.3361	0.4649	0.1468	0.4914	0.1093	1.365	0.8587	0.0912	0.4133	0.3679	0.6164	0.9839	0.0804	0.1873	1.6263	0.8248	0.4569	0.762	1.1942	0.2229	0.5526	1.5333
RNU6-1108P	0	0	0	0	0	0	0	0	0	0	0	0	0	0	0	0	0	0	0	0	0	0	0	0	0	0	0	0	0	0	0	0	0	0	0	0	0	0	0	0	0	0	0.3103	0	0	0	0	0	0
LINC02311	0	0	0	0	0.0167	0	0.0264	0	0	0	0	0	0	0	0	0	0	0	0	0	0	0	0	0.0329	0	0.0141	0	0	0	0	0	0	0	0	0	0	0	0	0	0	0	0	0	0	0	0	0	0	0
HNRNPDLP3	0	0	0	0	0	0	0	0	0	0	0	0	0	0	0	0	0	0	0	0	0	0	0	0	0	0	0	0	0	0	0	0	0	0	0	0	0	0	0	0	0	0	0	0	0	0	0	0	0
LINC00847	4.4941	6.1201	5.0094	2.0249	5.2211	6.9566	8.4219	5.4312	9.9017	5.0315	0.2716	4.7487	4.3346	13.0211	2.1155	5.2471	6.0648	7.5818	8.4206	7.9871	11.6913	4.54	5.4948	6.1923	4.692	8.6559	8.5988	4.588	5.0126	4.1832	0.6584	10.2616	6.9568	13.8624	6.3356	7.457	3.6069	1.0126	5.8662	1.5705	6.978	3.392	5.2821	6.8537	5.5076	1.6179	4.8633	8.34	4.6712
OPN3	2.8798	4.7306	3.3297	4.155	2.374	4.4923	0.1773	4.0483	1.8961	1.1883	0.9292	2.1859	3.0587	2.7587	2.1675	4.5615	2.597	0.6737	2.689	3.3373	3.1525	2.7487	4.454	5.656	5.546	4.9903	4.0142	5.3173	4.2012	4.6037	4.4722	6.1654	0.5732	2.1524	6.5882	3.3788	5.6596	2.2421	2.7898	3.6395	1.9585	1.8599	4.5801	3.601	4.1248	3.4558	6.8339	3.8969	0.7146
RNA5SP34	0	0	0	0	0	0	0	0	0	0	0	0	0	0	0	0	0	0	0	0	0	0	0	0	0	0	0	0	0	0	0	0	0	0	0	0	0	0	0	0	0	0	0	0	0	0	0	0	0
TDGF1P7	0.6631	1.4517	1.1238	0.3744	0.123	1.8996	0	0.6051	1.5146	0.3515	0.4172	1.8979	1.5007	1.7865	1.6061	1.6091	0.1435	0.6294	0.2417	2.2274	0.8268	1.5613	1.6145	0.7266	2.2045	1.0159	1.7538	0.9901	0.4555	1.5212	1.2381	0.673	0.0674	0.9825	0.8935	0.8563	3.1243	0.2157	0.7763	0.7432	0.9438	0.5253	1.1835	0.7391	0.6776	0.8063	2.6625	1.4628	0.6081
AL136529.1	0	0	0	0	0	0	0	0.0213	0	0	0	0	0.0344	0	0.0147	0	0	0.0262	0	0.04	0.1082	0	0	0.0444	0.0191	0.019	0.0753	0.0605	0	0.0188	0.021	0	0	0	0	0.0424	0	0.0198	0	0.0206	0	0.0963	0.0265	0.0521	0.023	0.0541	0.0572	0	0
BCAS3	3.9907	2.0677	2.9225	2.2567	2.5196	3.6749	0.5609	3.2326	4.1249	3.6425	2.8466	2.4948	3.018	2.7605	2.9704	5.1478	2.2987	1.6521	4.7903	4.0924	3.1416	3.7049	3.1614	1.9756	2.5035	3.136	4.2143	2.108	3.6513	3.216	4.794	4.8465	0.8492	2.1021	3.4112	6.8191	5.4993	1.6519	2.3811	3.5548	1.3869	1.1161	2.6658	1.6575	2.6321	3.1968	3.5905	3.4231	0.502
GPAA1P2	0.0067	0.0494	0.0429	0.0156	0.0154	0.0521	0	0.0073	0.0888	0.03	0.0093	0.0182	0.0469	0.0092	0.0151	0.0092	0.1437	0.0984	0.0284	0.3006	0.1355	0.0391	0.0197	0.0985	0.026	0.0065	0.0257	0.0206	0.0102	0.0579	0.0072	0.0287	0.0984	0.0065	0.008	0.0145	0.043	0.0135	0	0.007	0.0328	0.011	0.0271	0.0356	0	0.0369	0.0195	0.0528	0
RPS28P8	0	0	0	0	0.1323	0	0	0	0	0	0	0	0	0	0	0	0	0	0	0	0	0	0	0	0	0	0	0	0	0	0	0	0.0604	0	0	0	0	0	0	0	0	0	0	0	0	0	0	0	0
OR11K1P	0	0	0	0	0	0	0.0241	0	0	0	0	0	0	0	0	0	0	0	0	0	0	0	0	0	0	0	0	0	0	0	0	0	0	0	0	0	0	0.0133	0	0	0	0	0	0	0	0	0	0	0
TEDDM2P	0	0	0	0	0.035	0	0	0	0	0	0	0	0	0	0	0	0	0	0	0	0.028	0	0	0	0	0	0	0.0156	0.0231	0	0	0	0	0	0	0	0	0	0	0	0	0	0.1026	0	0	0	0	0	0
RN7SL352P	0	0	0	0	0	0	0	0	0	0	0	0	0	0	0	0	0	0	0	0	0.2384	0	0	0	0	0.0837	0	0	0	0	0	0	0	0	0	0	0	0	0	0	0	0	0	0	0	0	0	0	0
DPF1	0.3089	0.6726	0.881	0.186	2.8287	0.3609	0.1407	0.721	0.4336	0.6959	1.3257	1.5517	0.5374	0.7197	2.512	0.2249	0.2307	0.9295	0.292	0.5519	0.4173	1.4061	1.9705	0.4259	0.3052	0.8041	1.152	1.8629	1.0383	0.5027	0.7183	0.228	0.4189	0.2897	0.6392	0.9082	0.7677	0.5904	1.3706	1.8229	0.7816	0.3834	0.5816	2.089	1.6426	0.8749	0.7727	1.1499	0.0875
RNU6-1103P	0	0	0	0	0.1286	0	0	0	0	0	0	0	0	0	0	0	0	0	0	0	0	0	0	0	0	0	0	0.115	0	0	0	0	0	0	0	0	0	0	0	0	0	0	0	0	0	0	0	0	0
AC083801.1	0	0	0	0	0	0	0	0	0	0	0	0	0	0	0	0	0	0	0	0	0	0	0	0.0756	0	0	0	0	0	0	0	0	0	0	0	0	0	0	0	0	0	0	0.0901	0	0	0	0	0	0
AC055876.3	0	0.3063	0	0	0.1433	0	0	0	0	0	0	0	0	0	0	0	0	0	0	0	0	0.0404	0	0.047	0	0	0	0.0427	0	0	0	0	0	0	0	0	0	0	0	0	0.1357	0	0	0	0	0	0.0404	0	0.0694
B3GNTL1P1	0.0414	0.4273	0.2121	0.0966	0	0	0	0.045	0	0	0.2882	0.1873	0.1089	0.0566	0	0.1132	0.0555	0	0.1169	0	0	0	0	0.1405	0.2414	0.2406	0	0.2128	0.0629	0.0398	0	0	0	0.0404	0	0	0	0.2086	0.0969	0.0436	0.4733	0	0.7258	0	0.0971	0	0	0.0544	0.0692
ARID3C	0.1017	0.175	0.1412	0.089	0.1462	0.2905	0.1081	0.2121	0.2125	0.2152	0.0826	0.2072	0.3642	0.4293	0.3881	0.1391	0.3071	0.1473	0.0239	0.2163	0.1248	0.0412	0.0748	0.2207	0.0494	0.115	0.3257	0.1743	0.116	0.171	0.1635	0.1212	1.4249	0.2402	0.2832	0.2567	0.136	0.1026	0.129	0.116	0.0554	0.0139	0.4689	0.4054	0.2486	0.1714	0.2884	0.234	0
NBAS	7.2371	31.9782	22.3097	4.2881	11.9548	29.1682	3.3706	19.2176	14.5145	17.3186	15.191	17.7836	27.4469	15.7805	16.0264	38.2678	26.0043	6.432	22.1557	23.346	11.3123	60.2476	26.9493	34.5838	36.7622	12.8905	25.5621	24.2435	19.7953	31.1211	37.7232	16.311	4.8507	17.4053	24.791	21.8508	31.918	12.1096	15.1273	23.9545	10.9317	6.6536	23.4245	25.0435	25.4275	23.4379	30.5071	27.116	17.2551
ATAD5	1.6477	7.3881	5.113	1.0018	2.796	4.5474	2.6243	2.9239	4.1012	3.1911	2.7171	2.3457	2.4025	2.8115	2.6915	2.6052	2.0211	2.0998	6.0611	3.3559	3.0954	5.5611	5.6906	3.8366	5.255	4.0627	3.9015	4.3723	3.4913	5.0999	3.2083	2.811	1.6056	2.0431	6.368	3.3406	5.1162	1.1556	3.4109	5.3278	2.4967	2.1031	3.9136	1.5161	1.8758	5.6172	6.8088	4.3807	1.2917
AC098829.1	0.145	0.7391	0.5575	0.0923	0.2578	0.0822	0.1442	0.1434	0.175	0.8074	0.1837	0.0239	0.0462	0.3791	0.1584	0.3426	0.637	0.1587	2.4766	0.2153	2.6693	3.0536	0.0388	0.806	0.7434	0.2939	0.4729	0.0678	0.4011	0.19	0.7772	2.3756	3.8655	4.097	0.2675	0.6704	0.3174	0.3988	0.2778	0.3609	0	0.3669	0.4448	0.1051	0.0464	0.4848	0.5769	0.0693	0.463
NOV	57.9095	1.8215	9.4292	28.9179	14.0139	6.0146	9.6365	25.0961	3.2665	12.3287	14.6388	7.1321	19.5795	1.7701	1.3838	12.3716	0.4683	45.9647	10.533	4.1147	7.0566	5.2286	9.5458	11.963	5.3366	14.0616	2.0745	52.0657	7.601	19.2633	3.1119	5.9368	5.0255	6.7061	3.8334	7.0417	2.3335	28.6008	21.015	2.2608	10.4315	49.0141	2.5897	0.3389	1.8317	4.8202	4.0672	1.7884	7.3465
RNU6-958P	0	0	0.2891	0	0	0	0	0	0	0	0	0	0.1979	0	0.1694	0	0	0	0	0	0	0	0	0.1277	0	0	0	0	0	0.1084	0	0	0	0	0.1346	0.122	0	0	0	0	0	0	0.3044	0	0	0.2074	0	0	0
AC092652.2	0	0	0.0173	0.0158	0.2334	0.0211	0.074	0	0	0.0202	0	0.0122	0	0.037	0.0102	0	0.0908	0.0724	0	0.0276	0	0.0263	0.053	0.0153	0.0395	0.1311	0.0173	0.0557	0.0206	0.026	0	0.058	0	0.0132	0.0484	0.0146	0	0.1773	0.0792	0.0142	0.0442	0	0.146	0.5033	0	0	0.0263	0.1067	0
HS3ST3A1	2.0428	6.1355	3.3757	0.6424	3.7951	2.3606	1.816	3.9507	1.678	5.7296	1.0522	2.8053	10.5739	0.4859	1.1889	2.0163	6.3754	2.6774	5.0771	0.8547	2.0351	5.296	11.413	3.0342	5.4943	1.5348	6.8022	10.8348	1.585	4.2719	0.9266	2.785	0.7412	3.7306	3.2854	2.3382	5.5211	1.2802	7.2972	5.9405	2.2975	5.1403	1.6332	1.5117	10.3297	3.7691	2.8803	5.7263	0.2435
MIR4717	0	0	0	0	0	0	0	0	0	0	0	0.1504	0	0	0	0	0	0	0	0	0	0	0	0	0	0	0	0	0	0	0	0	0	0	0	0	0	0	0	0.1749	0	0	0	0	0	0	0	0	0
BPIFA4P	0	0	0	0	0.0239	0	0	0	0	0	0.029	0	0	0	0	0	0	0	0	0	0	0	0.0068	0.0078	0	0	0	0.0214	0	0	0	0	0	0	0	0.0075	0	0	0	0.0073	0	0	0.0468	0	0.0081	0.0064	0	0	0
TDH	0.0694	0.0931	0.0566	0.0589	0.1888	0.0197	0.023	0.0412	0.0279	0.0377	0.0352	0.0514	0.0055	0.0259	0.1469	0.0432	0.0678	0.1013	0.1516	0.1096	0.0116	0.0737	0.0371	0.2645	0.2026	0.1958	0.0566	0.8637	0.0384	0.0728	0.0406	0.0632	0.0133	0.1049	0.0301	0.1981	0.1115	0.0509	0.0148	0.0598	0.2992	0.124	0.0682	0.0755	2.3184	0.0697	0.0184	0.083	0.0528
LINC02238	0	0	0	0.0341	0.084	0	0	0	0	0	0	0	0	0	0	0	0	0	0	0	0	0	0	0	0	0	0	0.03	0.0444	0	0	0	0	0	0	0	0	0	0	0.0154	0	0	0	0	0	0	0	0	0
CASP1P1	0	0	0	0	0	0	0	0	0	0	0	0	0	0	0	0	0	0	0	0	0	0	0	0	0	0	0.0723	0	0	0	0	0	0	0	0	0	0	0	0	0	0	0	0	0	0	0	0	0	0
RN7SL483P	0	0.2476	0.1075	0	0.0483	0	0.2294	0	0	0.376	0	0.3799	0.1104	0	0	0	0.0563	0	0.3556	0.0428	0	0.0408	0.0411	0	0	0.0813	0.0537	0.0432	0	0.0806	0	0.06	0.0882	0.041	0.1001	0.0454	0	0	0.1473	0.1767	0	0.0687	0.1698	0.1115	0.0492	0.0386	0.2448	0	0.0702
AL139230.1	0	0.0415	0	0	0	0	0	0.0306	0	0	0.0392	0.0255	0	0.077	0	0	0	0	0	0	0.1554	0.0548	0	0	0	0.0273	0	0.0289	0	0.027	0	0	0	0.0825	0	0	0	0	0	0	0	0	0	0	0	0	0	0.037	0
RNU6-939P	0	0	0	0	0	0	0	0	0	0.1669	0	0	0	0	0.0839	0	0	0	0	0	0.2057	0.1088	0	0	0	0	0	0	0	0	0	0	0	0	0	0.1209	0	0	0	0	0	0	0.3016	0	0	0	0	0	0
AC009950.1	0.1793	0.1606	0.1354	0.1158	0.2763	0.4241	0.2218	0.0801	0.1559	0.2344	0.1517	0.2087	0.0842	0.2324	0.0385	0.1708	0.2106	0.2827	0.1402	0.2811	0.4657	0.7885	0.135	2.4147	0.1183	0.1179	0.3446	0.1351	0.1023	0.3108	0.2094	1.4243	0.5486	0.1408	0.0306	0.1628	0.1182	0.084	0.1987	0.2124	0.4291	0.0839	0.3155	0.1702	0.0639	0.1619	0.1464	0.059	0.0321
TXNDC12-AS1	0.1223	0.3158	0.3527	0.0714	0.1055	0.0476	0.0557	0.1331	0.3609	0.0457	0.1704	0.0831	0.1609	0.2931	0.1148	0.1255	0.1642	0.0818	0.3888	0.5932	0.2252	0.0298	0.06	0.2077	0.0892	0.1482	0.1959	0.2517	0.0465	0.1763	0.1639	0.1749	0.0964	0.0897	0.2555	0.0662	0	0.1234	0.0358	0.161	0.5997	0.0501	0.4952	0.1219	0.1076	0.1968	0.0892	0.2815	0
OR2E1P	0	0	0	0	0	0	0	0	0	0	0	0	0	0	0	0	0	0	0	0	0	0	0	0	0	0	0	0.0249	0	0	0	0	0	0	0	0	0	0	0	0	0	0	0.0327	0	0.0568	0	0	0	0
AC018866.1	0	0	0	0	0	0	0	0	0	0	0.0281	0	0	0.0277	0	0.0276	0	0	0	0	0	0	0	0	0	0	0	0	0	0	0	0	0	0.0197	0	0	0	0	0	0	0	0	0.5996	0	0	0	0	0	0
RF02250	0	0.1953	0	0	0	0	0	0	1.1716	0	0.1844	0	0	0	0.0331	0.0603	0	0	0	0	0.0812	0	0	0	0.1716	0	0	0.0908	0	0	0.473	1.0096	0	0	0.1053	0	0.2125	0	0	0	0.0721	0.0722	0.2382	0	0	0	0.0429	0	0
AC091959.3	0.0072	0.1119	0.0231	0.0169	0.0125	0.0394	0	0.0511	0.0266	0.0216	0.0503	0.0425	0.038	0.0247	0.0081	0.0395	0.0048	0.029	0.0255	0.0258	0.0199	0.0879	0.0566	0.0613	0.0808	0.042	0.0463	0.1189	0.0989	0.0798	0.0658	0.0362	0.0342	0.0106	0.0603	0.0391	0.029	0.0219	0.0719	0.0494	0.0118	0	0.0487	0.024	0.0339	0.0465	0.0773	0.0522	0
RPS2P7	4.8773	6.4186	3.7222	9.4437	6.4508	6.6518	9.5048	5.4688	9.9456	5.3282	5.3456	5.1988	5.7585	7.0481	7.6794	4.5276	8.4685	7.788	3.8741	4.0139	5.7449	0.7627	2.4898	5.0787	2.1149	8.0934	4.0156	4.8921	3.864	2.7526	2.6937	3.2462	9.627	5.8757	2.4995	2.7627	3.8819	6.1314	9.1104	2.7029	4.9015	7.0126	2.899	4.2016	8.0053	5.18	3.6393	3.0739	5.9427
MIR204	0.0913	0	0	0	0	0	0	0	0	0	0	0	0	0	0	0	0	0	0	0	0	0	0	0	0	0	0	0.2817	0	0	0	0.1305	0.0959	0	0	0	0	0.092	0.2137	0	0	0	0	0	0	0	0	0	0
CFAP47	0.0159	0	0.0041	0.0012	0.2151	0.0017	0.0232	0.0035	0	0.0317	0.0104	0.0019	0.0009	0.0422	0.012	0.0102	0.0043	0.0142	0.1051	0.0033	0	0.001	0.0489	0.018	0.281	0.0154	0	0.0153	0.1051	0.0582	0.0091	0	0.0022	0.0208	0.0063	0.0483	0	0.0129	0	0.0593	0.1267	0.0052	0.0459	0.0706	0.0037	0.0186	0.0041	0.0098	0.0338
AC073968.1	0	0	0	0	0	0	0	0	0.0277	0	0	0	0	0	0	0	0	0	0	0	0	0	0.0184	0	0	0	0	0.0193	0	0	0	0	0	0	0	0	0	0	0	0	0	0	0.0507	0	0	0	0	0	0
OR7A11P	0	0	0	0.0146	0.0577	0	0	0	0	0	0.035	0	0	0	0	0	0	0	0	0	0	0	0	0	0	0	0	0.0387	0.0191	0	0	0	0	0	0	0.0271	0	0	0	0	0	0	0.0508	0	0.0736	0	0	0	0
RAC1P7	0	0	0	0	0	0	0	0	0	0	0	0	0	0	0	0	0	0	0	0	0	0	0	0	0	0	0	0	0.0482	0	0	0	0	0	0	0.0343	0	0	0	0	0	0	0	0	0	0	0	0	0
LINC00692	0	0	0	0	0.0147	0	0	0	0	0	0	0	0	0	0	0	0	0.0171	0	0	0	0	0	0	0	0	0	0.0395	0	0	0	0.0183	0	0	0	0	0	0	0	0.0135	0	0	0.0346	0	0.015	0	0	0	0
AL138767.1	0	0	0	0	0.037	0	0	0	0	0	0	0.0146	0	0	0	0	0.0216	0	0	0	0	0	0	0.0364	0	0	0	0.0331	0.0244	0	0	0	0	0.0157	0	0.0348	0	0.0162	0	0	0	0	1.2145	0	0	0	0	0	0
PCNPP5	0.2734	0.1834	0.2548	0.174	0.0572	0.1937	0	0.1082	0.2567	0.1114	0.0346	0.2251	0.1308	0.1361	0.224	0.102	0.0334	0.1995	0.2107	0.2538	0.0915	0.121	0.0487	0.0563	0.0725	0.0482	0.1274	0.3836	0.0378	0.0478	0.0533	0.1778	0.3919	0.2186	0.1187	0.0807	0.0399	0.1504	0.0873	0.1309	0.2437	0	0.2348	0.033	0.1167	0.2057	0.1209	0.2615	0
TRAV29DV5	0	0	0.1307	0	0	0	0	0	0	0.1143	0	0	0	0	0.0191	0	0	0.0341	0	0	0.0469	0.0248	0.1749	0	0	0.0247	0	0.1049	0	0	0	0	0	0	0	0	0	0.0257	0	0	0	0	0.0688	0.0678	0	0	0	0.0335	0
AC099344.1	0	0.0333	0	0	0	0	0	0	0	0	0	0	0	0	0	0	0	0	0	0	0	0	0	0	0	0	0	0	0	0	0	0	0	0	0	0.0122	0	0	0	0	0	0	0.0152	0	0	0	0	0	0
AC233702.6	0	0.0377	0	0.0448	0.2207	0.0996	0.0233	0.0974	0.0755	0.1146	0	0.1968	0.0897	0.1576	0.1632	0.1399	0.2918	0.1197	0	0.1175	0.1412	0.0622	0.1254	0.0434	0.0249	0.0248	0	0	0.0195	0	0.0274	0.0183	0	0.4499	0.0458	0	0.0205	0.0516	0.0449	0	0.0836	0.1256	0.0518	0	0	0.0705	0	0.0505	0
AL445222.1	1.5612	1.4046	1.2443	0.1111	1.0953	0.6823	4.4417	1.3052	1.3201	1.2514	1.1671	2.0686	2.7217	1.5642	1.6012	0.7292	2.1977	1.7825	1.5599	1.9827	1.1916	1.0006	1.3624	0.8192	0.3702	1.2181	0.7074	1.5081	1.7089	1.1345	0.449	0.8169	1.0005	4.1308	0.9544	1.8539	0.9474	0.8641	2.0506	0.842	1.4935	1.5899	2.8263	1.9231	0.8042	0.9628	1.1664	1.1769	0.3184
LINC01704	0.1434	0.1269	0.2205	0.1506	0	0.0223	0.1829	0.156	0.0634	0.2356	0.0799	0.1168	0.0503	0	0.0538	0.0392	0	0.3451	0.0405	0.1025	0.132	0.0837	0.0422	0.211	0.0558	0.0695	0	0.0885	0.109	0.0689	0.0307	0.0615	0.0301	0.042	0.0684	0.0776	0	0.0434	0.1007	0.0604	0.1874	0.1174	0.2902	0	0.0336	0.0791	0	0.0189	0.3117
RN7SL7P	0	0	0	0	0	0	0	0	0.0592	0	0	0	0	0	0	0	0	0	0	0	0	0.0391	0	0	0	0	0	0	0	0	0	0	0.2108	0	0	0	0	0.0405	0	0	0	0	0.3249	0	0	0	0	0	0
OR2W2P	0	0	0	0	0.0151	0.0205	0.1199	0	0.1164	0	0	0.0238	0	0	0.0099	0.018	0	0.0352	0.0186	0	0.0242	0	0.0129	0.0447	0.0128	0	0	0	0.04	0	0.0141	0.1693	0.0415	0	0.0157	0.0427	0	0	0.0154	0	0.043	0	0	0.0175	0	0	0.0256	0	0.022
AL137003.2	1.7761	1.8211	0.8029	0.3958	1.1057	0.9689	1.6486	1.1483	2.1406	0.9501	0.6957	1.8896	0.8387	0.587	0.5412	0.3609	1.7895	1.1279	1.291	2.0922	3.0699	2.4072	1.0252	1.1629	0.4901	2.0915	1.2554	0.9159	1.0535	1.073	1.4544	2.5132	1.1734	3.2505	2.2773	1.8248	1.8224	0.4038	1.1803	0.9624	1.7554	1.3036	1.3224	2.3166	1.8241	1.0439	2.0937	1.6852	1.1346
AC013399.1	0	0	0	0	0	0	0.0521	0	0	0	0.0399	0	0	0	0	0	0.0384	0	0	0.0292	0	0	0	0.0648	0	0	0	0.0294	0	0	0	0	0.0301	0	0	0.0309	0	0	0	0.0602	0	0	0.3474	0	0.0671	0	0	0.0376	0
MIR381HG	0	0	0	0	0	0	0.4102	0.0306	0	0	0	0	0	0.077	0	0	0	0.0376	0	0	0	0	0	0	0	0	0	0	0	0	0	0	0	0	0	0	0	0	0	0	0	0	0	0	0	0	0	0	0
MAGEB18	0	0	0	0	0	0	0	0.0072	0	0.0099	0.0184	0.012	0.0058	0.009	0	0.0452	0	0.0353	0.028	0	0	0.0193	0.0194	0	0.0128	0	0	0.0204	0.01	0.0127	0	0	0	0.0065	0	0	0	0.04	0	0	0	0	0.0267	0.0175	0.0077	0.0121	0	0	0
AC091057.4	0.9461	1.2274	1.6931	0.4188	0.4504	1.3724	8.8596	0.8875	1.2513	1.657	1.5908	2.0381	1.3733	1.0051	2.0087	0.714	1.861	2.1162	1.9816	1.9818	2.4922	0.6509	1.7589	1.1636	0.3489	1.7551	1.3793	1.2417	1.1663	1.3795	0.5595	0.6999	0.3943	2.1681	0.7982	0.7059	1.5972	0.5593	2.4826	0.2405	2.879	0.9615	2.9938	2.905	1.9139	0.7949	0.3648	2.9605	0.9548
TFCP2	10.8539	7.3709	26.644	1.3745	17.7682	22.2072	7.1122	14.8157	0.1844	20.5545	0.6355	4.2884	1.8632	9.5568	5.832	0.4017	11.6705	14.667	35.5178	10.0158	26.3346	20.6924	17.944	10.174	15.669	10.3605	15.182	20.1835	25.1429	7.6566	2.8836	22.7304	10.7668	4.6656	16.3743	19.0615	1.013	0.6711	18.3467	0.1744	6.755	11.9503	6.9273	20.2463	8.0942	1.5713	23.2032	19.3941	1.1966
AC007537.2	2.3867	3.1416	1.2293	2.512	0.6999	0.4739	9.5954	0.9166	1.4843	2.3769	2.2819	1.2711	1.9495	1.2815	2.0732	1.8883	1.0992	3.5363	1.6195	1.1228	0.9907	0.5921	0.734	1.0068	0.3185	1.7011	1.4089	1.0831	0.9611	0.7196	0.6521	0.7697	3.5412	1.7608	0.8658	0.6076	0.8263	1.1563	1.7531	0.887	2.9444	4.7891	1.863	1.0262	1.2354	1.0111	0.5006	0.6155	15.1447
RF00066	0	0	0	0	0	0	0	0	0	0	0	0	0	0	0	0	0	0	0	0	0	0	0	0	0	0	0	0	0	0	0	0	0	0	0	0	0	0	0	0	0	0	0	0	0	0	0	0	0
ASB16	0.2306	0.3085	0.4466	1.9021	0.3825	0.4177	0.0977	0.3501	0.4983	0.6568	0.6648	0.3155	0.174	0.6681	0.2939	0.4254	0.4462	0.9896	0.621	1.1714	0.4343	0.7775	0.4362	0.601	0.5943	0.4885	0.4671	0.5405	0.2121	0.6338	0.7012	0.6518	0.3268	0.1362	0.4928	0.7019	0.1549	0.3623	0.2762	0.717	0.149	0.1405	0.2677	0.2779	0.2516	0.6409	0.4588	0.3173	0
AC234771.3	0	0	0	0	0	0	0	0	0	0	0	0	0	0	0	0	0	0	0	0	0	0	0	0	0	0	0	0	0	0	0	0	0	0	0	0	0	0	0	0	0	0	0	0	0	0	0	0	0
C1orf210	0.1814	0.5935	1.2633	0.0184	1.8965	0.4055	0.0431	0.0086	2.5481	0.648	0.2527	0.7284	0.0553	0.108	0.1658	0.0324	0.6246	4.5253	1.5374	0.0161	0.8421	0.6909	1.4844	0.0714	0.0844	3.2568	0.4648	0.2272	2.3637	0.7883	0.0592	2.1996	0.0249	0.0385	0.8096	0.4011	0.2279	0.2386	0.0554	0.0498	2.32	3.2802	2.1074	6.373	0	0.145	0.7747	1.2551	2.2161
AC112229.4	0	0	0	0.0091	0	0	0	0	0	0	0	0	0.0069	0.0107	0	0	0	0	0	0	0	0	0	0.0089	0	0.0076	0	0.008	0	0	0.0084	0	0	0	0	0.0085	0	0	0	0.0165	0	0	0.0106	0	0.0092	0	0	0	0
AC131159.2	0.4428	0.4775	0.5238	0.5366	0.7055	0.2388	0.0931	0.2595	0.7035	0.6615	0.3797	0.694	0.1643	0.4431	0.5371	0.0466	0.1143	0.6606	0.2887	0.3652	0.8152	0.2984	0.2838	0.6171	0.3975	1.1227	0.2182	0.2979	0.3368	0.2619	0.3469	0.4628	0.3043	0.4494	0.5895	0.3133	0.2187	0.2233	0.2193	0.3766	0.1392	0.0837	0.3218	0.4754	0.3797	0.1566	0.2484	0.2688	0.0285
AC093325.1	0	0.2165	0.282	0	0.0422	0.4	0	0.8381	0.2705	0.1096	0.0511	0.1328	0.0322	0.3515	0.2203	0	0.3446	0.4905	0.1554	0.1498	0.0675	0.1428	0.5393	0	0.0357	0.1778	0.094	0.2264	0.1674	0.1762	0.0393	0.0525	0	0.1792	0.1313	0.119	0.0589	0.037	0.2576	0	0.1199	0	0.1485	0.3412	0.9468	0.1349	0.0357	0.5788	0
AC007128.2	0.5743	0	0.8363	0.0152	0.1352	0.0407	0.0238	0	0.077	0.039	0	0	0.0229	0.0894	0.1568	0	0.6132	0	0.7744	0.0133	0	0.0635	0.0256	0.0296	0.0127	0.2024	0.0167	0	1.0922	0	0	0	0	0.1021	1.4957	0.0847	0	0.0921	0.0764	0	0.0213	0.0641	0.5461	0.3296	0	0.324	0.3681	0.0172	0
AC121761.1	0.9278	1.7022	1.0545	0.7061	1.2624	0.3017	0.1912	0.3951	2.0115	0.1205	0.3035	0.3433	0.1769	1.0163	0.6482	0.7394	0.6606	0.5395	0.5242	0.2389	0.8762	0.6674	0.4192	0.3928	0.7374	1.048	0.062	0.2988	0.3805	0.2791	0.5189	0.2077	1.9248	1.4587	0.6259	0.3492	0.1166	0.4556	0.2928	2.3022	0.3955	0.4359	0.5335	0.3431	0.5964	0.267	0.3452	0.5199	0.054
AC092718.6	0.0241	0.4268	0.1236	0	0.2496	0.0751	0	0.0787	0.1067	0.036	0.0672	0.3492	0.1268	0.132	0.0905	0.0659	0.0324	0.0645	0.2043	0.1969	0.3106	0.2581	0.2363	0.3275	0.2813	0	0.0926	0.124	0.0367	0.1622	0.0517	0.4137	0.0507	0.0471	0.0575	0	0.0387	0.0486	0.1411	0.0761	0.1576	0.0789	1.6916	0	0.0566	0.0443	0.0469	0.0634	0
RF00181	0	0	0	0.186	0	0	0	0	0	0	0.2221	0	0	0	0	0	0	0	0	0	0	0	0	0	0	0	0	0	0	0	0.1709	0	0	0	0	0.1725	0	0	0	0	0	0	0	0	0	0	0	0	0
PLEKHA6	1.0764	5.7864	7.8509	5.1546	8.0323	3.0803	0.5462	1.0748	2.4992	7.4827	1.964	3.2796	1.2618	6.8731	1.1297	0.8972	6.7601	3.2351	14.3733	3.4077	1.3791	3.4584	4.1232	5.462	8.2182	8.8348	4.8109	1.9771	10.6043	8.9488	9.4947	2.108	0.3985	6.9574	2.6553	2.0066	1.1265	1.9121	3.4726	6.4689	2.2488	2.2432	2.3688	6.1246	0.3427	1.8346	4.7476	3.8508	0.225
HS3ST2	0.2479	0.1422	0.1294	0.1178	1.7902	1.1514	0.2008	0.0599	8.6671	1.1588	0.4476	0.3034	3.2283	0.5593	0.1482	0.3579	0.3265	0.3008	0.0584	0.4171	71.9858	0.1653	0.306	0.7328	0.0982	0.6095	0.9938	0.2408	0.1885	0.3529	3.9656	51.1499	21.1961	0.2512	0.1863	0.9833	0.4273	1.2591	1.166	0.116	0.9076	0.1052	0.446	0.9394	0.1508	0.135	0.1562	0.326	0.6371
TOR1AIP1	9.395	7.3922	6.6657	11.9225	5.6314	6.7717	6.439	5.4017	6.9987	6.8121	3.8479	5.4022	4.9655	5.0145	3.002	6.2272	6.7916	8.5006	11.3369	5.0111	9.6898	14.6422	5.3368	10.2575	18.2081	6.2549	6.2531	7.5142	8.9008	9.6218	5.5307	9.1326	11.1077	8.2095	4.8327	8.265	5.6589	4.9889	5.1347	5.9657	7.9725	20.0258	7.3521	5.3729	6.083	6.2508	6.0513	4.4075	6.4474
EDA	0.8388	0.3655	1.8586	0.5064	1.6392	1.1179	1.426	1.8478	0.436	1.7405	0.5212	0.7579	0.397	0.5871	0.6465	0.1262	0.6099	1.2452	1.3731	0.3122	0.305	0.552	0.7636	0.53	1.1046	0.5398	0.3042	1.2969	0.6679	0.9096	0.3113	0.5058	0.4022	0.1569	0.524	0.56	0.3894	3.3045	0.444	0.1565	0.1675	0.2182	0.2859	1.0875	0.4771	0.5325	0.9719	0.7257	0.22
OR5AW1P	0.0238	0	0.0152	0	0	0	0	0	0.0175	0	0.0166	0	0	0.0163	0.0178	0	0	0	0.0336	0.0121	0	0	0	0	0	0	0.0152	0	0	0	0	0	0	0	0.0851	0.0129	0	0	0	0	0	0	0.0321	0	0	0.0109	0	0	0
STK32B	2.6276	0.1856	1.4821	1.5488	0.6666	1.7496	0.352	1.8524	0.265	2.1371	0.2941	1.4742	0.1812	0.1538	0.5194	0.3717	0.2411	1.2495	0.2443	0.1123	1.3808	0.9071	2.4304	0.2238	0.3057	0.4485	0.1122	0.8848	0.5979	1.2389	0.1204	0.8993	0.0991	0.1032	0.7693	0.7751	0.0613	0.8584	0.9912	0.2176	0.5028	0.342	0.3243	0.0895	0.3057	0.415	0.1594	0.5346	0.3718
RF02091	0	0	0	0	0.0736	0	0	0	0	0	0	0	0	0	0	0	0	0	0	0	0	0	0	0.0724	0	0	0	0	0	0	0	0	0	0	0	0	0	0	0	0	0	0.2094	0	0	0	0	0	0	0
RPL7A	530.1605	701.1952	725.823	761.6512	626.3249	935.779	1164.0713	714.1771	929.918	398.4426	1427.2232	1055.2581	1756.1768	1005.0739	982.4989	1244.7575	1202.4191	848.6264	1166.8287	1013.871	730.5427	596.3569	527.61	981.656	397.4862	701.3485	567.9778	748.7978	909.7116	683.0185	424.3371	473.2785	1007.1192	943.6223	621.1294	636.03	702.0459	823.0936	1048.2362	982.0192	1303.074	1759.9421	956.3012	1092.2689	959.0275	597.355	906.9354	658.0589	2452.828
HSPD1P4	0.0351	0.228	0.135	0.0738	0.3152	0.1861	0.1024	0.1147	0.1969	0.021	0.2936	0.2544	0.0863	0.2116	0.2532	0.0577	0.1132	0.2537	0.258	0.1434	0.3362	0.1162	0.0964	0.2943	0.1844	0.0749	0.09	0.4047	0.0534	0.2768	0.1205	0.1206	0.0369	0.2128	0.1258	0.0988	0.1353	0.2125	0.1316	0.1184	0.2411	0.1495	0.3887	0.2054	0.0907	0.2067	0.2938	0.1478	0.0705
PRPF4B	14.2982	34.3284	19.6966	10.1178	12.7624	22.7634	19.621	15.6278	15.5988	20.2411	10.1762	16.4005	16.8359	19.0963	16.2777	30.4017	14.664	16.3823	33.4459	21.1663	17.652	25.8253	20.5392	18.9662	27.3459	23.13	19.5301	19.6884	19.0411	23.4337	16.5614	18.0838	16.2422	16.5519	33.416	23.4613	19.1045	8.6153	18.5005	26.0819	18.6971	16.9123	17.8275	15.7895	16.6765	19.3725	25.4934	20.699	12.1729
MCM9	0.8956	3.0706	1.9201	0.8207	1.0778	2.2154	0.4778	1.2796	1.3099	1.3608	0.5226	0.8351	0.9415	1.1922	1.0719	1.958	0.7937	0.9125	2.3531	1.8873	1.6662	2.4604	0.9445	1.8483	3.4814	1.369	1.7897	1.4489	1.5721	2.1518	1.5724	2.3018	0.8719	1.1633	3.5575	2.0643	1.7601	0.828	1.044	3.0397	1.0539	0.962	1.4049	1.2132	0.7567	1.8009	2.5765	1.6397	0.8081
RF00019	0	0	0	0	0.3652	0	0	0	0	0	0	0	0	0	0.1589	0	0	0	0	0.3241	0	0.103	0	0.1198	0.2058	0	0.1356	0	0.161	0	0	0	0	0.2068	0	0	0	0	0	0.1114	0	0	0.2856	0	0	0.2919	0.1029	0	0
CTNNAL1	10.8073	31.0736	16.0509	7.3395	11.9332	18.0462	14.9364	16.4386	21.56	14.1649	12.689	17.2499	19.4483	10.8028	13.1271	19.5045	10.6153	11.7728	25.4664	19.568	17.3069	25.1621	19.2375	36.0571	17.9602	19.2748	20.9492	21.1661	26.311	20.5009	16.3047	22.5127	15.4238	18.825	28.369	22.6872	29.8828	15.9905	14.427	33.0532	26.0179	26.8437	15.476	23.2801	22.4664	21.5867	37.3519	20.5764	21.5109
BX248123.2	0	0	0	0	0	0	0	0	0.1422	0	0	0	0	0	0.0724	0.2638	0	0	0	0	0	0	0	0	0	0	0	0	0	0.0927	0	0	0	0	0	0.1043	0	0	0	0	0	0	0.1301	0	0	0	0	0	0
GINS2	4.1541	10.788	12.3879	3.9242	10.1447	11.0041	19.215	7.5057	16.061	7.7214	15.428	15.0545	10.6917	7.4886	14.7459	6.2182	4.317	10.8522	5.6816	11.1338	6.8308	9.8793	13.1248	9.0586	5.0364	9.14	12.1409	12.5598	5.8514	15.1276	4.3862	4.7675	1.8441	6.326	6.1255	8.0734	20.4684	5.3568	16.245	4.9373	26.0832	6.8858	13.8221	7.2345	9.284	7.7938	11.8911	15.3298	9.0367
ZNF600	0.5743	0.43	0.7968	0.3401	0.2534	0.5618	0.2991	0.3806	0.5542	0.429	0.2797	0.4731	0.9884	0.3341	0.2886	0.818	0.2579	0.8692	0.6343	0.7693	0.9976	0.9372	0.7175	0.6698	1.1252	0.36	0.6002	0.2465	0.4894	0.4918	0.6295	1.4698	0.742	0.7005	0.7035	0.5863	0.6862	0.3005	0.5055	0.5502	0.4728	0.3323	0.4225	0.3357	0.2761	0.5558	0.6761	0.548	0.3647
AC133485.5	0	0	0	0	0	0	0	0	0	0	0	0	0	0	0	0	0	0	0	0	0	0	0	0	0	0	0	0	0	0	0	0	0	0	0	0	0	0	0	0	0	0	0.0186	0	0	0	0	0	0
CELSR1	1.1858	5.5337	5.1112	0.8411	4.3195	5.061	0.3982	2.1234	4.0124	2.5594	1.8172	3.3062	2.1986	1.7693	3.2761	3.4776	3.321	1.9306	4.2323	6.0597	7.5898	4.4363	5.9995	5.584	5.9808	3.2808	5.671	8.406	5.6744	5.6961	7.9778	10.0257	1.9812	1.794	6.8703	5.4732	3.7318	1.0217	3.2606	6.5152	1.3107	1.1191	3.3541	3.0563	6.3047	6.4556	6.4393	4.9817	0.153
INPP5A	7.6657	5.3076	8.2769	12.3977	8.4745	9.1538	4.1044	9.9422	5.6068	9.4224	8.8279	9.8413	9.2581	13.4648	8.6557	8.0671	8.2234	7.0379	7.8067	7.2663	3.7059	7.7402	8.4885	6.6887	5.5399	7.5933	9.0065	7.3214	9.0554	10.4429	8.0063	4.9972	3.3026	4.0959	8.0867	8.4928	8.0478	9.0421	7.6863	7.8373	4.1758	3.5183	9.8138	13.2793	6.7761	9.9078	10.0775	10.3446	1.5486
AC022001.1	0.2231	0.5924	0.2287	0	0.308	0.139	0	0.0971	0.1975	0.3999	0.2486	0.3636	0.0783	0.5498	0.3015	0.061	0.2395	0	0.2521	0.6377	0.4106	0.1737	0.3061	0.3536	0.2169	0.1297	0.1715	0.1377	0.543	0.1715	0.2869	0.1914	0.0938	0.0436	0.1598	0.4344	0	0.225	0.3134	0.1409	0.2187	0.0731	0.301	0.1779	0.1047	0.2461	0.0868	0.2347	0
AC068413.1	0.0462	0.0455	0	0.1798	0	0	0.0281	0.0335	0	0.0691	0.1932	0.014	0	0	0.0347	0.0211	0.0414	0.0412	0	0.0157	0	0	0.0302	0	0	0	0	0.1427	0	0.0148	0	0.022	0.0648	0.0301	0	0	0	0.1865	0	0.0487	0.0504	0	0.0832	0	0.1266	0.0142	0	0.0203	0
MTATP6P11	0.0714	0.0263	0.1829	0.0625	0.1643	0.0556	0	0.0777	0.1316	0.0533	0.0249	0.0323	0.0626	0.0489	0.0536	0.0976	0.1198	0.2387	0.2773	0.2004	0.0986	0.1216	0.07	0.0606	0.0521	0.1557	0.0686	0.1469	0.0271	0.1029	0.0574	0.1021	0.075	0.0523	0.0639	0.0193	0	0.036	0	0.1315	0	0.263	0.1204	0.0237	0.0209	0.1969	0.0521	0.0235	0.0298
JAML	0.3189	0.0637	0.5335	0.4257	0.3476	0.2755	0.1015	0.1136	0.0534	0.5075	0.1785	0.1702	0.1038	0.3985	0.1568	0.0686	0.2766	0.6537	0.3108	0.0156	0.2614	0.1626	0.273	0.0725	0.1015	0.135	0.0838	0.1862	0.3728	0.0923	0.1134	0.1772	0.101	0.1647	0.0532	0.1446	0.0246	0.25	0.4238	0.0117	0.2731	0.2896	0.0846	0.1351	0.1144	0.0576	0.1828	0.1831	0.1304
RN7SL144P	0.1216	0.1196	0.0519	0	0.2332	0	0	0.1323	0	0	0.0565	0.2202	0.2133	0.0555	0	0.0554	0.0544	0	0	0.1655	0	0.0789	0.1192	0	0.0394	0	0.0519	0.1251	0	0	0.0869	0	0.2556	0.0396	0.0484	0.0877	0	0	0.1424	0	0.3312	0.0664	0.1641	0	0.0476	0.2236	0	0.1066	0
AC005726.2	0.0079	0.1281	0.1214	0.0092	0.0817	0.0984	0	0.0344	0.0466	0.1061	0	0.0286	0.1107	0.1297	0.0356	0.0972	0.1271	0.0528	0.4459	0.3142	0.1162	0.2151	0.147	0.0715	0.1228	0.0995	0.0101	0.1461	0.084	0.0834	0.0423	0.0564	0.0498	0	0.1319	0.1025	0.0253	0.008	0.0185	0.108	0.0129	0	0.1598	0.0524	0.0185	0.0581	0.0767	0.1661	0
TRO	14.4724	9.7741	12.1757	11.9063	11.2105	10.7321	3.6245	12.2181	7.2647	11.3988	6.9177	9.4314	8.2612	12.2469	8.6183	5.4768	10.2896	9.3031	8.1782	12.2126	5.3812	10.7724	17.0156	6.7651	13.3359	12.1371	9.7688	11.9738	11.3887	11.1368	13.8551	4.8378	2.0919	11.4418	10.4972	14.0883	8.6732	6.2285	11.9219	10.213	5.592	5.4163	7.311	9.1449	10.3652	17.2792	7.9398	12.1612	1.3161
NDUFB9P3	0	0	0	0	0	0	0	0	0	0	0	0	0	0	0	0	0	0	0	0	0	0	0	0	0	0	0	0	0	0	0	0	0	0	0	0	0	0	0	0	0	0	0.0322	0	0	0	0	0	0
DCP1A	8.8363	13.1582	18.4977	6.2487	9.448	20.3229	14.2839	13.2801	13.9223	17.9082	11.3944	15.8949	12.6956	14.0762	13.7768	28.719	14.49	10.0904	16.8068	13.8508	10.3744	16.2333	18.7719	13.9867	17.2383	14.925	15.9956	13.4581	13.3978	15.15	14.1683	12.0403	9.1473	10.5449	15.6826	11.0932	23.8566	8.3781	16.3327	17.6942	10.0777	11.5256	12.5488	9.1526	17.5164	14.7937	17.5977	15.4913	9.9154
ZBTB8OS	4.2971	3.1925	4.6386	4.3229	4.5894	3.2869	7.1036	2.7561	6.9337	3.2172	4.0241	4.2831	3.4033	5.7771	4.5563	2.9458	3.7087	7.4727	3.53	6.489	6.7008	4.2185	3.96	4.4974	3.2562	6.1643	5.8392	4.6677	3.915	4.1427	4.7369	3.8259	8.2707	9.4085	3.2616	4.836	4.1092	4.9244	5.7759	5.3305	8.1624	7.8788	5.8447	8.3571	3.1666	4.6795	3.8659	4.0125	5.8276
LSM12	5.0107	8.0707	6.4481	4.4722	7.9427	7.7672	4.6437	6.3826	8.1826	6.0682	6.5542	6.5779	6.267	6.4939	4.8291	11.9912	5.9661	4.4089	8.646	7.2435	7.8847	6.0979	6.7339	6.3573	6.915	6.9845	7.6127	7.9942	7.5773	7.3867	7.2452	6.0955	2.9952	4.8305	6.9249	9.4618	9.5382	6.6362	7.3848	7.8156	5.3177	3.6634	6.3372	7.0154	8.3696	8.4201	7.0981	7.3338	2.248
RF00017	0.2628	0.3877	0	0.6133	0.2016	0.3412	0	0	0.1292	0.2617	0.061	0.3569	0.4609	0.4198	0.2631	0.5991	0.1176	0.3515	0.6805	0.3577	0.3225	0.2984	0.0429	0.5455	0	0.3396	0.0561	0.4055	0.0666	0.2946	0.1408	0.1253	0.1841	0.0428	0	0.1895	0.0703	0	0.3076	0.0461	0.0716	0.0717	2.6006	0.2328	0.3083	0.0805	0.0426	0.2304	0
KLHL28	2.1705	3.5562	2.62	2.9301	5.4662	4.5166	12.1022	3.135	2.4353	1.6013	1.9265	2.7668	2.6501	4.7862	2.3568	3.1875	2.9867	3.8652	3.8731	3.3072	2.8916	2.817	3.9301	2.3335	3.1007	2.9678	3.2434	2.6028	3.232	2.8172	2.5916	2.9263	4.058	4.0181	3.2055	2.3002	2.0271	2.5637	3.1424	2.5099	8.6328	4.5332	2.4375	1.6449	3.0331	2.2774	3.2956	3.3471	2.1542
LINC02573	0	0	0	0	0	0	0	0	0	0	0	0	0	0	0	0	0	0	0	0	0	0	0	0	0	0	0	0.0285	0	0	0	0	0	0	0	0	0	0	0	0.0146	0	0	0	0	0.0162	0	0	0	0
AL122125.1	0.2989	0.2058	0.5618	0.2791	0.3439	0.1552	3.3415	0.3469	1.4111	0.1191	0.472	0.6495	0.5068	0.382	0.3442	0.1363	0.4547	1.306	0.2252	1.2411	0.8804	0.3103	0.1367	1.0154	0.3681	1.1204	0.6383	0.3895	0.1213	0.249	0.0427	0.171	1.9268	0.7011	0.2141	0.884	0.3199	0	0.3499	0.1679	0.5211	0.2937	0.6454	0.5827	0.3975	0.3481	0.3294	0.4193	0
MED15P6	0	0	0	0	0.0418	0	0.1103	0	0	0	0.0337	0	0	0	0	0	0	0.0324	0	0	0	0	0	0.0137	0	0	0	0.0124	0	0	0	0	0	0	0	0	0	0.0122	0	0	0	0	0.0163	0	0	0	0	0	0
LINC01678	0.0552	0.0203	0.0353	0.0322	0.0952	0.0215	0	0.015	0.0203	0.0206	0.0576	0	0.0363	0	0	0.0189	0	0.0553	0.0779	0.0141	0	0.0537	0.0541	0.0468	0	0.0267	0.0177	0.0284	0	0.0398	0.0887	0.0197	0.029	0.0135	0.0658	0.0149	0	0.0139	0	0.0145	0	0	0	0.0183	0	0.0507	0	0	0
RN7SL592P	0	0.0628	0	0	0	0	0	0	0.1883	0	0	0	0	0.0583	0	0.1746	0	0	0.0601	0	0	0	0.1251	0	0	0.2062	0	0.1751	0	0.0818	0	0.0609	0	0	0	0.046	0	0	0.0498	0.0448	0	0.0697	0.0574	0.0566	0	0	0.1655	0.056	0
PJA2	28.3001	37.3857	30.4996	53.6416	50.9894	39.3726	33.5591	38.8394	26.9132	32.8916	25.1929	37.2022	34.8149	31.2524	18.1796	35.4557	34.6994	32.0691	31.7718	33.8065	48.4915	29.1516	39.4645	38.8655	40.1583	24.2554	54.5484	37.6042	31.8044	39.9573	45.2045	54.2607	31.3517	27.2233	35.5861	31.8165	34.9524	47.5285	36.7935	21.3839	41.3533	36.1422	23.8092	33.0818	31.5838	27.2256	36.5093	38.0356	25.7047
AC009509.4	1.6913	1.0744	2.649	0.5756	0.7027	0.915	1.1988	1.0224	1.1782	1.93	2.2254	3.2541	0.6592	1.3187	2.8927	0.5141	1.0089	6.1265	0.6305	1.391	3.5025	0.7316	1.0823	1.0373	0.4111	1.2979	0.9329	0.8458	1.6081	0.5644	0.7806	1.5454	14.5413	2.3187	0.5327	1.347	0.5656	1.1845	2.9976	0.9152	0.5758	1.0385	1.3631	2.2166	1.5159	0.8639	0.6625	1.0504	0.1179
AL136298.1	0	0	0	0	0	0	0	0	0	0	0	0.0117	0	0	0	0	0	0.0172	0	0.0132	0.0237	0	0	0.0584	0	0	0	0.0265	0	0	0	0	0.0135	0	0	0	0	0	0	0	0.0632	0.0211	0.0696	0	0.0151	0	0	0	0
RAP1GAP	0.6648	0.5916	0.5618	0.337	1.4557	5.3541	0.2651	0.1944	0.4965	0.3042	0.4834	0.8427	1.4376	0.6401	0.8487	2.0404	0.6693	0.653	0.9391	1.663	2.5777	0.364	0.5417	0.2423	1.0888	0.7089	0.4552	0.6775	0.5626	1.232	0.3051	4.7423	5.616	0.2071	0.4414	1.4858	0.687	0.8172	0.2894	1.2951	0.5297	0.3912	0.6673	1.2204	0.5899	1.2569	0.9375	0.265	0.3475
RPSAP73	0	0.0535	0	0	0.2084	0	0.066	0	0.0535	0.1624	0.1514	0.0328	0	0	0	0	0	0	0	0	0.0667	0	0.0355	0.1231	0.0352	0	0	0.0373	0	0	0	0.0518	0.0381	0.0354	0	0	0	0	0	0	0	0.2966	0.4401	0	0.0425	0	0.0352	0.0477	0.303
AC008752.3	0.3191	0.4708	0.7747	0.0392	0.7922	0.7588	0.3367	0.4386	1.3873	0.577	0	0.2433	0.324	0.8968	0.3026	0.3675	0.0902	1.0556	0.6168	0.7715	1.422	0.6211	1.1852	0.2472	0.7021	1.0906	0.4303	0.6737	0.4343	0.8715	0.576	3.4345	1.0942	0.2954	0.5412	0.4724	0.1078	0.0339	0.4129	0.336	0.494	0.4674	0.7479	0.5133	0.5123	0.7411	0.4246	0.5301	0.3932
LINC01568	0	0	0	0	0.0101	0	0	0.0032	0.0043	0	0	0.0027	0	0	0.011	0.008	0.0039	0.0313	0.0041	0	0.124	0.0029	0.0029	0.0133	0	0	0	0.0422	0.0045	0	0	0.0126	0.0031	0.0115	0	0.0032	0	0	0	0.0031	0.0096	0	0.0553	0	0	0	0	0	0
AC011507.1	0	0	0	0	0.0243	0	0.1922	0.0688	0	0.063	0	0	0	0	0.0158	0	0	0	0	0	0	0	0	0	0	0	0	0	0	0	0	0	0	0	0	0	0	0	0	0	0	0	0.0285	0	0	0	0	0	0
MIR511	0	0	0	0	0	0	0	0	0	0	0	0	0	0	0	0	0	0	0	0	0	0	0	0	0	0	0	0	0	0	0	0	0	0.1343	0	0.1487	0	0	0	0	0	0	0	0	0	0	0	0	0
[truncated: 55,234 more rows]
[truncated: 81 more columns]
